# Supplementary material for: Wild meat hunting and use by sedentarised Baka Pygmies in southeastern Cameroon
Source: PeerJ. 2020 Sep 17;8:e9906. doi: 10.7717/peerj.9906 (PMC7502248; doi:10.7717/peerj.9906)
Supplement: Supplemental Information S2 [file peerj-08-9906-s002.xlsx]

## Sheet: all_data_with_sortie
village_no	date_interview	Mois	Numéro_de_la_maison	ID	question	Time_invested	start_date	start_time	end_date	end_time	Date_de_le_chasse_(if_needed)	Heure_de_la_prisse	result	species_scientific	Class	Order	Family	IUCN_status	CAM Legal Status	MBMi_(kg)	Hunting_method	Âge_adulte/jeune	meat_status	sex	Destin	destination	buyer
6	2018-06-16	6	6	1		8	2018-06-16	9h	2018-06-16	17h	2018-06-16	matin	1	Atherurus_africanus	Mammalia	Rodentia	Hystricidae	LC	Class C	1.93	Chien	Adulte	Frais		Vendu	selling	Bantou
6	2018-06-01	6	6	1		7	2018-06-01	6h	2018-06-01	13h	2018-06-01	matin	1	Cercopithecus_nictitans	Mammalia	Primates	Cercopithecidae	NT	Class C	5.41	Fusil	Adulte	Frais		consommation propre	domestic
6	2018-03-13	3	6	1		11	2018-03-12	6h	2018-03-12	17h			-1
5	2018-04-16	4	1	2		5	2018-04-16	7h	2018-04-16	12h			1	Atherurus_africanus	Mammalia	Rodentia	Hystricidae	LC	Class C	1.93	Piège	Adulte	Frais		Consommation propre	domestic
5	2018-04-19	4	1	2		4	2018-04-19	6h30	2018-04-19	10h30			1	Atherurus_africanus	Mammalia	Rodentia	Hystricidae	LC	Class C	1.93	Piège	Jeune	Décomposé		Consommation propre	domestic
5	2018-05-03	5	1	2		3.5	2018-05-03	6h17	2018-05-03	10h09			1	Atherurus_africanus	Mammalia	Rodentia	Hystricidae	LC	Class C	1.93	Piège	Jeune	Frais		Consommation propre	domestic
5	2018-07-01	7	1	2		3	2018-07-01	7h	2018-07-01	10h	2018-07-01	matin	1	Atherurus_africanus	Mammalia	Rodentia	Hystricidae	LC	Class C	1.93	Piège	Adulte	Frais		consommation propre	domestic
5	2018-06-07	6	1	2		5	2018-06-07	6h	2018-06-07	11h	2018-06-07	Matin	1	Cephalophus_callipygus	Mammalia	Artiodactyla	Bovidae	LC	Class B	18.25	Piège	Jeune	Frais		consommation propre et Vendu	both	Voisin
5	2018-06-22	6	1	2		2	2018-06-22	12h	2018-06-22	14h	2018-06-22	soir	1	Cephalophus_callipygus	Mammalia	Artiodactyla	Bovidae	LC	Class B	18.25	Piège	Adulte	Frais		consommation propre et à vendre	both
5	2018-06-07	6	1	2		5	2018-06-07	6h	2018-06-07	11h	2018-06-07	Matin	1	Cephalophus_dorsalis	Mammalia	Artiodactyla	Bovidae	NT	Class B	20	Piège	Adulte	Frais		consommation propre et Vendu	both	Voisin
5	2018-03-27	3	1	2		8	2018-03-27	7h	2018-03-27	15h	2018-03-27	12h	1	Cephalophus_spp.	Mammalia	Artiodactyla	Bovidae	various	Class B	16.21	Piège	Jeune	Frais		Consommation propre et Vendu	both	Voisin
5	2018-07-01	7	1	2		3	2018-07-01	7h	2018-07-01	10h	2018-07-01	matin	1	Osteolaemus_tetraspis	Reptilia	Crocodilia	Crocodylidae	VU	Class A		Piège	Adulte	Frais		consommation propre	domestic
5	2018-03-22	3	1	2		53	2018-03-20	9h	2018-03-22	14h			1	Philantomba_monticola	Mammalia	Artiodactyla	Bovidae	LC	Class C	6.25	Fusil	adulte	Boucané		à vendre	selling	bayant
5	2018-03-30	3	1	2		6	2018-03-30	8h	2018-03-30	14h	2018-03-30		1	Philantomba_monticola	Mammalia	Artiodactyla	Bovidae	LC	Class C	6.25	Piège	Adulte	Décomposé		Consommation propre	domestic
5	2018-04-19	4	1	2		4	2018-04-19	6h30	2018-04-19	10h30			1	Philantomba_monticola	Mammalia	Artiodactyla	Bovidae	LC	Class C	6.25	Piège	Adulte	Décomposé		Consommation propre	domestic
5	2018-05-30	5	1	2		91	2018-05-26	19h	2018-05-30	12h	2018-05-30	nuit	1	Philantomba_monticola	Mammalia	Artiodactyla	Bovidae	LC	Class C	6.25	Fusil	Adulte	Boucané
5	2018-05-30	5	1	2		91	2018-05-26	19h	2018-05-30	12h	2018-05-30	nuit	1	Philantomba_monticola	Mammalia	Artiodactyla	Bovidae	LC	Class C	6.25	Fusil	Adulte	Boucané
5	2018-05-30	5	1	2		91	2018-05-26	19h	2018-05-30	12h	2018-05-30	nuit	1	Philantomba_monticola	Mammalia	Artiodactyla	Bovidae	LC	Class C	6.25	Fusil	Adulte	Boucané
5	2018-05-30	5	1	2		91	2018-05-26	19h	2018-05-30	12h	2018-05-30	nuit	1	Philantomba_monticola	Mammalia	Artiodactyla	Bovidae	LC	Class C	6.25	Fusil	Adulte	Boucané
5	2018-05-30	5	1	2		91	2018-05-26	19h	2018-05-30	12h	2018-05-30	nuit	1	Philantomba_monticola	Mammalia	Artiodactyla	Bovidae	LC	Class C	6.25	Fusil	Adulte	Boucané
5	2018-05-30	5	1	2		91	2018-05-26	19h	2018-05-30	12h	2018-05-30	nuit	1	Philantomba_monticola	Mammalia	Artiodactyla	Bovidae	LC	Class C	6.25	Fusil	Adulte	Boucané
5	2018-05-30	5	1	2		91	2018-05-26	19h	2018-05-30	12h	2018-05-30	nuit	1	Philantomba_monticola	Mammalia	Artiodactyla	Bovidae	LC	Class C	6.25	Fusil	Adulte	Boucané
5	2018-05-30	5	1	2		91	2018-05-26	19h	2018-05-30	12h	2018-05-30	nuit	1	Philantomba_monticola	Mammalia	Artiodactyla	Bovidae	LC	Class C	6.25	Fusil	Adulte	Boucané
5	2018-05-30	5	1	2		91	2018-05-26	19h	2018-05-30	12h	2018-05-30	nuit	1	Philantomba_monticola	Mammalia	Artiodactyla	Bovidae	LC	Class C	6.25	Fusil	Adulte	Boucané
5	2018-05-24	5	1	2		4	2018-05-24	6h	2018-05-24	10h	2018-05-24	Matin	1	Potamochoerus_porcus	Mammalia	Artiodactyla	Suidae	LC	Class B	70	Fusil	Jeune	Frais		Vendu	selling
5	2018-06-04	6	1	2		4	2018-06-04	6h	2018-06-04	10h	2018-06-04	Matin	1	Potamochoerus_porcus	Mammalia	Artiodactyla	Suidae	LC	Class B	70	Piège	Jeune	Frais		Consommation propre et À vendre	both
5	2018-03-10	3	1	2		55	2018-03-07	8h	2018-03-09	15h	2018-03-07	12h	1	unspecified	unspecified	unspecified	unspecified				Fusil	adulte	Boucané		à vendre	selling
5	2018-03-10	3	1	2		55	2018-03-07	8h	2018-03-09	15h	2018-03-07	11h	1	unspecified_monkey	Mammalia	Primates	unspecified_primates				Fusil	Jeune	Boucané		à vendre	selling	Revendeur/euse
5	2018-03-10	3	1	2		55	2018-03-07	8h	2018-03-09	15h	2018-03-08	14h	1	unspecified_monkey	Mammalia	Primates	unspecified_primates				Fusil	adulte	Boucané		à vendre	selling	Revendeur/euse
5	2018-03-10	3	1	2		55	2018-03-07	8h	2018-03-09	15h	2018-03-08	15h	1	unspecified_monkey	Mammalia	Primates	unspecified_primates				?
5	2018-03-10	3	1	2		55	2018-03-07	8h	2018-03-09	15h	2018-03-08	15h	1	unspecified_monkey	Mammalia	Primates	unspecified_primates				?
5	2018-03-22	3	1	2		53	2018-03-20	9h	2018-03-22	14h	2018-03-20	12h	1	unspecified_monkey	Mammalia	Primates	unspecified_primates				Fusil	adulte	Boucané		à vendre	selling	bayant
5	2018-03-11	3	1	2		8	2018-03-11	9h	2018-03-11	17h			-1
5	2018-03-24	3	1	2		7	2018-03-24	7h	2018-03-24	14h			-1
5	2018-04-06	4	1	2			2018-04-06	7h					-1
5	2018-04-10	4	1	2		5	2018-04-10	7h	2018-04-10	12h			-1
5	2018-04-15	4	1	2		5	2018-04-15	7h	2018-04-15	12h			-1
5	2018-04-23	4	1	2		4	2018-04-23	6h	2018-04-23	10h	2018-04-23		-1
5	2018-04-25	4	1	2		3.5	2018-04-25	6h30	2018-04-25	10h	2018-04-25		-1
5	2018-04-28	4	1	2		6	2018-04-28	6h45	2018-04-28	12h45			-1
5	2018-04-30	4	1	2		3	2018-04-30	10h	2018-04-30	13h			-1
5	2018-05-05	5	1	2		3.5	2018-05-05	7h38	2018-05-05	11h11			-1
5	2018-05-09	5	1	2		3	2018-05-09	7h	2018-05-09	10h			-1
5	2018-05-26	5	1	2			2018-05-26	19h					-1
5	2018-05-28	5	1	2									-1
5	2018-05-31	5	1	2		3	2018-05-31	7h	2018-05-31	10h			-1
5	2018-06-12	6	1	2			2018-06-12	14h					-1
5	2018-06-25	6	1	2		5	2018-06-25	7h	2018-06-25	12h			-1
5	2018-06-30	6	1	2		3	2018-06-30	7h	2018-06-30	10h			-1
5	2018-07-03	7	1	2		3	2018-07-03	7h	2018-07-03	10h			-1
5	2018-07-07	7	1	2		4	2018-07-07	6h	2018-07-07	10h			-1
5	2018-07-10	7	1	2		3	2018-07-10	7h	2018-07-10	10h			-1
5	2018-07-19	7	1	2		4	2018-07-19	6h	2018-07-19	10h			-1
5	2018-03-20	3	1	2									-1
5	2018-03-21	3	1	2									-1
5	2018-05-27	5	1	2									-1
5	2018-05-29	5	1	2									-1
5	2018-06-11	6	1	2			2018-06-11	14h					-1
5	2018-06-14	6	1	2		70	2018-06-11	12h	2018-06-14	10h			-1
5	2018-06-17	6	1	2		5	2018-06-17	7h	2018-06-17	12h			-1
5	2018-07-05	7	1	2		5	2018-07-05	7h	2018-07-05	12h	2018-07-05		-1
4	2018-03-14	3	9	5									-1
7	2018-03-14	3	6	6		19	2018-03-13	17h	2018-03-14	12h	2018-03-13	20h	1	Atherurus_africanus	Mammalia	Rodentia	Hystricidae	LC	Class C	1.93	Fusil	Adulte	Frais		Vendu	selling	Revendeur/euse
7	2018-03-29	3	6	6		14	2018-03-28	17h	2018-03-29	7h	2018-03-28	22h	1	Atherurus_africanus	Mammalia	Rodentia	Hystricidae	LC	Class C	1.93	Fusil	Adulte	Frais		Vendu	selling	Revendeur/euse
7	2018-07-10	7	6	6		7	2018-07-10	8h	2018-07-10	15h	2018-07-10	matin	1	Cephalophus_callipygus	Mammalia	Artiodactyla	Bovidae	LC	Class B	18.25	Fusil	Jeune	Frais		Vendu	selling	Revendeur/euse
7	2018-03-14	3	6	6		19	2018-03-13	17h	2018-03-14	12h	2018-03-13	23h	1	Cephalophus_spp.	Mammalia	Artiodactyla	Bovidae	various	Class B	16.21	Fusil	Jeune	Frais		Consommation propre et Vendu	both	Revendeur/euse
7	2018-03-31	3	6	6		50	2018-03-31	9h	2018-04-02	11h	2018-03-31	13h	1	Cephalophus_spp.	Mammalia	Artiodactyla	Bovidae	various	Class B	16.21	Fusil	Adulte	Frais		Consommation propre et Vendu	both	Revendeur/euse
7	2018-05-22	5	6	6		4	2018-05-22	14h	2018-05-22	18h	2018-05-22	soir	1	Cercopithecus_cephus	Mammalia	Primates	Cercopithecidae	LC	Class C	3.485	Fusil	Jeune	Frais		Vendu	selling	Voisin
7	2018-05-22	5	6	6		4	2018-05-22	14h	2018-05-22	18h	2018-05-23	soir	1	Cercopithecus_nictitans	Mammalia	Primates	Cercopithecidae	NT	Class C	5.41	Fusil	Jeune	Frais		Consommation propre	domestic
7	2018-07-10	7	6	6		7	2018-07-10	8h	2018-07-10	15h	2018-07-10	matin	1	Colobus_guereza	Mammalia	Primates	Cercopithecidae	LC	Class A	10.2	Fusil	Adulte	Frais		Vendu	selling	Revendeur/euse
7	2018-03-18	3	6	6		6	2018-03-18	8h	2018-03-18	14h	2018-03-18	9h	1	Cricetomys_emini	Mammalia	Rodentia	Nesomyidae	LC	CLass C	1.3	Piège	Adulte	Frais		Consommation propre	domestic
7	2018-04-28	4	6	6		1	2018-04-28	7h	2018-04-28	8h	2018-04-28	Matin	1	Cricetomys_emini	Mammalia	Rodentia	Nesomyidae	LC	CLass C	1.3	Piège	Adulte	Frais		Consommation propre	domestic
7	2018-03-29	3	6	6		14	2018-03-28	17h	2018-03-29	7h	2018-03-28	2h	1	Nandinia_binotata	Mammalia	Carnivora	Nandiniidae	LC	Class C	2	Fusil	Adulte	Frais		Vendu	selling	Revendeur/euse
7	2018-03-16	3	6	6		15	2018-03-15	15h	2018-03-16	6h	2018-03-15	21h	1	Phataginus_spp.	Mammalia	Pholidota	Manidae	VU/EN	Class C	2.425	Fusil	Jeune	Frais
7	2018-03-31	3	6	6		50	2018-03-31	9h	2018-04-02	11h	2018-04-01	19h	1	Phataginus_spp.	Mammalia	Pholidota	Manidae	VU/EN	Class C	2.425	Fusil	Jeune	Frais		Vendu	selling	Voisin
7	2018-03-10	3	6	6		54	2018-03-08	9h	2018-03-10	15H	2018-03-08	21h	1	Philantomba_monticola	Mammalia	Artiodactyla	Bovidae	LC	Class C	6.25	Fusil	Adulte	Frais		Vendu	selling	Voisin
7	2018-03-10	3	6	6		54	2018-03-08	9h	2018-03-10	15H	2018-03-08	21h	1	Philantomba_monticola	Mammalia	Artiodactyla	Bovidae	LC	Class C	6.25	Fusil	Adulte	Frais		Vendu	selling	Revendeur/euse
7	2018-03-14	3	6	6		19	2018-03-13	17h	2018-03-14	12h	2018-03-14	3h	1	Philantomba_monticola	Mammalia	Artiodactyla	Bovidae	LC	Class C	6.25	Fusil	Adulte	Frais		Consommation propre	domestic
7	2018-03-16	3	6	6		15	2018-03-15	15h	2018-03-16	6h	2018-03-15	20h	1	Philantomba_monticola	Mammalia	Artiodactyla	Bovidae	LC	Class C	6.25	Fusil	Adulte	Frais		Consommation propre	domestic
7	2018-03-31	3	6	6		50	2018-03-31	9h	2018-04-02	11h	2018-04-02	2h	1	Philantomba_monticola	Mammalia	Artiodactyla	Bovidae	LC	Class C	6.25	Fusil	Adulte	Frais		Vendu	selling	Revendeur/euse
7	2018-03-31	3	6	6		50	2018-03-31	9h	2018-04-02	11h	2018-04-01	20h	1	Philantomba_monticola	Mammalia	Artiodactyla	Bovidae	LC	Class C	6.25	Fusil	Adulte	Frais		Consommation Propre	domestic
7	2018-03-13	3	6	6									-1
7	2018-03-15	3	6	6									-1
7	2018-03-28	3	6	6									-1
7	2018-04-01	4	6	6									-1
6	2018-04-21	4	11	7		10	2018-04-21	7h30	2018-04-21	17h30	2018-04-21	12h	1	Atherurus_africanus	Mammalia	Rodentia	Hystricidae	LC	Class C	1.93	Piège	Jeune	Vivant		Consommation propre	domestic
6	2018-04-22	4	11	7		10	2018-04-22	6h30	2018-04-22	16h35	2018-04-22	13h	1	Atherurus_africanus	Mammalia	Rodentia	Hystricidae	LC	Class C	1.93	Piège	Jeune	Vivant		Consommation propre	domestic
6	2018-04-28	4	11	7		11	2018-04-28	7h	2018-04-28	18h	2018-04-28	11h45	1	Atherurus_africanus	Mammalia	Rodentia	Hystricidae	LC	Class C	1.93	Piège	Jeune	Vivant		Vendu	selling	Bantou
6	2018-05-17	5	11	7		8.5	2018-05-17	9h	2018-05-17	17h30	2018-05-17	soir	1	Atherurus_africanus	Mammalia	Rodentia	Hystricidae	LC	Class C	1.93	Piège	Adulte	Décomposé		consommation propre	domestic
6	2018-06-09	6	11	7		3	2018-06-09	6h	2018-06-09	9h	2018-06-09	matin	1	Atherurus_africanus	Mammalia	Rodentia	Hystricidae	LC	Class C	1.93	Chien	Adulte	Frais		Vendu	selling	Passant
6	2018-06-18	6	11	7		10	2018-06-18	6h	2018-06-18	16h	2018-06-18	matin	1	Cephalophus_callipygus	Mammalia	Artiodactyla	Bovidae	LC	Class B	18.25	Piège	Adulte	Frais		Consommation propre et Vendu	both
6	2018-05-13	5	11	7		10.5	2018-05-13	7h30	2018-05-13	18h	2018-05-13	matin	1	Cephalophus_dorsalis	Mammalia	Artiodactyla	Bovidae	NT	Class B	20	Piège	Jeune	Frais		vendu	selling	Bantou
6	2018-06-26	6	11	7		8	2018-06-26	8h	2018-06-26	16h	2018-06-26	Soir	1	Cephalophus_dorsalis	Mammalia	Artiodactyla	Bovidae	NT	Class B	20	Piège	Adulte	Frais		Consommation propre et Vendu	both	Bantou
6	2018-05-30	5	11	7		9	2018-05-30	9h	2018-05-30	18h	2018-05-30	soir	1	Civettictis_civetta	Mammalia	Carnivora	Herpestidae	LC	Class B	12	Chien	Adulte	Frais		consommation propre	domestic
6	2018-06-20	6	11	7			2018-06-20		2018-06-20		2018-06-20	matin	1	Phataginus_spp.	Mammalia	Pholidota	Manidae	VU/EN	Class C	2.425	Piège	Jeune	Frais		Consommation propre	domestic
6	2018-04-19	4	11	7		10.5	2018-04-19	7h30	2018-04-19	18h	2018-04-19	13h	1	Philantomba_monticola	Mammalia	Artiodactyla	Bovidae	LC	Class C	6.25	Piège	Jeune	Vivant		Vendu ou à vendre	selling	Bantou
6	2018-05-03	5	11	7		7.5	2018-05-03	9h30	2018-05-03	17h			1	Philantomba_monticola	Mammalia	Artiodactyla	Bovidae	LC	Class C	6.25	Piège	Jeune	Décomposé		Consommation propre	domestic
6	2018-05-08	5	11	7		10	2018-05-08	6h	2018-05-08	16h	2018-05-08	10h05	1	Philantomba_monticola	Mammalia	Artiodactyla	Bovidae	LC	Class C	6.25	Piège	Jeune	Vivant		Consommation propre	domestic
6	2018-06-29	6	11	7		9	2018-06-29	7h	2018-06-29	16h	2018-06-29	matin	1	Philantomba_monticola	Mammalia	Artiodactyla	Bovidae	LC	Class C	6.25	Piège	Adulte	Décomposé		Consommation propre	domestic
6	2018-06-07	6	11	7		9	2018-06-07	7h	2018-06-07	16h	2018-06-07	matin	1	Varanus_ornatus	Reptilia	Squamata	Varanidae	VU	Class B	5	Piège	Adulte	Frais		Consommation propre	domestic
6	2018-04-30	4	11	7			2018-04-30						-1
9	2018-05-07	5	4	8		5	2018-05-07	7h	2018-05-07	12h	2018-05-07	Matin	1	Atherurus_africanus	Mammalia	Rodentia	Hystricidae	LC	Class C	1.93	Piège	Adulte	Frais		Consommation propre	domestic
9	2018-05-10	5	4	8		9	2018-05-10	6h	2018-05-10	15h	2018-05-10	matin	1	Atherurus_africanus	Mammalia	Rodentia	Hystricidae	LC	Class C	1.93	Piège	Adulte	Frais		Vendu	selling	Revendeur/euse
9	2018-05-25	5	4	8		5	2018-05-25	7h	2018-05-25	12h	2018-05-25	matin	1	Atherurus_africanus	Mammalia	Rodentia	Hystricidae	LC	Class C	1.93	Piège	Adulte	Décomposé		Consommation propre	domestic
9	2018-06-09	6	4	8		10.5	2018-06-09	5h30	2018-06-09	16h	2018-06-09	soir	1	Bdeogale_nigripes	Mammalia	Carnivora	Herpestidae	LC	Class C	2.5	Piège	Adulte	Décomposé		Consommation propre	domestic
9	2018-06-02	6	4	8		13	2018-06-02	4h30	2018-06-02	17h30	2018-06-02	matin	1	Cephalophus_callipygus	Mammalia	Artiodactyla	Bovidae	LC	Class B	18.25	Piège	Adulte	Frais		Consommation propre et Vendu	both	Revendeur/euse
9	2018-07-03	7	4	8		9	2018-07-03	7h	2018-07-03	16h	2018-07-03	matin	1	Cephalophus_dorsalis	Mammalia	Artiodactyla	Bovidae	NT	Class B	20	Piège	Adulte	Frais		Consommation propre et À vendre	both	Voisin
9	2018-04-26	4	4	8		5	2018-04-26	7h	2018-04-26	12h	2018-04-26	matin	1	Cricetomys_emini	Mammalia	Rodentia	Nesomyidae	LC	CLass C	1.3	Autre	Adulte	Frais		Consommation propre	domestic
9	2018-07-04	7	4	8		3	2018-07-04	11h	2018-07-04	14h	2018-07-04	soir	1	Cricetomys_emini	Mammalia	Rodentia	Nesomyidae	LC	CLass C	1.3	Autre	Adulte	Frais		Consommation propre	domestic
9	2018-07-18	7	4	8		7	2018-07-18	7h	2018-07-18	14h	2018-07-18	matin	1	Cricetomys_emini	Mammalia	Rodentia	Nesomyidae	LC	CLass C	1.3	Piège	Adulte	Frais		Consommation propre	domestic
9	2018-05-10	5	4	8		9	2018-05-10	6h	2018-05-10	15h	2018-05-10	Soir	1	Kinixys_erosa	Reptilia	Testudines	Testudinidae	DD	Class B	1.5	Autre	Adulte	Vivant		Consommation propre	domestic
9	2018-05-20	5	4	8		4	2018-05-20	6h	2018-05-20	12h	2018-05-20	matin	1	Nandinia_binotata	Mammalia	Carnivora	Nandiniidae	LC	Class C	2	Piège	Jeune	Frais		Consommation propre	domestic
9	2018-05-23	5	4	8		4	2018-05-23	8h30	2018-05-23	12h30	2018-05-23	matin	1	Nandinia_binotata	Mammalia	Carnivora	Nandiniidae	LC	Class C	2	Piège	Adulte	Frais		Consommation propre	domestic
9	2018-06-13	6	4	8		10	2018-06-13	7h	2018-06-13	17h	2018-06-13	matin	1	Osteolaemus_tetraspis	Reptilia	Crocodilia	Crocodylidae	VU	Class A		Piège	Adulte	Vivant		Vendu	selling	Passant
9	2018-05-02	5	4	8		7	2018-05-02	7h	2018-05-02	14h	2018-05-02	matin	1	Phataginus_spp.	Mammalia	Pholidota	Manidae	VU/EN	Class C	2.425	Piège	Adulte	Vivant		Consommation propre et Vendu	both	Passant
9	2018-04-28	4	4	8		9	2018-04-28	7h	2018-04-28	16h	2018-04-28	matin	1	Philantomba_monticola	Mammalia	Artiodactyla	Bovidae	LC	Class C	6.25	Piège	Adulte	Frais		Consommation propre	domestic
9	2018-04-28	4	4	8		9	2018-04-28	7h	2018-04-28	16h	2018-04-28	midi	1	Philantomba_monticola	Mammalia	Artiodactyla	Bovidae	LC	Class C	6.25	Piège	Adulte	Frais		À vendre	selling	Revendeur/euse
9	2018-05-04	5	4	8		10	2018-05-04	6h	2018-05-04	16h	2018-05-04	Soir	1	Philantomba_monticola	Mammalia	Artiodactyla	Bovidae	LC	Class C	6.25	Piège	Adulte	Frais		Consommation propre	domestic
9	2018-05-07	5	4	8		5	2018-05-07	7h	2018-05-07	12h	2018-05-07	Matin	1	Philantomba_monticola	Mammalia	Artiodactyla	Bovidae	LC	Class C	6.25	Piège	Adulte	Frais		Vendu	selling	Revendeur/euse
9	2018-05-12	5	4	8		7	2018-05-12	7h	2018-05-12	14h	2018-05-12	matin	1	Philantomba_monticola	Mammalia	Artiodactyla	Bovidae	LC	Class C	6.25	Piège	Adulte	Frais		Vendu	selling	Voisin
9	2018-05-12	5	4	8		7	2018-05-12	7h	2018-05-12	14h	2018-05-12	Soir	1	Philantomba_monticola	Mammalia	Artiodactyla	Bovidae	LC	Class C	6.25	Piège	Adulte	Décomposé		Consommation propre	domestic
9	2018-06-16	6	4	8		11	2018-06-16	6h	2018-06-16	17h	2018-06-16	soir	1	Philantomba_monticola	Mammalia	Artiodactyla	Bovidae	LC	Class C	6.25	Piège	Adulte	Décomposé		Consommation propre	domestic
9	2018-07-09	7	4	8		8	2018-07-09	7h	2018-07-09	15h	2018-07-09	soir	1	Philantomba_monticola	Mammalia	Artiodactyla	Bovidae	LC	Class C	6.25	Piège	Jeune	Frais		Consommation propre	domestic
9	2018-06-13	6	4	8		10	2018-06-13	7h	2018-06-13	17h	2018-06-13	matin	1	unspecified_mongoose	Mammalia	Carnivora	Herpestidae				Piège	Jeune	Frais		Consommation propre	domestic
9	2018-06-23	6	4	8		11	2018-06-23	6h	2018-06-23	17h	2018-06-23	soir	1	unspecified_mongoose	Mammalia	Carnivora	Herpestidae				Autre	Adulte	Frais		Consommation propre	domestic
9	2018-05-15	5	4	8		9	2018-05-15	6h	2018-05-15	15h	2018-05-15	matin	1	unspecified_spotted_fowl	Aves	Galliformes	Numididae				Piège	Adulte	Vivant		Consommation propre	domestic
9	2018-06-28	6	4	8		7	2018-06-28	7h	2018-06-28	14h	2018-06-28	matin	1	unspecified_spotted_fowl	Aves	Galliformes	Numididae				Piège	Adulte	Frais		Consommation propre	domestic
9	2018-05-15	5	4	8		9	2018-05-15	6h	2018-05-15	15h	2018-05-15	matin	1	Varanus_ornatus	Reptilia	Squamata	Varanidae	VU	Class B	5	Autre	Adulte	Frais		Consommation propre	domestic
9	2018-07-21	7	4	8		9	2018-07-21	7h	2018-07-21	16h	2018-07-21	soir	1	Varanus_ornatus	Reptilia	Squamata	Varanidae	VU	Class B	5	Autre	Adulte	Frais		Consommation propre	domestic
9	2018-03-15	3	4	8		10.5	2018-03-15	6h	2018-03-15	16h30			-1
9	2018-04-25	4	4	8		6	2018-04-25	7h	2018-04-25	13h			-1
9	2018-05-30	5	4	8		3.5	2018-05-30	8h30	2018-05-30	12h			-1
9	2018-06-05	6	4	8		10.5	2018-06-05	5h	2018-06-05	15h30			-1
9	2018-06-19	6	4	8		9	2018-06-19	7h	2018-06-19	16h			-1
9	2018-06-26	6	4	8		6	2018-06-26	9h	2018-06-26	15h			-1
9	2018-06-30	6	4	8		5	2018-06-30	7h	2018-06-30	12h			-1
9	2018-07-06	7	4	8		6	2018-07-06	7h	2018-07-06	13h			-1
9	2018-07-08	7	4	8		6	2018-07-09	8h	2018-07-09	14h			-1
9	2018-05-17	5	4	8		4.5	2018-05-17	8h04	2018-05-17	12h30			-1
2	2018-11-08		5	10		3	2018-11-08	8	2018-11-08	11	2018-11-08	matin	1	Atherurus_africanus	Mammalia	Rodentia	Hystricidae	LC	Class C	1.93	Piège	Adulte	Décomposé	Masculin	Consommation propre	domestic
2	2018-11-14		5	10		3	2018-11-14	11	2018-11-14	14	2018-11-14	jour	1	Atherurus_africanus	Mammalia	Rodentia	Hystricidae	LC	Class C	1.93	Piège	Adulte	Frais	Masculin	Vendu	selling	Voisin
2	2018-11-18		5	10		3	2018-11-18	7	2018-11-18	10	2018-11-18	matin	1	Atherurus_africanus	Mammalia	Rodentia	Hystricidae	LC	Class C	1.93	Piège	Adulte	Frais	Masculin	Vendu	selling	Voisin
2	2018-11-27		5	10		2	2018-11-27	12	2018-11-27	14	2018-11-27	jour	1	Atherurus_africanus	Mammalia	Rodentia	Hystricidae	LC	Class C	1.93	Piège	Adulte	Frais	Feménin	Vendu	selling	Voisin
2	2018-12-10		5	10		4	2018-12-10	9	2018-12-10	13	2018-12-10	jour	1	Atherurus_africanus	Mammalia	Rodentia	Hystricidae	LC	Class C	1.93	Piège	Adulte	Frais	Feménin	Vendu	selling	Voisin
2	2018-12-16		5	10		3	2018-12-16	7h	2018-12-16	10h	2018-12-16	matin	1	Atherurus_africanus	Mammalia	Rodentia	Hystricidae	LC	Class C	1.93	Piège	Jeune	Frais	Feménin	Vendu	selling	Voisin
2	2018-12-20		5	10		3	2018-12-20	12h	2018-12-20	15h	2018-12-20	jour	1	Atherurus_africanus	Mammalia	Rodentia	Hystricidae	LC	Class C	1.93	Piège	Jeune	Frais	Masculin	Vendu	selling	Passant
2	2019-01-07		5	10		4	2019-01-07	12h	2019-01-07	16h	2019-01-07	jour	1	Atherurus_africanus	Mammalia	Rodentia	Hystricidae	LC	Class C	1.93	Piège	Jeune	Frais	Masculin	Consommation propre	domestic
2	2019-02-08		5	10		9	2019-02-08	7	2019-02-08	16		matin	1	Atherurus_africanus	Mammalia	Rodentia	Hystricidae	LC	Class C	1.93	Chien	Adulte	Frais	Feménin	Consommation propre	domestic
2	2018-11-01		5	10		5	2018-11-01	7	2018-11-01	12	2018-11-01	matin	1	Bitis_gabonica	Reptilia	Squamata	Viperidae	LC	Class C	3.5	Piège	Adulte	Frais		Consommation propre	domestic
2	2018-12-22		5	10			2018-12-22		2018-12-22		2018-12-22	matin	1	Bitis_gabonica	Reptilia	Squamata	Viperidae	LC	Class C	3.5	Piège	Jeune	Frais	Feménin	Consommation propre	domestic
2	2019-02-02		5	10		53	2019-01-31	9	2019-02-02	14		nuit	1	Cephalophus_dorsalis	Mammalia	Artiodactyla	Bovidae	NT	Class B	20	Fusil	Adulte	Boucané		Consommation propre et Vendu	both
2	2019-02-07		5	10		5	2019-02-07	7	2019-02-07	12		matin	1	Cephalophus_dorsalis	Mammalia	Artiodactyla	Bovidae	NT	Class B	20	Piège	Adulte	Décomposé	Masculin	Consommation propre	domestic
2	2019-02-08		5	10		9	2019-02-08	7	2019-02-08	16		jour	1	Cercocebus_agilis	Mammalia	Primates	Cercopithecidae	LC	Class A	8	Fusil	Adulte	Frais	Masculin	Vendu	selling
2	2019-02-02		5	10		53	2019-01-31	9	2019-02-02	14		jour	1	Cercopithecus_nictitans	Mammalia	Primates	Cercopithecidae	NT	Class C	5.41	Fusil	Jeune	Boucané	Masculin	Consommation propre	domestic
2	2018-10-28		5	10		4	2018-10-28	7	2018-10-28	11	2018-10-28	matin	1	Cricetomys_emini	Mammalia	Rodentia	Nesomyidae	LC	Class C	1.3	Piège	Jeune	Frais	Masculin	Consommation propre	domestic
2	2018-11-05		5	10		3	2018-11-05	9	2018-11-05	12			1	Cricetomys_emini	Mammalia	Rodentia	Nesomyidae	LC	Class C	1.3	Piège	Adulte	Frais	Feménin	Vendu	selling	Voisin
2	2018-11-14		5	10		3	2018-11-14	11	2018-11-14	14	2018-11-14	jour	1	Cricetomys_emini	Mammalia	Rodentia	Nesomyidae	LC	Class C	1.3	Piège	Adulte	Frais	Masculin	Consommation propre	domestic
2	2018-12-07		5	10		6	2018-12-07	7	2018-12-07	13	2018-12-07	matin	1	Cricetomys_emini	Mammalia	Rodentia	Nesomyidae	LC	Class C	1.3	Piège	Adulte	Frais	Feménin	Vendu	selling	Voisin
2	2018-12-14		5	10		5	2018-12-14	8h	2018-12-14	13h	2018-12-14	jour	1	Cricetomys_emini	Mammalia	Rodentia	Nesomyidae	LC	Class C	1.3	Piège	Jeune	Frais	Masculin	Vendu	selling	Voisin
2	2018-12-14		5	10		5	2018-12-14	8h	2018-12-14	13h	2018-12-14	jour	1	Cricetomys_emini	Mammalia	Rodentia	Nesomyidae	LC	Class C	1.3	Piège	Adulte	Frais	Feménin	Consommation propre	domestic
2	2018-12-30		5	10		5	2018-12-30	7h	2018-12-30	12h	2018-12-30	matin	1	Cricetomys_emini	Mammalia	Rodentia	Nesomyidae	LC	Class C	1.3	Piège	Adulte		Feménin	Vendu	selling	Voisin
2	2019-01-05		5	10		5	2019-01-05	7h	2019-01-05	12h	2019-01-05	matin	1	Cricetomys_emini	Mammalia	Rodentia	Nesomyidae	LC	Class C	1.3	Piège	Adulte	Décomposé	Feménin	Consommation propre	domestic
2	2019-01-24		5	10		4	2019-01-24	8h	2019-01-24	12h	2019-01-24	matin	1	Cricetomys_emini	Mammalia	Rodentia	Nesomyidae	LC	Class C	1.3	Piège	Jeune	Frais	Masculin	Consommation propre	domestic
2	2019-01-05		5	10		5	2019-01-05	7h	2019-01-05	12h	2019-01-05	matin	1	Herpestes_naso	Mammalia	Carnivora	Herpestidae	LC	Class C	2.9	Piège	Jeune	Frais	Feménin	Vendu	selling	Voisin
2	2019-02-17		5	10		5	2019-02-17	7	2019-02-17	12		matin	1	Herpestes_naso	Mammalia	Carnivora	Herpestidae	LC	Class C	2.9	Piège	Adulte	Frais	Feménin	Consommation propre et Vendu	both
2	2019-02-08		5	10		9	2019-02-08	7	2019-02-08	16		matin	1	Mandrillus_sphinx	Mammalia	Primates	Cercopithecidae	VU	Class A	18.25	Fusil	Adulte	Frais	Masculin	Consommation propre et Vendu	both
2	2018-11-01		5	10		5	2018-11-01	7	2018-11-01	12	2018-11-01	matin	1	Nandinia_binotata	Mammalia	Carnivora	Nandiniidae	LC	Class C	2	Piège	Adulte	Frais	Masculin	Vendu	selling	Passant
2	2018-11-19		5	10		5	2018-11-19	7	2018-11-19	12	2018-11-19	matin	1	Nandinia_binotata	Mammalia	Carnivora	Nandiniidae	LC	Class C	2	Piège	Jeune	Frais	Feménin	Consommation propre	domestic
2	2019-01-19		5	10		5	2019-01-19	8h	2019-01-19	13h	2019-01-19	matin	1	Nandinia_binotata	Mammalia	Carnivora	Nandiniidae	LC	Class C	2	Piège	Adulte	Frais	Feménin	Consommation propre	domestic
2	2018-10-20		5	10		3	2018-10-20	12	2018-10-20	15	2018-10-20	soir	1	Phataginus_spp.	Mammalia	Pholidota	Manidae	VU/EN	Class C	2.425	Piège	Jeune	Vivant		Vendu	selling	Voisin
2	2018-10-28		5	10		4	2018-10-28	7	2018-10-28	11	2018-10-28	matin	1	Phataginus_spp.	Mammalia	Pholidota	Manidae	VU/EN	Class C	2.425	Piège	Adulte	Vivant	Feménin	Consommation propre et Vendu	both	Voisin
2	2018-11-12		5	10		3	2018-11-12	12	2018-11-12	15	2018-11-12	jour	1	Phataginus_spp.	Mammalia	Pholidota	Manidae	VU/EN	Class C	2.425	Piège	Jeune	Vivant	Feménin	Vendu	selling	Voisin
2	2018-11-19		5	10		5	2018-11-19	7	2018-11-19	12	2018-11-19	matin	1	Phataginus_spp.	Mammalia	Pholidota	Manidae	VU/EN	Class C	2.425	Piège	Adulte	Vivant	Feménin	Vendu	selling	Voisin
2	2018-11-22		5	10			2018-11-22	9	2018-11-22	9h	2018-11-22	matin	1	Phataginus_spp.	Mammalia	Pholidota	Manidae	VU/EN	Class C	2.425	Piège	Jeune	Vivant	Feménin	Vendu	selling	Passant
2	2018-12-01		5	10		4	2018-12-01	11	2018-12-01	15	2018-12-01	jour	1	Phataginus_spp.	Mammalia	Pholidota	Manidae	VU/EN	Class C	2.425	Piège	Adulte	Vivant	Masculin	Vendu	selling	Voisin
2	2018-12-30		5	10		5	2018-12-30	7h	2018-12-30	12h	2018-12-30	matin	1	Phataginus_spp.	Mammalia	Pholidota	Manidae	VU/EN	Class C	2.425	Piège	Jeune	Vivant		Consommation propre	domestic
2	2019-02-23		5	10		6	2019-02-23	6	2019-02-23	12		matin	1	Phataginus_spp.	Mammalia	Pholidota	Manidae	VU/EN	Class C	2.425	Piège	Adulte	Vivant	Feménin	Consommation propre	domestic
2	2018-12-23		5	10		5	2018-12-23	6h	2018-12-23	11h	2018-12-23	matin	1	Philantomba_monticola	Mammalia	Artiodactyla	Bovidae	LC	Class C	6.25	Piège	Adulte	Frais	Masculin	Consommation propre	domestic
2	2019-01-12		5	10		5	2019-01-12	6h	2019-01-12	11h	2019-01-12	matin	1	Philantomba_monticola	Mammalia	Artiodactyla	Bovidae	LC	Class C	6.25	Piège	Adulte	Frais	Feménin	Vendu	selling	Voisin
2	2019-01-13		5	10		4	2019-01-13	12h	2019-01-13	16h	2019-01-13	jour	1	Philantomba_monticola	Mammalia	Artiodactyla	Bovidae	LC	Class C	6.25	Piège	Adulte	Frais	Feménin	Vendu	selling	Voisin
2	2019-01-19		5	10		5	2019-01-19	8h	2019-01-19	13h	2019-01-19	matin	1	Philantomba_monticola	Mammalia	Artiodactyla	Bovidae	LC	Class C	6.25	Piège	Adulte	Décomposé	Masculin	Consommation propre	domestic
2	2019-02-02		5	10		53	2019-01-31	9	2019-02-02	14		nuit	1	Philantomba_monticola	Mammalia	Artiodactyla	Bovidae	LC	Class C	6.25	Fusil	Jeune	Boucané	Masculin	À vendre	selling
2	2019-02-02		5	10		53	2019-01-31	9	2019-02-02	14		nuit	1	Philantomba_monticola	Mammalia	Artiodactyla	Bovidae	LC	Class C	6.25	Fusil	Adulte	Boucané		À vendre	selling
2	2019-02-02		5	10		53	2019-01-31	9	2019-02-02	14		matin	1	Tragelaphus_spekeii	Mammalia	Artiodactyla	Bovidae	LC	Class B	78	Fusil	Jeune	Frais		Consommation propre et Vendu	both
2	2018-12-05		5	10		4	2018-12-05	11	2018-12-05	15	2018-12-05	jour	1	Varanus_ornatus	Reptilia	Squamata	Varanidae	VU	Class B		Piège	Adulte	Frais	Feménin	Consommation propre et Vendu	both	Voisin
2	2018-10-23		5	10		5	2018-10-23	11	2018-10-23	16			-1
2	2018-11-03		5	10		4	2018-11-03	9	2018-11-03	13			-1
2	2018-12-28		5	10		3	2018-12-28	12h	2018-12-28	15h			-1
2	2019-01-27		5	10		7	2019-01-27	8h	2019-01-27	15h	2019-01-27	jour	-1
2	2019-02-14		5	10		7	2019-02-14	7	2019-02-14	14			-1
2	2019-02-20		5	10		5	2019-02-20	6	2019-02-20	11			-1
2	2019-02-26		5	10		6	2019-02-26	6	2019-02-26	12			-1
2	2018-10-17		5	10		4	2018-10-17	10	2018-10-17	14			-1
2	2018-10-18		5	10		4	2018-10-18	11	2018-10-18	15			-1
2	2018-10-26		5	10		5	2018-10-26	9	2018-10-26	14			-1
2	2018-12-25		5	10		5	2018-12-25	7h	2018-12-25	12h			-1
2	2019-01-02		5	10		8	2019-01-02	8h	2019-01-02	16h		rien	-1
2	2019-01-31		5	10									-1
2	2019-02-01		5	10									-1
8	2019-01-19		7	11		5	2019-01-19	8h	2019-01-19	13h	2019-01-19	matin	1	Bitis_gabonica	Reptilia	Squamata	Viperidae	LC	Class C	3.5	Autre	Adulte	Frais	?	Consommation propre	domestic
8	2019-01-20		7	11		3	2019-01-20	8h	2019-01-20	11h	2019-01-20	matin	1	Cercopithecus_cephus	Mammalia	Primates	Cercopithecidae	LC	Class C	3.485	Autre	Adulte	Décomposé	Feménin	Consommation propre	domestic
8	2018-10-20		7	11		2	2018-10-20	8	2018-10-20	10	2018-10-20	matin	1	Cricetomys_emini	Mammalia	Rodentia	Nesomyidae	LC	Class C	1.3	Autre	Adulte	Frais	Feménin	Consommation propre	domestic
8	2019-01-07		7	11		5	2019-01-07	7h	2019-01-07	12h	2019-01-07	matin	1	Cricetomys_emini	Mammalia	Rodentia	Nesomyidae	LC	Class C	1.3	Autre	Adulte	Frais	Feménin	Consommation propre	domestic
8	2019-01-07		7	11		5	2019-01-07	7h	2019-01-07	12h	2019-01-07	matin	1	Cricetomys_emini	Mammalia	Rodentia	Nesomyidae	LC	Class C	1.3	Autre	Jeune	Frais	Masculin	Consommation propre	domestic
8	2019-02-15		7	11		8	2019-02-15	8	2019-02-15	16		soir	1	Hyemoschus_aquaticus	Mammalia	Artiodactyla	Tragulidae	LC	Class C	10.85	Piège	Adulte	Frais	Feménin	Consommation propre et Vendu	both	Voisin
8	2018-10-22		7	11		6	2018-10-22	6	2018-10-22	12	2018-10-22	matin	1	Varanus_ornatus	Reptilia	Squamata	Varanidae	VU	Class B		Piège	Adulte			Consommation propre et Vendu	both
8	2019-01-17		7	11									-1
6	2018-05-18	5	10	12		11	2018-05-18	8h	2018-05-18	19h	2018-05-18	soir	1	Atherurus_africanus	Mammalia	Rodentia	Hystricidae	LC	Class C	1.93	Piège	Adulte	Décomposé		consommation propre	domestic
6	2018-05-30	5	10	12		10	2018-05-30	8h	2018-05-30	18h	2018-05-30	matin	1	Atherurus_africanus	Mammalia	Rodentia	Hystricidae	LC	Class C	1.93	Piège	Adulte	Frais		vendu	selling	Bantou
6	2018-06-22	6	10	12		7	2018-06-22	8h	2018-06-22	15h	2018-06-22	Soir	1	Cephalophus_callipygus	Mammalia	Artiodactyla	Bovidae	LC	Class B	18.25	Piège	Adulte	Frais		Consommation propre et Vendu	both	Bantou
6	2018-06-26	6	10	12		11	2018-06-26	7h	2018-06-26	18h	2018-06-26	matin	1	Cephalophus_callipygus	Mammalia	Artiodactyla	Bovidae	LC	Class B	18.25	Piège	Adulte	Frais		Consommation propre et Vendu	both	Bantou
6	2018-07-07	7	10	12		10	2018-07-07	6h	2018-07-07	16h	2018-07-07	matin	1	Cephalophus_dorsalis	Mammalia	Artiodactyla	Bovidae	NT	Class B	20
6	2018-07-20	7	10	12		12	2018-07-20	6h	2018-07-20	18h	2018-07-20	11h	1	Cephalophus_dorsalis	Mammalia	Artiodactyla	Bovidae	NT	Class B	20	Piège	Adulte	Frais		Consommation propre et Vendu	both	Bantou
6	2018-07-24	7	10	12		10	2018-07-24	6h	2018-07-24	16h	2018-07-24	11h	1	Cephalophus_dorsalis	Mammalia	Artiodactyla	Bovidae	NT	Class B	20	Piège	Adulte	Frais		Consommation propre et vendu	both	Bantou
6	2018-06-01	6	10	12		11	2018-06-01	7h	2018-06-01	18h	2018-06-01	soir	1	Cercopithecus_cephus	Mammalia	Primates	Cercopithecidae	LC	Class C	3.485	Fusil	Adulte	Frais		consommation propre	domestic
6	2018-05-22	5	10	12		9	2018-05-22	9h	2018-05-22	18h	2018-05-22	soir	1	Cercopithecus_nictitans	Mammalia	Primates	Cercopithecidae	NT	Class C	5.41	Fusil	Adulte	Vivant		vendu	selling	Bantou
6	2018-06-01	6	10	12		11	2018-06-01	7h	2018-06-01	18h	2018-06-01	soir	1	Cercopithecus_nictitans	Mammalia	Primates	Cercopithecidae	NT	Class C	5.41	Fusil	Adulte	Frais		consommation propre	domestic
6	2018-06-19	6	10	12		10	2018-06-19	8h	2018-06-19	18h	2018-06-19	soir	1	Kinixys_erosa	Reptilia	Testudines	Testudinidae	DD	Class B	1.5	Autre	Adulte	Vivant		Consommation propre	domestic
6	2018-07-14	7	10	12		10	2018-07-14	6h	2018-07-14	16h	2018-07-14	10h	1	Nandinia_binotata	Mammalia	Carnivora	Nandiniidae	LC	Class C	2	Piège	Adulte	Décomposé		Consommation propre	domestic
6	2018-07-19	7	10	12		7	2018-07-19	11h	2018-07-19	18h	2018-07-19	14h	1	Nandinia_binotata	Mammalia	Carnivora	Nandiniidae	LC	Class C	2	Piège	Adulte	Frais		Consommation propre	domestic
6	2018-05-27	5	10	12		13	2018-05-27	5h	2018-05-27	18h	2018-05-27	soir	1	Phataginus_spp.	Mammalia	Pholidota	Manidae	VU/EN	Class C	2.425	Piège	Adulte	Frais		vendu	selling	Bantou
6	2018-07-02	7	10	12		9	2018-07-02	7h	2018-07-02	16h	2018-07-02	matin	1	Phataginus_spp.	Mammalia	Pholidota	Manidae	VU/EN	Class C	2.425	Piège	Adulte	Frais		Consommation propre	domestic
6	2018-05-14	5	10	12		10.5	2018-05-14	7h30	2018-05-14	18h	2018-05-14	soir	1	Philantomba_monticola	Mammalia	Artiodactyla	Bovidae	LC	Class C	6.25	Piège	Jeune	Vivant		vendu	selling	Bantou
6	2018-07-04	7	10	12		8	2018-07-04	8h	2018-07-04	16h	2018-07-04	Soir	1	Philantomba_monticola	Mammalia	Artiodactyla	Bovidae	LC	Class C	6.25	Piège	Adulte	Frais		Consommation propre et Vendu	both	Voisin
6	2018-07-17	7	10	12		12	2018-07-17	6h	2018-07-17	18h	2018-07-17	9h	1	Thryonomys_swinderianus	Mammalia	Rodentia	Thryonomyidae	LC	Class C	4.06	Piège	Adulte	Décomposé		Consommation propre	domestic
4	2018-03-24	3	2	13		6.5	2018-03-24	7h30	2018-03-24	14h	2018-03-24		1	Atherurus_africanus	Mammalia	Rodentia	Hystricidae	LC	Class C	1.93	Piège	Adulte	Frais		Consommation propre	domestic
4	2018-03-24	3	2	13		6.5	2018-03-24	7h30	2018-03-24	14h	2018-03-24	12h	1	Cephalophus_spp.	Mammalia	Artiodactyla	Bovidae	various	Class B	16.21	Autre	Adulte	Frais		Vendu	selling	Voisin
4	2018-03-29	3	2	13		7.5	2018-03-29	7h	2018-03-29	14h30	2018-03-29	11h	1	Cricetomys_emini	Mammalia	Rodentia	Nesomyidae	LC	CLass C	1.3	Autre	Adulte	Frais		Consommation propre	domestic
4	2018-04-12	4	2	13									1	Philantomba_monticola	Mammalia	Artiodactyla	Bovidae	LC	Class C	6.25	Piège	Jeune	Boucané		Consommation propre	domestic
3	2018-10-26		8	15		6	2018-10-26	6h30	2018-10-26	12h30	2018-10-26	matin	1	Atherurus_africanus	Mammalia	Rodentia	Hystricidae	LC	Class C	1.93	Piège	Adulte	Frais	Feménin	Vendu	selling
3	2018-11-17		8	15		7	2018-11-17	7h30	2018-11-17	14h30	2018-11-17		1	Cephalophus_dorsalis	Mammalia	Artiodactyla	Bovidae	NT	Class B	20	Piège	Adulte	Frais	Feménin	Consommation propre et Vendu	both	Voisin
3	2018-10-28		8	15			2018-10-28		2018-10-28				-1
3	2018-11-06		8	15		4.5	2018-11-06	5h30	2018-11-06	10			-1
10	2018-10-21		12	16		3	2018-10-21	7	2018-10-21	10	2018-10-21	matin	1	Atherurus_africanus	Mammalia	Rodentia	Hystricidae	LC	Class C	1.93	Piège	Jeune	Frais	Masculin	Consommation propre	domestic
10	2018-11-23		12	16		7	2018-11-23	6	2018-11-23	13	2018-11-23	matin	1	Atherurus_africanus	Mammalia	Rodentia	Hystricidae	LC	Class C	1.93	Autre	Jeune	Frais	Masculin	Consommation propre	domestic
10	2018-11-30		12	16		5	2018-11-30	8	2018-11-30	13	2018-11-30	matin	1	Atherurus_africanus	Mammalia	Rodentia	Hystricidae	LC	Class C	1.93	Chien	Adulte	Frais	Masculin	Vendu	selling
10	2018-10-25		12	16		4	2018-10-25	6	2018-10-25	10	2018-10-25	matin	1	Cephalophus_dorsalis	Mammalia	Artiodactyla	Bovidae	NT	Class B	20	Piège	Adulte	Frais	Feménin	Consommation propre et Vendu	both
10	2018-11-12		12	16		4	2018-11-12	6	2018-11-12	10	2018-11-12	matin	1	Cephalophus_dorsalis	Mammalia	Artiodactyla	Bovidae	NT	Class B	20	Piège		Frais	Feménin	Consommation propre et Vendu	both
10	2018-10-18		12	16		3	2018-10-18	6h30	2018-10-18	9h25	2018-10-18	matin	1	Cricetomys_emini	Mammalia	Rodentia	Nesomyidae	LC	Class C	1.3	Piège	Adulte	Frais	Masculin	Consommation propre	domestic
10	2018-11-14		12	16		4	2018-11-14	6	2018-11-14	10	2018-11-14	matin	1	Philantomba_monticola	Mammalia	Artiodactyla	Bovidae	LC	Class C	6.25	Piège	Adulte	Frais	Masculin	Consommation propre	domestic
10	2018-10-17		12	16		3	2018-10-17	6	2018-10-17	9h			-1
10	2018-10-22		12	16		3	2018-10-22	7h15	2018-10-22	10			-1
10	2018-10-30		12	16		2.5	2018-10-30	6	2018-10-30	8h30			-1
10	2018-11-03		12	16		2	2018-11-03	7	2018-11-03	9h			-1
10	2018-11-08		12	16			2018-11-08		2018-11-08				-1
10	2018-10-19		12	16		2.5	2018-10-19	7	2018-10-19	9h30			-1
10	2018-10-20		12	16		2.5	2018-10-20	6	2018-10-20	8h30			-1
10	2018-10-24		12	16		3	2018-10-24	6h30	2018-10-24	9h30			-1
10	2018-11-05		12	16									-1									Adulte
10	2018-11-18		6	17		9	2018-11-18	8	2018-11-18	17		matin	1	Cephalophus_dorsalis	Mammalia	Artiodactyla	Bovidae	NT	Class B	20	Fusil	Adulte	Frais	Feménin	Vendu	selling
10	2018-11-30		6	17		7	2018-11-30	10	2018-11-30	17	2018-11-30	soir	1	Cercopithecus_cephus	Mammalia	Primates	Cercopithecidae	LC	Class C	3.485	Fusil	Jeune	Frais	Feménin	Consommation propre	domestic
10	2018-12-24		6	17			2018-12-22	8h	2018-12-24		2018-12-23	matin	1	Lophocebus_albigena	Mammalia	Primates	Cercopithecidae	LC	Class C	7.69	Fusil	Adulte	Boucané	Masculin	À vendre	selling
10	2018-12-07		6	17		8	2018-12-07	10	2018-12-07	18	2018-12-07	soir	1	Mandrillus_sphinx	Mammalia	Primates	Cercopithecidae	VU	Class A	18.25	Fusil	Adulte	Frais	Masculin	Consommation propre et Vendu	both
10	2018-12-24		6	17			2018-12-22	8h	2018-12-24		2018-12-23	matin	1	Mandrillus_sphinx	Mammalia	Primates	Cercopithecidae	VU	Class A	18.25	Fusil	Jeune	Boucané	Masculin	Consommation propre	domestic
10	2018-12-24		6	17			2018-12-22	8h	2018-12-24		2018-12-23	matin	1	Mandrillus_sphinx	Mammalia	Primates	Cercopithecidae	VU	Class A	18.25	Fusil	Jeune	Boucané	Feménin	À vendre	selling
10	2019-01-17		6	17		154	2019-01-11	7h	2019-01-17	17h	2019-01-16	matin	1	Mandrillus_sphinx	Mammalia	Primates	Cercopithecidae	VU	Class A	18.25	Fusil	Jeune	Boucané	Masculin	À vendre	selling
10	2019-01-17		6	17		154	2019-01-11	7h	2019-01-17	17h	2019-01-16	matin	1	Mandrillus_sphinx	Mammalia	Primates	Cercopithecidae	VU	Class A	18.25	Fusil	Adulte	Boucané	Feménin	À vendre	selling
10	2019-01-17		6	17		154	2019-01-11	7h	2019-01-17	17h	2019-01-16	matin	1	Mandrillus_sphinx	Mammalia	Primates	Cercopithecidae	VU	Class A	18.25	Fusil	Adulte	Boucané	Masculin	À vendre	selling
10	2018-11-18		6	17		9	2018-11-18	8	2018-11-18	17		matin	1	Philantomba_monticola	Mammalia	Artiodactyla	Bovidae	LC	Class C	6.25	Fusil	Adulte	Frais	Masculin	Consommation propre	domestic
10	2018-10-29		6	17		8	2018-10-29	8	2018-10-29	16	2018-10-29	soir	1	Potamochoerus_porcus	Mammalia	Artiodactyla	Suidae	LC	Class B	70	Fusil	Adulte	Boucané	Masculin	Consommation propre et Vendu	both
10	2018-12-14		6	17		9	2018-12-14	6h	2018-12-14	17h	2018-12-14		-1
10	2018-12-22		6	17			2018-12-21	8h					-1
10	2018-12-23		6	17									-1
10	2019-01-11		6	17			2019-01-11	7h30					-1
10	2019-01-12		6	17									-1
10	2019-01-13		6	17									-1
10	2019-01-14		6	17									-1
10	2019-01-15		6	17									-1
3	2018-11-18		3	18		13	2018-11-18	6h40	2018-11-18	19h30	2018-11-18		1	Atherurus_africanus	Mammalia	Rodentia	Hystricidae	LC	Class C	1.93	Piège	Jeune	Frais	Feménin	Vendu	selling	Voisin
3	2018-10-25		3	18		8.5	2018-10-25	6h45	2018-10-25	15	2018-10-25	soir	1	Cephalophus_callipygus	Mammalia	Artiodactyla	Bovidae	LC	Class B	18.25	Piège	Adulte	Frais	Feménin	Vendu	selling
3	2018-11-02		3	18		11	2018-11-02	6h30	2018-11-02	17h30	2018-11-02	jour	1	Cephalophus_callipygus	Mammalia	Artiodactyla	Bovidae	LC	Class B	18.25	Piège	Adulte	Frais	Masculin	Consommation propre et à vendre	both
3	2018-11-05		3	18		10	2018-11-05	6	2018-11-05	16	2018-11-05	jour	1	Cephalophus_callipygus	Mammalia	Artiodactyla	Bovidae	LC	Class B	18.25	Piège	Adulte	Frais	Masculin	Consommation propre et à vendre	both
3	2018-11-08		3	18		56	2018-11-06	6h40	2018-11-08	14h30			1	Cephalophus_callipygus	Mammalia	Artiodactyla	Bovidae	LC	Class B	18.25	Piège	Adulte	Boucané	Masculin	À vendre	selling
3	2018-11-14		3	18		10.5	2018-11-14	6	2018-11-14	16h30	2018-11-14		1	Cephalophus_callipygus	Mammalia	Artiodactyla	Bovidae	LC	Class B	18.25	Piège	Adulte	Frais	Feménin	Consommation propre et Vendu	both	Passant
3	2018-12-02		3	18		8.5	2018-12-02	7	2018-12-02	15h30	2018-12-02	jour	1	Cephalophus_callipygus	Mammalia	Artiodactyla	Bovidae	LC	Class B	18.25	Piège	Adulte	Frais	Masculin	Consommation propre et Vendu	both	Passant
3	2019-01-10		3	18		8	2019-01-10	7h30	2019-01-10	15h30	2019-01-10	matin	1	Cephalophus_callipygus	Mammalia	Artiodactyla	Bovidae	LC	Class B	18.25	Piège	Adulte	Frais	Masculin	Consommation propre et Vendu	both	Voisin
3	2018-10-26		3	18		8.5	2018-10-26	6h30	2018-10-26	15	2018-10-26	soir	1	Cephalophus_dorsalis	Mammalia	Artiodactyla	Bovidae	NT	Class B	20	Piège	Adulte	Frais	Masculin	Consommation propre et Vendu	both
3	2018-10-27		3	18		6	2018-10-27	6h30	2018-10-27	12h30	2018-10-27	matin	1	Cephalophus_dorsalis	Mammalia	Artiodactyla	Bovidae	NT	Class B	20	Piège	Adulte	Frais	Feménin	Consommation propre et à vendre	both
3	2018-11-01		3	18		9	2018-11-01	7h20	2018-11-01	16h30	2018-11-01		1	Cephalophus_dorsalis	Mammalia	Artiodactyla	Bovidae	NT	Class B	20	Piège	Adulte		Masculin	Consommation propre et à vendre	both
3	2018-11-20		3	18		7	2018-11-20	7h30	2018-11-20	14h40	2018-11-20		1	Cephalophus_dorsalis	Mammalia	Artiodactyla	Bovidae	NT	Class B	20	Piège	Adulte	Frais	Feménin	Consommation propre et Vendu	both	Voisin
3	2018-11-27		3	18			2018-11-27	6h30	2018-11-27	1h30	2018-11-27		1	Cephalophus_dorsalis	Mammalia	Artiodactyla	Bovidae	NT	Class B	20	Piège	Adulte	Décomposé	Masculin	Consommation propre	domestic
3	2018-12-05		3	18		9	2018-12-05	7h30	2018-12-05	16h30	2018-12-05	jour	1	Cephalophus_dorsalis	Mammalia	Artiodactyla	Bovidae	NT	Class B	20	Piège	Adulte	Frais	Masculin	Consommation propre et Vendu	both	Voisin
3	2018-12-08		3	18		9.5	2018-12-08	7	2018-12-08	16h30	2018-12-08	jour	1	Cephalophus_dorsalis	Mammalia	Artiodactyla	Bovidae	NT	Class B	20	Piège	Jeune	Frais	Masculin	Consommation propre et Vendu	both	Voisin
3	2018-12-11		3	18		7	2018-12-11	8h30	2018-12-11	15h30	2018-12-11	matin	1	Cephalophus_dorsalis	Mammalia	Artiodactyla	Bovidae	NT	Class B	20	Piège	Adulte	Frais	Feménin	Consommation propre et Vendu	both	Passant
3	2018-12-27		3	18		8	2018-12-27	7h30	2018-12-27	15h30	27/2018	jour	1	Cephalophus_dorsalis	Mammalia	Artiodactyla	Bovidae	NT	Class B	20	Piège	Adulte	Frais	Masculin	Consommation propre et Vendu	both	Passant
3	2019-01-28		3	18		8	2019-01-28	8h30	2019-01-28	16h30	2019-01-28	matin	1	Cephalophus_dorsalis	Mammalia	Artiodactyla	Bovidae	NT	Class B	20	Piège	Jeune	Frais	Feménin	Consommation propre	domestic
3	2018-10-29		3	18		10.5	2018-10-29	7	2018-10-29	17h30	2018-10-29	jour	1	Philantomba_monticola	Mammalia	Artiodactyla	Bovidae	LC	Class C	6.25	Piège	Adulte	Frais	Feménin	Consommation propre et à vendre	both
3	2018-11-03		3	18		6.5	2018-11-03	7h30	2018-11-03	14	2018-11-03	matin	1	Philantomba_monticola	Mammalia	Artiodactyla	Bovidae	LC	Class C	6.25	Piège	Adulte	Frais	Masculin	À vendre	selling
3	2018-10-28		3	18		9	2018-10-28	7h30	2018-10-28	16h40			-1
3	2018-11-24		3	18		9	2018-11-24	7h30	2018-11-24	16h40			-1
3	2018-12-09		3	18		7	2018-12-09	8h30	2018-12-09	15h30			-1
3	2018-12-21		3	18		8	2018-12-21	7h30	2018-12-21	15h40			-1
10	2018-10-29		5	19		11	2018-10-29	6	2018-10-29	17	2018-10-29	matin	1	Cephalophus_callipygus	Mammalia	Artiodactyla	Bovidae	LC	Class B	18.25	Piège	Adulte	Décomposé	Feménin	Consommation propre et à vendre	both
10	2018-10-22		5	19		4	2018-10-22	9	2018-10-22	13	2018-10-22	matin	1	Cephalophus_dorsalis	Mammalia	Artiodactyla	Bovidae	NT	Class B	20	Fusil	Jeune	Frais	Feménin	Vendu	selling
10	2019-01-10		5	19		11	2019-01-10	19h	2019-01-10	6h	2019-01-10	nuit	1	Cephalophus_dorsalis	Mammalia	Artiodactyla	Bovidae	NT	Class B	20	Fusil	Jeune	Frais	Feménin	Vendu	selling	Revendeur/euse
10	2019-01-10		5	19		11	2019-01-10	19h	2019-01-10	6h	2019-01-10	nuit	1	Cephalophus_dorsalis	Mammalia	Artiodactyla	Bovidae	NT	Class B	20	Fusil		Frais	Masculin	Consommation propre et Vendu	both	Revendeur/euse
10	2018-11-26		5	19		33.5	2018-11-25	7h30	2018-11-26	17	2018-11-25	matin	1	Cephalophus_nigrifrons	Mammalia	Artiodactyla	Bovidae	LC	Class C	13.9	Piège	Jeune	Boucané	Feménin	À vendre	selling
10	2018-11-18		5	19		11	2018-11-18	6	2018-11-18	17		soir	1	Cephalophus_silvicultor	Mammalia	Artiodactyla	Bovidae	NT	Class A	72.5	Fusil	Adulte	Boucané	Masculin	Consommation propre et à vendre	both
10	2019-01-18		5	19		7	2019-01-18	7h	2019-01-18	14h	2019-01-18	soir	1	Cephalophus_silvicultor	Mammalia	Artiodactyla	Bovidae	NT	Class A	72.5	Fusil	Adulte	Frais	Feménin	Consommation propre et Vendu	both	Revendeur/euse
10	2018-11-08		5	19		6	2018-11-08	7	2018-11-08	13	2018-11-08	matin	1	Cercopithecus_nictitans	Mammalia	Primates	Cercopithecidae	NT	Class C	5.41	Fusil	Adulte	Frais	Masculin	Vendu	selling
10	2018-12-18		5	19		9	2018-12-18	9h	2018-12-18	18h	2018-12-18	matin	1	Cercopithecus_nictitans	Mammalia	Primates	Cercopithecidae	NT	Class C	5.41	Fusil	Jeune	Frais	Feménin	Consommation propre	domestic
10	2018-11-18		5	19		11	2018-11-18	6	2018-11-18	17		soir	1	Kinixys_erosa	Reptilia	Testudines	Testudinidae	DD	Class B	1.5	Autre	Jeune	Vivant	Feménin	Consommation propre	domestic
10	2018-11-26		5	19		33.5	2018-11-25	7h30	2018-11-26	17	2018-11-25	matin	1	Naja_nigricollis	Reptilia	Squamata	Elapidae	LC	Class B		Autre	Adulte	Frais		Consommation propre	domestic
10	2018-12-31		5	19		6	2018-12-31	8h	2018-12-31	14h	2018-12-31	matin	1	Perodicticus_edwardsi	Mammalia	Primates	Lorisidae	LC		0.8	Autre	Jeune	Frais	Feménin	Consommation propre	domestic
10	2018-11-08		5	19		6	2018-11-08	7	2018-11-08	13	2018-11-08	matin	1	Philantomba_monticola	Mammalia	Artiodactyla	Bovidae	LC	Class C	6.25	Fusil	Adulte	Frais	Feménin	Consommation propre	domestic
10	2018-12-18		5	19		9	2018-12-18	9h	2018-12-18	18h	2018-12-18	matin	1	Potamochoerus_porcus	Mammalia	Artiodactyla	Suidae	LC	Class B	70	Fusil	Adulte	Frais	Masculin	Consommation propre et Vendu	both	Revendeur/euse
10	2018-12-07		5	19		7	2018-12-07	6	2018-12-07	13			-1
10	2018-12-20		5	19		8	2018-12-20	16h	2018-12-20	24h			-1
10	2018-11-09		5	19		8	2018-11-09	8	2018-11-09	16			-1
10	2018-11-25		5	19			2018-11-25	7h30					-1
10	2018-12-22		5	19			2018-12-21	7h					-1
10	2018-12-23		5	19									-1
10	2018-12-24		5	19		53.5	2018-12-22	7h30	2018-12-24	13h	2018-12-24		-1
10	2019-02-26		5	19									-1
4	2018-03-15	3	5	20		12	2018-03-15	6h	2018-03-15	18h	2018-03-15	11h	1	Philantomba_monticola	Mammalia	Artiodactyla	Bovidae	LC	Class C	6.25	Piège	Adulte	Frais		Vendu	selling	Voisin
4	2018-03-15	3	5	20		12	2018-03-15	6h	2018-03-15	18h	2018-03-15		1	Philantomba_monticola	Mammalia	Artiodactyla	Bovidae	LC	Class C	6.25	Piège	Adulte	Frais		Consommation propre	domestic
10	2018-11-15		2	21		7	2018-11-15	7	2018-11-15	14	2018-11-15	matin	1	Cercopithecus_pogonias	Mammalia	Primates	Cercopithecidae	VU	Class C	3.25	Fusil	Adulte	Frais	Feménin	Vendu	selling
10	2019-02-16		2	21		24	2018-02-15	7	2019-02-16	7			-1
7	2018-03-06	3	8	22		34	2018-03-06	6h	2018-03-07	16h			1	Atherurus_africanus	Mammalia	Rodentia	Hystricidae	LC	Class C	1.93	Piège	Adulte	Frais		Vendu	selling	Revendeur/euse
7	2018-03-14	3	8	22		30	2018-03-13	9h	2018-03-14	15h	2018-03-13	12h	1	Cricetomys_emini	Mammalia	Rodentia	Nesomyidae	LC	CLass C	1.3	Piège	Adulte	Frais		Consommation propre	domestic
7	2018-03-19	3	8	22		9	2018-03-19	8h	2018-03-19	17h	2018-03-19	10h	1	Cricetomys_emini	Mammalia	Rodentia	Nesomyidae	LC	CLass C	1.3	Piège	Adulte	Frais		Consommation propre	domestic
7	2018-03-29	3	8	22		8	2018-03-29	8h	2018-03-29	16h	2018-03-29	10h	1	Cricetomys_emini	Mammalia	Rodentia	Nesomyidae	LC	CLass C	1.3	Piège	Adulte	Frais		Consommation propre	domestic
7	2018-04-04	4	8	22		7	2018-04-04	9h	2018-04-04	16h	2018-04-04	10h	1	Cricetomys_emini	Mammalia	Rodentia	Nesomyidae	LC	CLass C	1.3	Piège	Adulte	Frais		Consommation propre	domestic
7	2018-03-14	3	8	22		30	2018-03-13	9h	2018-03-14	15h	2018-03-13	11h	1	Kinixys_erosa	Reptilia	Testudines	Testudinidae	DD	Class B	1.5	Piège	Jeune	Frais		Consommation propre	domestic
7	2018-04-04	4	8	22		7	2018-04-04	9h	2018-04-04	16h	2018-04-04	10h	1	Naja_nigricollis	Reptilia	Squamata	Elapidae	LC	Class B		Piège	Adulte	Frais		Consommation propre	domestic
7	2018-03-10	3	8	22		29	2018-03-09	11h	2018-03-10	16h	2018-03-09	14h	1	Nandinia_binotata	Mammalia	Carnivora	Nandiniidae	LC	Class C	2	Piège	Adulte	Frais		Vendu	selling	Voisin
7	2018-03-06	3	8	22		34	2018-03-06	6h	2018-03-07	16h			1	Philantomba_monticola	Mammalia	Artiodactyla	Bovidae	LC	Class C	6.25	Piège	Adulte	Décomposé		Consommation propre	domestic
7	2018-03-14	3	8	22		30	2018-03-13	9h	2018-03-14	15h	2018-03-13	11h	1	Potamochoerus_porcus	Mammalia	Artiodactyla	Suidae	LC	Class B	70	Piège	Jeune	Frais		Consommation propre et Vendu	both	Revendeur/euse
7	2018-03-19	3	8	22		9	2018-03-19	8h	2018-03-19	17h	2018-03-19	10h	1	Thryonomys_swinderianus	Mammalia	Rodentia	Thryonomyidae	LC	Class C	4.06	Piège	Jeune	Décomposé		Consommation propre	domestic
7	2018-03-20	3	8	22		7	2018-03-20	8h	2018-03-20	15h			1	Thryonomys_swinderianus	Mammalia	Rodentia	Thryonomyidae	LC	Class C	4.06	Piège	Adulte	Frais		Consommation propre et Vendu	both	Voisin
7	2018-03-24	3	8	22		10	2018-03-24	7h	2018-03-24	17h	2018-03-24	9h	1	unspecified_mongoose	Mammalia	Carnivora	Herpestidae				Piège	Adulte	Frais		Consommation propre	domestic
7	2018-05-29	5	8	23		150	2018-05-23	9h	2018-05-29	15h	2018-05-29	Soir	1	Cephalophus_dorsalis	Mammalia	Artiodactyla	Bovidae	NT	Class B	20	Piège	Adulte	Frais		Consommation propre et À vendre	both
7	2018-06-23	6	8	23		8	2018-06-23	9h	2018-06-23	17h	2018-06-23	soir	1	Philantomba_monticola	Mammalia	Artiodactyla	Bovidae	LC	Class C	6.25	Piège	Adulte	Boucané		Consommation propre	domestic
7	2018-06-23	6	8	23		8	2018-06-23	9h	2018-06-23	17h	2018-06-23	soir	1	Philantomba_monticola	Mammalia	Artiodactyla	Bovidae	LC	Class C	6.25	Piège	Adulte	Boucané		Vendu	selling	Voisin
7	2018-05-23	5	8	23									-1
7	2018-05-25	5	8	23									-1
7	2018-05-26	5	8	23									-1
7	2018-05-27	5	8	23									-1
7	2018-05-28	5	8	23									-1
5	2018-05-12	5	2	24		2	2018-05-12	8h00	2018-05-12	12h14	2018-05-12		1	Philantomba_monticola	Mammalia	Artiodactyla	Bovidae	LC	Class C	6.25	Piège	Adulte	Frais		Consommation propre	domestic
8	2019-02-12		1	25		4	2019-02-12	8	2019-02-12	12		matin	1	Atilas_paludinosus	Mammalia	Carnivora	Herpestidae	LC	Class C	2.8	Piège	Adulte	Frais	Feménin	Consommation propre	domestic
8	2018-12-02		1	25		9	2018-12-02	6	2018-12-02	15	2018-12-02	matin	1	Bitis_gabonica	Reptilia	Squamata	Viperidae	LC	Class C	3.5	Autre	Adulte	Frais		Consommation propre	domestic
8	2019-02-16		1	25		4	2019-02-16	8	2019-02-16	12		matin	1	Bitis_gabonica	Reptilia	Squamata	Viperidae	LC	Class C	3.5	Autre	Adulte	Frais		Consommation propre	domestic
8	2019-01-25		1	25		9	2019-01-25	6h	2019-01-25	15h	2019-01-25	matin	1	Cephalophus_dorsalis	Mammalia	Artiodactyla	Bovidae	NT	Class B	20	Piège	Adulte	Décomposé	Feménin	Consommation propre	domestic
8	2018-12-30		1	25		81	2018-12-27	7h	2018-12-30	16h	2018-12-28		1	Cephalophus_silvicultor	Mammalia	Artiodactyla	Bovidae	NT	Class A	72.5	Piège	Adulte	Boucané	Feménin	Consommation propre	domestic
8	2019-01-13		1	25		5	2019-01-13	8h	2019-01-13	13h	2019-01-13	matin	1	Cricetomys_emini	Mammalia	Rodentia	Nesomyidae	LC	Class C	1.3	Autre	Adulte	Frais	Masculin	Consommation propre	domestic
8	2019-02-09		1	25		4	2019-02-09	8	2019-02-09	12		matin	1	Cricetomys_emini	Mammalia	Rodentia	Nesomyidae	LC	Class C	1.3	Autre	Adulte	Frais	Masculin	Consommation propre	domestic
8	2019-02-22		1	25		5	2019-02-22	8	2019-02-22	13		soir	1	Naja_nigricollis	Reptilia	Squamata	Elapidae	LC	Class B		Autre	Adulte	Frais		Consommation propre	domestic
8	2019-01-21		1	25		5	2019-01-21	8h	2019-01-21	13h	2019-01-21	matin	1	Neotragus_batesi	Mammalia	Artiodactyla	Bovidae	LC		3	Piège	Adulte	Frais	Feménin	Consommation propre	domestic
8	2018-12-02		1	25		9	2018-12-02	6	2018-12-02	15	2018-12-02	matin	1	Philantomba_monticola	Mammalia	Artiodactyla	Bovidae	LC	Class C	6.25	Piège	Adulte	Frais	Feménin	Vendu	selling
8	2018-12-13		1	25		57	2018-12-11	6h	2018-12-13	15h	2018-12-11		1	Potamochoerus_porcus	Mammalia	Artiodactyla	Suidae	LC	Class B	70	Piège	Adulte	Boucané	Feménin	Consommation propre et Vendu	both	Voisin
8	2018-11-18		1	25		74	2018-11-15	7	2018-11-18	9h			-1
8	2018-12-10		1	25		8	2018-12-10	8	2018-12-10	16			-1
8	2018-11-07		1	25			2018-11-07	7					-1
8	2018-11-15		1	25			2018-11-15	7					-1
8	2018-11-16		1	25									-1
8	2018-11-17		1	25									-1
8	2018-12-11		1	25			2018-12-11	6					-1
8	2018-12-27		1	25			2018-12-27	7h					-1
8	2018-12-28		1	25									-1
8	2018-12-29		1	25									-1
8	2018-12-13		7	26		53	2018-12-11	8h	2018-12-13	13h	2018-12-13	matin	1	Caracal_aurata	Mammalia	Carnivora	Felidae	VU	unknown	10.65	Piège	Adulte	Frais	Feménin	Consommation propre	domestic
8	2019-01-15		7	26		9	2019-01-15	7h	2019-01-15	18h	2019-01-15	matin	1	Cercocebus_agilis	Mammalia	Primates	Cercopithecidae	LC	Class A	8	Fusil	Adulte	Frais	Masculin	Vendu	selling	Voisin
8	2019-01-15		7	26		9	2019-01-15	7h	2019-01-15	18h	2019-01-15	matin	1	Cercopithecus_pogonias	Mammalia	Primates	Cercopithecidae	VU	Class C	3.25	Fusil	Adulte	Frais	Feménin	Vendu	selling	Voisin
8	2018-10-26		7	26		5	2018-10-26	7	2018-10-26	12	2018-10-26	matin	1	Cricetomys_emini	Mammalia	Rodentia	Nesomyidae	LC	Class C	1.3	Autre	Adulte	Frais	Masculin	Consommation propre	domestic
8	2018-11-15		7	26		3	2018-11-15	8	2018-11-15	11	2018-11-15		1	Cricetomys_emini	Mammalia	Rodentia	Nesomyidae	LC	Class C	1.3	Autre	Adulte	Frais	Feménin	Consommation propre	domestic
8	2018-11-15		7	26		3	2018-11-15	8	2018-11-15	11	2018-11-15		1	Cricetomys_emini	Mammalia	Rodentia	Nesomyidae	LC	Class C	1.3	Autre	Jeune	Frais	Feménin	Consommation propre	domestic
8	2019-02-02		7	26		4	2019-02-02	8	2019-02-02	12		matin	1	Cricetomys_emini	Mammalia	Rodentia	Nesomyidae	LC	Class C	1.3	Piège	Adulte	Frais	Feménin	Consommation propre	domestic
8	2018-11-19		7	26		4	2018-11-19	8	2018-11-19	12	2018-11-19	matin	1	Genetta_servalina	Mammalia	Carnivora	Herpestidae	LC	Class B	1.055	Piège	Adulte	Frais	Masculin	Consommation propre	domestic
8	2019-02-03		7	26		8	2019-02-03	7	2019-02-03	15		matin	1	Kinixys_erosa	Reptilia	Testudines	Testudinidae	DD	Class B	1.5	Autre	Adulte	Vivant		Consommation propre	domestic
8	2019-02-23		7	26		10	2019-02-23	7	2019-02-23	17		matin	1	Osteolaemus_tetraspis	Reptilia	Crocodilia	Crocodylidae	VU	Class A		Piège	Adulte	Vivant	Masculin	Vendu	selling	commerçant
8	2019-02-24		7	26		7	2019-02-24	8	2019-02-24	15		midi	1	Osteolaemus_tetraspis	Reptilia	Crocodilia	Crocodylidae	VU	Class A		Piège	Adulte	Vivant	Feménin	Vendu	selling	Revendeur/euse
8	2018-11-01		7	26		9	2018-11-01	7	2018-11-01	16	2018-11-01	jour	1	Philantomba_monticola	Mammalia	Artiodactyla	Bovidae	LC	Class C	6.25	Piège	Adulte	Frais	Masculin	Consommation propre	domestic
8	2019-02-24		7	26		7	2019-02-24	8	2019-02-24	15		matin	1	Philantomba_monticola	Mammalia	Artiodactyla	Bovidae	LC	Class C	6.25	Piège	Jeune	Décomposé	Feménin	Consommation propre	domestic
8	2018-10-26		7	26		5	2018-10-26	7	2018-10-26	12	2018-10-26	matin	1	Thryonomys_swinderianus	Mammalia	Rodentia	Thryonomyidae	LC	Class C	4.06	Piège	Adulte	Frais	Feménin	Vendu	selling
8	2018-12-31		7	26			2018-12-31		2018-12-31		2018-12-31	matin	1	Thryonomys_swinderianus	Mammalia	Rodentia	Thryonomyidae	LC	Class C	4.06	Piège	Adulte	Frais	Feménin	Consommation propre	domestic
8	2019-02-06		7	26		6	2019-02-06	7	2019-02-06	13		matin	1	Thryonomys_swinderianus	Mammalia	Rodentia	Thryonomyidae	LC	Class C	4.06	Piège	Adulte	Décomposé	Masculin	Consommation propre	domestic
8	2019-01-08		7	26		10	2019-01-08	6h	2019-01-08	16h			-1
8	2019-01-21		7	26			2019-01-21		2019-01-21			rien	-1
8	2018-12-11		7	26			2018-12-11	6					-1
8	2018-12-29		7	26		5	2018-12-29	7h	2018-12-29	12h			-1
8	2018-11-01		3	27									-1
8	2018-11-02		3	27									-1
8	2018-11-03		3	27									-1
8	2018-12-06		2	28		10	2018-12-06	7	2018-12-06	17	2018-12-06	matin	1	Agelastes_niger	Aves	Galliformes	Numididae		Class C		Piège	Adulte	Décomposé		Consommation propre	domestic
8	2018-12-02		2	28		6	2018-12-02	8	2018-12-02	14	2018-12-02	matin	1	Atherurus_africanus	Mammalia	Rodentia	Hystricidae	LC	Class C	1.93	Piège	Jeune	Frais	Masculin	Vendu	selling
8	2018-12-20		2	28		10	2018-12-20	7h	2018-12-20	17h	2018-12-20	matin	1	Atherurus_africanus	Mammalia	Rodentia	Hystricidae	LC	Class C	1.93	Piège	Adulte	Décomposé	Masculin	Consommation propre	domestic
8	2019-01-03		2	28		10	2019-01-03	6h	2019-01-03	16h	2019-01-03	matin	1	Atherurus_africanus	Mammalia	Rodentia	Hystricidae	LC	Class C	1.93	Piège	Adulte	Frais	Masculin	Vendu	selling	Voisin
8	2019-01-11		2	28		15	2019-01-11	8h	2019-01-11	23h	2019-01-11	nuit	1	Atherurus_africanus	Mammalia	Rodentia	Hystricidae	LC	Class C	1.93	Fusil	Jeune	Frais	Feménin	Consommation propre	domestic
8	2019-02-23		2	28		56	2019-02-21	7	2019-02-23	15	2019-02-21	soir	1	Atherurus_africanus	Mammalia	Rodentia	Hystricidae	LC	Class C	1.93	Piège	Adulte	Boucané	Masculin	Consommation propre	domestic
8	2018-12-02		2	28		6	2018-12-02	8	2018-12-02	14	2018-12-02	matin	1	Bdeogale_nigripes	Mammalia	Carnivora	Herpestidae	LC	Class C	2.5	Piège	Adulte	Décomposé	Masculin	Consommation propre	domestic
8	2018-10-25		2	28		9	2018-10-25	6	2018-10-25	15	2018-10-25	matin	1	Cephalophus_dorsalis	Mammalia	Artiodactyla	Bovidae	NT	Class B	20	Piège	Adulte	Frais	Masculin	Consommation propre et Vendu	both
8	2018-11-01		2	28		5	2018-11-01	7	2018-11-01	12	2018-11-01	matin	1	Cephalophus_dorsalis	Mammalia	Artiodactyla	Bovidae	NT	Class B	20	Piège	Adulte	Frais	Masculin	Consommation propre et à vendre	both
8	2018-12-29		2	28		7	2018-12-29	7h	2018-12-29	14h	2018-12-29	matin	1	Cephalophus_dorsalis	Mammalia	Artiodactyla	Bovidae	NT	Class B	20	Piège	Adulte	Frais	Masculin	Consommation propre et Vendu	both	Voisin
8	2019-01-14		2	28		7	2019-01-14	17h	2019-01-14	24h	2019-01-14	nuit	1	Cephalophus_dorsalis	Mammalia	Artiodactyla	Bovidae	NT	Class B	20	Fusil	Adulte	Frais	Masculin	Vendu	selling	Revendeur/euse
8	2019-02-23		2	28		56	2019-02-21	7	2019-02-23	15	2019-02-21	soir	1	Cephalophus_dorsalis	Mammalia	Artiodactyla	Bovidae	NT	Class B	20	Piège	Adulte	Boucané	Feménin	Consommation propre et Vendu	both	Voisin
8	2019-01-22		2	28		6	2019-01-22	13h	2019-01-22	19h	2019-01-22	soir	1	Cephalophus_leucogaster	Mammalia	Artiodactyla	Bovidae	NT	unknown	12.7	Piège	Adulte	Frais	Masculin	Consommation propre et Vendu	both	Voisin
8	2018-11-21		2	28		9	2018-11-21	8	2018-11-21	17	2018-11-21	soir	1	Cephalophus_nigrifrons	Mammalia	Artiodactyla	Bovidae	LC	Class C	13.9	Piège	Adulte	Décomposé	Feménin	Consommation propre et Vendu	both
8	2018-11-16		2	28		11	2018-11-16	7	2018-11-16	18	2018-11-16	matin	1	Cephalophus_silvicultor	Mammalia	Artiodactyla	Bovidae	NT	Class A	72.5	Piège	Adulte	Frais	Masculin	Consommation propre et Vendu	both
8	2018-12-14		2	28		80	2018-12-11	8h	2018-12-14	16h	2018-12-12	soir	1	Cephalophus_silvicultor	Mammalia	Artiodactyla	Bovidae	NT	Class A	72.5	Piège	Adulte	Frais	Feménin	Consommation propre et Vendu	both	Voisin
8	2019-01-03		2	28		10	2019-01-03	6h	2019-01-03	16h	2019-01-03	matin	1	Cephalophus_silvicultor	Mammalia	Artiodactyla	Bovidae	NT	Class A	72.5	Piège	Adulte	Décomposé	Feménin	Consommation propre	domestic
8	2019-02-17		2	28		9	2019-02-17	7	2019-02-17	16		matin	1	Cephalophus_silvicultor	Mammalia	Artiodactyla	Bovidae	NT	Class A	72.5	Piège	Adulte	Frais	Masculin	Consommation propre et Vendu	both	Voisin
8	2019-01-29		2	28		4	2019-01-29	12h	2019-01-29	18h	2019-01-29	soir	1	Cercopithecus_cephus	Mammalia	Primates	Cercopithecidae	LC	Class C	3.485	Fusil	Adulte	Frais	Masculin	Vendu	selling	Voisin
8	2018-12-06		2	28		10	2018-12-06	7	2018-12-06	17	2018-12-06	matin	1	Cercopithecus_nictitans	Mammalia	Primates	Cercopithecidae	NT	Class C	5.41	Autre	Jeune	Frais	Feménin	Consommation propre	domestic
8	2019-01-17		2	28		9	2019-01-17	8h	2019-01-17	17h	2019-01-17	matin	1	Cercopithecus_nictitans	Mammalia	Primates	Cercopithecidae	NT	Class C	5.41	Fusil	Adulte	Frais	Feménin	Consommation propre et Vendu	both	Voisin
8	2019-01-17		2	28		9	2019-01-17	8h	2019-01-17	17h	2019-01-17	matin	1	Cercopithecus_pogonias	Mammalia	Primates	Cercopithecidae	VU	Class C	3.25	Fusil	Adulte	Frais	Masculin	Consommation propre	domestic
8	2019-01-27		2	28		7	2019-01-27	8h	2019-01-27	15h	2019-01-27	soir	1	Colobus_guereza	Mammalia	Primates	Cercopithecidae	LC	Class A	10.2	Fusil	Adulte	Frais	Masculin	Vendu	selling	Voisin
8	2019-02-14		2	28		4	2019-02-14	8	2019-02-14	12		matin	1	Cricetomys_emini	Mammalia	Rodentia	Nesomyidae	LC	Class C	1.3	Piège	Adulte	Frais	Feménin	Consommation propre	domestic
8	2018-12-16		2	28		10	2018-12-16	6h	2018-12-16	16h	2018-12-16	matin	1	Genetta_servalina	Mammalia	Carnivora	Herpestidae	LC	Class B	1.055	Piège	Adulte	Décomposé	Masculin
8	2018-10-25		2	28		9	2018-10-25	6	2018-10-25	15	2018-10-25	soir	1	Herpestes_naso	Mammalia	Carnivora	Herpestidae	LC	Class C	2.9	Piège	Adulte	Décomposé	Masculin	Consommation propre	domestic
8	2019-01-28		2	28		6	2019-01-28	12h	2019-01-28	18h	2019-01-28	soir	1	Herpestes_naso	Mammalia	Carnivora	Herpestidae	LC	Class C	2.9	Piège	Adulte	Frais	Masculin	Consommation propre	domestic
8	2019-02-09		2	28		9	2019-02-09	7	2019-02-09	16		soir	1	Herpestes_naso	Mammalia	Carnivora	Herpestidae	LC	Class C	2.9	Piège	Adulte	Décomposé	Feménin	Consommation propre	domestic
8	2019-01-03		2	28		10	2019-01-03	6h	2019-01-03	16h	2019-01-03	matin	1	Hyemoschus_aquaticus	Mammalia	Artiodactyla	Tragulidae	LC	Class C	10.85	Piège	Jeune	Frais	Feménin	Vendu	selling	Voisin
8	2018-10-29		2	28		8	2018-10-29	7	2018-10-29	15	2018-10-29	m	1	Kinixys_erosa	Reptilia	Testudines	Testudinidae	DD	Class B	1.5	Autre	Adulte	Vivant		Consommation propre	domestic
8	2018-11-16		2	28		11	2018-11-16	7	2018-11-16	18	2018-11-16	matin	1	Kinixys_erosa	Reptilia	Testudines	Testudinidae	DD	Class B	1.5	Autre	Adulte	Vivant		Consommation propre	domestic
8	2018-12-16		2	28		10	2018-12-16	6h	2018-12-16	16h	2018-12-16	matin	1	Kinixys_erosa	Reptilia	Testudines	Testudinidae	DD	Class B	1.5	Autre	Adulte	Vivant	?	Consommation propre	domestic
8	2019-01-22		2	28		6	2019-01-22	13h	2019-01-22	19h	2019-01-22	soir	1	Kinixys_erosa	Reptilia	Testudines	Testudinidae	DD	Class B	1.5	Autre	Adulte	Vivant	?	Consommation propre	domestic
8	2019-02-04		2	28		55	2019-02-02	8	2019-02-04	15	2019-02-04	matin	1	Osteolaemus_tetraspis	Reptilia	Crocodilia	Crocodylidae	VU	Class A		Piège	Adulte	Vivant	Feménin	Vendu	selling	Revendeur/euse
8	2018-12-14		2	28		80	2018-12-11	8h	2018-12-14	16h	2018-12-12	soir	1	Philantomba_monticola	Mammalia	Artiodactyla	Bovidae	LC	Class C	6.25	Piège	Jeune	Boucané	Feménin	Consommation propre	domestic
8	2018-12-24		2	28		34	2018-12-23	5h	2018-12-24	15h	2018-12-24	matin	1	Philantomba_monticola	Mammalia	Artiodactyla	Bovidae	LC	Class C	6.25	Piège	Adulte	Frais	Masculin	Consommation propre	domestic
8	2018-12-29		2	28		7	2018-12-29	7h	2018-12-29	14h	2018-12-29	matin	1	Philantomba_monticola	Mammalia	Artiodactyla	Bovidae	LC	Class C	6.25	Piège	Jeune	Décomposé	Masculin	Consommation propre	domestic
8	2019-01-11		2	28		15	2019-01-11	8h	2019-01-11	23h	2019-01-11	nuit	1	Philantomba_monticola	Mammalia	Artiodactyla	Bovidae	LC	Class C	6.25	Fusil	Adulte	Frais	Masculin	Vendu	selling	Voisin
8	2019-02-04		2	28		55	2019-02-02	8	2019-02-04	15	2019-02-02	soir	1	Philantomba_monticola	Mammalia	Artiodactyla	Bovidae	LC	Class C	6.25	Piège	Adulte	Boucané	Masculin	Vendu	selling	Voisin
8	2019-02-04		2	28		55	2019-02-02	8	2019-02-04	15	2019-02-02	soir	1	Tragelaphus_spekeii	Mammalia	Artiodactyla	Bovidae	LC	Class B	78	Piège	Adulte	Boucané	Feménin	Consommation propre et Vendu	both	Voisin
8	2018-10-17		2	28		8	2018-10-17	7	2018-10-17	15			-1
8	2018-10-18		2	28		9	2018-10-18	7	2018-10-18	16			-1
8	2018-11-30		2	28		10	2018-11-30	7	2018-11-30	17			-1
8	2019-01-19		2	28		4	2019-01-19	8h	2019-01-19	12h		rien	-1
8	2019-01-20		2	28		6	2019-01-20	7h	2019-01-20	13h		rien	-1
8	2019-01-25		2	28		7	2019-01-25	7h	2019-01-25	14h		rien	-1
8	2019-01-31		2	28		9	2019-01-31	7	2019-01-31	16			-1
8	2019-02-19		2	28		8	2019-02-19	7	2019-02-19	15			-1
8	2018-10-20		2	28		5	2018-10-20	7	2018-10-20	12			-1
8	2018-12-11		2	28			2018-12-11	8					-1
8	2018-12-13		2	28			2018-12-13	8h					-1
8	2018-12-22		2	28			2018-12-22	5h					-1
8	2019-01-07		2	28		5	2019-01-07	7h	2019-01-07	12h			-1
8	2019-01-15		2	28		16	2019-01-15	16h	2019-01-16	8h		rien	-1
8	2019-02-02		2	28									-1
8	2019-02-03		2	28									-1
8	2019-02-21		2	28									-1
8	2019-02-22		2	28									-1
4	2018-03-13	3	3	30		9	2018-03-13	7h	2018-03-13	16h	2018-03-13	12h	1	Atherurus_africanus	Mammalia	Rodentia	Hystricidae	LC	Class C	1.93	Autre	Adulte	Frais		Vendu	selling	Voisin
4	2018-03-20	3	3	30		3	2018-03-20	7h	2018-03-20	10h	2018-03-20	9h	1	Atherurus_africanus	Mammalia	Rodentia	Hystricidae	LC	Class C	1.93	Chien	Adulte	Frais		Vendu	selling	Voisin
2	2018-11-03		6	31		180	2018-10-27	7	2018-11-03	19		jour	1	Atherurus_africanus	Mammalia	Rodentia	Hystricidae	LC	Class C	1.93	Piège	Adulte	Boucané	Feménin	Consommation propre	domestic
2	2018-11-15		6	31		104	2018-11-11	7	2018-11-15	15		jour	1	Atherurus_africanus	Mammalia	Rodentia	Hystricidae	LC	Class C	1.93	Piège	Jeune	Boucané	Masculin	Consommation propre et Vendu	both	Voisin
2	2018-12-13		6	31		49	2018-12-11	13h	2018-12-13	14h	2018-12-12	soir	1	Atherurus_africanus	Mammalia	Rodentia	Hystricidae	LC	Class C	1.93	Piège	Adulte	Boucané	Feménin	Vendu	selling	Voisin
2	2018-12-28		6	31		37	2018-12-27	6h	2018-12-28	19h		matin	1	Atherurus_africanus	Mammalia	Rodentia	Hystricidae	LC	Class C	1.93	Piège	Jeune	Frais	Masculin	Consommation propre	domestic
2	2019-02-02		6	31		53	2019-01-31	9	2019-02-02	14		matin	1	Atherurus_africanus	Mammalia	Rodentia	Hystricidae	LC	Class C	1.93	Piège	Adulte	Frais	Feménin	Consommation propre	domestic
2	2019-02-12		6	31		5	2019-02-12	8	2019-02-12	13		jour	1	Atherurus_africanus	Mammalia	Rodentia	Hystricidae	LC	Class C	1.93	Piège	Adulte	Frais	Masculin	Vendu	selling
2	2018-11-25		6	31		32	2018-11-24	7	2018-11-25	15	2018-11-25	matin	1	Cephalophus_callipygus	Mammalia	Artiodactyla	Bovidae	LC	Class B	18.25	Piège	Adulte	Décomposé	Masculin	Consommation propre	domestic
2	2018-10-23		6	31		130	2018-10-18	6	2018-10-23	16			1	Cephalophus_dorsalis	Mammalia	Artiodactyla	Bovidae	NT	Class B	20	Fusil	Adulte	Boucané	Feménin	Consommation propre	domestic
2	2018-11-15		6	31		104	2018-11-11	7	2018-11-15	15		matin	1	Cephalophus_dorsalis	Mammalia	Artiodactyla	Bovidae	NT	Class B	20	Piège	Adulte	Boucané	Feménin	Consommation propre et Vendu	both	Voisin
2	2018-12-13		6	31		49	2018-12-11	13h	2018-12-13	14h	2018-12-12	nuit	1	Cephalophus_dorsalis	Mammalia	Artiodactyla	Bovidae	NT	Class B	20	Fusil	Jeune	Boucané	Masculin	Consommation propre	domestic	Voisin
2	2019-01-22		6	31		28	2019-01-21	7h	2019-01-22	11h	2019-01-22	nuit	1	Cephalophus_dorsalis	Mammalia	Artiodactyla	Bovidae	NT	Class B	20	Fusil	Adulte	Frais	Feménin	Consommation propre	domestic
2	2019-02-02		6	31		53	2019-01-31	9	2019-02-02	14		jour	1	Cephalophus_dorsalis	Mammalia	Artiodactyla	Bovidae	NT	Class B	20	Piège	Adulte	Boucané	Feménin	Consommation propre et Vendu	both
2	2019-02-17		6	31		73	2019-02-14	6	2019-02-17	7		matin	1	Cephalophus_dorsalis	Mammalia	Artiodactyla	Bovidae	NT	Class B	20	Piège	Adulte	Boucané	Masculin	Consommation propre et Vendu	both
2	2019-02-24		6	31		49	2019-02-22	13	2019-02-24	14		nuit	1	Cephalophus_dorsalis	Mammalia	Artiodactyla	Bovidae	NT	Class B	20	Fusil	Adulte	Boucané	Masculin
2	2018-11-19		6	31		5	2018-11-19	8	2018-11-19	13	2018-11-19	matin	1	Cercopithecus_cephus	Mammalia	Primates	Cercopithecidae	LC	Class C	3.485	Fusil	Jeune	Frais	Masculin	Consommation propre	domestic
2	2018-11-23		6	31		16	2018-11-22	19	2018-11-23	11	2018-11-22	matin	1	Cercopithecus_cephus	Mammalia	Primates	Cercopithecidae	LC	Class C	3.485	Fusil	Adulte	Frais	Masculin	Consommation propre	domestic
2	2018-11-30		6	31		10	2018-11-30	7	2018-11-30	17	2018-11-30	jour	1	Cercopithecus_cephus	Mammalia	Primates	Cercopithecidae	LC	Class C	3.485	Fusil	Adulte	Frais	Feménin	Consommation propre	domestic
2	2018-12-13		6	31		49	2018-12-11	13h	2018-12-13	14h	2018-12-12	matin	1	Cercopithecus_cephus	Mammalia	Primates	Cercopithecidae	LC	Class C	3.485	Fusil	Adulte	Boucané	Masculin	Consommation propre	domestic	Voisin
2	2019-01-15		6	31		95	2019-01-11	7h	2019-01-15	6h	2019-01-15	soir	1	Cercopithecus_cephus	Mammalia	Primates	Cercopithecidae	LC	Class C	3.485	Fusil	Adulte	Boucané	Masculin	À vendre	selling
2	2019-01-15		6	31		95	2019-01-11	7h	2019-01-15	6h	2019-01-15	soir	1	Cercopithecus_cephus	Mammalia	Primates	Cercopithecidae	LC	Class C	3.485	Fusil		Boucané	Feménin	À vendre	selling
2	2019-01-15		6	31		95	2019-01-11	7h	2019-01-15	6h	2019-01-15	soir	1	Cercopithecus_cephus	Mammalia	Primates	Cercopithecidae	LC	Class C	3.485	Fusil	Jeune	Boucané	Feménin	À vendre	selling
2	2019-01-22		6	31		28	2019-01-21	7h	2019-01-22	11h	2019-01-22	jour	1	Cercopithecus_cephus	Mammalia	Primates	Cercopithecidae	LC	Class C	3.485	Fusil	Jeune	Frais	Masculin	Consommation propre	domestic
2	2019-01-25		6	31		3	2019-01-25	9h	2019-01-25	12h	2019-01-25	matin	1	Cercopithecus_cephus	Mammalia	Primates	Cercopithecidae	LC	Class C	3.485	Fusil	Jeune	Frais	Masculin	Consommation propre et Vendu	both
2	2018-11-19		6	31		5	2018-11-19	8	2018-11-19	13	2018-11-19	matin	1	Cercopithecus_nictitans	Mammalia	Primates	Cercopithecidae	NT	Class C	5.41	Fusil	Jeune	Frais	Feménin	Consommation propre	domestic
2	2018-11-19		6	31		5	2018-11-19	8	2018-11-19	13	2018-11-19	matin	1	Cercopithecus_nictitans	Mammalia	Primates	Cercopithecidae	NT	Class C	5.41	Fusil	Adulte	Frais	Masculin	Consommation propre	domestic
2	2018-11-26		6	31		6	2018-11-26	7	2018-11-26	13	2018-11-26	matin	1	Cercopithecus_nictitans	Mammalia	Primates	Cercopithecidae	NT	Class C	5.41	Fusil	Adulte	Frais	Masculin	Consommation propre	domestic
2	2018-11-30		6	31		10	2018-11-30	7	2018-11-30	17	2018-11-30	jour	1	Cercopithecus_nictitans	Mammalia	Primates	Cercopithecidae	NT	Class C	5.41	Fusil	Jeune	Frais	Masculin	Consommation propre	domestic
2	2019-01-15		6	31		95	2019-01-11	7h	2019-01-15	6h	2019-01-15	soir	1	Cercopithecus_nictitans	Mammalia	Primates	Cercopithecidae	NT	Class C	5.41	Fusil	Jeune	Boucané	Feménin	À vendre	selling
2	2018-11-25		6	31		32	2018-11-24	7	2018-11-25	15	2018-11-25	matin	1	Hyemoschus_aquaticus	Mammalia	Artiodactyla	Tragulidae	LC	Class C	10.85	Fusil	Adulte	Frais	Masculin	Consommation propre	domestic
2	2019-02-02		6	31		53	2019-01-31	9	2019-02-02	14		soir	1	Hyemoschus_aquaticus	Mammalia	Artiodactyla	Tragulidae	LC	Class C	10.85	Piège	Adulte	Boucané		Vendu	selling
2	2018-11-25		6	31		32	2018-11-24	7	2018-11-25	15	2018-11-25	matin	1	Lophocebus_albigena	Mammalia	Primates	Cercopithecidae	LC	Class C	7.69	Fusil	Jeune	Frais	Masculin	Consommation propre	domestic
2	2018-11-03		6	31		180	2018-10-27	7	2018-11-03	19		jour	1	Mandrillus_sphinx	Mammalia	Primates	Cercopithecidae	VU	Class A	18.25	Fusil	Adulte	Frais	Feménin	Consommation propre et Vendu	both	Voisin
2	2018-10-23		6	31		130	2018-10-18	6	2018-10-23	16			1	Nandinia_binotata	Mammalia	Carnivora	Nandiniidae	LC	Class C	2	Piège	Adulte	Frais	Masculin	Consommation propre	domestic
2	2019-02-02		6	31		53	2019-01-31	9	2019-02-02	14		jour	1	Nandinia_binotata	Mammalia	Carnivora	Nandiniidae	LC	Class C	2	Piège	Jeune	Boucané	Masculin	Consommation propre	domestic
2	2018-10-23		6	31		130	2018-10-18	6	2018-10-23	16			1	Philantomba_monticola	Mammalia	Artiodactyla	Bovidae	LC	Class C	6.25	Piège	Adulte	Frais	Feménin	Consommation propre	domestic
2	2018-11-03		6	31		180	2018-10-27	7	2018-11-03	19		jour	1	Philantomba_monticola	Mammalia	Artiodactyla	Bovidae	LC	Class C	6.25	Piège	Adulte	Frais	Feménin	Consommation propre	domestic
2	2018-11-03		6	31		180	2018-10-27	7	2018-11-03	19		jour	1	Philantomba_monticola	Mammalia	Artiodactyla	Bovidae	LC	Class C	6.25	Piège	Adulte	Boucané	Masculin	Consommation propre	domestic
2	2018-11-15		6	31		104	2018-11-11	7	2018-11-15	15		jour	1	Philantomba_monticola	Mammalia	Artiodactyla	Bovidae	LC	Class C	6.25	Piège	Jeune	Frais	Masculin	Consommation propre	domestic
2	2018-11-23		6	31		16	2018-11-22	19	2018-11-23	11	2018-11-22	matin	1	Philantomba_monticola	Mammalia	Artiodactyla	Bovidae	LC	Class C	6.25	Fusil	Adulte	Frais	Feménin	Consommation propre	domestic
2	2018-11-30		6	31		10	2018-11-30	7	2018-11-30	17	2018-11-30	jour	1	Philantomba_monticola	Mammalia	Artiodactyla	Bovidae	LC	Class C	6.25	Fusil	Adulte	Frais	Masculin	Consommation propre	domestic
2	2018-12-13		6	31		49	2018-12-11	13h	2018-12-13	14h	2018-12-12	soir	1	Philantomba_monticola	Mammalia	Artiodactyla	Bovidae	LC	Class C	6.25	Piège	Adulte	Frais	Feménin	Consommation propre	domestic	Voisin
2	2018-12-28		6	31		37	2018-12-27	6h	2018-12-28	19h		nuit	1	Philantomba_monticola	Mammalia	Artiodactyla	Bovidae	LC	Class C	6.25	Fusil	Adulte	Frais	Feménin	Consommation propre	domestic
2	2019-01-15		6	31		95	2019-01-11	7h	2019-01-15	6h	2019-01-15	soir	1	Philantomba_monticola	Mammalia	Artiodactyla	Bovidae	LC	Class C	6.25	Fusil		Boucané	Masculin	Consommation propre et Vendu	both
2	2019-01-15		6	31		95	2019-01-11	7h	2019-01-15	6h	2019-01-15	soir	1	Philantomba_monticola	Mammalia	Artiodactyla	Bovidae	LC	Class C	6.25	Fusil		Boucané	Feménin	À vendre	selling
2	2019-01-15		6	31		95	2019-01-11	7h	2019-01-15	6h	2019-01-15	soir	1	Philantomba_monticola	Mammalia	Artiodactyla	Bovidae	LC	Class C	6.25	Fusil		Boucané	Feménin	À vendre	selling
2	2019-01-22		6	31		28	2019-01-21	7h	2019-01-22	11h	2019-01-22	nuit	1	Philantomba_monticola	Mammalia	Artiodactyla	Bovidae	LC	Class C	6.25	Fusil	Adulte	Frais	Feménin	Consommation propre	domestic
2	2019-02-17		6	31		73	2019-02-14	6	2019-02-17	7		jour	1	Philantomba_monticola	Mammalia	Artiodactyla	Bovidae	LC	Class C	6.25	Piège	Jeune	Frais	Masculin	Consommation propre	domestic
2	2019-02-17		6	31		73	2019-02-14	6	2019-02-17	7		matin	1	Philantomba_monticola	Mammalia	Artiodactyla	Bovidae	LC	Class C	6.25	Piège	Adulte	Frais	Feménin	Vendu	selling
2	2019-02-24		6	31		49	2019-02-22	13	2019-02-24	14			1	Philantomba_monticola	Mammalia	Artiodactyla	Bovidae	LC	Class C	6.25	Piège	Adulte	Frais	Feménin	Consommation propre	domestic
2	2019-02-24		6	31		49	2019-02-22	13	2019-02-24	14		nuit	1	Philantomba_monticola	Mammalia	Artiodactyla	Bovidae	LC	Class C	6.25	Fusil	Jeune	Boucané	Masculin
2	2018-10-22		6	31			2018-10-22	6					-1
2	2018-11-12		6	31			2018-11-12	8	2018-11-12				-1
2	2018-12-07		6	31		24	2018-12-06	8	2018-12-07	8			-1
2	2019-02-10		6	31		5	2019-02-10	7	2019-10-01	12			-1
2	2018-10-20		6	31		5	2018-10-20	6	2018-10-20	11			-1
2	2018-10-21		6	31			2018-10-21	6					-1
2	2018-10-27		6	31			2018-10-27	7	2018-10-27				-1
2	2018-10-28		6	31			2018-10-28	7	2018-10-28				-1
2	2018-10-29		6	31		6	2018-10-29	7	2018-10-29	13			-1
2	2018-10-30		6	31		6	2018-10-30	7	2018-10-30	13			-1
2	2018-11-01		6	31			2018-11-01	7					-1
2	2018-11-02		6	31			2018-11-02						-1
2	2018-11-11		6	31									-1
2	2018-11-14		6	31			2018-11-14	7					-1
2	2018-11-22		6	31			2018-11-22	19					-1
2	2018-11-29		6	31			2018-11-29	7	2018-11-29			rien	-1
2	2018-12-06		6	31									-1
2	2018-12-10		6	31			2018-12-10	13					-1
2	2018-12-27		6	31			2018-12-27	6h					-1
2	2019-01-11		6	31			2019-01-11	7h					-1
2	2019-01-12		6	31									-1
2	2019-01-13		6	31									-1
2	2019-01-14		6	31									-1
2	2019-01-21		6	31			2019-01-21	7h					-1
2	2019-01-31		6	31									-1
2	2019-02-01		6	31									-1
2	2019-02-14		6	31									-1
2	2019-02-15		6	31									-1
2	2019-02-16		6	31									-1
2	2019-02-22		6	31									-1
2	2019-02-23		6	31									-1
2	2018-11-25		3	32		4	2018-11-25	8	2018-11-25	12	2018-11-25	matin	1	Agelastes_niger	Aves	Galliformes	Numididae		Class C		Piège	Adulte	Décomposé	Feménin	Consommation propre	domestic
2	2018-11-05		3	32		2	2018-11-05	7	2018-11-05	9h	2018-11-05	matin	1	Atherurus_africanus	Mammalia	Rodentia	Hystricidae	LC	Class C	1.93	Piège	Adulte	Frais	Masculin	Consommation propre	domestic
2	2018-11-08		3	32		2	2018-11-08	7	2018-11-08	9h	2018-11-08	matin	1	Atherurus_africanus	Mammalia	Rodentia	Hystricidae	LC	Class C	1.93	Piège	Adulte	Frais	Feménin	Vendu	selling	Passant
2	2018-11-09		3	32		2	2018-11-09	6	2018-11-09	8	2018-11-09	matin	1	Atherurus_africanus	Mammalia	Rodentia	Hystricidae	LC	Class C	1.93	Piège	Adulte	Frais	Feménin	Consommation propre	domestic
2	2018-11-12		3	32		2	2018-11-12	12	2018-11-12	14	2018-11-12	jour	1	Atherurus_africanus	Mammalia	Rodentia	Hystricidae	LC	Class C	1.93	Piège	Adulte	Décomposé	Feménin	Vendu	selling	Voisin
2	2018-11-16		3	32		2	2018-11-16	11	2018-11-16	13	2018-11-16	jour	1	Atherurus_africanus	Mammalia	Rodentia	Hystricidae	LC	Class C	1.93	Piège	Adulte	Frais	Masculin	Vendu	selling	Voisin
2	2018-11-25		3	32		4	2018-11-25	8	2018-11-25	12	2018-11-25	matin	1	Atherurus_africanus	Mammalia	Rodentia	Hystricidae	LC	Class C	1.93	Piège	Jeune		Masculin	Consommation propre	domestic
2	2018-11-26		3	32		2	2018-11-26	7	2018-11-26	9h	2018-11-26	matin	1	Atherurus_africanus	Mammalia	Rodentia	Hystricidae	LC	Class C	1.93	Piège	Jeune	Frais	Masculin	Vendu	selling	Voisin
2	2018-12-08		3	32			2018-12-08		2018-12-08		2018-12-08	matin	1	Atherurus_africanus	Mammalia	Rodentia	Hystricidae	LC	Class C	1.93	Piège	Jeune	Décomposé	Masculin	Consommation propre	domestic
2	2018-12-23		3	32		3	2018-12-23	13h	2018-12-23	16h	2018-12-23	jour	1	Atherurus_africanus	Mammalia	Rodentia	Hystricidae	LC	Class C	1.93	Piège	Adulte	Frais	Masculin	Consommation propre	domestic
2	2018-12-25		3	32		4	2018-12-25	6h	2018-12-25	10h	2018-12-25	matin	1	Atherurus_africanus	Mammalia	Rodentia	Hystricidae	LC	Class C	1.93	Piège	Jeune	Frais	Masculin	Consommation propre	domestic
2	2018-12-28		3	32		15	2018-12-27	16h	2018-12-28	7h		nuit	1	Atherurus_africanus	Mammalia	Rodentia	Hystricidae	LC	Class C	1.93	Fusil	Jeune	Frais	Masculin	Consommation propre	domestic
2	2019-01-07		3	32		7	2019-01-07	7h	2019-01-07	14h	2019-01-07	matin	1	Atherurus_africanus	Mammalia	Rodentia	Hystricidae	LC	Class C	1.93	Piège	Adulte	Frais	Feménin	Vendu	selling	Voisin
2	2019-01-08		3	32		5	2019-01-08	19h	2019-01-08	24h	2019-01-08	nuit	1	Atherurus_africanus	Mammalia	Rodentia	Hystricidae	LC	Class C	1.93	Fusil	Adulte	Frais	Masculin	Consommation propre	domestic
2	2019-01-11		3	32		4	2019-01-11	8h	2019-01-11	12h	2019-01-11	matin	1	Atherurus_africanus	Mammalia	Rodentia	Hystricidae	LC	Class C	1.93	Piège	Jeune	Frais	Masculin	Consommation propre	domestic
2	2019-02-07		3	32		9	2019-02-07	6	2019-02-07	15		matin	1	Atherurus_africanus	Mammalia	Rodentia	Hystricidae	LC	Class C	1.93	Piège	Jeune	Frais	Masculin	Consommation propre	domestic
2	2019-01-29		3	32		6	2019-01-29	9h	2019-01-29	15h	2019-01-29	jour	1	Atilas_paludinosus	Mammalia	Carnivora	Herpestidae	LC	Class C	2.8	Piège	Adulte	Frais	Feménin	Consommation propre	domestic
2	2018-12-13		3	32		5	2018-12-13	7h	2018-12-13	12h	2018-12-13	matin	1	Cephalophus_dorsalis	Mammalia	Artiodactyla	Bovidae	NT	Class B	20	Piège	Adulte	Frais	Masculin	Consommation propre et Vendu	both	Voisin
2	2018-12-28		3	32		15	2018-12-27	16h	2018-12-28	7h		nuit	1	Cephalophus_dorsalis	Mammalia	Artiodactyla	Bovidae	NT	Class B	20	Fusil	Jeune	Frais	Feménin	Consommation propre	domestic
2	2018-12-28		3	32		15	2018-12-27	16h	2018-12-28	7h		nuit	1	Cephalophus_dorsalis	Mammalia	Artiodactyla	Bovidae	NT	Class B	20	Fusil	Adulte	Frais	Feménin	Consommation propre	domestic
2	2019-01-15		3	32		9	2019-01-15	7h	2019-01-15	16h	2019-01-15	matin	1	Cephalophus_dorsalis	Mammalia	Artiodactyla	Bovidae	NT	Class B	20	Fusil	Jeune		Feménin	Consommation propre	domestic
2	2019-02-02		3	32		12	2019-02-01	19	2019-02-02	7		nuit	1	Cephalophus_dorsalis	Mammalia	Artiodactyla	Bovidae	NT	Class B	20	Fusil	Adulte	Frais	Masculin	Consommation propre et Vendu	both
2	2019-02-10		3	32		22	2019-02-09	16	2019-02-10	14		nuit	1	Cephalophus_dorsalis	Mammalia	Artiodactyla	Bovidae	NT	Class B	20	Fusil	Adulte	Frais		Consommation propre et à vendre	both
2	2018-12-18		3	32		80	2018-12-15	11h	2018-12-18	19h		matin	1	Cephalophus_nigrifrons	Mammalia	Artiodactyla	Bovidae	LC	Class C	13.9	Fusil	Adulte	Boucané	Masculin	Consommation propre et à vendre	both
2	2018-12-18		3	32		80	2018-12-15	11h	2018-12-18	19h		matin	1	Cercopithecus_cephus	Mammalia	Primates	Cercopithecidae	LC	Class C	3.485	Fusil	Adulte	Boucané	Masculin	Consommation propre et à vendre	both
2	2019-01-22		3	32		28	2019-01-21	7h	2019-01-22	11h	2019-01-21	jour	1	Cercopithecus_cephus	Mammalia	Primates	Cercopithecidae	LC	Class C	3.485	Fusil	Adulte	Boucané	Masculin	Consommation propre	domestic
2	2019-01-22		3	32		28	2019-01-21	7h	2019-01-22	11h	2019-01-21	jour	1	Cercopithecus_cephus	Mammalia	Primates	Cercopithecidae	LC	Class C	3.485	Fusil	Jeune	Boucané	Feménin	Consommation propre	domestic
2	2019-01-22		3	32		28	2019-01-21	7h	2019-01-22	11h	2019-01-22	matin	1	Cercopithecus_cephus	Mammalia	Primates	Cercopithecidae	LC	Class C	3.485	Fusil	Jeune	Frais	Feménin	Consommation propre	domestic
2	2019-02-17		3	32		7	2019-02-17	6	2019-02-17	13		matin	1	Cercopithecus_cephus	Mammalia	Primates	Cercopithecidae	LC	Class C	3.485	Fusil	Jeune	Frais	Feménin	Consommation propre	domestic
2	2018-12-18		3	32		80	2018-12-15	11h	2018-12-18	19h		jour	1	Cercopithecus_nictitans	Mammalia	Primates	Cercopithecidae	NT	Class C	5.41	Fusil	Adulte	Boucané	Masculin	À vendre	selling
2	2018-12-18		3	32		80	2018-12-15	11h	2018-12-18	19h		jour	1	Cercopithecus_nictitans	Mammalia	Primates	Cercopithecidae	NT	Class C	5.41	Fusil	Jeune	Boucané	Feménin	À vendre	selling
2	2019-01-15		3	32		9	2019-01-15	7h	2019-01-15	16h	2019-01-15	matin	1	Cercopithecus_nictitans	Mammalia	Primates	Cercopithecidae	NT	Class C	5.41	Fusil	Adulte	Frais	Masculin	Consommation propre	domestic
2	2019-01-22		3	32		28	2019-01-21	7h	2019-01-22	11h	2019-01-21	matin	1	Cercopithecus_nictitans	Mammalia	Primates	Cercopithecidae	NT	Class C	5.41	Fusil	Adulte	Frais	Masculin	Consommation propre	domestic
2	2019-02-10		3	32		22	2019-02-09	16	2019-02-10	14		matin	1	Cercopithecus_nictitans	Mammalia	Primates	Cercopithecidae	NT	Class C	5.41	Fusil	Adulte	Frais		À vendre	selling
2	2019-02-17		3	32		7	2019-02-17	6	2019-02-17	13		matin	1	Cercopithecus_nictitans	Mammalia	Primates	Cercopithecidae	NT	Class C	5.41	Fusil	Adulte	Frais	Masculin	Consommation propre	domestic
2	2018-10-18		3	32		4	2018-10-18	10	2018-10-18	14	2018-10-18	jour	1	Cricetomys_emini	Mammalia	Rodentia	Nesomyidae	LC	Class C	1.3	Piège	Adulte	Frais		Consommation propre	domestic
2	2018-10-21		3	32		1	2018-10-21	14	2018-10-21	15	2018-10-21	soir	1	Genetta_servalina	Mammalia	Carnivora	Herpestidae	LC	Class B	1.055	Piège	Adulte	Décomposé	Masculin	Consommation propre	domestic
2	2019-02-02		3	32		12	2019-02-01	19	2019-02-02	7		nuit	1	Genetta_servalina	Mammalia	Carnivora	Herpestidae	LC	Class B	1.055	Fusil	Adulte	Frais	Feménin	Consommation propre	domestic
2	2018-12-31		3	32		7	2018-12-31	7h	2018-12-31	14h	2018-12-31	matin	1	Herpestes_naso	Mammalia	Carnivora	Herpestidae	LC	Class C	2.9	Piège	Jeune	Boucané	Masculin	Consommation propre	domestic
2	2019-01-22		3	32		28	2019-01-21	7h	2019-01-22	11h	2019-01-21	nuit	1	Hyemoschus_aquaticus	Mammalia	Artiodactyla	Tragulidae	LC	Class C	10.85	Fusil	Adulte	Frais	Feménin	Consommation propre	domestic
2	2018-11-15		3	32		3	2018-11-15	8	2018-11-15	11	2018-11-15	matin	1	Kinixys_erosa	Reptilia	Testudines	Testudinidae	DD	Class B	1.5	Piège	Adulte	Vivant	Masculin	Consommation propre	domestic
2	2018-11-17		3	32		6	2018-11-17	9	2018-11-17	15	2018-11-17	jour	1	Kinixys_erosa	Reptilia	Testudines	Testudinidae	DD	Class B	1.5	Piège	Adulte	Vivant	Masculin	Consommation propre	domestic
2	2018-12-13		3	32		5	2018-12-13	7h	2018-12-13	12h	2018-12-13	matin	1	Nandinia_binotata	Mammalia	Carnivora	Nandiniidae	LC	Class C	2	Piège	Jeune	Frais	Masculin	Consommation propre	domestic
2	2019-01-27		3	32		17	2019-01-26	20h	2019-01-27	13h	2019-01-27	nuit	1	Nandinia_binotata	Mammalia	Carnivora	Nandiniidae	LC	Class C	2	Fusil	Adulte	Frais	Feménin	Consommation propre et Vendu	both
2	2019-02-04		3	32		5	2019-02-04	8	2019-02-04	13		matin	1	Nandinia_binotata	Mammalia	Carnivora	Nandiniidae	LC	Class C	2	Piège	Jeune	Frais	Masculin	Vendu	selling
2	2018-11-02		3	32		3	2018-11-02	8	2018-11-02	11	2018-11-02	matin	1	Philantomba_monticola	Mammalia	Artiodactyla	Bovidae	LC	Class C	6.25	Piège	Adulte	Frais	Feménin	Vendu	selling	Voisin
2	2019-01-07		3	32		7	2019-01-07	7h	2019-01-07	14h	2019-01-07	matin	1	Philantomba_monticola	Mammalia	Artiodactyla	Bovidae	LC	Class C	6.25	Piège	Jeune	Frais	Masculin	Consommation propre	domestic
2	2019-01-08		3	32		5	2019-01-08	19h	2019-01-08	24h	2019-01-08	nuit	1	Philantomba_monticola	Mammalia	Artiodactyla	Bovidae	LC	Class C	6.25	Fusil	Jeune	Frais	Masculin	Consommation propre	domestic
2	2019-01-22		3	32		28	2019-01-21	7h	2019-01-22	11h	2019-01-21	nuit	1	Philantomba_monticola	Mammalia	Artiodactyla	Bovidae	LC	Class C	6.25	Fusil	Adulte	Frais	Feménin	Consommation propre	domestic
2	2019-02-04		3	32		5	2019-02-04	8	2019-02-04	13		matin	1	Philantomba_monticola	Mammalia	Artiodactyla	Bovidae	LC	Class C	6.25	Piège	Adulte	Décomposé	Feménin	Consommation propre	domestic
2	2019-02-07		3	32		9	2019-02-07	6	2019-02-07	15		jour	1	Philantomba_monticola	Mammalia	Artiodactyla	Bovidae	LC	Class C	6.25	Piège	Adulte	Frais	Masculin	Vendu	selling
2	2019-02-10		3	32		22	2019-02-09	16	2019-02-10	14		nuit	1	Philantomba_monticola	Mammalia	Artiodactyla	Bovidae	LC	Class C	6.25	Fusil	Adulte	Frais	Feménin	À vendre	selling
2	2019-02-10		3	32		22	2019-02-09	16	2019-02-10	14		nuit	1	Philantomba_monticola	Mammalia	Artiodactyla	Bovidae	LC	Class C	6.25	Fusil	Jeune	Frais	Masculin	À vendre	selling
2	2019-02-23		3	32		13	2019-02-22	19	2019-02-22	8		nuit	1	Philantomba_monticola	Mammalia	Artiodactyla	Bovidae	LC	Class C	6.25	Fusil	Adulte	Frais	Masculin
2	2019-02-23		3	32		13	2019-02-22	19	2019-02-22	8		nuit	1	Philantomba_monticola	Mammalia	Artiodactyla	Bovidae	LC	Class C	6.25	Fusil	Jeune	Frais	Masculin
2	2018-12-23		3	32		3	2018-12-23	13h	2018-12-23	16h	2018-12-23	jour	1	Thryonomys_swinderianus	Mammalia	Rodentia	Thryonomyidae	LC	Class C	4.06	Piège	Adulte	Frais	Feménin	Consommation propre	domestic
2	2018-11-10		3	32		3	2018-11-10	7	2018-11-10	10			-1
2	2018-11-11		3	32		4	2018-11-11	7	2018-11-11	11			-1
2	2018-11-14		3	32		4	2018-11-14	7	2018-11-14	11			-1
2	2018-11-20		3	32		4	2018-11-20	7	2018-11-20	11			-1
2	2018-11-22		3	32		4	2018-11-22	7	2018-11-22	11			-1
2	2018-12-20		3	32		5	2018-12-20	7h	2018-12-20	12h			-1
2	2019-01-04		3	32		4	2019-01-04	9h	2019-01-04	13h			-1
2	2019-01-17		3	32		5	2019-01-17	8h	2019-01-17	13h		rien	-1
2	2019-02-15		3	32		6	2019-02-15	8	2019-02-15	14			-1
2	2019-02-25		3	32		6	2019-02-25	8	2019-02-25	14			-1
2	2018-10-29		3	32		2	2018-10-29	6	2018-10-29	8			-1
2	2018-11-29		3	32		2	2018-11-29	6	2018-11-29	8		rien	-1
2	2018-12-10		3	32		4	2018-12-10	6	2018-12-10	10			-1
2	2018-12-15		3	32			2018-12-15	11h					-1
2	2018-12-16		3	32			2019-12-15	11h					-1
2	2018-12-17		3	32			2018-12-15	11h					-1
2	2018-12-27		3	32			2018-12-27	10h					-1
2	2019-01-12		3	32			2019-01-12	8h					-1
2	2019-01-14		3	32			2019-01-14		2019-01-14				-1
2	2019-01-21		3	32			2019-01-21	7h					-1
2	2019-01-26		3	32			2019-01-26	20h					-1
2	2019-02-01		3	32									-1
2	2019-02-09		3	32									-1
2	2019-02-22		3	32									-1
7	2018-06-14	6	5	33		60	2018-06-12	6h	2018-06-14	18h	2018-06-13	nuit	1	Aonyx_congicus	Mammalia	Carnivora	Mustelidae	NT	Class B	21.4	Fusil	Adulte	Frais		Vendu	selling
7	2018-04-06	4	5	33		4	2018-04-06	7h	2018-04-06	11h	2018-04-06	9h	1	Atherurus_africanus	Mammalia	Rodentia	Hystricidae	LC	Class C	1.93	Piège	Adulte	Frais		À vendre	selling	Revendeur/euse
7	2018-04-21	4	5	33		6	2018-04-20	9h	2018-04-20	15h	2018-04-20		1	Atherurus_africanus	Mammalia	Rodentia	Hystricidae	LC	Class C	1.93	Piège	Adulte	Décomposé		Consommation propre	domestic
7	2018-04-22	4	5	33		2	2018-04-22	11h	2018-04-22	13h	2018-04-22	12h	1	Atherurus_africanus	Mammalia	Rodentia	Hystricidae	LC	Class C	1.93	Piège	Adulte	Décomposé		Consommation propre	domestic
7	2018-05-07	5	5	33		2	2018-05-07	7h	2018-05-07	9h	2018-05-07	Matin	1	Atherurus_africanus	Mammalia	Rodentia	Hystricidae	LC	Class C	1.93	Piège	Adulte	Frais		Consommation propre	domestic
7	2018-06-07	6	5	33		63	2018-06-05	8h	2018-06-07	23h	2018-06-07	Soir	1	Atherurus_africanus	Mammalia	Rodentia	Hystricidae	LC	Class C	1.93	Piège	Adulte	Décomposé		Consommation propre	domestic
7	2018-06-21	6	5	33		8	2018-06-21	8h	2018-06-21	16h	2018-06-21	Soir	1	Atherurus_africanus	Mammalia	Rodentia	Hystricidae	LC	Class C	1.93	Fusil	Adulte	Frais		Vendu	selling	Revendeur/euse
7	2018-07-14	7	5	33		4	2018-07-14	8h	2018-07-14	12h			1	Atherurus_africanus	Mammalia	Rodentia	Hystricidae	LC	Class C	1.93	Piège	Adulte	Décomposé		Consommation propre	domestic
7	2018-03-21	3	5	33		8	2018-03-21	7h	2018-03-21	15h	2018-03-21	10h	1	Bitis_gabonica	Reptilia	Squamata	Viperidae	LC	Class C	3.5	Autre	Adulte	Frais		Consommation propre	domestic
7	2018-05-19	5	5	33		34	2018-05-18	5h	2018-05-19	15h			1	Cephalophus_callipygus	Mammalia	Artiodactyla	Bovidae	LC	Class B	18.25	Piège	Adulte	Frais		Vendu	selling
7	2018-06-21	6	5	33		9	2018-06-21	8h	2018-06-21	16h	2018-06-21	Soir	1	Cephalophus_callipygus	Mammalia	Artiodactyla	Bovidae	LC	Class B	18.25	Fusil	Adulte	Frais		Vendu	selling	Voisin
7	2018-06-21	6	5	33		8	2018-06-21	8h	2018-06-21	16h	2018-06-21	Soir	1	Cephalophus_callipygus	Mammalia	Artiodactyla	Bovidae	LC	Class B	18.25	Piège	Adulte	Boucané		Consommation propre et Vendu	both	Revendeur/euse
7	2018-07-13	7	5	33		58	2018-07-11	9h	2018-07-13	19h		soir	1	Cephalophus_callipygus	Mammalia	Artiodactyla	Bovidae	LC	Class B	18.25	Piège	Adulte	Frais		Consommation propre et Vendu	both	Revendeur/euse
7	2018-06-07	6	5	33		63	2018-06-05	8h	2018-06-07	23h	2018-06-07	nuit	1	Cephalophus_dorsalis	Mammalia	Artiodactyla	Bovidae	NT	Class B	20	Fusil	Adulte	Frais		Vendu	selling	Revendeur/euse
7	2018-06-14	6	5	33		60	2018-06-12	6h	2018-06-14	18h	2018-06-13	Soir	1	Cephalophus_dorsalis	Mammalia	Artiodactyla	Bovidae	NT	Class B	20	Piège		Boucané		Vendu	selling	Revendeur/euse
7	2018-03-31	3	5	33		6	2018-03-30	22h	2018-03-31	4h	2018-03-31	1h	1	Cephalophus_silvicultor	Mammalia	Artiodactyla	Bovidae	NT	Class A	72.5	Fusil	Jeune	Boucané		Vendu	selling	Revendeur/euse
7	2018-03-08	3	5	33		15	2018-03-07	14h	2018-03-08	5h			1	Cephalophus_spp.	Mammalia	Artiodactyla	Bovidae	various	Class B	16.21	Fusil	Adulte	Frais		Consommation propre et À vendre	both	Revendeur/euse
7	2018-03-17	3	5	33		56	2018-03-16	6h	2018-03-18	14h			1	Cephalophus_spp.	Mammalia	Artiodactyla	Bovidae	various	Class B	16.21	Piège	Adulte	Frais		Consommation propre et Vendu	both	Revendeur/euse
7	2018-04-07	4	5	33		2	2018-04-07	7h	2018-04-07	9h	2018-04-07	8h	1	Cephalophus_spp.	Mammalia	Artiodactyla	Bovidae	various	Class B	16.21	Piège	Jeune	Frais		Consommation propre et Vendu	both	Voisin
7	2018-07-02	7	5	33		8	2018-07-02	6h	2018-07-02	14h	2018-07-02	matin	1	Cercopithecus_cephus	Mammalia	Primates	Cercopithecidae	LC	Class C	3.485	Fusil	Adulte	Frais		Consommation propre	domestic
7	2018-05-07	5	5	33		2	2018-05-07	7h	2018-05-07	9h	2018-05-07	Matin	1	Cricetomys_emini	Mammalia	Rodentia	Nesomyidae	LC	CLass C	1.3	Piège	Adulte	Frais		Consommation propre	domestic
7	2018-05-17	5	5	33		2	2018-05-17	15h	2018-05-17	17h	2018-05-17	soir	1	Cricetomys_emini	Mammalia	Rodentia	Nesomyidae	LC	CLass C	1.3	Piège	Adulte	Décomposé		Consommation propre	domestic
7	2018-07-23	7	5	33		12	2018-07-23	4h	2018-07-23	16h	2018-07-23		1	Cricetomys_emini	Mammalia	Rodentia	Nesomyidae	LC	CLass C	1.3	Piège	Adulte	Frais		Consommation propre	domestic
7	2018-03-17	3	5	33		56	2018-03-16	6h	2018-03-18	14h			1	Kinixys_erosa	Reptilia	Testudines	Testudinidae	DD	Class B	1.5	Piège	Adulte	Vivant		Consommation propre	domestic
7	2018-05-19	5	5	33		34	2018-05-18	5h	2018-05-19	15h			1	Kinixys_erosa	Reptilia	Testudines	Testudinidae	DD	Class B	1.5	Piège	Adulte	Vivant		Consommation propre	domestic
7	2018-06-07	6	5	33		63	2018-06-05	8h	2018-06-07	23h	2018-06-07	nuit	1	Lophocebus_albigena	Mammalia	Primates	Cercopithecidae	LC	Class C	7.69	Fusil	Adulte	Frais		Vendu	selling	Revendeur/euse
7	2018-07-02	7	5	33		8	2018-07-02	6h	2018-07-02	14h	2018-07-02	matin	1	Lophocebus_albigena	Mammalia	Primates	Cercopithecidae	LC	Class C	7.69	Fusil	Adulte	Frais		Vendu	selling
7	2018-05-17	5	5	33		2	2018-05-17	15h	2018-05-17	17h	2018-05-17	soir	1	Peliperdix_lathami/Pternistis_squamatus	Aves	Galliformes	Phasianidae	LC		0.269	Piège	Adulte	Frais		Consommation propre	domestic
7	2018-07-13	7	5	33		58	2018-07-11	9h	2018-07-13	19h		soir	1	Phataginus_spp.	Mammalia	Pholidota	Manidae	VU/EN	Class C	2.425	Piège	Adulte			Vendu	selling	Revendeur/euse
7	2018-03-08	3	5	33		15	2018-03-07	14h	2018-03-08	5h			1	Philantomba_monticola	Mammalia	Artiodactyla	Bovidae	LC	Class C	6.25	Fusil	Adulte	Frais		À vendre	selling	Voisin
7	2018-03-08	3	5	33		15	2018-03-07	14h	2018-03-08	5h			1	Philantomba_monticola	Mammalia	Artiodactyla	Bovidae	LC	Class C	6.25
7	2018-03-08	3	5	33		15	2018-03-07	14h	2018-03-08	5h			1	Philantomba_monticola	Mammalia	Artiodactyla	Bovidae	LC	Class C	6.25
7	2018-06-01	6	5	33		56	2018-05-30	9h	2018-06-01	17h	2018-06-01	Soir	1	Philantomba_monticola	Mammalia	Artiodactyla	Bovidae	LC	Class C	6.25	Piège	Adulte	Décomposé		Consommation propre	domestic
7	2018-06-01	6	5	33		56	2018-05-30	9h	2018-06-01	17h	2018-06-01	Soir	1	Philantomba_monticola	Mammalia	Artiodactyla	Bovidae	LC	Class C	6.25	Piège	Jeune	Décomposé		Consommation propre	domestic
7	2018-06-07	6	5	33		63	2018-06-05	8h	2018-06-07	23h	2018-06-07	Soir	1	Philantomba_monticola	Mammalia	Artiodactyla	Bovidae	LC	Class C	6.25	Piège	Adulte	Décomposé		Consommation propre	domestic
7	2018-06-07	6	5	33		63	2018-06-05	8h	2018-06-07	23h	2018-06-07	Soir	1	Philantomba_monticola	Mammalia	Artiodactyla	Bovidae	LC	Class C	6.25	Piège	Adulte	Frais		Vendu	selling	Revendeur/euse
7	2018-06-14	6	5	33		60	2018-06-12	6h	2018-06-14	18h	2018-06-13	nuit	1	Philantomba_monticola	Mammalia	Artiodactyla	Bovidae	LC	Class C	6.25	Fusil	Adulte	Frais		Vendu	selling	Revendeur/euse
7	2018-06-14	6	5	33		60	2018-06-12	6h	2018-06-14	18h	2018-06-13	nuit	1	Philantomba_monticola	Mammalia	Artiodactyla	Bovidae	LC	Class C	6.25	Fusil	Jeune	Frais		Consommation propre	domestic
7	2018-07-13	7	5	33		58	2018-07-11	9h	2018-07-13	19h		soir	1	Philantomba_monticola	Mammalia	Artiodactyla	Bovidae	LC	Class C	6.25	Piège	Adulte	Frais		Consommation propre	domestic
7	2018-07-21	7	5	33		5	2018-07-21	15h	2018-07-21	20h	2018-07-21	Soir	1	Philantomba_monticola	Mammalia	Artiodactyla	Bovidae	LC	Class C	6.25	Fusil	Adulte	Frais		Vendu	selling	Revendeur/euse
7	2018-07-21	7	5	33		5	2018-07-21	15h	2018-07-21	20h	2018-07-21	Soir	1	Philantomba_monticola	Mammalia	Artiodactyla	Bovidae	LC	Class C	6.25	Fusil	Adulte	Frais		Vendu	selling	Revendeur/euse
7	2018-07-21	7	5	33		5	2018-07-21	15h	2018-07-21	20h	2018-07-21	Soir	1	Philantomba_monticola	Mammalia	Artiodactyla	Bovidae	LC	Class C	6.25	Fusil	Jeune	Frais		Consommation propre	domestic
7	2018-07-23	7	5	33		12	2018-07-23	4h	2018-07-23	16h	2018-07-23		1	Philantomba_monticola	Mammalia	Artiodactyla	Bovidae	LC	Class C	6.25	Piège	Adulte	Frais		Vendu	selling	Revendeur/euse
7	2018-03-31	3	5	33		6	2018-03-30	22h	2018-03-31	4h			1	Thryonomys_swinderianus	Mammalia	Rodentia	Thryonomyidae	LC	Class C	4.06	Fusil	Adulte	Boucané		Consommation propre	domestic
7	2018-07-23	7	5	33		12	2018-07-23	4h	2018-07-23	16h	2018-07-23	matin	1	Thryonomys_swinderianus	Mammalia	Rodentia	Thryonomyidae	LC	Class C	4.06	Piège	Adulte	Frais		Consommation propre	domestic
7	2018-04-24	4	5	33		1	2018-04-24	16h	2018-04-24	17h	2018-04-24		1	Tragelaphus_spekeii	Mammalia	Artiodactyla	Bovidae	LC	Class B	78	Piège	Jeune	Frais		Consommation propre et Vendu	both	Voisin
7	2018-04-26	4	5	33		2	2018-04-26	15h	2018-04-26	17h	2018-04-26	16h	1	Tragelaphus_spekeii	Mammalia	Artiodactyla	Bovidae	LC	Class B	78	Piège	Jeune	Frais		Consommation propre et Vendu	both	Voisin
7	2018-03-26	3	5	33		1	2018-03-26	10h	2018-03-26	11h	2018-03-26	10h30	1	unspecified_bird	Aves	unspecified_aves	unspecified_aves				Fusil	Adulte	Frais		Consommation propre	domestic
7	2018-04-19	4	5	33			2018-04-19	15h	2018-04-16	16h			1	unspecified_bird	Aves	unspecified_aves	unspecified_aves				Fusil	Adulte	Frais		Consommation propre	domestic
7	2018-03-17	3	5	33		56	2018-03-16	6h	2018-03-18	14h			1	unspecified_monkey	Mammalia	Primates	unspecified_primates				Fusil	Adulte	Frais		Vendu	selling
7	2018-04-12	4	5	33		12	2018-04-12	7h	2018-04-12	19h	2018-04-12	9h	1	unspecified_monkey	Mammalia	Primates	unspecified_primates				Fusil	Adulte	Frais		À vendre	selling	Revendeur/euse
7	2018-04-12	4	5	33		12	2018-04-12	7h	2018-04-12	19h	2018-04-12	12h	1	unspecified_monkey	Mammalia	Primates	unspecified_primates				Fusil	Adulte	Frais		À vendre	selling	Revendeur/euse
7	2018-04-12	4	5	33		12	2018-04-12	7h	2018-04-12	19h	2018-04-12	15h	1	unspecified_monkey	Mammalia	Primates	unspecified_primates				Fusil	Jeune	Frais		Consommation propre	domestic
7	2018-07-14	7	5	33		4	2018-07-14	8h	2018-07-14	12h	2018-07-14	Matin	1	unspecified_monkey	Mammalia	Primates	unspecified_primates				Fusil	Adulte	Frais		Vendu	selling	Revendeur/euse
7	2018-07-17	7	5	33		5	2018-07-17	8h	2018-07-17	13h	2018-07-17	Matin	1	unspecified_monkey	Mammalia	Primates	unspecified_primates				Fusil	Adulte	Frais		Vendu	selling	Voisin
7	2018-07-17	7	5	33		5	2018-07-17	8h	2018-07-17	13h	2018-07-17	Matin	1	unspecified_monkey	Mammalia	Primates	unspecified_primates				Fusil	Adulte	Frais		Vendu	selling	Voisin
7	2018-03-28	3	5	33		4	2018-03-28	8h	2018-03-28	12h	2018-03-28	10h	1	Varanus_ornatus	Reptilia	Squamata	Varanidae	VU	Class B	5	Piège	Jeune	Frais		Consommation propre	domestic
7	2018-07-07	7	5	33		7	2018-07-07	6h	2018-07-07	13h	2018-07-07		-1
7	2018-07-20	7	5	33		9	2018-07-20	6h	2018-07-20	15h			-1
7	2018-03-11	3	5	33									-1
7	2018-03-16	3	5	33									-1
7	2018-05-18	5	5	33									-1
7	2018-05-30	5	5	33									-1
7	2018-05-31	5	5	33									-1
7	2018-06-05	6	5	33									-1
7	2018-06-12	6	5	33									-1
7	2018-07-12	7	5	33									-1
4	2018-04-07	4	6	34		57	2018-04-05	7h	2018-04-07	16h			1	Atherurus_africanus	Mammalia	Rodentia	Hystricidae	LC	Class C	1.93	Piège	Adulte	Boucané		Vendu	selling	Voisin
4	2018-04-07	4	6	34		57	2018-04-05	7h	2018-04-07	16h			1	Cephalophus_spp.	Mammalia	Artiodactyla	Bovidae	various	Class B	16.21	Piège	Adulte	Boucané		À vendre	selling	Voisin
4	2018-04-11	4	6	34		60	2018-04-09	6h	2018-04-11	18h			1	Cephalophus_spp.	Mammalia	Artiodactyla	Bovidae	various	Class B	16.21	Piège	Adulte	Boucané		À Vendre	selling	Voisin
4	2018-04-07	4	6	34		57	2018-04-05	7h	2018-04-07	16h			1	Philantomba_monticola	Mammalia	Artiodactyla	Bovidae	LC	Class C	6.25	Piège	Adulte	Boucané		Consommation propre	domestic
4	2018-04-19	4	6	34		58	2018-04-17	8h	2018-04-19	18h			-1
4	2018-04-05	4	6	34									-1
4	2018-04-06	4	6	34									-1
4	2018-04-09	4	6	34									-1
4	2018-04-10	4	6	34									-1
4	2018-04-17	4	6	34									-1
4	2018-04-18	4	6	34									-1
4	2018-05-25	5	5	35		9	2018-05-25	7h	2018-05-25	16h	2018-05-25		1	Atherurus_africanus	Mammalia	Rodentia	Hystricidae	LC	Class C	1.93	Piège	Adulte	Frais		Vendu	selling	Voisin
4	2018-06-17	6	5	35		106	2018-06-13	8h	2018-06-17	18h	2018-06-14		1	Atherurus_africanus	Mammalia	Rodentia	Hystricidae	LC	Class C	1.93	Piège	Adulte	Boucané		Vendu	selling	Voisin
4	2018-07-03	7	5	35		131	2018-06-28	7h	2018-07-03	18h		matin	1	Atherurus_africanus	Mammalia	Rodentia	Hystricidae	LC	Class C	1.93	Piège	Adulte	Boucané		Consommation propre	domestic
4	2018-05-08	5	5	35		105.5	2018-05-04	8h30	2018-05-08	18h			1	Cephalophus_callipygus	Mammalia	Artiodactyla	Bovidae	LC	Class B	18.25	Piège	Adulte	Boucané		Consommation propre	domestic
4	2018-05-25	5	5	35		9	2018-05-25	7h	2018-05-25	16h	2018-05-25		1	Cephalophus_callipygus	Mammalia	Artiodactyla	Bovidae	LC	Class B	18.25	Piège	Adulte	Frais		Vendu	selling	Passant
4	2018-06-07	6	5	35		109	2018-06-03	7h	2018-06-07	20h	2018-06-06		1	Cephalophus_callipygus	Mammalia	Artiodactyla	Bovidae	LC	Class B	18.25		Adulte	Boucané		Vendu	selling	Voisin
4	2018-06-17	6	5	35		106	2018-06-13	8h	2018-06-17	18h	2018-06-15		1	Cephalophus_callipygus	Mammalia	Artiodactyla	Bovidae	LC	Class B	18.25	Piège	Adulte	Boucané		Consommation propre	domestic
4	2018-07-03	7	5	35		131	2018-06-28	7h	2018-07-03	18h		matin	1	Cephalophus_callipygus	Mammalia	Artiodactyla	Bovidae	LC	Class B	18.25	Piège	Adulte	Boucané		Vendu	selling
4	2018-07-03	7	5	35		131	2018-06-28	7h	2018-07-03	18h		matin	1	Cephalophus_dorsalis	Mammalia	Artiodactyla	Bovidae	NT	Class B	20	Piège	Adulte	Boucané		Vendu	selling	En foret
4	2018-07-22	7	5	35		155	2018-07-16	7h	2018-07-22	18h		matin	1	cephalophus_dorsalis	Mammalia	Artiodactyla	Bovidae	NT	Class B	20	Piège	Adulte	Boucané		Vendu	selling	Voisin
4	2018-06-17	6	5	35		106	2018-06-13	8h	2018-06-17	18h	2018-06-16		1	Cephalophus_leucogaster	Mammalia	Artiodactyla	Bovidae	NT	unknown	12.7	Piège	Jeune	Boucané		Vendu	selling	Voisin
4	2018-05-25	5	5	35		9	2018-05-25	7h	2018-05-25	16h	2018-05-25		1	Nandinia_binotata	Mammalia	Carnivora	Nandiniidae	LC	Class C	2	Piège	Jeune	Frais		Consommation propre	domestic
4	2018-04-28	4	5	35		129	2018-04-23	8h	2018-04-28	17h			-1
4	2018-05-04	5	5	35			2018-05-04	8h30					-1
4	2018-06-13	6	5	35			2018-06-13	8h					-1
4	2018-06-24	6	5	35		106	2018-06-20	6h	2018-06-24	16h			-1
4	2018-06-29	6	5	35			2018-06-28	7h					-1
4	2018-07-01	7	5	35			2018-06-28						-1
4	2018-04-23	4	5	35									-1
4	2018-04-24	4	5	35									-1
4	2018-04-25	4	5	35									-1
4	2018-04-26	4	5	35									-1
4	2018-04-27	4	5	35									-1
4	2018-05-05	5	5	35									-1
4	2018-05-06	5	5	35									-1
4	2018-05-07	5	5	35									-1
4	2018-06-03	6	5	35									-1
4	2018-06-04	6	5	35									-1
4	2018-06-05	6	5	35									-1
4	2018-06-06	6	5	35									-1
4	2018-06-16	6	5	35									-1
4	2018-06-21	6	5	35									-1
4	2018-06-22	6	5	35									-1
4	2018-06-23	6	5	35									-1
4	2018-06-28	6	5	35									-1
4	2018-06-30	6	5	35									-1
4	2018-07-02	7	5	35									-1
4	2018-07-18	7	5	35									-1
4	2018-07-19	7	5	35									-1
4	2018-07-20	7	5	35									-1
4	2018-07-21	7	5	35									-1
5	2018-05-12	5	6	36		2	2018-05-12	14h	2018-05-12	16h			1	Cercopithecus_cephus	Mammalia	Primates	Cercopithecidae	LC	Class C	3.485	Fusil	Jeune	Frais		Consommation propre	domestic
9	2018-06-16	6	3	37		8	2018-06-16	7h	2018-06-16	15h	2018-06-16	matin	1	Atherurus_africanus	Mammalia	Rodentia	Hystricidae	LC	Class C	1.93	Piège	Adulte	Frais		Consommation propre	domestic
9	2018-06-20	6	3	37		9	2018-06-20	7h	2018-06-20	16h	2018-06-20	soir	1	Cephalophus_dorsalis	Mammalia	Artiodactyla	Bovidae	NT	Class B	20	Piège	Adulte	Frais		Consommation propre et À vendre	both
9	2018-04-27	4	3	37		4	2018-04-27	8h	2018-04-27	12h	2018-04-27	matin	1	Cricetomys_emini	Mammalia	Rodentia	Nesomyidae	LC	CLass C	1.3	Autre	Adulte	Frais		Consommation propre	domestic
9	2018-05-18	5	3	37		5	2018-05-18	7h	2018-05-18	12h	2018-05-18	matin	1	Cricetomys_emini	Mammalia	Rodentia	Nesomyidae	LC	CLass C	1.3	Autre	Adulte	Frais		Consommation propre	domestic
9	2018-06-07	6	3	37		9	2018-06-07	7h	2018-06-07	16h	2018-06-07	matin	1	Cricetomys_emini	Mammalia	Rodentia	Nesomyidae	LC	CLass C	1.3	Autre	Adulte	Frais		Consommation propre	domestic
9	2018-07-09	7	3	37		4	2018-07-09	8h	2018-07-09	12h	2018-07-09	matin	1	Cricetomys_emini	Mammalia	Rodentia	Nesomyidae	LC	CLass C	1.3	Autre	Adulte	Frais		Consommation propre	domestic
9	2018-07-07	7	3	37		8	2018-07-07	7h	2018-07-07	15h	2018-07-07	soir	1	Kinixys_erosa	Reptilia	Testudines	Testudinidae	DD	Class B	1.5	Autre	Adulte	Frais		Consommation propre	domestic
9	2018-04-29	4	3	37		9	2018-04-29	7h	2018-04-29	16h	2018-04-29	matin	1	Phataginus_spp.	Mammalia	Pholidota	Manidae	VU/EN	Class C	2.425	Piège	Adulte	Frais		Consommation propre	domestic
9	2018-05-16	5	3	37		7	2018-05-16	6h	2018-05-16	13h	2018-05-16	Soir	1	Phataginus_spp.	Mammalia	Pholidota	Manidae	VU/EN	Class C	2.425	Piège	Adulte	Vivant		À vendre	selling
9	2018-05-21	5	3	37		4	2018-05-21	7h	2018-05-21	11h	2018-05-21	matin	1	Philantomba_monticola	Mammalia	Artiodactyla	Bovidae	LC	Class C	6.25	Piège	Adulte	Décomposé		Consommation propre	domestic
9	2018-06-07	6	3	37		9	2018-06-07	7h	2018-06-07	16h	2018-06-07	matin	1	Philantomba_monticola	Mammalia	Artiodactyla	Bovidae	LC	Class C	6.25	Piège	Adulte	Frais		À vendre	selling
9	2018-05-09	5	3	37		5	2018-05-09	9h	2018-05-09	14h		matin	1	Thryonomys_swinderianus	Mammalia	Rodentia	Thryonomyidae	LC	Class C	4.06	Piège	Adulte	Frais		Consommation propre et Vendu	both	Voisin
9	2018-05-26	5	3	37		3	2018-05-26	8h30	2018-05-26	11h30	2018-05-26	matin	1	Thryonomys_swinderianus	Mammalia	Rodentia	Thryonomyidae	LC	Class C	4.06	Piège	Adulte	Frais		Consommation propre et Vendu	both	Voisin
9	2018-07-19	7	3	37		5	2018-07-19	7h	2018-07-19	12h	2018-07-19	matin	1	Thryonomys_swinderianus	Mammalia	Rodentia	Thryonomyidae	LC	Class C	4.06	Piège	Adulte	Frais		Consommation propre et vendu	both	Voisin
9	2018-05-23	5	3	37		6	2018-05-23	6h30	2018-05-23	12h30	2018-05-23	matin	1	Tragelaphus_spekeii	Mammalia	Artiodactyla	Bovidae	LC	Class B	78	Piège	Adulte	Frais		Consommation propre et Vendu	both	Revendeur/euse
9	2018-04-29	4	3	37		9	2018-04-29	7h	2018-04-29	16h	2018-04-29	soir	1	Varanus_ornatus	Reptilia	Squamata	Varanidae	VU	Class B	5	Autre	Adulte	Frais		Vendu	selling	Revendeur/euse
9	2018-03-12	3	3	37		5.5	2018-03-12	7h	2018-03-12	12h30			-1
9	2018-06-13	6	3	37		4	2018-06-13	7h	2018-06-13	11h			-1
9	2018-07-22	7	3	37		7	2018-07-22	7h	2018-07-22	14h			-1
7	2018-03-12	3	9	38		30	2018-03-11	6h	2018-03-12	12h	2018-03-11	20h	1	Atherurus_africanus	Mammalia	Rodentia	Hystricidae	LC	Class C	1.93	Fusil	Adulte	Frais		À vendre	selling
7	2018-03-19	3	9	38		80	2018-03-16	8h	2018-03-19	16h	2018-03-17	11h	1	Cephalophus_spp.	Mammalia	Artiodactyla	Bovidae	various	Class B	16.21	Piège	Adulte	Boucané		Consommation propre et vendu	both	Revendeur/euse
7	2018-03-10	3	9	38		9	2018-03-11	6h	2018-03-11	15h	2018-03-11		1	Cricetomys_emini	Mammalia	Rodentia	Nesomyidae	LC	CLass C	1.3	Piège	Adulte	Frais		Consommation Propre	domestic
7	2018-04-15	4	9	38		4	2018-04-14	9h	2018-04-14	13h			1	Cricetomys_emini	Mammalia	Rodentia	Nesomyidae	LC	CLass C	1.3	Piège	Adulte	Décomposé		Consommation propre	domestic
7	2018-04-19	4	9	38			2018-04-19	7h	2018-04-16	8h			1	Cricetomys_emini	Mammalia	Rodentia	Nesomyidae	LC	CLass C	1.3	Piège	Adulte	Frais		Consommation propre	domestic
7	2018-04-23	4	9	38		1	2018-04-23	7h	2018-04-23	8h	2018-04-23		1	Cricetomys_emini	Mammalia	Rodentia	Nesomyidae	LC	CLass C	1.3	Piège	Adulte	Décomposé		Consommation propre	domestic
7	2018-07-03	7	9	38		8	2018-07-03	7h	2018-07-03	15h	2018-07-03	Matin	1	Cricetomys_emini	Mammalia	Rodentia	Nesomyidae	LC	CLass C	1.3	Piège	Adulte	Frais		Consommation propre	domestic
7	2018-05-12	5	9	38		3	2018-05-12	11h	2018-05-12	14h	2018-05-12	matin	1	Crossarchus_obscurus	Mammalia	Carnivora	Herpestidae	LC		1.25	Piège	Adulte	Décomposé		Consommation propre	domestic
7	2018-04-04	4	9	38		9	2018-04-04	6h	2018-04-04	15h	2018-04-04	15h	1	Kinixys_erosa	Reptilia	Testudines	Testudinidae	DD	Class B	1.5	Autre	Adulte	Vivant		Consommation propre	domestic
7	2018-04-10	4	9	38		2	2018-04-10	7h	2018-04-10	9h	2018-04-10	matin	1	Naja_nigricollis	Reptilia	Squamata	Elapidae	LC	Class B		Piège	Adulte	Frais		Consommation propre	domestic
7	2018-04-04	4	9	38		9	2018-04-04	6h	2018-04-04	15h	2018-04-04	Après-midi	1	Nandinia_binotata	Mammalia	Carnivora	Nandiniidae	LC	Class C	2	Piège	Adulte	Frais		À vendre	selling	Voisin
7	2018-04-10	4	9	38		2	2018-04-10	7h	2018-04-10	9h	2018-04-10	Matin	1	Peliperdix_lathami/Pternistis_squamatus	Aves	Galliformes	Phasianidae	LC		0.269	Piège	Adulte	Frais		Consommation propre	domestic
7	2018-04-27	4	9	38		2	2018-04-27	9h	2018-04-27	11h			1	Peliperdix_lathami/Pternistis_squamatus	Aves	Galliformes	Phasianidae	LC		0.269	Piège	Adulte	Frais		Consommation propre	domestic
7	2018-05-08	5	9	38		6	2018-05-08	9h	2018-05-08	15h	2018-05-08	11h	1	Peliperdix_lathami/Pternistis_squamatus	Aves	Galliformes	Phasianidae	LC		0.269	Piège	Adulte	Frais		Consommation propre	domestic
7	2018-03-10	3	9	38		9	2018-03-11	6h	2018-03-11	15h	2018-03-11	9h	1	Philantomba_monticola	Mammalia	Artiodactyla	Bovidae	LC	Class C	6.25	Piège	Adulte	Frais		À vendre	selling	Revendeur/euse
7	2018-03-12	3	9	38		30	2018-03-11	6h	2018-03-12	12h	2018-03-11	20h	1	Philantomba_monticola	Mammalia	Artiodactyla	Bovidae	LC	Class C	6.25	Fusil	Adulte	Frais		Consommation propre	domestic
7	2018-03-12	3	9	38		30	2018-03-11	6h	2018-03-12	12h	2018-03-11	23h	1	Philantomba_monticola	Mammalia	Artiodactyla	Bovidae	LC	Class C	6.25	Fusil	Adulte	Frais		Consommation propre	domestic
7	2018-06-01	6	9	38		56	2018-05-30	9h	2018-06-01	17h	2018-05-30	Soir	1	Philantomba_monticola	Mammalia	Artiodactyla	Bovidae	LC	Class C	6.25	Piège	Adulte	Frais		Consommation propre	domestic
7	2018-06-07	6	9	38		39	2018-06-05	8h	2018-06-06	23h	2018-06-06	Soir	1	Philantomba_monticola	Mammalia	Artiodactyla	Bovidae	LC	Class C	6.25	Piège	Adulte	Décomposé		Consommation propre	domestic
7	2018-03-12	3	9	38		30	2018-03-11	6h	2018-03-12	12h	2018-03-11	14h	1	Potamochoerus_porcus	Mammalia	Artiodactyla	Suidae	LC	Class B	70	Fusil	Adulte	Frais		Consommation propre et À vendre	both	Revendeur/euse
7	2018-06-07	6	9	38		39	2018-06-05	8h	2018-06-06	23h	2018-06-06	soir	1	Smutsia_gigantea	Mammalia	Pholidota	Manidae	VU	Class A	33	Piège	Adulte	Frais		Vendu	selling	Revendeur/euse
7	2018-03-10	3	9	38		9	2018-03-11	6h	2018-03-11	15h	2018-03-11		1	Thryonomys_swinderianus	Mammalia	Rodentia	Thryonomyidae	LC	Class C	4.06	Piège	Adulte	Frais		À vendre	selling	Revendeur/euse
7	2018-04-15	4	9	38		4	2018-04-14	9h	2018-04-14	13h			1	Thryonomys_swinderianus	Mammalia	Rodentia	Thryonomyidae	LC	Class C	4.06	Piège	Adulte	Décomposé		Consommation propre	domestic
7	2018-05-14	5	9	38		4	2018-05-14	9h	2018-05-14	13h	2018-05-14	matin	1	Thryonomys_swinderianus	Mammalia	Rodentia	Thryonomyidae	LC	Class C	4.06	Piège	Jeune	Frais		Consommation propre	domestic
7	2018-06-01	6	9	38		56	2018-05-30	9h	2018-06-01	17h	2018-05-30	Soir	1	unspecified_mongoose	Mammalia	Carnivora	Herpestidae				Piège	Adulte	Frais		Vendu	selling	Revendeur/euse
7	2018-07-03	7	9	38		8	2018-07-03	7h	2018-07-03	15h	2018-07-03	Matin	1	Varanus_ornatus	Reptilia	Squamata	Varanidae	VU	Class B	5	Piège	Jeune	Décomposé		Consommation propre	domestic
7	2018-03-13	3	9	38		11	2018-03-13	5h	2018-03-13	16h			-1								Piège
7	2018-05-07	5	9	38		3	2018-05-07	8h	2018-05-07	11h			-1
7	2018-03-11	3	9	38									-1
7	2018-03-16	3	9	38									-1
7	2018-03-17	3	9	38									-1
7	2018-03-18	3	9	38									-1
7	2018-04-14	4	9	38									-1
7	2018-05-30	5	9	38		7	2018-05-30	7h	2018-05-30	14h			-1
7	2018-05-31	5	9	38									-1
6	2018-04-26	4	19	39		11	2018-04-26	7h	2018-04-26	18h	2018-04-26	13h40	1	Atherurus_africanus	Mammalia	Rodentia	Hystricidae	LC	Class C	1.93	Piège	Adulte	Vivant		Vendu	selling	Bantou
6	2018-04-30	4	19	39		7	2018-04-30	9h	2018-04-30	16h	2018-04-30	13h	1	Atherurus_africanus	Mammalia	Rodentia	Hystricidae	LC	Class C	1.93	Piège	Jeune			Consommation propre	domestic
6	2018-05-22	5	19	39		11	2018-05-22	6h	2018-05-22	17h	2018-05-22	soir	1	Atherurus_africanus	Mammalia	Rodentia	Hystricidae	LC	Class C	1.93	Piège	Adulte	Vivant		vendu	selling	Bantou
6	2018-04-28	4	19	39		11.5	2018-04-28	7h30	2018-04-28	19h	2018-04-28	15h20	1	Cephalophus_callipygus	Mammalia	Artiodactyla	Bovidae	LC	Class B	18.25	Fusil	Adulte
6	2018-06-27	6	19	39		1	2018-06-27	7h	2018-06-27	18h	2018-06-27	matin	1	Cephalophus_callipygus	Mammalia	Artiodactyla	Bovidae	LC	Class B	18.25	Fusil	Adulte	Frais		Consommation propre	domestic
6	2018-04-28	4	19	39		11.5	2018-04-28	7h30	2018-04-28	19h	2018-04-28	10h15	1	Cephalophus_dorsalis	Mammalia	Artiodactyla	Bovidae	NT	Class B	20	Fusil	Adulte	Frais
6	2018-05-24	5	19	39		2.5	2018-05-24	8h30	2018-05-24	11h	2018-05-24	matin	1	Cercopithecus_cephus	Mammalia	Primates	Cercopithecidae	LC	Class C	3.485	Fusil	Adulte	Frais		consommation propre	domestic
6	2018-05-31	5	19	39		9.5	2018-05-31	8h30	2018-05-31	18h	2018-05-31		1	Cercopithecus_cephus	Mammalia	Primates	Cercopithecidae	LC	Class C	3.485	Fusil	Adulte	frais		vendu	selling	Bantou
6	2018-06-10	6	19	39		9	2018-06-10	7h	2018-06-10	16h	2018-06-10	soir	1	Cercopithecus_cephus	Mammalia	Primates	Cercopithecidae	LC	Class C	3.485	Fusil	Adulte	Frais		Consommation propre	domestic
6	2018-06-12	6	19	39		11	2018-06-12	7h	2018-06-12	18h	2018-06-12	soir	1	Cercopithecus_cephus	Mammalia	Primates	Cercopithecidae	LC	Class C	3.485	Fusil	Adulte	Frais		Consommation propre	domestic
6	2018-06-27	6	19	39		11	2018-06-27	7h	2018-06-27	18h	2018-06-27	Soir	1	Cercopithecus_cephus	Mammalia	Primates	Cercopithecidae	LC	Class C	3.485	Fusil	Jeune	Frais		Consommation propre	domestic
6	2018-05-30	5	19	39		10	2018-05-30	6h	2018-05-30	16h	2018-05-30	matin	1	Cercopithecus_nictitans	Mammalia	Primates	Cercopithecidae	NT	Class C	5.41	Fusil	Adulte	Frais		consommation propre	domestic
6	2018-05-31	5	19	39		9.5	2018-05-31	8h30	2018-05-31	18h	2018-05-31		1	Cercopithecus_nictitans	Mammalia	Primates	Cercopithecidae	NT	Class C	5.41	Fusil	Adulte	frais		consommation propre	domestic
6	2018-06-10	6	19	39		9	2018-06-10	7h	2018-06-10	16h	2018-06-10	soir	1	Cercopithecus_nictitans	Mammalia	Primates	Cercopithecidae	NT	Class C	5.41	Fusil	Adulte	Frais		Consommation propre	domestic
6	2018-05-18	5	19	39		9	2018-05-18	8h	2018-05-18	17h	2018-05-18	soir	1	Kinixys_erosa	Reptilia	Testudines	Testudinidae	DD	Class B	1.5	Autre	Adulte	Vivant		consommation propre	domestic
6	2018-05-27	5	19	39		9.5	2018-05-27	8h30	2018-05-27	18h	2018-05-27	matin	1	Kinixys_erosa	Reptilia	Testudines	Testudinidae	DD	Class B	1.5	Autre	Adulte	Vivant		consommation propre	domestic
6	2018-06-09	6	19	39		7	2018-06-09	7h	2018-06-09	14h	2018-06-09	matin	1	Lophocebus_albigena	Mammalia	Primates	Cercopithecidae	LC	Class C	7.69	Fusil	Adulte	Frais		Consommation propre	domestic
6	2018-06-10	6	19	39		9	2018-06-10	7h	2018-06-10	16h	2018-06-10	soir	1	Lophocebus_albigena	Mammalia	Primates	Cercopithecidae	LC	Class C	7.69	Fusil	Adulte	Frais		Vendu	selling
6	2018-06-16	6	19	39		12	2018-06-16	6h	2018-06-16	18h	2018-06-16	matin	1	Lophocebus_albigena	Mammalia	Primates	Cercopithecidae	LC	Class C	7.69	Fusil	Adulte	Frais		Consommation propre	domestic
6	2018-05-03	5	19	39		8	2018-05-03	10h	2018-05-03	18h	2018-05-03	14h	1	Mandrillus_sphinx	Mammalia	Primates	Cercopithecidae	VU	Class A	18.25	Fusil	Adulte	Frais		Consommation propre	domestic
6	2018-05-09	5	19	39		10	2018-05-09	8h15	2018-05-09	18h	2018-05-09	soir	1	Nandinia_binotata	Mammalia	Carnivora	Nandiniidae	LC	Class C	2	Piège	Adulte	Frais		consommation propre	domestic
6	2018-05-15	5	19	39		6.5	2018-05-15	9h30	2018-05-15	16h	2018-05-15	soir	1	Nandinia_binotata	Mammalia	Carnivora	Nandiniidae	LC	Class C	2	Piège	Adulte	Vivant		consommation propre	domestic
6	2018-05-19	5	19	39		10.5	2018-05-19	7h30	2018-05-19	18h	2018-05-19	matin	1	Nandinia_binotata	Mammalia	Carnivora	Nandiniidae	LC	Class C	2	Piège	Adulte	Frais		consommation propre	domestic
6	2018-05-25	5	19	39		6.5	2018-05-25	7h50	2018-05-25	14h30	2018-05-25	soir	1	Nandinia_binotata	Mammalia	Carnivora	Nandiniidae	LC	Class C	2	Piège	Adulte	Frais		consommation propre	domestic
6	2018-06-01	6	19	39		11	2018-06-01	6h	2018-06-01	17h	2018-06-01	soir	1	Phataginus_spp.	Mammalia	Pholidota	Manidae	VU/EN	Class C	2.425	Piège	Adulte	Frais		vendu	selling	Revendeur/euse
6	2018-06-27	6	19	39		11	2018-06-27	7h	2018-06-27	18h	2018-06-27	matin	1	Phataginus_spp.	Mammalia	Pholidota	Manidae	VU/EN	Class C	2.425	Fusil	Adulte	Frais		Vendu	selling	Voisin
6	2018-04-26	4	19	39		11	2018-04-26	7h	2018-04-26	18h	2018-04-26	10h	1	Philantomba_monticola	Mammalia	Artiodactyla	Bovidae	LC	Class C	6.25	Piège	Adulte	Décomposé		Consommation propre	domestic
6	2018-05-02	5	19	39		8	2018-05-02	9h15	2018-05-02	17h15	2018-05-02	10h30	1	Philantomba_monticola	Mammalia	Artiodactyla	Bovidae	LC	Class C	6.25	Piège	Adulte	Décomposé		Consommation propre	domestic
6	2018-05-20	5	19	39		6	2018-05-20	6h00	2018-05-20	12h	2018-05-20	matin	1	Philantomba_monticola	Mammalia	Artiodactyla	Bovidae	LC	Class C	6.25	Piège	Adulte	Décomposé		consommation propre	domestic
6	2018-06-01	6	19	39		11	2018-06-01	6h	2018-06-01	17h	2018-06-01	matin	1	Philantomba_monticola	Mammalia	Artiodactyla	Bovidae	LC	Class C	6.25	Piège	Adulte	Décomposé		consommation propre	domestic
6	2018-06-02	6	19	39		2	2018-06-02	6h	2018-06-02	18h	2018-06-02	matin	1	Philantomba_monticola	Mammalia	Artiodactyla	Bovidae	LC	Class C	6.25	Piège	Adulte	Frais		consommation propre	domestic
6	2018-03-17	3	1	40		11.5	2018-03-17	7h	2018-03-17	18h30	2018-03-17	10h	1	Atherurus_africanus	Mammalia	Rodentia	Hystricidae	LC	Class C	1.93	Piège	Jeune	Vivant		Vendu	selling	Passant
6	2018-05-06	5	1	40		9.5	2018-05-06	7h30	2018-05-06	17h15	2018-05-06	10h15	1	Atherurus_africanus	Mammalia	Rodentia	Hystricidae	LC	Class C	1.93	Piège	Adulte	Décomposé		Consommation propre	domestic
6	2018-05-19	5	1	40		9.5	2018-05-19	8h15	2018-05-19	17h30	2018-05-19	matin	1	Atherurus_africanus	Mammalia	Rodentia	Hystricidae	LC	Class C	1.93
6	2018-05-21	5	1	40		8.5	2018-05-21	7h30	2018-05-21	16h	2018-05-21	matin	1	Atherurus_africanus	Mammalia	Rodentia	Hystricidae	LC	Class C	1.93	Piège	Adulte	Frais		consommation propre	domestic
6	2018-05-27	5	1	40		9	2018-05-27	7h30	2018-05-27	16h30	2018-05-27	matin	1	Atherurus_africanus	Mammalia	Rodentia	Hystricidae	LC	Class C	1.93	Piège	Adulte	Frais		consommation propre	domestic
6	2018-05-15	5	1	40		10	2018-05-15	7h	2018-05-15	17h	2018-05-15	matin	1	Bitis_gabonica	Reptilia	Squamata	Viperidae	LC	Class C	3.5	Autre	Adulte	Vivant		consommation propre	domestic
6	2018-05-25	5	1	40		4	2018-05-25	7h30	2018-05-25	11h30	2018-05-25	matin	1	Cephalophus_dorsalis	Mammalia	Artiodactyla	Bovidae	NT	Class B	20	Piège	Adulte	Frais		vendu	selling	Revendeur/euse
6	2018-06-23	6	1	40		9	2018-06-23	7h	2018-06-23	16h	2018-06-23	matin	1	Cephalophus_dorsalis	Mammalia	Artiodactyla	Bovidae	NT	Class B	20	Piège	Adulte	Frais		Consommation propre et Vendu	both	Bantou
6	2018-04-23	4	1	40		9.5	2018-04-23	6h30	2018-04-23	16h	2018-04-23	10h	1	Cricetomys_emini	Mammalia	Rodentia	Nesomyidae	LC	CLass C	1.3	Piège	Jeune	Vivant		Consommation propre	domestic
6	2018-07-22	7	1	40		10	2018-07-22	6h	2018-07-22	16h	2018-07-22	12h	1	Kinixys_erosa	Reptilia	Testudines	Testudinidae	DD	Class B	1.5	Autre	Adulte	Vivant		Consommation propre	domestic
6	2018-05-18	5	1	40		9.5	2018-05-18	6h30	2018-05-18	16h	2018-05-18	matin	1	Phataginus_spp.	Mammalia	Pholidota	Manidae	VU/EN	Class C	2.425	Piège	Jeune	Décomposé		consommation propre	domestic
6	2018-05-11	5	1	40		9	2018-05-11	8h	2018-05-11	17h	2018-05-11	soir	1	Philantomba_monticola	Mammalia	Artiodactyla	Bovidae	LC	Class C	6.25	Piège	Jeune	Décomposé		consommation propre	domestic
6	2018-05-30	5	1	40		10	2018-05-30	6h	2018-05-30	16h	2018-05-30	soir	1	Philantomba_monticola	Mammalia	Artiodactyla	Bovidae	LC	Class C	6.25	Piège	Adulte	Frais		consommation propre	domestic
6	2018-04-27	4	1	40		12	2018-04-27	6h	2018-04-27	18h	2018-04-27	11h10	1	Thryonomys_swinderianus	Mammalia	Rodentia	Thryonomyidae	LC	Class C	4.06	Piège	Adulte	Vivant		Consommation propre	domestic
6	2018-03-19	3	1	41		10	2018-03-19	7h30	2018-03-19	17h30	2018-03-19	10h30	1	Atherurus_africanus	Mammalia	Rodentia	Hystricidae	LC	Class C	1.93	Chien	Adulte	Vivant		Vendu	selling	Passant
8	2018-10-17		4	42		6	2018-10-17	10	2018-10-17	16	2018-10-17	jour	1	Aonyx_congicus	Mammalia	Carnivora	Mustelidae	NT	Class B	21.4	Piège	Adulte	Frais	Feménin	Consommation propre	domestic
8	2018-10-26		4	42		5	2018-10-26	11	2018-10-26	16	2018-10-26	soir	1	Atherurus_africanus	Mammalia	Rodentia	Hystricidae	LC	Class C	1.93	Piège	Jeune	Frais	Masculin	Consommation propre	domestic
8	2018-11-10		4	42		9	2018-11-10	7	2018-11-10	16	2018-11-10	matin	1	Atherurus_africanus	Mammalia	Rodentia	Hystricidae	LC	Class C	1.93	Piège	Jeune	Frais	Feménin	Vendu	selling
8	2018-12-30		4	42		51	2018-12-28	9h	2018-12-30	12h	2018-12-28	soir	1	Atherurus_africanus	Mammalia	Rodentia	Hystricidae	LC	Class C	1.93	Fusil	Jeune	Boucané	Masculin	Consommation propre	domestic
8	2019-01-18		4	42		57	2019-01-16	7h	2019-01-18	16h	2019-01-16	soir	1	Atherurus_africanus	Mammalia	Rodentia	Hystricidae	LC	Class C	1.93	Piège	Adulte	Boucané	Feménin	Consommation propre et Vendu	both
8	2018-11-14		4	42		4	2018-11-14	8	2018-11-14	12	2018-11-14	matin	1	Bitis_gabonica	Reptilia	Squamata	Viperidae	LC	Class C	3.5	Autre	Adulte	Frais		Vendu	selling
8	2018-10-17		4	42		6	2018-10-17	10	2018-10-17	16	2018-10-17	jour	1	Cephalophus_callipygus	Mammalia	Artiodactyla	Bovidae	LC	Class B	18.25	Piège	Adulte	Frais	Masculin	Consommation propre et Vendu	both
8	2019-02-17		4	42		53	2019-02-15	7	2019-02-17	12	2019-02-15		1	Cephalophus_callipygus	Mammalia	Artiodactyla	Bovidae	LC	Class B	18.25	Fusil	Adulte	Boucané	Feménin	Consommation propre et Vendu	both	Voisin
8	2018-12-01		4	42		9	2018-12-01	7	2018-12-01	16	2018-12-01	matin	1	Cephalophus_dorsalis	Mammalia	Artiodactyla	Bovidae	NT	Class B	20	Piège	Adulte	Décomposé	Feménin	Consommation propre	domestic
8	2019-01-15		4	42		9	2019-01-15	6h	2019-01-15	15h	2019-01-15	soir	1	Cephalophus_dorsalis	Mammalia	Artiodactyla	Bovidae	NT	Class B	20	Piège	Adulte	Boucané	Masculin	Consommation propre et Vendu	both	Voisin
8	2019-01-27		4	42		78	2019-01-24	6h	2019-01-27	12h		soir	1	Cephalophus_dorsalis	Mammalia	Artiodactyla	Bovidae	NT	Class B	20	Piège	Adulte	Boucané	Feménin	Consommation propre et Vendu	both	Voisin
8	2018-12-30		4	42		51	2018-12-28	9h	2018-12-30	12h	2018-12-28	soir	1	Cephalophus_leucogaster	Mammalia	Artiodactyla	Bovidae	NT	unknown	12.7	Piège	Adulte	Boucané	Feménin	Consommation propre	domestic
8	2018-11-26		4	42		125	2018-11-21	6	2018-11-26	11		soir	1	Cephalophus_silvicultor	Mammalia	Artiodactyla	Bovidae	NT	Class A	72.5	Piège	Jeune	Boucané	Feménin	Consommation propre	domestic
8	2019-01-18		4	42		57	2019-01-16	7h	2019-01-18	16h	2019-01-16	soir	1	Cephalophus_silvicultor	Mammalia	Artiodactyla	Bovidae	NT	Class A	72.5	Piège	Adulte	Boucané	Feménin	Consommation propre et Vendu	both	Voisin
8	2019-02-02		4	42		6	2019-02-02	7	2019-02-02	13		matin	1	Cephalophus_silvicultor	Mammalia	Artiodactyla	Bovidae	NT	Class A	72.5	Fusil	Adulte	Frais	Masculin	Consommation propre et Vendu	both	Voisin
8	2019-02-25		4	42		34	2019-02-24	6	2019-02-25	16		soir	1	Cephalophus_silvicultor	Mammalia	Artiodactyla	Bovidae	NT	Class A	72.5	Fusil	Adulte	Boucané	Masculin	Consommation propre et Vendu	both	Voisin
8	2018-12-17		4	42		35	2018-12-16	5h	2018-12-17	16h	2018-12-16	soir	1	Cercopithecus_cephus	Mammalia	Primates	Cercopithecidae	LC	Class C	3.485	Autre	Adulte	Décomposé	Feménin	Consommation propre	domestic
8	2019-02-06		4	42		10	2019-02-06	6	2019-02-06	16		matin	1	Cercopithecus_cephus	Mammalia	Primates	Cercopithecidae	LC	Class C	3.485	Fusil	Jeune	Frais	Feménin	Vendu	selling	Voisin
8	2019-02-06		4	42		10	2019-02-06	6	2019-02-06	16			1	Cercopithecus_nictitans	Mammalia	Primates	Cercopithecidae	NT	Class C	5.41	Fusil	Adulte	Frais	Feménin	Vendu	selling	Voisin
8	2018-11-10		4	42		9	2018-11-10	7	2018-11-10	16	2018-11-10	matin	1	Civettictis_civetta	Mammalia	Carnivora	Herpestidae	LC	Class B	12	Piège	Adulte	Frais	Feménin	Consommation propre	domestic
8	2019-02-25		4	42		34	2019-02-24	6	2019-02-25	16		matin	1	Hyemoschus_aquaticus	Mammalia	Artiodactyla	Tragulidae	LC	Class C	10.85	Piège	Adulte	Frais	Feménin	Vendu	selling	Revendeur/euse
8	2018-11-08		4	42		7	2018-11-08	7	2018-11-08	14	2018-11-08	matin	1	Kinixys_erosa	Reptilia	Testudines	Testudinidae	DD	Class B	1.5	Autre	Adulte	Vivant	Feménin	Consommation propre	domestic
8	2019-01-18		4	42		57	2019-01-16	7h	2019-01-18	16h	2019-01-16	soir	1	Kinixys_erosa	Reptilia	Testudines	Testudinidae	DD	Class B	1.5	Autre	Jeune	Vivant	?	Consommation propre	domestic	Voisin
8	2019-02-05		4	42		9	2019-02-05	6	2019-02-05	15		soir	1	Mandrillus_sphinx	Mammalia	Primates	Cercopithecidae	VU	Class A	18.25	Piège	Adulte	Décomposé	Feménin	Consommation propre	domestic
8	2019-02-17		4	42		53	2019-02-15	7	2019-02-17	12	2019-02-16		1	Mandrillus_sphinx	Mammalia	Primates	Cercopithecidae	VU	Class A	18.25	Fusil	Jeune	Boucané	Feménin	Vendu	selling	Voisin
8	2018-11-16		4	42		4	2018-11-16	8	2018-11-16	12	2018-11-16		1	Nandinia_binotata	Mammalia	Carnivora	Nandiniidae	LC	Class C	2	Piège	Adulte	Décomposé	Masculin	Consommation propre	domestic
8	2019-01-22		4	42		11	2019-01-22	7h	2019-01-22	18h	2019-01-22	soir	1	Osteolaemus_tetraspis	Reptilia	Crocodilia	Crocodylidae	VU	Class A		Piège	Adulte	Vivant	Masculin	Vendu	selling	commerçant
8	2019-02-06		4	42		10	2019-02-06	6	2019-02-06	16			1	Pan_troglodytes	Mammalia	Primates	Hominidae	EN	Class A	45	Fusil	Adulte	Frais	Masculin	Consommation propre et Vendu	both	Voisin
8	2018-10-26		4	42		5	2018-10-26	11	2018-10-26	16	2018-10-26	soir	1	Phataginus_spp.	Mammalia	Pholidota	Manidae	VU/EN	Class C	2.425	Piège	Adulte	Frais	Masculin	Vendu	selling
8	2018-10-30		4	42		10	2018-10-30	7	2018-10-30	17	2018-10-30	matin	1	Phataginus_spp.	Mammalia	Pholidota	Manidae	VU/EN	Class C	2.425	Piège	Adulte	Décomposé	Feménin	Consommation propre	domestic
8	2019-01-27		4	42		78	2019-01-24	6h	2019-01-27	12h		soir	1	Phataginus_spp.	Mammalia	Pholidota	Manidae	VU/EN	Class C	2.425	Piège	Adulte	Frais	Masculin	Consommation propre	domestic
8	2018-11-26		4	42		125	2018-11-21	6	2018-11-26	11		soir	1	Philantomba_monticola	Mammalia	Artiodactyla	Bovidae	LC	Class C	6.25	Piège	Adulte	Frais	Feménin	Vendu	selling
8	2019-01-27		4	42		78	2019-01-24	6h	2019-01-27	12h		matin	1	Philantomba_monticola	Mammalia	Artiodactyla	Bovidae	LC	Class C	6.25	Piège	Adulte	Frais	Masculin	Consommation propre	domestic
8	2019-01-22		4	42		11	2019-01-22	7h	2019-01-22	18h	2019-01-22	soir	1	Potamochoerus_porcus	Mammalia	Artiodactyla	Suidae	LC	Class B	70	Piège	Adulte	Boucané	Feménin	Consommation propre et Vendu	both	Passant
8	2019-02-17		4	42		53	2019-02-15	7	2019-02-17	12	2019-02-15		1	Potamochoerus_porcus	Mammalia	Artiodactyla	Suidae	LC	Class B	70	Fusil	Adulte	Boucané	Masculin	Consommation propre et Vendu	both	Passant
8	2019-01-15		4	42		9	2019-01-15	6h	2019-01-15	15h	2019-01-15	soir	1	Smutsia_gigantea	Mammalia	Pholidota	Manidae	VU	Class A	33	Piège	Adulte	Frais	Feménin	Consommation propre et Vendu	both	commerçant
8	2018-11-14		4	42		4	2018-11-14	8	2018-11-14	12	2018-11-14	matin	1	Thryonomys_swinderianus	Mammalia	Rodentia	Thryonomyidae	LC	Class C	4.06	Piège	Adulte	Frais	Feménin	Consommation propre	domestic
8	2018-11-02		4	42		10	2018-11-02	7	2018-11-02	17			-1
8	2019-01-10		4	42		5	2019-01-10	7h	2019-01-10	12h	rien		-1
8	2018-10-20		4	42		6	2018-10-20	7	2018-10-20	13			-1
8	2018-11-21		4	42			2018-11-21	6					-1
8	2018-11-22		4	42									-1
8	2018-11-23		4	42									-1
8	2018-11-24		4	42									-1
8	2018-11-25		4	42									-1
8	2018-12-16		4	42			2018-12-16	5h					-1
8	2018-12-28		4	42			2018-12-28	8h					-1
8	2018-12-29		4	42									-1
8	2019-01-13		4	42			2019-01-13	6h					-1
8	2019-01-16		4	42			2019-01-16	7h					-1
8	2019-01-21		4	42									-1
8	2019-01-24		4	42			2019-01-24	6h					-1
8	2019-02-15		4	42									-1
8	2019-02-16		4	42									-1
8	2019-02-24		4	42									-1
7	2018-03-08	3	10	43		8	2018-03-08	5h	2018-03-08	13h			1	Atherurus_africanus	Mammalia	Rodentia	Hystricidae	LC	Class C	1.93	Piège	Adulte	Décomposé		Consommation propre	domestic
7	2018-03-14	3	10	43		6	2018-03-14	6h	2018-03-14	12h	2018-03-14	7h	1	Atherurus_africanus	Mammalia	Rodentia	Hystricidae	LC	Class C	1.93	Piège	Adulte	Frais		Vendu	selling	Voisin
7	2018-03-14	3	10	43		6	2018-03-14	6h	2018-03-14	12h	2018-03-14	8h	1	Atherurus_africanus	Mammalia	Rodentia	Hystricidae	LC	Class C	1.93	Piège	Adulte	Frais		Vendu	selling	Voisin
7	2018-03-10	3	10	43		8	2018-03-10	6h	2018-03-10	14h		10h	1	Cephalophus_spp.	Mammalia	Artiodactyla	Bovidae	various	Class B	16.21	Piège	Adulte	Frais		Consommation propre et Vendu	both	Revendeur/euse
7	2018-03-10	3	10	43		8	2018-03-10	6h	2018-03-10	14h			1	Cephalophus_spp.	Mammalia	Artiodactyla	Bovidae	various	Class B	16.21	Piège	Adulte	Frais		Consommation propre et Vendu	both	Revendeur/euse
7	2018-03-10	3	10	43		8	2018-03-10	6h	2018-03-10	14h			1	Cephalophus_spp.	Mammalia	Artiodactyla	Bovidae	various	Class B	16.21	Piège	Jeune	Décomposé		Consommation propre	domestic	Revendeur/euse
7	2018-03-19	3	10	43		2	2018-03-19	11h	2018-03-19	13h	2018-03-19	12h	1	Cephalophus_spp.	Mammalia	Artiodactyla	Bovidae	various	Class B	16.21	Piège	Adulte	Frais		Consommation propre et Vendu	both	Revendeur/euse
7	2018-03-17	3	10	43		5	2018-03-17	6h	2018-03-17	11h	2018-03-17	9h	1	Thryonomys_swinderianus	Mammalia	Rodentia	Thryonomyidae	LC	Class C	4.06	Piège	Adulte	Frais		Vendu	selling	Revendeur/euse
7	2018-03-17	3	10	43		5	2018-03-17	6h	2018-03-17	11h	2018-03-17	8h	1	unspecified_bird	Aves	unspecified_aves	unspecified_aves				Piège	Adulte	Frais		Consommation propre	domestic
7	2018-03-20	3	10	43		3	2018-03-20	8h	2018-03-20	11h			-1
5	2018-04-30	4	7	44		4	2018-04-30	12h	2018-04-30	14h			1	unspecified_rodent	Mammalia	Rodentia	unspecified_rodentia				Piège	Jeune	Frais		Consommation propre	domestic
5	2018-06-30	6	7	44		4	2018-06-30	6h	2018-06-30	10h			-1
5	2018-07-08	7	7	44		3	2018-07-08	7h	2018-07-08	10h			-1
5	2018-06-16	6	7	44		4	2018-06-16	7h	2018-06-16	11h			-1
5	2018-06-26	6	7	44		3	2018-06-26	7h	2018-06-26	10h			-1
5	2018-06-04	6	8	45		6	2018-06-04	5h	2018-06-04	11h	2018-06-04	Matin	1	Cephalophus_dorsalis	Mammalia	Artiodactyla	Bovidae	NT	Class B	20	Piège	Adulte	Décomposé		À vendre	selling
5	2018-06-12	6	8	45		16	2018-06-12	12h	2018-06-12	4h	2018-06-12	nuit	1	Cephalophus_dorsalis	Mammalia	Artiodactyla	Bovidae	NT	Class B	20	Fusil	Adulte	Frais
5	2018-06-20	6	8	45		76	2018-06-17	10h	2018-06-20	14h		nuit	1	Cephalophus_dorsalis	Mammalia	Artiodactyla	Bovidae	NT	Class B	20	Fusil	Adulte	Boucané
5	2018-05-26	5	8	45		6	2018-05-26	7h	2018-05-26	13h	2018-05-26	Matin	1	Cercopithecus_cephus	Mammalia	Primates	Cercopithecidae	LC	Class C	3.485	Fusil	Adulte	Frais		Consommation propre et Vendu	both
5	2018-04-10	4	8	45		5	2018-04-10	7h	2018-04-10	12h			1	Cricetomys_emini	Mammalia	Rodentia	Nesomyidae	LC	CLass C	1.3	Piège	Adulte	Frais		Consommation propre	domestic
5	2018-05-18	5	8	45		5	2018-05-18	7h	2018-05-18	12h	2018-05-18	Matin	1	Cricetomys_emini	Mammalia	Rodentia	Nesomyidae	LC	CLass C	1.3	Piège	Adulte	Frais		Consommation propre	domestic
5	2018-05-21	5	8	45		3.5	2018-05-21	6h31	2018-05-21	10h	2018-05-21	Matin	1	Cricetomys_emini	Mammalia	Rodentia	Nesomyidae	LC	CLass C	1.3	Piège	Adulte	Frais		Consommation propre	domestic
5	2018-05-30	5	8	45		3	2018-05-30	7h	2018-05-30	10h	2018-05-30	Matin	1	Cricetomys_emini	Mammalia	Rodentia	Nesomyidae	LC	CLass C	1.3	Piège	Adulte	Décomposé		Consommation propre	domestic
5	2018-06-04	6	8	45		6	2018-06-04	5h	2018-06-04	11h	2018-06-04	Matin	1	Cricetomys_emini	Mammalia	Rodentia	Nesomyidae	LC	CLass C	1.3	Piège	Jeune	Décomposé
5	2018-06-04	6	8	45		6	2018-06-04	5h	2018-06-04	11h	2018-06-04	Matin	1	Cricetomys_emini	Mammalia	Rodentia	Nesomyidae	LC	CLass C	1.3	Piège	Adulte	Frais
5	2018-06-06	6	8	45		3	2018-06-05	7h	2018-06-05	10h	2018-06-05	Matin	1	Cricetomys_emini	Mammalia	Rodentia	Nesomyidae	LC	CLass C	1.3	Autre		Frais		Consommation propre	domestic
5	2018-06-16	6	8	45		4	2018-06-16	7h	2018-06-16	11h	2018-06-16	Matin	1	Cricetomys_emini	Mammalia	Rodentia	Nesomyidae	LC	CLass C	1.3	Piège	Adulte	Frais		consommation propre	domestic
5	2018-07-20	7	8	45		12	2018-07-20	19h	2018-07-21	7h	2018-07-20	nuit	1	Nandinia_binotata	Mammalia	Carnivora	Nandiniidae	LC	Class C	2	Fusil
5	2018-04-07	4	8	45		5	2018-04-07	11h	2018-04-07	16h			1	Philantomba_monticola	Mammalia	Artiodactyla	Bovidae	LC	Class C	6.25	Piège	Jeune	Frais		Consommation propre	domestic
5	2018-04-15	4	8	45		1	2018-04-15	7h	2018-04-15	8h			1	Philantomba_monticola	Mammalia	Artiodactyla	Bovidae	LC	Class C	6.25	Piège	Adulte	Frais		Consommation propre	domestic
5	2018-04-16	4	8	45		4	2018-04-16	8h	2018-04-16	12h			1	Philantomba_monticola	Mammalia	Artiodactyla	Bovidae	LC	Class C	6.25	Piège	Adulte	Frais		Consommation propre	domestic
5	2018-05-07	5	8	45		3	2018-05-07	7h	2018-05-07	10h			1	Philantomba_monticola	Mammalia	Artiodactyla	Bovidae	LC	Class C	6.25	Piège	Adulte	Décomposé		Consommation propre	domestic
5	2018-05-15	5	8	45		6	2018-05-15	7h00	2018-05-15	13h	2018-05-15	Matin	1	Philantomba_monticola	Mammalia	Artiodactyla	Bovidae	LC	Class C	6.25	Piège	Adulte			Consommation propre	domestic
5	2018-05-21	5	8	45		3.5	2018-05-21	6h31	2018-05-21	10h	2018-05-21	Matin	1	Philantomba_monticola	Mammalia	Artiodactyla	Bovidae	LC	Class C	6.25	Piège	Adulte	Frais		Consommation propre et Vendu	both
5	2018-05-24	5	8	45		5	2018-05-24	6h	2018-05-24	11h	2018-05-24	Matin	1	Philantomba_monticola	Mammalia	Artiodactyla	Bovidae	LC	Class C	6.25	Piège	Adulte	Décomposé		Consommation propre	domestic
5	2018-05-26	5	8	45		6	2018-05-26	7h	2018-05-26	13h	2018-05-26	Matin	1	Philantomba_monticola	Mammalia	Artiodactyla	Bovidae	LC	Class C	6.25	Piège	Adulte	Frais		Consommation propre et Vendu	both
5	2018-05-26	5	8	45		6	2018-05-26	7h	2018-05-26	13h	2018-05-26	Matin	1	Philantomba_monticola	Mammalia	Artiodactyla	Bovidae	LC	Class C	6.25	Piège	Adulte	Décomposé		Consommation propre et Vendu	both
5	2018-06-04	6	8	45		6	2018-06-04	5h	2018-06-04	11h	2018-06-04	Matin	1	Philantomba_monticola	Mammalia	Artiodactyla	Bovidae	LC	Class C	6.25	Piège	Adulte	Frais		À vendre	selling
5	2018-06-09	6	8	45		4	2018-06-09	6h	2018-06-09	10h	2018-06-09	Matin	1	Philantomba_monticola	Mammalia	Artiodactyla	Bovidae	LC	Class C	6.25	Piège	Jeune			Consommation propre	domestic
5	2018-06-12	6	8	45		16	2018-06-12	12h	2018-06-12	4h	2018-06-12	nuit	1	Philantomba_monticola	Mammalia	Artiodactyla	Bovidae	LC	Class C	6.25	Fusil	Adulte	Boucané
5	2018-06-12	6	8	45		16	2018-06-12	12h	2018-06-12	4h	2018-06-12	nuit	1	Philantomba_monticola	Mammalia	Artiodactyla	Bovidae	LC	Class C	6.25	Fusil	Adulte	Boucané
5	2018-06-12	6	8	45		16	2018-06-12	12h	2018-06-12	4h	2018-06-12	nuit	1	Philantomba_monticola	Mammalia	Artiodactyla	Bovidae	LC	Class C	6.25	Fusil	Adulte	Boucané
5	2018-06-12	6	8	45		16	2018-06-12	12h	2018-06-12	4h	2018-06-12	nuit	1	Philantomba_monticola	Mammalia	Artiodactyla	Bovidae	LC	Class C	6.25	Fusil	Adulte	Boucané
5	2018-06-12	6	8	45		16	2018-06-12	12h	2018-06-12	4h	2018-06-12	nuit	1	Philantomba_monticola	Mammalia	Artiodactyla	Bovidae	LC	Class C	6.25	Fusil	Adulte	Boucané
5	2018-06-12	6	8	45		16	2018-06-12	12h	2018-06-12	4h	2018-06-12	nuit	1	Philantomba_monticola	Mammalia	Artiodactyla	Bovidae	LC	Class C	6.25	Fusil	Adulte	Boucané
5	2018-06-12	6	8	45		16	2018-06-12	12h	2018-06-12	4h	2018-06-12	nuit	1	Philantomba_monticola	Mammalia	Artiodactyla	Bovidae	LC	Class C	6.25	Fusil	Adulte	Frais
5	2018-06-12	6	8	45		16	2018-06-12	12h	2018-06-12	4h	2018-06-12	nuit	1	Philantomba_monticola	Mammalia	Artiodactyla	Bovidae	LC	Class C	6.25	Fusil	Adulte	Frais
5	2018-06-20	6	8	45		76	2018-06-17	10h	2018-06-20	14h		nuit	1	Philantomba_monticola	Mammalia	Artiodactyla	Bovidae	LC	Class C	6.25	Fusil	Adulte	Boucané
5	2018-06-20	6	8	45		76	2018-06-17	10h	2018-06-20	14h		nuit	1	Philantomba_monticola	Mammalia	Artiodactyla	Bovidae	LC	Class C	6.25	Fusil	Adulte	Boucané
5	2018-06-20	6	8	45		76	2018-06-17	10h	2018-06-20	14h		nuit	1	Philantomba_monticola	Mammalia	Artiodactyla	Bovidae	LC	Class C	6.25	Fusil	Adulte	Boucané
5	2018-06-20	6	8	45		76	2018-06-17	10h	2018-06-20	14h		nuit	1	Philantomba_monticola	Mammalia	Artiodactyla	Bovidae	LC	Class C	6.25	Fusil	Adulte	Boucané
5	2018-04-19	4	8	45		2	2018-04-19	6h	2018-04-19	8h			-1
5	2018-04-25	4	8	45		2.5	2018-04-25	6h	2018-04-25	8h30			-1
5	2018-04-28	4	8	45		4	2018-04-28	6h	2018-04-28	10h			-1
5	2018-05-03	5	8	45		3.5	2018-05-03	6h30	2018-05-03	10h10			-1
5	2018-05-12	5	8	45		2.5	2018-05-12	6h30	2018-05-12	9h			-1
5	2018-05-28	5	8	45		6	2018-05-28	6h	2018-05-28	12h			-1
5	2018-06-01	6	8	45		4	2018-06-01	6h	2018-06-01	10h			-1
5	2018-06-17	6	8	45			2018-06-17						-1
5	2018-06-18	6	8	45			2018-06-18	10h					-1
5	2018-06-19	6	8	45			2018-06-17						-1
5	2018-07-10	7	8	45		10	2018-07-10	6h	2018-07-10	16h			-1
5	2018-04-21	4	8	45		2	2018-04-21	7h	2018-04-21	9h			-1
5	2018-05-01	5	8	45		5.5	2018-05-01	6h30	2018-05-01	12h			-1
9	2018-04-27	4	2	46		58	2018-04-25	6h	2018-04-27	16h	2018-04-27	midi	1	Atherurus_africanus	Mammalia	Rodentia	Hystricidae	LC	Class C	1.93	Piège	Adulte	Frais		Vendu	selling	Voisin
9	2018-06-09	6	2	46		17	2018-06-09	5h	2018-06-09	22h	2018-06-09	matin	1	Atherurus_africanus	Mammalia	Rodentia	Hystricidae	LC	Class C	1.93	Piège	Adulte	Frais		Vendu	selling
9	2018-06-19	6	2	46		12	2018-06-19	5h	2018-06-19	17h	2018-06-19	matin	1	Atherurus_africanus	Mammalia	Rodentia	Hystricidae	LC	Class C	1.93	Piège	Adulte	Décomposé		Consommation propre	domestic
9	2018-05-25	5	2	46		11	2018-05-25	6h	2018-05-25	17h	2018-05-25	Soir	1	Bdeogale_nigripes	Mammalia	Carnivora	Herpestidae	LC	Class C	2.5	Piège	Adulte	Frais		Consommation propre	domestic
9	2018-04-06	4	2	46		7	2018-04-06	7h	2018-04-06	14h	2018-04-06	Matin	1	Bitis_gabonica	Reptilia	Squamata	Viperidae	LC	Class C	3.5	Autre	Jeune	Frais		Consommation propre	domestic
9	2018-05-07	5	2	46		58	2018-05-05	6h	2018-05-07	16h	2018-05-07		1	Caracal_aurata	Mammalia	Carnivora	Felidae	VU	unknown	10.65	Piège	Adulte	Frais		Consommation propre	domestic
9	2018-05-02	5	2	46		10	2018-05-02	6h	2018-05-02	16h	2018-05-02	midi	1	Cephalophus_callipygus	Mammalia	Artiodactyla	Bovidae	LC	Class B	18.25	Piège	Adulte	Frais		Consommation propre et À vendre	both	Revendeur/euse
9	2018-06-03	6	2	46		8	2018-06-03	4h30	2018-06-03	12h30	2018-06-03	matin	1	Cephalophus_callipygus	Mammalia	Artiodactyla	Bovidae	LC	Class B	18.25	Piège	Adulte	Frais		Consommation propre et Vendu	both	Revendeur/euse
9	2018-07-03	7	2	46		35	2018-07-02	5h	2018-07-03	16h	2018-07-03	matin	1	Cephalophus_callipygus	Mammalia	Artiodactyla	Bovidae	LC	Class B	18.25	Piège	Adulte	Frais
9	2018-07-20	7	2	46		1	2018-07-19	11h	2018-07-19	12h			1	Cephalophus_callipygus	Mammalia	Artiodactyla	Bovidae	LC	Class B	18.25	Piège	Adulte	Boucané		Consommation propre et vendu	both	passant
9	2018-06-03	6	2	46		8	2018-06-03	4h30	2018-06-03	12h30	2018-06-03	matin	1	Cephalophus_dorsalis	Mammalia	Artiodactyla	Bovidae	NT	Class B	20	Piège	Adulte	Décomposé		Consommation propre	domestic
9	2018-07-08	7	2	46		10	2018-07-09	5h	2018-07-09	15h	2018-07-09	matin	1	Cephalophus_dorsalis	Mammalia	Artiodactyla	Bovidae	NT	Class B	20	Piège	Adulte	Boucané		Consommation propre et Vendu	both	Voisin
9	2018-04-09	4	2	46		5	2018-04-09	8h	2018-04-09	13h	2018-04-09	midi	1	Cricetomys_emini	Mammalia	Rodentia	Nesomyidae	LC	CLass C	1.3	Autre		Frais		Consommation propre	domestic
9	2018-04-17	4	2	46			2018-04-17	matin	2018-04-17	midi	2018-04-17	10h	1	Cricetomys_emini	Mammalia	Rodentia	Nesomyidae	LC	CLass C	1.3	Autre	Adulte	Frais		Consommation propre	domestic
9	2018-04-30	4	2	46		4	2018-04-30	8h	2018-04-30	12h	2018-04-30	matin	1	Cricetomys_emini	Mammalia	Rodentia	Nesomyidae	LC	CLass C	1.3	Piège	Adulte	Frais		Consommation propre	domestic
9	2018-06-14	6	2	46		8	2018-06-14	7h	2018-06-14	15h	2018-06-14	matin	1	Cricetomys_emini	Mammalia	Rodentia	Nesomyidae	LC	CLass C	1.3	Piège	Adulte	Frais		Consommation propre	domestic
9	2018-04-10	4	2	46			2018-04-10	8h	2018-04-10	soir	2018-04-10	matin	1	Mandrillus_sphinx	Mammalia	Primates	Cercopithecidae	VU	Class A	18.25	Fusil	Adulte	Frais		Consommation propre et Vendu	both	Revendeur/euse
9	2018-05-25	5	2	46		11	2018-05-25	6h	2018-05-25	17h	2018-05-25	matin	1	Mandrillus_sphinx	Mammalia	Primates	Cercopithecidae	VU	Class A	18.25	Piège	Adulte	Frais		Vendu	selling	Revendeur/euse
9	2018-04-27	4	2	46		58	2018-04-25	6h	2018-04-27	16h	2018-04-25	matin	1	Philantomba_monticola	Mammalia	Artiodactyla	Bovidae	LC	Class C	6.25	Piège	Adulte	Boucané		Consommation propre	domestic
9	2018-05-07	5	2	46		58	2018-05-05	6h	2018-05-07	16h	2018-05-05	Matin	1	Philantomba_monticola	Mammalia	Artiodactyla	Bovidae	LC	Class C	6.25	Piège	Adulte	Boucané		Vendu	selling	Voisin
9	2018-06-26	6	2	46		11	2018-06-26	5h	2018-06-26	16h	2018-06-26	matin	1	Philantomba_monticola	Mammalia	Artiodactyla	Bovidae	LC	Class C	6.25	Piège	Adulte	Frais		À vendre	selling
9	2018-06-26	6	2	46		11	2018-06-26	5h	2018-06-26	16h	2018-06-26	matin	1	Philantomba_monticola	Mammalia	Artiodactyla	Bovidae	LC	Class C	6.25	Piège	Adulte	Décomposé		Consommation propre	domestic
9	2018-07-03	7	2	46		35	2018-07-02	5h	2018-07-03	16h	2018-07-03	soir	1	Philantomba_monticola	Mammalia	Artiodactyla	Bovidae	LC	Class C	6.25	Piège	Jeune	Décomposé		Consommation propre	domestic
9	2018-07-20	7	2	46		1	2018-07-19	11h	2018-07-19	12h	2018-07-09	soir	1	unspecified_mongoose	Mammalia	Carnivora	Herpestidae				Piège	Jeune	Frais		Consommation propre	domestic
9	2018-07-03	7	2	46		35	2018-07-02	5h	2018-07-03	16h	2018-07-03	soir	1	unspecified_spotted_fowl	Aves	Galliformes	Numididae				Piège	Adulte	Vivant		vendu	selling	Revendeur/euse
9	2018-04-25	4	2	46			2018-04-25	6h					-1
9	2018-06-16	6	2	46		13	2018-06-16	5h	2018-06-16	18h			-1
9	2018-07-02	7	2	46			2018-07-02	5h					-1
9	2018-07-23	7	2	46		8	2018-07-23	8h	2018-07-23	16h			-1
9	2018-04-26	4	2	46									-1
9	2018-05-05	5	2	46									-1
9	2018-05-06	5	2	46									-1
6	2018-05-18	5	12	47		10	2018-05-18	5h	2018-05-18	15h	2018-05-18	matin	1	Atherurus_africanus	Mammalia	Rodentia	Hystricidae	LC	Class C	1.93	Piège	Adulte	Frais		vendu	selling	Bantou
6	2018-05-06	5	12	47		10	2018-05-06	8h	2018-05-06	18h10	2018-05-06	11h	1	Cephalophus_callipygus	Mammalia	Artiodactyla	Bovidae	LC	Class B	18.25	Fusil	Jeune	Vivant		Consommation propre et Vendu	both	Passant
6	2018-05-31	5	12	47		9.5	2018-05-31	8h	2018-05-31	17h30			1	Cephalophus_callipygus	Mammalia	Artiodactyla	Bovidae	LC	Class B	18.25
6	2018-04-21	4	12	47		12	2018-04-21	6h	2018-04-21	18h	2018-04-21	11h5	1	Cephalophus_spp.	Mammalia	Artiodactyla	Bovidae	various	Class B	16.21	Fusil	Jeune	Frais		Vendu	selling	Passant
6	2018-04-28	4	12	47		4	2018-04-28	10h	2018-04-28	14h	2018-04-28	12h30	1	Cercopithecus_cephus	Mammalia	Primates	Cercopithecidae	LC	Class C	3.485	Fusil	Jeune	Frais		Consommation propre	domestic
6	2018-05-03	5	12	47		11	2018-05-03	7h17	2018-05-03	18h35	2018-05-03	13h19	1	Cercopithecus_cephus	Mammalia	Primates	Cercopithecidae	LC	Class C	3.485	Fusil	Jeune	Vivant		Consommation propre	domestic
6	2018-05-30	5	12	47		10	2018-05-30	7h	2018-05-30	17h	2018-05-30	matin	1	Cercopithecus_cephus	Mammalia	Primates	Cercopithecidae	LC	Class C	3.485	Fusil	Adulte	Frais		vendu	selling	Bantou
6	2018-05-12	5	12	47		7	2018-05-12	9h	2018-05-12	16h	2018-05-12	soir	1	Cercopithecus_nictitans	Mammalia	Primates	Cercopithecidae	NT	Class C	5.41	Fusil	Jeune	Vivant		consommation propre	domestic
6	2018-05-24	5	12	47		5	2018-05-24	7h30	2018-05-24	12h30	2018-05-24	matin	1	Cercopithecus_nictitans	Mammalia	Primates	Cercopithecidae	NT	Class C	5.41	Fusil	Adulte	Frais		consommation propre	domestic
6	2018-05-28	5	12	47		4	2018-05-28	8h15	2018-05-28	12h	2018-05-28	matin	1	Cercopithecus_nictitans	Mammalia	Primates	Cercopithecidae	NT	Class C	5.41	Fusil	Adulte	Frais		consommation propre	domestic
6	2018-06-11	6	12	47		9	2018-06-11	7h	2018-06-11	16h	2018-06-11	matin	1	Cercopithecus_nictitans	Mammalia	Primates	Cercopithecidae	NT	Class C	5.41	Fusil	Adulte	Frais		Consommation propre	domestic
6	2018-06-22	6	12	47		11	2018-06-22	6h	2018-06-22	17h	2018-06-22	Soir	1	Cercopithecus_nictitans	Mammalia	Primates	Cercopithecidae	NT	Class C	5.41	Fusil	Adulte	Frais		Consommation propre	domestic
6	2018-06-23	6	12	47		8	2018-06-23	8h	2018-06-23	16h	2018-06-23	Soir	1	Cercopithecus_nictitans	Mammalia	Primates	Cercopithecidae	NT	Class C	5.41	Fusil	Adulte	Frais		Consommation propre	domestic
6	2018-07-01	7	12	47		9	2018-07-01	7h	2018-07-01	16h	2018-07-01	matin	1	Cercopithecus_nictitans	Mammalia	Primates	Cercopithecidae	NT	Class C	5.41	Fusil	Adulte	Frais		Consommation propre	domestic
6	2018-07-21	7	12	47		10	2018-07-21	6h	2018-07-21	16h	2018-07-21	11h	1	Cercopithecus_nictitans	Mammalia	Primates	Cercopithecidae	NT	Class C	5.41	Fusil	Adulte	Frais		Consommation propre	domestic
6	2018-05-13	5	12	47		7	2018-05-13	8h	2018-05-13	15h	2018-05-13	matin	1	Naja_nigricollis	Reptilia	Squamata	Elapidae	LC	Class B		Piège	Jeune	Vivant		à vendre	selling	Bantou
6	2018-05-29	5	12	47		10	2018-05-29	7h17	2018-05-29	17h20	2018-05-29	Matin	1	Naja_nigricollis	Reptilia	Squamata	Elapidae	LC	Class B		Piège	Adulte	Frais		consommation propre	domestic
6	2018-04-27	4	12	47		9	2018-04-27	9h	2018-04-27	18h15	2018-04-27	14h	1	Phataginus_spp.	Mammalia	Pholidota	Manidae	VU/EN	Class C	2.425	Piège	Jeune	Vivant		Vendu	selling	Bantou
6	2018-07-05	7	12	47		12	2018-07-05	6h	2018-07-05	18h	2018-07-05	matin	1	Phataginus_spp.	Mammalia	Pholidota	Manidae	VU/EN	Class C	2.425
6	2018-04-21	4	12	47		12	2018-04-21	6h	2018-04-21	18h	2018-04-21	13h30	1	Philantomba_monticola	Mammalia	Artiodactyla	Bovidae	LC	Class C	6.25
6	2018-04-21	4	12	47		12	2018-04-21	6h	2018-04-21	18h	2018-04-21		1	Philantomba_monticola	Mammalia	Artiodactyla	Bovidae	LC	Class C	6.25
6	2018-04-25	4	12	47		4	2018-04-25	8h	2018-04-25	12h	2018-04-25	11h	1	Philantomba_monticola	Mammalia	Artiodactyla	Bovidae	LC	Class C	6.25	Piège	Jeune	Frais		Consommation propre	domestic
6	2018-06-12	6	12	47		10	2018-06-12	6h	2018-06-12	16h	2018-06-12	matin	1	Philantomba_monticola	Mammalia	Artiodactyla	Bovidae	LC	Class C	6.25	Piège	Adulte	Frais		Consommation propre	domestic
6	2018-06-28	6	12	47		8	2018-06-28	6h	2018-06-28	14h	2018-06-28	matin	1	Philantomba_monticola	Mammalia	Artiodactyla	Bovidae	LC	Class C	6.25	Piège	Adulte	Frais		Consommation propre	domestic
6	2018-07-12	7	12	47		8	2018-07-12	7h	2018-07-12	15h	2018-07-12	11h	1	unspecified_mongoose	Mammalia	Carnivora	Herpestidae				Piège	Adulte	Frais		Consommation propre	domestic
6	2018-04-06	4	12	47			2018-04-06						-1
6	2018-04-17	4	12	47			2019-04-17						-1
9	2018-04-30	4	6	48		9	2018-04-30	6h	2018-04-30	15h	2018-04-30	13h	1	Agelastes_niger	Aves	Galliformes	Numididae		Class C		Piège	Adulte	Vivant		Vendu	selling	Voisin
9	2018-05-02	5	6	48		11	2018-05-02	5h	2018-05-02	16h	2018-05-02	matin	1	Atherurus_africanus	Mammalia	Rodentia	Hystricidae	LC	Class C	1.93	Piège	Adulte	Décomposé		Consommation propre	domestic
9	2018-05-02	5	6	48		11	2018-05-02	5h	2018-05-02	16h	2018-05-02	matin	1	Atherurus_africanus	Mammalia	Rodentia	Hystricidae	LC	Class C	1.93	Piège	Adulte	Frais		Vendu	selling	Passant
9	2018-05-05	5	6	48		10	2018-05-05	6h	2018-05-05	16h	2018-05-05		1	Bdeogale_nigripes	Mammalia	Carnivora	Herpestidae	LC	Class C	2.5	Piège	Adulte	Frais		Consommation propre	domestic
8	2019-01-02		4	48		4	2019-01-02	8h	2019-01-02	12h	2019-01-02	matin	1	Bitis_gabonica	Reptilia	Squamata	Viperidae	LC	Class C	3.5	Piège	Adulte	Frais	?	Consommation propre	domestic
8	2018-12-30		4	48		51	2018-12-28	9h	2018-12-30	12h	2018-12-29		1	Cephalophus_callipygus	Mammalia	Artiodactyla	Bovidae	LC	Class B	18.25	Piège	Adulte	Boucané	Feménin	Consommation propre et Vendu	both	Voisin
8	2019-01-19		4	48		10	2019-01-19	7h	2019-01-19	17h	2019-01-19	soir	1	Cephalophus_callipygus	Mammalia	Artiodactyla	Bovidae	LC	Class B	18.25	Fusil	Adulte	Frais	Masculin	Vendu	selling	Revendeur/euse
8	2019-02-19		4	48		13	2019-02-19	5	2019-02-19	18		matin	1	Cephalophus_callipygus	Mammalia	Artiodactyla	Bovidae	LC	Class B	18.25	Piège	Adulte	Frais	Masculin	Consommation propre et Vendu	both	Voisin
8	2019-02-26		4	48		16	2019-02-26	4	26/2/219	20		matin	1	Cephalophus_callipygus	Mammalia	Artiodactyla	Bovidae	LC	Class B	18.25	Piège	Adulte	Décomposé	Feménin	Consommation propre	domestic
8	2018-11-13		4	48		8	2018-11-13	6	2018-11-13	14	2018-11-13	matin	1	Cephalophus_dorsalis	Mammalia	Artiodactyla	Bovidae	NT	Class B	20	Piège	Adulte	Décomposé	Feménin	Consommation propre	domestic
8	2019-01-06		4	48		58	2019-01-04	6h	2019-01-06	16h	2019-01-04	soir	1	Cephalophus_dorsalis	Mammalia	Artiodactyla	Bovidae	NT	Class B	20	Piège	Adulte	Boucané	Masculin	Consommation propre et Vendu	both	Voisin
8	2019-01-30		4	48		24	2019-01-29	13	2019-01-30	13	2019-01-29	soir	1	Cephalophus_dorsalis	Mammalia	Artiodactyla	Bovidae	NT	Class B	20	Fusil	Adulte	Boucané	Masculin	Consommation propre et Vendu	both	Voisin
8	2019-02-18		4	48		5	2019-02-18	12	2019-02-18	19		soir	1	Cephalophus_dorsalis	Mammalia	Artiodactyla	Bovidae	NT	Class B	20	Piège	Adulte	Frais	Masculin	Consommation propre et Vendu	both	Voisin
8	2019-01-25		4	48		13	2019-01-25	6h	2019-01-25	19h	2019-01-25	soir	1	Cephalophus_nigrifrons	Mammalia	Artiodactyla	Bovidae	LC	Class C	13.9	Piège	Adulte	Frais	Masculin	Consommation propre et Vendu	both	Voisin
8	2019-02-05		4	48		6	2019-02-05	12	2019-02-05	18		soir	1	Cephalophus_nigrifrons	Mammalia	Artiodactyla	Bovidae	LC	Class C	13.9	Piège	Adulte	Frais	Masculin	Consommation propre et Vendu	both	Voisin
9	2018-04-20	4	6	48		9	2018-04-20	6h	2018-04-20	17h	2018-04-20	10h	1	Cephalophus_silvicultor	Mammalia	Artiodactyla	Bovidae	NT	Class A	72.5	Piège	Adulte	Frais		Consommation propre et Vendu	both	Revendeur/euse
9	2018-03-26	3	6	48		9.5	2018-03-26	6h	2018-03-26	15h30	2018-03-26	Midi	1	Cephalophus_spp.	Mammalia	Artiodactyla	Bovidae	various	Class B	16.21	Piège	Adulte	Frais		Consommation propre et À vendre	both	Revendeur/euse
9	2018-03-31	3	6	48			2018-03-31	8h	2018-03-31	soir	2018-03-31	Midi	1	Cephalophus_spp.	Mammalia	Artiodactyla	Bovidae	various	Class B	16.21	Piège	Adulte	Frais		Consommation propre et Vendu	both	Voisin
9	2018-04-18	4	6	48			2018-04-18	matin	2018-04-18	16h	2018-04-18	Matin	1	Cephalophus_spp.	Mammalia	Artiodactyla	Bovidae	various	Class B	16.21	Piège	Adulte	Frais		Consommation propre et Vendu	both	Revendeur/euse
9	2018-04-23	4	6	48		9	2018-04-23	7h	2018-04-23	17h	2018-04-23	matin	1	Cephalophus_spp.	Mammalia	Artiodactyla	Bovidae	various	Class B	16.21	Piège	Adulte	Frais		Consommation propre et Vendu	both	Revendeur/euse
8	2019-02-19		4	48		13	2019-02-19	5	2019-02-19	18		soir	1	Cercopithecus_nictitans	Mammalia	Primates	Cercopithecidae	NT	Class C	5.41	Fusil	Adulte	Frais	Feménin	Vendu	selling
8	2019-01-30		4	48		24	2019-01-29	13	2019-01-30	13	2019-01-30		1	Cercopithecus_pogonias	Mammalia	Primates	Cercopithecidae	VU	Class C	3.25	Fusil	Jeune	Frais	Masculin	Consommation propre	domestic
8	2019-02-19		4	48		13	2019-02-19	5	2019-02-19	18		matin	1	Colobus_guereza	Mammalia	Primates	Cercopithecidae	LC	Class A	10.2	Fusil	Adulte	Frais	Masculin	Vendu	selling	Voisin
9	2018-04-22	4	6	48		4	2018-04-22	8h	2018-04-22	12h	2018-04-22	Matin	1	Cricetomys_emini	Mammalia	Rodentia	Nesomyidae	LC	CLass C	1.3	Autre	Jeune	Frais		Consommation propre	domestic
9	2018-04-22	4	6	48		4	2018-04-22	8h	2018-04-22	12h	2018-04-22	matin	1	Cricetomys_emini	Mammalia	Rodentia	Nesomyidae	LC	CLass C	1.3	Autre	Adulte	Frais		Consommation propre	domestic
9	2018-05-03	5	6	48		4	2018-05-03	7h	2018-05-03	11h	2018-05-03	matin	1	Cricetomys_emini	Mammalia	Rodentia	Nesomyidae	LC	CLass C	1.3	Autre	Adulte	Frais		Consommation propre	domestic
8	2018-10-18		4	48		4	2018-10-18	8	2018-10-18	12	2018-10-18	matin	1	Cricetomys_emini	Mammalia	Rodentia	Nesomyidae	LC	Class C	1.3	Autre	Adulte	Frais	Masculin	Consommation propre	domestic
8	2018-11-11		4	48		2	2018-11-11	8	2018-11-11	10	2018-11-11	matin	1	Cricetomys_emini	Mammalia	Rodentia	Nesomyidae	LC	Class C	1.3	Piège	Jeune	Décomposé	Masculin	Consommation propre	domestic
8	2018-12-18		4	48		4	2018-12-18	8h	2018-12-18	12h	2018-12-18	matin	1	Cricetomys_emini	Mammalia	Rodentia	Nesomyidae	LC	Class C	1.3	Piège	Jeune	Décomposé	Masculin	Consommation propre	domestic
8	2019-01-02		4	48		4	2019-01-02	8h	2019-01-02	12h	2019-01-02	matin	1	Cricetomys_emini	Mammalia	Rodentia	Nesomyidae	LC	Class C	1.3	Piège	Adulte	Décomposé	Masculin	Consommation propre	domestic
8	2018-11-11		4	48		2	2018-11-11	8	2018-11-11	10	2018-11-11	matin	1	Dendroaspis_jamesoni	Reptilia	Squamata	Elapidae	LC	Class C		Piège	Adulte	Frais		Consommation propre	domestic
9	2018-04-30	4	6	48		9	2018-04-30	6h	2018-04-30	15h	2018-04-30	14h	1	Genetta_servalina	Mammalia	Carnivora	Herpestidae	LC	Class B	1.055	Piège	Jeune	Frais		Consommation propre	domestic
8	2019-02-03		4	48		13	2019-02-03	6	2019-02-03	19		Matin	1	Genetta_servalina	Mammalia	Carnivora	Herpestidae	LC	Class B	1.055	Piège	Jeune	Décomposé	Feménin	Consommation propre	domestic
8	2018-12-18		4	48		4	2018-12-18	8h	2018-12-18	12h	2018-12-18	matin	1	Herpestes_naso	Mammalia	Carnivora	Herpestidae	LC	Class C	2.9	Piège	Adulte	Frais	Masculin	Consommation propre	domestic
8	2019-02-22		4	48		12	2019-02-22	6	2019-02-22	18		matin	1	Hyemoschus_aquaticus	Mammalia	Artiodactyla	Tragulidae	LC	Class C	10.85	Piège	Adulte	Frais	Masculin	Vendu	selling	Revendeur/euse
9	2018-03-31	3	6	48			2018-03-31	8h	2018-03-31	soir	2018-03-31	Matin	1	Kinixys_erosa	Reptilia	Testudines	Testudinidae	DD	Class B	1.5	Autre	Adulte	Vivant		Consommation propre	domestic
9	2018-04-05	4	6	48		6	2018-04-05	6h	2018-04-05	12h	2018-04-05	matin	1	Kinixys_erosa	Reptilia	Testudines	Testudinidae	DD	Class B	1.5	Autre	Adulte	Vivant		Consommation propre	domestic
9	2018-04-10	4	6	48			2018-04-10	6h	2018-04-10	soir	2018-04-10	matin	1	Kinixys_erosa	Reptilia	Testudines	Testudinidae	DD	Class B	1.5	Autre	Adulte	Vivant		Consommation propre	domestic
9	2018-04-16	4	6	48			2018-04-16	matin	2018-04-16	midi	2018-04-16	matin	1	Kinixys_erosa	Reptilia	Testudines	Testudinidae	DD	Class B	1.5	Autre	Adulte	Vivant		Consommation propre	domestic
8	2018-11-26		4	48		125	2018-11-21	6	2018-11-26	11		matin	1	Kinixys_erosa	Reptilia	Testudines	Testudinidae	DD	Class B	1.5	Piège	Adulte	Vivant		Consommation propre	domestic
8	2018-12-08		4	48		4	2018-12-08	8	2018-12-08	12	2018-12-08	matin	1	Kinixys_erosa	Reptilia	Testudines	Testudinidae	DD	Class B	1.5	Piège	Adulte	Vivant		Consommation propre	domestic
8	2019-01-12		4	48		4	2019-01-12	8h	2019-01-12	12h	2019-01-12	matin	1	Kinixys_erosa	Reptilia	Testudines	Testudinidae	DD	Class B	1.5	Autre	Adulte	Vivant	?	Consommation propre	domestic
9	2018-05-05	5	6	48		10	2018-05-05	6h	2018-05-05	16h	2018-05-05	matin	1	Mandrillus_sphinx	Mammalia	Primates	Cercopithecidae	VU	Class A	18.25	Piège	Jeune	Vivant		Vendu	selling	Passant
8	2018-11-07		4	48		7	2018-11-07	6	2018-11-07	13	2018-11-07	matin	1	Mandrillus_sphinx	Mammalia	Primates	Cercopithecidae	VU	Class A	18.25	Piège	Jeune	Vivant	Masculin	Vendu	selling
8	2018-12-21		4	48		9	2018-12-21	7h	2018-12-21	16h	2018-12-21	matin	1	Mandrillus_sphinx	Mammalia	Primates	Cercopithecidae	VU	Class A	18.25	Fusil	Adulte	Frais	Masculin	Consommation propre et Vendu	both	Revendeur/euse
8	2019-02-24		4	48		6	2019-02-24	7	2019-02-24	13		matin	1	Mandrillus_sphinx	Mammalia	Primates	Cercopithecidae	VU	Class A	18.25	Fusil	Adulte	Frais	Masculin	Consommation propre et Vendu	both	Voisin
9	2018-04-28	4	6	48		11	2018-04-28	6h	2018-04-28	17h	2018-04-28	matin	1	Nandinia_binotata	Mammalia	Carnivora	Nandiniidae	LC	Class C	2
8	2019-01-20		4	48		10	2019-01-20	6h	2019-01-20	16h	2019-01-20	matin	1	Nandinia_binotata	Mammalia	Carnivora	Nandiniidae	LC	Class C	2	Piège	Adulte	Frais	Masculin	Vendu	selling	Voisin
8	2019-01-06		4	48		58	2019-01-04	6h	2019-01-06	16h	2019-01-04	soir	1	Osteolaemus_tetraspis	Reptilia	Crocodilia	Crocodylidae	VU	Class A		Piège	Adulte	Vivant	Feménin	Vendu	selling	Passant
9	2018-03-22	3	6	48		8.5	2018-03-22	6h30	2018-03-22	15h	2018-03-22	Matin	1	Phataginus_spp.	Mammalia	Pholidota	Manidae	VU/EN	Class C	2.425	Piège	Adulte	Vivant		À vendre	selling	Passant
9	2018-03-22	3	6	48		8.5	2018-03-22	6h30	2018-03-22	15h	2018-03-22	Matin	1	Phataginus_spp.	Mammalia	Pholidota	Manidae	VU/EN	Class C	2.425	Piège	Adulte	Frais		Consommation propre	domestic
8	2018-11-07		4	48		7	2018-11-07	6	2018-11-07	13	2018-11-07	matin	1	Phataginus_spp.	Mammalia	Pholidota	Manidae	VU/EN	Class C	2.425	Piège	Adulte	Vivant	Feménin	Consommation propre	domestic
8	2018-11-13		4	48		8	2018-11-13	6	2018-11-13	14	2018-11-13	matin	1	Phataginus_spp.	Mammalia	Pholidota	Manidae	VU/EN	Class C	2.425	Piège	Adulte	Vivant	Masculin	Vendu	selling
8	2019-01-20		4	48		10	2019-01-20	6h	2019-01-20	16h	2019-01-20	matin	1	Phataginus_spp.	Mammalia	Pholidota	Manidae	VU/EN	Class C	2.425	Piège	Jeune	Vivant	Masculin	Consommation propre	domestic
8	2019-02-05		4	48		6	2019-02-05	12	2019-02-05	18		soir	1	Phataginus_spp.	Mammalia	Pholidota	Manidae	VU/EN	Class C	2.425	Piège	Adulte	Vivant	Masculin	Vendu	selling	Voisin
8	2019-02-22		4	48		12	2019-02-22	6	2019-02-22	18		matin	1	Phataginus_spp.	Mammalia	Pholidota	Manidae	VU/EN	Class C	2.425	Piège	Adulte	Vivant	Feménin	Consommation propre	domestic
9	2018-03-24	3	6	48		8	2018-03-24	7h	2018-03-24	15h	2018-03-24	Matin	1	Philantomba_monticola	Mammalia	Artiodactyla	Bovidae	LC	Class C	6.25	Piège	Adulte	Frais		Vendu	selling	Voisin
9	2018-04-01	4	6	48		9	2018-04-01	6h	2018-04-01	15h	2018-04-01	matin	1	Philantomba_monticola	Mammalia	Artiodactyla	Bovidae	LC	Class C	6.25	Piège	Adulte	Frais		Vendu	selling	Revendeur/euse
9	2018-04-18	4	6	48			2018-04-18	Matin	2018-04-18	16h	2018-04-18	15h	1	Philantomba_monticola	Mammalia	Artiodactyla	Bovidae	LC	Class C	6.25	Piège	Adulte	Frais		Vendu	selling	Voisin
9	2018-04-23	4	6	48		9	2018-04-23	7h	2018-04-23	17h	2018-04-23	matin	1	Philantomba_monticola	Mammalia	Artiodactyla	Bovidae	LC	Class C	6.25	Piège	Jeune	Frais		Vendu	selling	Voisin
9	2018-04-23	4	6	48		9	2018-04-23	7h	2018-04-23	17h	2018-04-23	soir	1	Philantomba_monticola	Mammalia	Artiodactyla	Bovidae	LC	Class C	6.25	Piège	Adulte	Frais		Vendu	selling	Voisin
8	2019-01-06		4	48		58	2019-01-04	6h	2019-01-06	16h	2019-01-04	soir	1	Philantomba_monticola	Mammalia	Artiodactyla	Bovidae	LC	Class C	6.25	Piège	Adulte	Frais	Masculin	Consommation propre	domestic
8	2019-01-17		4	48		12	2019-01-17	7h	2019-01-17	19h	2019-01-17	matin	1	Philantomba_monticola	Mammalia	Artiodactyla	Bovidae	LC	Class C	6.25	Piège	Adulte	Décomposé	Masculin	Consommation propre	domestic
8	2019-01-30		4	48		24	2019-01-29	13	2019-01-30	13	2019-01-29	soir	1	Philantomba_monticola	Mammalia	Artiodactyla	Bovidae	LC	Class C	6.25	Fusil	Adulte	Boucané	Feménin	Vendu	selling	Voisin
8	2019-02-03		4	48		13	2019-02-03	6	2019-02-03	19		soir	1	Philantomba_monticola	Mammalia	Artiodactyla	Bovidae	LC	Class C	6.25	Piège	Adulte	Frais	Feménin	Vendu	selling	Voisin
8	2019-02-19		4	48		13	2019-02-19	5	2019-02-19	18		matin	1	Philantomba_monticola	Mammalia	Artiodactyla	Bovidae	LC	Class C	6.25	Piège	Jeune	Décomposé	Feménin	Consommation propre	domestic
8	2019-02-10		4	48		42	2019-02-08	15	2019-02-10	9	2019-02-08	soir	1	Potamochoerus_porcus	Mammalia	Artiodactyla	Suidae	LC	Class B	70	Fusil	Adulte	Boucané	Masculin	Consommation propre et Vendu	both	Revendeur/euse
8	2018-11-26		4	48		125	2018-11-21	6	2018-11-26	11		matin	1	Tragelaphus_spekeii	Mammalia	Artiodactyla	Bovidae	LC	Class B	78	Piège	Adulte	Boucané	Masculin	Consommation propre et Vendu	both
9	2018-04-25	4	6	48		8	2018-04-25	7h	2018-04-25	15h	2018-04-25	soir	1	unspecified_bird	Aves	unspecified_aves	unspecified_aves				Piège	Adulte	Vivant		Consommation propre	domestic
8	2018-11-07		4	48		7	2018-11-07	6	2018-11-07	13	2018-11-07	matin	1	Varanus_ornatus	Reptilia	Squamata	Varanidae	VU	Class B		Fusil	Adulte	Frais	Masculin	Vendu	selling
8	2018-11-26		4	48		125	2018-11-21	6	2018-11-26	11		matin	1	Varanus_ornatus	Reptilia	Squamata	Varanidae	VU	Class B		Piège	Adulte	Frais	Masculin	Vendu	selling
8	2019-01-12		4	48		4	2019-01-12	8h	2019-01-12	12h	2019-01-12	matin	1	Varanus_ornatus	Reptilia	Squamata	Varanidae	VU	Class B		Piège	Adulte	Frais	Feménin	Consommation propre et Vendu	both	Voisin
9	2018-04-08	4	6	48		9.5	2018-04-08	7h	2018-04-08	16h30			-1
9	2018-04-15	4	6	48		4	2018-04-15	8h	2018-04-15	12h			-1
9	2018-04-24	4	6	48		9	2018-04-24	6h	2018-04-24	17h			-1
9	2018-05-07	5	6	48		8	2018-05-07	7h	2018-05-07	15h			-1
8	2018-10-19		4	48		9	2018-10-19	7	2018-10-19	16			-1
8	2018-10-27		4	48		8	2018-10-27	7	2018-10-27	15			-1
8	2018-11-03		4	48		5	2018-11-03	7	2018-11-03	12			-1
8	2019-01-27		4	48		10	2019-01-27	8h	2019-01-27	18h	2019-01-27	rien	-1
8	2019-02-01		4	48		9	2019-02-01	6	2019-02-01	15			-1
8	2019-02-04		4	48		9	2019-02-04	7	2019-02-04	16			-1								Fusil
8	2019-02-14		4	48		12	2019-02-15	6	2019-02-15	18			-1								Piège
8	2019-02-25		4	48		7	2019-02-25	13	2019-02-25	20			-1
8	2018-11-21		4	48			2018-11-21	6					-1
8	2018-11-22		4	48									-1
8	2018-11-23		4	48									-1
8	2018-11-24		4	48									-1
8	2018-11-25		4	48									-1
8	2018-12-28		4	48			2018-12-28	9h					-1
8	2018-12-29		4	48									-1
8	2019-01-04		4	48			2019-01-04						-1
8	2019-01-14		4	48			2019-01-14	16h					-1
8	2019-01-15		4	48		18	2019-01-14	16h	2019-01-15	10h		rien	-1
8	2019-01-25		4	48									-1
8	2019-01-29		4	48			2019-01-29	13h					-1
8	2019-02-08		4	48									-1
8	2019-02-09		4	48									-1
9	2018-07-21	7	6	48		5	2018-07-21	11h	2018-07-21	16h	2018-07-21	soir	1	Agelastes_niger	Aves	Galliformes	Numididae		Class C		Piège	Adulte	Frais		Consommation propre	domestic
9	2018-07-02	7	6	48		6	2018-07-02	7h	2018-07-02	13h	2018-07-02	soir	1	Atherurus_africanus	Mammalia	Rodentia	Hystricidae	LC	Class C	1.93	Piège		Frais		Consommation propre	domestic
9	2018-07-21	7	6	48		5	2018-07-21	11h	2018-07-21	16h	2018-07-21	soir	1	Atherurus_africanus	Mammalia	Rodentia	Hystricidae	LC	Class C	1.93	Piège	Adulte	Frais		Consommation propre et Vendu	both	Voisin
9	2018-06-25	6	6	48		9	2018-06-25	7h	2018-06-25	16h	2018-06-25	matin	1	Caracal_aurata	Mammalia	Carnivora	Felidae	VU	unknown	10.65	Piège	Adulte	Frais		Consommation propre	domestic
9	2018-05-17	5	6	48		8	2018-05-17	7h	2018-05-17	15h	2018-05-17	matin	1	Cephalophus_callipygus	Mammalia	Artiodactyla	Bovidae	LC	Class B	18.25	Piège	Adulte	Frais		Consommation propre et Vendu	both	Revendeur/euse
9	2018-05-22	5	6	48		10.5	2018-05-22	5h30	2018-05-22	16h	2018-05-22	matin	1	Cephalophus_callipygus	Mammalia	Artiodactyla	Bovidae	LC	Class B	18.25	Piège	Adulte	Décomposé		À vendre	selling	Voisin
9	2018-06-25	6	6	48		9	2018-06-25	7h	2018-06-25	16h	2018-06-25	matin	1	Cephalophus_callipygus	Mammalia	Artiodactyla	Bovidae	LC	Class B	18.25	Piège	Adulte	Frais		À vendre	selling
9	2018-05-13	5	6	48		9	2018-05-12	6h	2018-05-12	15h	2018-05-12	matin	1	Cephalophus_dorsalis	Mammalia	Artiodactyla	Bovidae	NT	Class B	20	Piège	Adulte	Frais		Consommation propre et Vendu	both	Revendeur/euse
9	2018-05-22	5	6	48		10.5	2018-05-22	5h30	2018-05-22	16h	2018-05-22	matin	1	Cephalophus_dorsalis	Mammalia	Artiodactyla	Bovidae	NT	Class B	20	Piège	Adulte	Frais		À vendre	selling	Revendeur/euse
9	2018-06-01	6	6	48		11.5	2018-06-01	6h	2018-06-01	17h30	2018-06-01	matin	1	Cephalophus_dorsalis	Mammalia	Artiodactyla	Bovidae	NT	Class B	20	Piège	Adulte	Frais		Consommation propre et Vendu	both	Revendeur/euse
9	2018-05-09	5	6	48		11	2018-05-09	6h	2018-05-09	17h	2018-05-09		1	Cephalophus_silvicultor	Mammalia	Artiodactyla	Bovidae	NT	Class A	72.5	Piège	Adulte	Frais		Consommation propre et Vendu	both	Passant
9	2018-05-30	5	6	48		10	2018-05-30	6h	2018-05-30	16h	2018-05-30	Soir	1	Cercopithecus_cephus	Mammalia	Primates	Cercopithecidae	LC	Class C	3.485	Fusil	Adulte	Frais		Vendu	selling	Voisin
9	2018-07-02	7	6	48		6	2018-07-02	7h	2018-07-02	13h	2018-07-02	matin	1	Cercopithecus_nictitans	Mammalia	Primates	Cercopithecidae	NT	Class C	5.41	Fusil		Frais		Vendu	selling	Voisin
9	2018-06-08	6	6	48		11	2018-06-08	6h	2018-06-08	17h	2018-06-08	matin	1	Civettictis_civetta	Mammalia	Carnivora	Herpestidae	LC	Class B	12	Piège	Adulte			Consommation propre et Vendu	both	Voisin
9	2018-05-25	5	6	48		3.5	2018-05-25	8h30	2018-05-25	12h	2018-05-25	matin	1	Cricetomys_emini	Mammalia	Rodentia	Nesomyidae	LC	CLass C	1.3	Piège	Adulte	Frais
9	2018-07-09	7	6	48		6	2018-07-09	7h	2018-07-09	13h	2018-07-09	matin	1	Cricetomys_emini	Mammalia	Rodentia	Nesomyidae	LC	CLass C	1.3	Piège	Adulte	Frais		Consommation propre	domestic
9	2018-07-23	7	6	48		9	2018-07-23	7h	2018-07-23	16h	2018-07-23	matin	1	Cricetomys_emini	Mammalia	Rodentia	Nesomyidae	LC	CLass C	1.3	Piège	Adulte	Frais		Consommation propre	domestic
9	2018-05-13	5	6	48		9	2018-05-12	6h	2018-05-12	15h	2018-05-12	matin	1	Kinixys_erosa	Reptilia	Testudines	Testudinidae	DD	Class B	1.5	Autre	Adulte	Vivant		Consommation propre	domestic
9	2018-05-21	5	6	48		5	2018-05-22	7h	2018-05-22	12h	2018-05-22	matin	1	Kinixys_erosa	Reptilia	Testudines	Testudinidae	DD	Class B	1.5	Autre	Adulte	Vivant		Consommation propre	domestic
9	2018-06-08	6	6	48		11	2018-06-08	6h	2018-06-08	17h	2018-06-08	matin	1	Kinixys_erosa	Reptilia	Testudines	Testudinidae	DD	Class B	1.5	Autre	Adulte	Vivant		Consommation propre	domestic
9	2018-07-05	7	6	48		7	2018-07-05	7h	2018-07-05	14h	2018-07-05	matin	1	Lophocebus_albigena	Mammalia	Primates	Cercopithecidae	LC	Class C	7.69	Fusil	Adulte	Frais		Vendu	selling
9	2018-06-01	6	6	48		11.5	2018-06-01	6h	2018-06-01	17h30	2018-06-01	matin	1	Mandrillus_sphinx	Mammalia	Primates	Cercopithecidae	VU	Class A	18.25	Fusil	Adulte	Frais		Vendu	selling	Revendeur/euse
9	2018-06-28	6	6	48		10	2018-06-28	6h	2018-06-28	16h	2018-06-28	soir	1	Mandrillus_sphinx	Mammalia	Primates	Cercopithecidae	VU	Class A	18.25	Piège	Adulte	Frais		Consommation propre et À vendre	both	Voisin
9	2018-05-17	5	6	48		8	2018-05-17	7h	2018-05-17	15h	2018-05-17	Soir	1	Naja_nigricollis	Reptilia	Squamata	Elapidae	LC	Class B		Autre	Adulte	Frais		Consommation propre	domestic
9	2018-05-29	5	6	48		5	2018-05-29	7h	2018-05-29	12h	2018-05-29	matin	1	Nandinia_binotata	Mammalia	Carnivora	Nandiniidae	LC	Class C	2	Piège	Adulte	Frais		Vendu	selling	Voisin
9	2018-06-05	6	6	48		6	2018-06-05	7h	2018-06-05	13h	2018-06-05	matin	1	Nandinia_binotata	Mammalia	Carnivora	Nandiniidae	LC	Class C	2	Piège	Adulte	Frais		Vendu	selling	Voisin
9	2018-07-05	7	6	48		7	2018-07-05	7h	2018-07-05	14h	2018-07-05	matin	1	Nandinia_binotata	Mammalia	Carnivora	Nandiniidae	LC	Class C	2	Piège	Adulte	Frais		Vendu	selling
9	2018-07-05	7	6	48		7	2018-07-05	7h	2018-07-05	14h	2018-07-05	matin	1	Neotragus_batesi	Mammalia	Artiodactyla	Bovidae	LC		3	Piège	Jeune	Frais		Consommation propre	domestic
9	2018-07-21	7	6	48		5	2018-07-21	11h	2018-07-21	16h	2018-07-21	soir	1	Phataginus_spp.	Mammalia	Pholidota	Manidae	VU/EN	Class C	2.425	Autre	Adulte	Décomposé		Consommation propre	domestic
9	2018-05-29	5	6	48		5	2018-05-29	7h	2018-05-29	12h	2018-05-29	matin	1	Philantomba_monticola	Mammalia	Artiodactyla	Bovidae	LC	Class C	6.25	Piège	Adulte	Décomposé		Consommation propre	domestic
9	2018-06-21	6	6	48		10	2018-06-21	6h	2018-06-21	16h	2018-06-21		1	Philantomba_monticola	Mammalia	Artiodactyla	Bovidae	LC	Class C	6.25	Piège	Adulte	Frais		Vendu	selling	Voisin
9	2018-06-21	6	6	48		10	2018-06-21	6h	2018-06-21	16h	2018-06-21		1	Philantomba_monticola	Mammalia	Artiodactyla	Bovidae	LC	Class C	6.25	Piège	Adulte	Décomposé		Consommation propre	domestic
9	2018-05-19	5	6	48		8	2018-05-19	7h	2018-05-19	15h	2018-05-19	matin	1	Thryonomys_swinderianus	Mammalia	Rodentia	Thryonomyidae	LC	Class C	4.06	Piège	Adulte	Frais		Vendu	selling	Voisin
9	2018-05-09	5	6	48		11	2018-05-09	6h	2018-05-09	17h	2018-05-09		1	unspecified_mongoose	Mammalia	Carnivora	Herpestidae				Piège	Adulte	Frais		Consommation propre	domestic
9	2018-05-19	5	6	48		8	2018-05-19	7h	2018-05-19	15h	2018-05-19	matin	1	Varanus_ornatus	Reptilia	Squamata	Varanidae	VU	Class B	5	Piège	Adulte	Frais		Vendu	selling	Revendeur/euse
9	2018-06-12	6	6	48		9	2018-06-12	6h	2018-06-12	15h			-1
9	2018-06-16	6	6	48		9	2018-06-16	6h	2018-06-16	15h			-1
9	2018-07-07	7	6	48		9	2018-07-07	7h	2018-07-07	16h			-1
9	2018-07-19	7	6	48		6	2018-07-19	7h	2018-07-19	13h			-1
9	2018-05-28	5	1	49		4.5	2018-05-28	7h	2018-05-28	11h30	2018-05-28	matin	1	Agelastes_niger	Aves	Galliformes	Numididae		Class C		Piège	Adulte	Vivant		Consommation propre	domestic
9	2018-03-15	3	1	49		8	2018-03-15	6h	2018-03-15	14h	2018-03-15	Matin	1	Atherurus_africanus	Mammalia	Rodentia	Hystricidae	LC	Class C	1.93	Piège	Adulte	Frais		À vendre	selling	Commerçant
9	2018-03-24	3	1	49		5	2018-03-24	7h	2018-03-24	12h	2018-03-24	Matin	1	Atherurus_africanus	Mammalia	Rodentia	Hystricidae	LC	Class C	1.93	Piège	Adulte	Frais		À vendre	selling	Revendeur/euse
9	2018-04-09	4	1	49		4	2018-04-09	8h	2018-04-09	12h	2018-04-09	Matin	1	Atherurus_africanus	Mammalia	Rodentia	Hystricidae	LC	Class C	1.93	Piège	Adulte	Frais		Vendu	selling	Revendeur/euse
9	2018-04-16	4	1	49		3	2018-04-16	9h	2018-04-16	12h	2018-04-16	10h	1	Atherurus_africanus	Mammalia	Rodentia	Hystricidae	LC	Class C	1.93	Piège	Adulte	Frais		À vendre	selling	Passant
9	2018-05-11	5	1	49		10	2018-05-11	5h	2018-05-11	15h	2018-05-11	Soir	1	Atherurus_africanus	Mammalia	Rodentia	Hystricidae	LC	Class C	1.93	Piège	Adulte	Frais		Vendu	selling	Revendeur/euse
9	2018-05-17	5	1	49		3	2018-05-17	8h49	2018-05-17	11h50	2018-05-17	matin	1	Atherurus_africanus	Mammalia	Rodentia	Hystricidae	LC	Class C	1.93	Piège	Adulte	Frais		Consommation propre et À vendre	both	Voisin
9	2018-05-24	5	1	49		4.5	2018-05-24	7h	2018-05-24	11h30	2018-05-24	matin	1	Atherurus_africanus	Mammalia	Rodentia	Hystricidae	LC	Class C	1.93	Piège	Adulte	Frais		Vendu	selling	Voisin
9	2018-04-19	4	1	49		3	2018-04-19	8h	2018-04-19	11h	2018-04-19	Matin	1	Bitis_gabonica	Reptilia	Squamata	Viperidae	LC	Class C	3.5	Autre	Adulte	Frais		À vendre	selling	Voisin
9	2018-04-23	4	1	49			2018-04-23	matin	2018-04-23	12h	2018-04-23	matin	1	Bitis_gabonica	Reptilia	Squamata	Viperidae	LC	Class C	3.5	Autre	Adulte	Frais		Consommation propre	domestic
9	2018-05-11	5	1	49		10	2018-05-11	5h	2018-05-11	15h	2018-05-11	matin	1	Bitis_gabonica	Reptilia	Squamata	Viperidae	LC	Class C	3.5	Autre	Adulte	Frais		Consommation propre	domestic
9	2018-05-21	5	1	49		4	2018-05-21	7h	2018-05-21	11h	2018-05-21	matin	1	Bitis_gabonica	Reptilia	Squamata	Viperidae	LC	Class C	3.5	Piège	Adulte	Frais		Vendu	selling	Passant
9	2018-05-11	5	1	49		10	2018-05-11	5h	2018-05-11	15h	2018-05-11	matin	1	Cercopithecus_cephus	Mammalia	Primates	Cercopithecidae	LC	Class C	3.485	Piège	Adulte	Frais		Consommation propre	domestic
9	2018-05-30	5	1	49		6	2018-05-30	7h	2018-05-30	13	2018-05-30	matin	1	Civettictis_civetta	Mammalia	Carnivora	Herpestidae	LC	Class B	12	Piège	Adulte	Frais		Consommation propre	domestic
9	2018-03-11	3	1	49		4	2018-03-11	6h	2018-03-11	10h	2018-03-11	8h30	1	Cricetomys_emini	Mammalia	Rodentia	Nesomyidae	LC	CLass C	1.3	Piège	Jeune	Frais		Consommation propre	domestic
9	2018-03-12	3	1	49		2.5	2018-03-12	7h	2018-03-12	9h17	2018-03-12	8h30	1	Cricetomys_emini	Mammalia	Rodentia	Nesomyidae	LC	CLass C	1.3	Piège	Adulte	Frais		Consommation propre	domestic
9	2018-03-17	3	1	49		3	2018-03-17	7h	2018-03-17	10h	2018-03-17	9h	1	Cricetomys_emini	Mammalia	Rodentia	Nesomyidae	LC	CLass C	1.3	Piège	Adulte	Frais		Consommation propre	domestic
9	2018-03-18	3	1	49		4	2018-03-18	8h	2018-03-18	12h	2018-03-18	Matin	1	Cricetomys_emini	Mammalia	Rodentia	Nesomyidae	LC	CLass C	1.3	Piège	Adulte	Frais		Consommation propre	domestic
9	2018-03-21	3	1	49		4.5	2018-03-21	7h	2018-03-21	11h30		matin	1	Cricetomys_emini	Mammalia	Rodentia	Nesomyidae	LC	CLass C	1.3	Autre	Adulte	Frais		Vendu	selling	Voisin
9	2018-03-22	3	1	49		2	2018-03-22	11h	2018-03-22	13h	2018-03-22	midi	1	Cricetomys_emini	Mammalia	Rodentia	Nesomyidae	LC	CLass C	1.3	Piège	Adulte	Frais		Consommation propre	domestic
9	2018-03-26	3	1	49		4	2018-03-26	8h	2018-03-26	10h	2018-03-26	Matin	1	Cricetomys_emini	Mammalia	Rodentia	Nesomyidae	LC	CLass C	1.3	Piège	Jeune	Frais		Consommation propre	domestic
9	2018-04-01	4	1	49		3	2018-04-01	7h	2018-04-01	10h	2018-04-01	matin	1	Cricetomys_emini	Mammalia	Rodentia	Nesomyidae	LC	CLass C	1.3	Piège	Adulte	Frais		Consommation propre	domestic
9	2018-04-05	4	1	49		3	2018-04-05	8h	2018-04-05	11h		Matin	1	Cricetomys_emini	Mammalia	Rodentia	Nesomyidae	LC	CLass C	1.3	Piège	Adulte	Décomposé		Consommation propre	domestic
9	2018-04-07	4	1	49		5	2018-04-07	7h	2018-04-07	12h	2018-04-07	matin	1	Cricetomys_emini	Mammalia	Rodentia	Nesomyidae	LC	CLass C	1.3	Piège	Adulte	Frais		Vendu	selling	Passant
9	2018-04-16	4	1	49		3	2018-04-16	9h	2018-04-16	12h	2018-04-16	10h	1	Cricetomys_emini	Mammalia	Rodentia	Nesomyidae	LC	CLass C	1.3	Piège	Adulte	Frais		Consommation propre	domestic
9	2018-04-19	4	1	49		3	2018-04-19	8h	2018-04-19	11h	2018-04-19	Matin	1	Cricetomys_emini	Mammalia	Rodentia	Nesomyidae	LC	CLass C	1.3	Piège	Adulte	Frais		Consommation propre	domestic
9	2018-04-20	4	1	49		4	2018-04-20	7h	2018-04-20	11h	2018-04-20	Matin	1	Cricetomys_emini	Mammalia	Rodentia	Nesomyidae	LC	CLass C	1.3	Piège	Adulte	Frais		Consommation propre	domestic
9	2018-04-25	4	1	49		5	2018-04-25	7h	2018-04-25	12h	2018-04-25	matin	1	Cricetomys_emini	Mammalia	Rodentia	Nesomyidae	LC	CLass C	1.3	Piège	Adulte	Frais		Consommation propre	domestic
9	2018-05-07	5	1	49		5	2018-05-07	7h	2018-05-07	12h	2018-05-07	Matin	1	Cricetomys_emini	Mammalia	Rodentia	Nesomyidae	LC	CLass C	1.3	Piège	Adulte	Frais		Consommation propre	domestic
9	2018-05-16	5	1	49		5	2018-05-16	7h	2018-05-16	12h	2018-05-16	matin	1	Cricetomys_emini	Mammalia	Rodentia	Nesomyidae	LC	CLass C	1.3	Piège	Adulte	Frais		Consommation propre	domestic
9	2018-05-31	5	1	49		5	2018-05-31	7h	2018-05-31	12	2018-05-31	matin	1	Cricetomys_emini	Mammalia	Rodentia	Nesomyidae	LC	CLass C	1.3	Autre	Adulte	Frais		Consommation propre	domestic
9	2018-06-03	6	1	49		5	2018-06-03	7h	2018-06-03	12h	2018-06-03	matin	1	Cricetomys_emini	Mammalia	Rodentia	Nesomyidae	LC	CLass C	1.3	Piège	Adulte	Frais		Consommation propre	domestic
9	2018-06-08	6	1	49		4	2018-06-08	7h	2018-06-08	11h	2018-06-08	matin	1	Cricetomys_emini	Mammalia	Rodentia	Nesomyidae	LC	CLass C	1.3	Piège	Adulte	Frais		Consommation propre	domestic
9	2018-06-10	6	1	49		4	2018-06-10	7h	2018-06-10	11h	2018-06-10	matin	1	Cricetomys_emini	Mammalia	Rodentia	Nesomyidae	LC	CLass C	1.3	Piège	Adulte	Décomposé		Consommation propre	domestic
9	2018-05-16	5	1	49		5	2018-05-16	7h	2018-05-16	12h	2018-05-16	matin	1	Crossarchus_obscurus	Mammalia	Carnivora	Herpestidae	LC		1.25	Piège	Adulte	Frais		Consommation propre	domestic
9	2018-05-05	5	1	49		5	2018-05-05	8h	2018-05-05	13h	2018-05-05	matin	1	Dendroaspis_jamesoni	Reptilia	Squamata	Elapidae	LC	Class C		Autre	Adulte	Frais		Consommation propre	domestic
9	2018-05-24	5	1	49		4.5	2018-05-24	7h	2018-05-24	11h30	2018-05-24	matin	1	Genetta_servalina	Mammalia	Carnivora	Herpestidae	LC	Class B	1.055	Piège	Jeune	Décomposé		Consommation propre	domestic
9	2018-03-20	3	1	49		4	2018-03-20	7h	2018-03-20	11h	2018-03-20	10h	1	Kinixys_erosa	Reptilia	Testudines	Testudinidae	DD	Class B	1.5	Autre	Adulte	Vivant		Consommation propre	domestic
9	2018-04-30	4	1	49		3	2018-04-30	8h	2018-04-30	11h	2018-04-30	matin	1	Kinixys_erosa	Reptilia	Testudines	Testudinidae	DD	Class B	1.5	Autre	Adulte	Vivant		Consommation propre	domestic
9	2018-05-04	5	1	49		5	2018-05-04	7h	2018-05-04	12h	2018-05-04	matin	1	Kinixys_erosa	Reptilia	Testudines	Testudinidae	DD	Class B	1.5	Autre	Adulte	Vivant		Consommation propre	domestic
9	2018-05-30	5	1	49		6	2018-05-30	7h	2018-05-30	13	2018-05-30	matin	1	Kinixys_erosa	Reptilia	Testudines	Testudinidae	DD	Class B	1.5	Autre	Adulte	Vivant		Consommation propre	domestic
9	2018-06-10	6	1	49		4	2018-06-10	7h	2018-06-10	11h	2018-06-10	matin	1	Kinixys_erosa	Reptilia	Testudines	Testudinidae	DD	Class B	1.5	Piège	Adulte	Vivant		Consommation propre	domestic
9	2018-05-21	5	1	49		4	2018-05-21	7h	2018-05-21	11h	2018-05-21	matin	1	Peliperdix_lathami/Pternistis_squamatus	Aves	Galliformes	Phasianidae	LC		0.269	Piège	Adulte	Vivant		Consommation propre	domestic
9	2018-05-26	5	1	49		5	2018-05-26	7h	2018-05-26	12h	2018-05-26	matin	1	Phataginus_spp.	Mammalia	Pholidota	Manidae	VU/EN	Class C	2.425	Piège	Adulte	Vivant		Vendu	selling	Revendeur/euse
9	2018-03-28	3	1	49		4	2018-03-28	7h	2018-03-28	11h	2018-03-28	Matin	1	Thryonomys_swinderianus	Mammalia	Rodentia	Thryonomyidae	LC	Class C	4.06	Piège	Adulte	Frais		À vendre	selling	Revendeur/euse
9	2018-04-05	4	1	49		3	2018-04-05	8h	2018-04-05	11h	2018-04-05	Matin	1	Thryonomys_swinderianus	Mammalia	Rodentia	Thryonomyidae	LC	Class C	4.06	Piège	Jeune	Frais		Vendu	selling	Voisin
9	2018-04-09	4	1	49		4	2018-04-09	8h	2018-04-09	12h	2018-04-09	Matin	1	Thryonomys_swinderianus	Mammalia	Rodentia	Thryonomyidae	LC	Class C	4.06	Piège	Jeune	Frais		Consommation propre	domestic
9	2018-04-14	4	1	49		5	2018-04-14	7h	2018-04-14	12h	2018-04-14	10h	1	Thryonomys_swinderianus	Mammalia	Rodentia	Thryonomyidae	LC	Class C	4.06	Piège	Adulte	Frais		Vendu	selling	Revendeur/euse
9	2018-05-04	5	1	49		5	2018-05-04	7h	2018-05-04	12h	2018-05-04	matin	1	Thryonomys_swinderianus	Mammalia	Rodentia	Thryonomyidae	LC	Class C	4.06	Piège	Adulte	Frais		Vendu	selling	Passant
9	2018-03-18	3	1	49		4	2018-03-18	8h	2018-03-18	12h	2018-03-18	Midi	1	unspecified_bird	Aves	unspecified_aves	unspecified_aves				Piège	Adulte	Frais		Consommation propre	domestic
9	2018-03-21	3	1	49		4.5	2018-03-21	7h	2018-03-21	11h30	2018-03-21	9h	1	unspecified_bird	Aves	unspecified_aves	unspecified_aves				Piège	Jeune	Vivant		Consommation propre	domestic
9	2018-03-31	3	1	49		4	2018-03-31	7h	2018-03-31	11h	2018-03-31	Matin	1	unspecified_bird	Aves	unspecified_aves	unspecified_aves				Autre	Jeune	Vivant		Consommation propre	domestic
9	2018-04-01	4	1	49		3	2018-04-01	7h	2018-04-01	10h	2018-04-01	matin	1	unspecified_bird	Aves	unspecified_aves	unspecified_aves				Piège	Adulte	Vivant		Vendu	selling	Voisin
9	2018-04-20	4	1	49		4	2018-04-20	7h	2018-04-20	11h	2018-04-20	Matin	1	unspecified_bird	Aves	unspecified_aves	unspecified_aves				Piège	Jeune	Vivant		Consommation propre	domestic
9	2018-03-21	3	1	49		4.5	2018-03-21	7h	2018-03-21	11h30		matin	1	unspecified_snake	Reptilia	Squamata	unspecified_squamata				Piège	Jeune	Frais		Consommation propre	domestic
9	2018-03-28	3	1	49		4	2018-03-28	7h	2018-03-28	11h	2018-03-28	10h	1	unspecified_snake	Reptilia	Squamata	unspecified_squamata				Autre	Adulte	Frais		Consommation propre	domestic
9	2018-05-10	5	1	49		7	2018-05-10	7h	2018-05-10	14h	2018-05-10	matin	1	unspecified_spotted_fowl	Aves	Galliformes	Numididae				Piège	Adulte	Vivant		Consommation propre	domestic
9	2018-04-23	4	1	49			2018-04-23	matin	2018-04-23	12h	2018-04-23	Matin	1	Varanus_ornatus	Reptilia	Squamata	Varanidae	VU	Class B	5	Piège	Adulte	Frais		Vendu	selling	Revendeur/euse
9	2018-03-14	3	1	49		5	2018-03-14	8h	2018-03-14	13h			-1
9	2018-03-19	3	1	49		3	2018-03-19	7h	2018-03-19	10h			-1
9	2018-04-02	4	1	49		3	2018-04-02	7h	2018-04-02	10h			-1
9	2018-04-03	4	1	49		3	2018-04-03	7h	2018-04-03	10h			-1
9	2018-04-17	4	1	49			2018-04-17	matin	2018-04-17	11h			-1
9	2018-04-24	4	1	49		4.5	2018-04-24	7h30	2018-04-24	12h			-1
9	2018-04-28	4	1	49		5	2018-04-28	7h	2018-04-28	12h			-1
9	2018-05-12	5	1	49		4.5	2018-05-12	7h30	2018-05-12	12h			-1
2	2018-12-01		2	50		5	2018-12-01	8	2018-12-01	13	2018-12-01	matin	1	Atherurus_africanus	Mammalia	Rodentia	Hystricidae	LC	Class C	1.93	Piège	Jeune	Frais	Feménin	Vendu	selling	Voisin
2	2019-01-10		2	50		7	2019-01-10	7h	2019-01-10	14h	2019-01-10	matin	1	Atherurus_africanus	Mammalia	Rodentia	Hystricidae	LC	Class C	1.93	Piège	Adulte	Frais	Masculin	Vendu	selling	Voisin
2	2019-02-23		2	50		4	2019-02-23	9	2019-02-23	13			1	Bitis_gabonica	Reptilia	Squamata	Viperidae	LC	Class C	3.5	Autre	Adulte	Frais	Feménin	Consommation propre	domestic
2	2018-10-28		2	50		6	2018-10-28	7	2018-10-28	13	2018-10-28	matin	1	Cephalophus_callipygus	Mammalia	Artiodactyla	Bovidae	LC	Class B	18.25	Piège	Adulte	Frais	Masculin	Consommation propre et Vendu	both	Voisin
2	2018-12-22		2	50		6	2018-12-22	7h	2018-12-22	13h	2018-12-22	matin	1	Cephalophus_dorsalis	Mammalia	Artiodactyla	Bovidae	NT	Class B	20	Piège	Jeune	Frais	Masculin	Consommation propre et Vendu	both	Voisin
2	2019-01-14		2	50		7	2019-01-14	7h	2019-01-14	14h	2019-01-14	matin	1	Cephalophus_dorsalis	Mammalia	Artiodactyla	Bovidae	NT	Class B	20	Piège	Adulte	Frais	Feménin	Consommation propre et Vendu	both	Passant
2	2019-02-14		2	50		6	2019-02-14	10	2019-02-14	16		jour	1	Cephalophus_dorsalis	Mammalia	Artiodactyla	Bovidae	NT	Class B	20	Chien	Adulte	Frais	Feménin	Consommation propre et Vendu	both
2	2018-10-30		2	50		5	2018-10-30	7	2018-10-30	12	2018-10-30	matin	1	Cercopithecus_cephus	Mammalia	Primates	Cercopithecidae	LC	Class C	3.485	Fusil	Adulte	Frais	Feménin	Vendu	selling	Voisin
2	2019-01-10		2	50		7	2019-01-10	7h	2019-01-10	14h	2019-01-10	matin	1	Cercopithecus_cephus	Mammalia	Primates	Cercopithecidae	LC	Class C	3.485	Piège	Adulte	Décomposé	Feménin	Consommation propre	domestic
2	2018-12-05		2	50		6	2018-12-05	6	2018-12-05	12	2018-12-05	matin	1	Cricetomys_emini	Mammalia	Rodentia	Nesomyidae	LC	Class C	1.3	Piège	Adulte	Décomposé	Feménin	Consommation propre	domestic
2	2018-12-27		2	50		5	2018-12-27	8h	2018-12-27	13h	2018-12-27	matin	1	Cricetomys_emini	Mammalia	Rodentia	Nesomyidae	LC	Class C	1.3	Piège	Jeune	Décomposé	Masculin	Consommation propre	domestic
2	2018-11-08		2	50		6	2018-11-08	7	2018-11-08	13	2018-11-08	jour	1	Kinixys_erosa	Reptilia	Testudines	Testudinidae	DD	Class B	1.5	Piège	Jeune	Vivant	Feménin	Consommation propre	domestic
2	2018-10-22		2	50		5	2018-10-22	8	2018-10-22	13	2018-10-22	matin	1	Philantomba_monticola	Mammalia	Artiodactyla	Bovidae	LC	Class C	6.25	Piège	Jeune	Frais	Masculin	Consommation propre	domestic
2	2018-11-22		2	50		3	2018-11-22	12	2018-11-22	15	2018-11-22	jour	1	Philantomba_monticola	Mammalia	Artiodactyla	Bovidae	LC	Class C	6.25	Chien	Adulte	Frais	Feménin	Consommation propre	domestic
2	2018-12-22		2	50		6	2018-12-22	7h	2018-12-22	13h	2018-12-22	matin	1	Philantomba_monticola	Mammalia	Artiodactyla	Bovidae	LC	Class C	6.25	Piège	Adulte	Décomposé	Masculin	Consommation propre	domestic
2	2019-01-22		2	50		7	2019-01-22	7h	2019-01-22	14h	2019-01-22	jour	1	Philantomba_monticola	Mammalia	Artiodactyla	Bovidae	LC	Class C	6.25	Piège	Adulte	Décomposé	Feménin	Consommation propre	domestic
2	2019-01-14		2	50		7	2019-01-14	7h	2019-01-14	14h	2019-01-14	matin	1	Potamochoerus_porcus	Mammalia	Artiodactyla	Suidae	LC	Class B	70	Piège	Jeune	Frais	Feménin	Consommation propre et Vendu	both	Voisin
2	2018-11-18		2	50		5	2018-11-18	7	2018-11-18	12			-1
2	2018-11-27		2	50		5	2018-11-27	7	2018-11-27	12			-1
2	2019-02-01		2	50		7	2019-02-01	7	2019-02-01	14			-1
2	2018-11-14		2	50		6	2018-11-14	7	2018-11-14	13	2018-11-14		-1
8	2019-02-04		6	51		6	2019-02-04	13	2019-02-04	19		matin	1	Atherurus_africanus	Mammalia	Rodentia	Hystricidae	LC	Class C	1.93
8	2019-02-12		6	51		6	2019-02-12	13	2019-02-12	19		soir	1	Atherurus_africanus	Mammalia	Rodentia	Hystricidae	LC	Class C	1.93	Piège	Jeune	Décomposé	Masculin	Consommation propre	domestic
8	2019-01-28		6	51		9	2019-01-28	7h	2019-01-28	16h	2019-01-28	matin	1	Bitis_gabonica	Reptilia	Squamata	Viperidae	LC	Class C	3.5	Autre	Adulte	Frais	?	Consommation propre	domestic
8	2019-02-05		6	51		9	2019-02-05	12	2019-02-05	21		nuit	1	Cephalophus_dorsalis	Mammalia	Artiodactyla	Bovidae	NT	Class B	20	Fusil		Frais	Feménin	Consommation propre et Vendu	both
8	2019-01-11		6	51		8	2019-01-11	7h	2019-01-11	15h	2019-01-11	matin	1	Cephalophus_silvicultor	Mammalia	Artiodactyla	Bovidae	NT	Class A	72.5	Piège	Adulte	Frais	Masculin	Consommation propre et Vendu	both	Voisin
8	2018-12-31		6	51		8	2018-12-31	8h	2018-12-31	16h	2018-12-31	matin	1	Cercocebus_agilis	Mammalia	Primates	Cercopithecidae	LC	Class A	8	Fusil	Adulte	Frais	Masculin	Consommation propre	domestic
8	2019-02-03		6	51		8	2019-02-03	8	2019-02-03	16		soir	1	Cercopithecus_nictitans	Mammalia	Primates	Cercopithecidae	NT	Class C	5.41	Fusil	Adulte	Frais	Masculin	Vendu	selling	Revendeur/euse
8	2019-02-15		6	51		8	2019-02-15	7	2019-02-15	15		soir	1	Cercopithecus_nictitans	Mammalia	Primates	Cercopithecidae	NT	Class C	5.41	Fusil	Jeune	Frais	Feménin	Consommation propre	domestic
8	2019-01-04		6	51		3	2019-01-04	8h	2019-01-04	11h	2019-01-04	matin	1	Civettictis_civetta	Mammalia	Carnivora	Herpestidae	LC	Class B	12	Piège	Adulte	Frais	Masculin	Consommation propre	domestic
8	2019-02-09		6	51		6	2019-02-09	12	2019-02-09	18		soir	1	Colobus_guereza	Mammalia	Primates	Cercopithecidae	LC	Class A	10.2	Fusil	Adulte	Frais	Masculin	Vendu	selling	Passant
8	2019-02-26		6	51		12	2019-02-26	4	2019-02-26	16		soir	1	Herpestes_naso	Mammalia	Carnivora	Herpestidae	LC	Class C	2.9	Piège	Jeune	Décomposé	Feménin	Consommation propre	domestic
8	2019-01-31		6	51		4	2019-01-31	8	2019-01-31	12		matin	1	Kinixys_erosa	Reptilia	Testudines	Testudinidae	DD	Class B	1.5	Autre	Adulte	Vivant		Consommation propre	domestic
8	2019-02-22		6	51		9	2019-02-22	5	2019-02-22	14		soir	1	Kinixys_erosa	Reptilia	Testudines	Testudinidae	DD	Class B	1.5	Autre	Adulte	Vivant		Consommation propre	domestic
8	2019-01-16		6	51		4	2019-01-16	8h	2019-01-16	12h	2019-01-16	matin	1	Naja_nigricollis	Reptilia	Squamata	Elapidae	LC	Class B		Autre	Adulte			Consommation propre	domestic
8	2019-02-14		6	51		5	2019-02-14	12	2019-02-14	17		soir	1	Philantomba_monticola	Mammalia	Artiodactyla	Bovidae	LC	Class C	6.25	Piège	Adulte	Frais	Masculin	Vendu	selling	Voisin
8	2019-02-26		6	51		12	2019-02-26	4	2019-02-26	16		matin	1	Philantomba_monticola	Mammalia	Artiodactyla	Bovidae	LC	Class C	6.25	Piège	Adulte	Frais	Feménin	Vendu	selling	Revendeur/euse
8	2019-02-26		6	51		12	2019-02-26	4	2019-02-26	16		soir	1	Tragelaphus_spekeii	Mammalia	Artiodactyla	Bovidae	LC	Class B	78	Piège	Adulte	Frais	Masculin	Consommation propre et Vendu	both	Revendeur/euse
8	2019-02-17		6	51		4	2019-02-17	8	2019-02-17	12			-1
8	2019-02-19		6	51		4	2019-02-19	8	2019-02-19	12			-1
8	2019-02-24		6	51		5	2019-02-24	7	2019-02-24	12			-1
5	2018-05-11	5	2	52		2.5	2018-05-11	9h31	2018-05-11	12h14	2018-05-11		1	Atherurus_africanus	Mammalia	Rodentia	Hystricidae	LC	Class C	1.93	Piège	Adulte	Frais		Consommation propre	domestic
5	2018-05-22	5	2	52		3	2018-05-22	7h	2018-05-22	10h	2018-05-22	Matin	1	Atherurus_africanus	Mammalia	Rodentia	Hystricidae	LC	Class C	1.93	Piège	Adulte	Frais		Consommation propre	domestic
5	2018-05-28	5	2	52		3	2018-05-28	7h	2018-05-28	10h	2018-05-28	Matin	1	Atherurus_africanus	Mammalia	Rodentia	Hystricidae	LC	Class C	1.93	Piège	Adulte	Frais		Consommation propre	domestic
5	2018-05-30	5	2	52		5	2018-05-30	7h	2018-05-30	12h	2018-05-30	Matin	1	Cephalophus_callipygus	Mammalia	Artiodactyla	Bovidae	LC	Class B	18.25	Piège	Jeune	Frais		Consommation propre et Vendu	both
5	2018-07-18	7	2	52		4	2018-07-18	6h	2018-07-18	10h	2018-07-18	matin	1	Cephalophus_callipygus	Mammalia	Artiodactyla	Bovidae	LC	Class B	18.25	Piège	Jeune	Frais		Consommation propre et Vendu	both	Voisin
5	2018-05-15	5	2	52		4	2018-05-15	8h00	2018-05-15	12h	2018-05-15	Matin	1	Cephalophus_dorsalis	Mammalia	Artiodactyla	Bovidae	NT	Class B	20	Piège	Jeune	Frais		Consommation propre et À vendre	both
5	2018-06-25	6	2	52		4	2018-06-25	8h	2018-06-25	12h	2018-06-25	matin	1	Cephalophus_dorsalis	Mammalia	Artiodactyla	Bovidae	NT	Class B	20	Piège	Adulte	Frais		consommation propre et à vendre	both	Voisin
5	2018-03-30	3	2	52		7	2018-03-30	7h	2018-03-30	14h	2018-03-30		1	Cephalophus_silvicultor	Mammalia	Artiodactyla	Bovidae	NT	Class A	72.5	Piège	Adulte			Consommation propre et À vendre	both	Moto man
5	2018-04-25	4	2	52		3.5	2018-04-25	6h30	2018-04-25	10h	2018-04-25		1	Cephalophus_spp.	Mammalia	Artiodactyla	Bovidae	various	Class B	16.21	Piège	Adulte	Décomposé		Consommation propre	domestic
5	2018-05-15	5	2	52		4	2018-05-15	8h00	2018-05-15	12h	2018-05-15	Matin	1	Cricetomys_emini	Mammalia	Rodentia	Nesomyidae	LC	CLass C	1.3	Piège	Jeune	Décomposé		Consommation propre	domestic
5	2018-04-23	4	2	52		4	2018-04-23	6h	2018-04-23	10h	2018-04-23		1	Phataginus_spp.	Mammalia	Pholidota	Manidae	VU/EN	Class C	2.425	Piège	Adulte	Frais		Consommation propre	domestic
5	2018-03-20	3	2	52		5	2018-03-20	19h	2018-03-20	24h	2018-03-20	22h	1	Philantomba_monticola	Mammalia	Artiodactyla	Bovidae	LC	Class C	6.25	Fusil	adulte	Frais		Consommation propre	domestic
5	2018-06-17	6	2	52		5	2018-06-17	7h	2018-06-17	12h	2018-06-17	Matin	1	Philantomba_monticola	Mammalia	Artiodactyla	Bovidae	LC	Class C	6.25	Piège	Jeune	Frais		consommation propre	domestic
5	2018-05-26	5	2	52		3	2018-05-26	7h	2018-05-26	10h	2018-05-26	Matin	1	Potamochoerus_porcus	Mammalia	Artiodactyla	Suidae	LC	Class B	70	Piège	Jeune	Frais		Consommation propre et Vendu	both	Passant
5	2018-03-10	3	2	52		55	2018-03-07	8h	2018-03-09	15h	2018-03-08	7h	1	unspecified_monkey	Mammalia	Primates	unspecified_primates				Fusil		Boucané		à vendre	selling	Revendeur/euse
5	2018-03-11	3	2	52		6	2018-03-11	10h	2018-03-11	16h			-1
5	2018-03-18	3	2	52		5	2018-03-17	18h	2018-03-17	23h			-1
5	2018-03-21	3	2	52		8	2018-03-21	9h	2018-03-21	17h			-1
5	2018-03-27	3	2	52		8	2018-03-27	7h	2018-03-27	15h			-1
5	2018-04-06	4	2	52			2018-04-06	7h					-1
5	2018-04-10	4	2	52		6	2018-04-10	6h	2018-04-10	12h			-1
5	2018-04-15	4	2	52		5	2018-04-15	7h	2018-04-15	12h			-1
5	2018-04-16	4	2	52			2018-04-16		2018-04-16	12h			-1
5	2018-04-19	4	2	52		4	2018-04-19	6h30	2018-04-19	10h30			-1
5	2018-04-28	4	2	52		6	2018-04-28	6h45	2018-04-28	12h45			-1
5	2018-05-01	5	2	52		7.5	2018-05-01	6h30	2018-05-01	14h			-1
5	2018-05-03	5	2	52		3.5	2018-05-03	6h17	2018-05-03	10h09			-1
5	2018-05-05	5	2	52		3.5	2018-05-05	7h38	2018-05-05	11h11			-1
5	2018-05-07	5	2	52		4.5	2018-05-07	6h30	2018-05-07	11h			-1
5	2018-05-09	5	2	52		3	2018-05-09	7h	2018-05-09	10h			-1
5	2018-05-13	5	2	52		5	2018-05-13	9h	2018-05-13	14h			-1
5	2018-05-17	5	2	52		4	2018-05-17	7h	2018-05-17	11h			-1
5	2018-05-19	5	2	52		3	2018-05-19	7h	2018-05-19	10h			-1
5	2018-05-21	5	2	52		4.5	2018-05-21	6h30	2018-05-21	11h			-1
5	2018-05-23	5	2	52		4	2018-05-23	6h35	2018-05-23	10h30			-1
5	2018-05-25	5	2	52		4	2018-05-25	7h	2018-05-25	11h			-1
5	2018-06-01	6	2	52		4	2018-06-01	7h	2018-06-01	11h			-1
5	2018-06-30	6	2	52		3	2018-06-30	7h	2018-06-30	10h			-1
5	2018-07-07	7	2	52		3	2018-07-07	7h	2018-07-07	10h			-1
5	2018-07-10	7	2	52		4	2018-07-10	7h	2018-07-10	11h			-1
5	2018-06-10	6	2	52		8	2018-06-10	6h	2018-06-10	14h			-1
5	2018-06-11	6	2	52		7	2018-06-11	7h	2018-06-11	14h			-1
5	2018-06-22	6	2	52		5	2018-06-22	7h	2018-06-22	12h		Rien	-1
6	2018-05-02	5	4	53		9	2018-05-02	9h	2018-05-02	18h10	2018-05-02	11h	1	Atherurus_africanus	Mammalia	Rodentia	Hystricidae	LC	Class C	1.93	Piège	Adulte	Vivant		Vendu	selling	Bantou
6	2018-05-11	5	4	53		9	2018-05-11	7h	2018-05-11	16h	2018-05-11	matin	1	Atherurus_africanus	Mammalia	Rodentia	Hystricidae	LC	Class C	1.93	Piège	Adulte	Décomposé		consommation propre	domestic
6	2018-05-22	5	4	53		8	2018-05-22	8h	2018-05-22	16h	2018-05-22	soir	1	Atherurus_africanus	Mammalia	Rodentia	Hystricidae	LC	Class C	1.93	Piège	Adulte	Décomposé		consommation propre	domestic
6	2018-06-10	6	4	53		10	2018-06-10	8h	2018-06-10	18h	2018-06-10	soir	1	Cephalophus_dorsalis	Mammalia	Artiodactyla	Bovidae	NT	Class B	20	Piège	Adulte	Frais		Consommation propre et Vendu	both	Bantou
6	2018-06-01	6	4	53		10	2018-06-01	8h	2018-06-01	18h	2018-06-01	soir	1	Cercopithecus_nictitans	Mammalia	Primates	Cercopithecidae	NT	Class C	5.41	Fusil	Adulte	Frais		consommation propre	domestic
6	2018-06-05	6	4	53		7	2018-06-05	8h	2018-06-05	15h	2018-05-05	matin	1	Cricetomys_emini	Mammalia	Rodentia	Nesomyidae	LC	CLass C	1.3	Piège	Adulte	Frais		Consommation propre	domestic
6	2018-05-18	5	4	53		10	2018-05-18	7h	2018-05-18	17h	2018-05-18	soir	1	Philantomba_monticola	Mammalia	Artiodactyla	Bovidae	LC	Class C	6.25	Piège	Adulte	Décomposé		consommation propre	domestic
6	2018-06-20	6	4	53		3	2018-06-20	7h	2018-06-20	10h	2018-06-20	jour	1	Philantomba_monticola	Mammalia	Artiodactyla	Bovidae	LC	Class C	6.25	Piège	Adulte	Frais		Consommation propre	domestic
6	2018-04-06	4	4	53		10	2018-04-06	8h30	2018-04-06	18h30			-1
10	2019-02-10		8	55		8	2019-02-10	7	2019-02-10	15		matin	1	Atherurus_africanus	Mammalia	Rodentia	Hystricidae	LC	Class C	1.93	Autre	Adulte	Vivant	Feménin	Vendu	selling	Voisin
10	2019-02-22		8	55		11	2019-02-22	8	2019-02-22	17		matin	1	Atherurus_africanus	Mammalia	Rodentia	Hystricidae	LC	Class C	1.93	Autre			Masculin	Consommation propre	domestic
10	2018-11-08		8	55		9	2018-11-08	7	2018-11-08	16	2018-11-08	matin	1	Cephalophus_callipygus	Mammalia	Artiodactyla	Bovidae	LC	Class B	18.25	Piège	Jeune	Frais	Feménin	Consommation propre et Vendu	both
10	2019-01-22		8	55		7	2019-01-22	7h	2019-01-22	14h	2019-01-22	matin	1	Cephalophus_callipygus	Mammalia	Artiodactyla	Bovidae	LC	Class B	18.25	Piège	Adulte	Frais	Masculin	Consommation propre et Vendu	both	Revendeur/euse
10	2018-11-03		8	55		9.5	2018-11-03	6h30	2018-11-03	16	2018-11-03	matin	1	Cephalophus_dorsalis	Mammalia	Artiodactyla	Bovidae	NT	Class B	20	Piège	Adulte	Frais	Feménin	Consommation propre et Vendu	both
10	2019-01-26		8	55		8	2019-01-26	7h	2019-01-26	15h	2019-01-26	matin	1	Cephalophus_dorsalis	Mammalia	Artiodactyla	Bovidae	NT	Class B	20	Fusil	Adulte	Frais	Feménin	Consommation propre et Vendu	both	Voisin
10	2019-02-06		8	55		7	2019-02-05	19	2019-02-06	2		nuit	1	Cephalophus_dorsalis	Mammalia	Artiodactyla	Bovidae	NT	Class B	20	Fusil	Adulte	Frais	Feménin	Vendu	selling	bayam sellam
10	2018-10-26		8	55		14	2018-10-26	19	2018-10-26	9h	2018-10-26	matin	1	Cercopithecus_nictitans	Mammalia	Primates	Cercopithecidae	NT	Class C	5.41	Fusil	Adulte	Frais	Feménin	Vendu	selling
10	2018-11-11		8	55		4	2018-11-11	10	2018-11-11	14	2018-11-11	matin	1	Cricetomys_emini	Mammalia	Rodentia	Nesomyidae	LC	Class C	1.3	Autre	Jeune	Frais	Feménin	Consommation propre	domestic
10	2019-02-14		8	55		12	2019-02-14	6	2019-02-14	18		matin	1	Guttera_pucherani	Aves	Galliformes	Numididae		Class C
10	2019-02-06		8	55		7	2019-02-05	19	2019-02-06	2		nuit	1	Philantomba_monticola	Mammalia	Artiodactyla	Bovidae	LC	Class C	6.25	Fusil	Adulte		Feménin	Consommation propre	domestic
10	2019-02-25		8	55		11	2019-02-25	7	2019-02-25	18		matin	1	Philantomba_monticola	Mammalia	Artiodactyla	Bovidae	LC	Class C	6.25	Fusil	Adulte	Frais	Feménin	Vendu	selling	Bayam sellam
10	2019-02-25		8	55		11	2019-02-25	7	2019-02-25	18		matin	1	Philantomba_monticola	Mammalia	Artiodactyla	Bovidae	LC	Class C	6.25	Fusil	Jeune	Frais	Feménin	Consommation propre	domestic
10	2019-01-08		8	55		32	2019-01-07	9h	2019-01-08	17h		matin	1	Potamochoerus_porcus	Mammalia	Artiodactyla	Suidae	LC	Class B	70	Piège	Jeune	Frais	Masculin	Consommation propre et Vendu	both	Revendeur/euse
10	2019-02-12		8	55		12	2019-02-12	6	2019-02-12	18		matin	1	Tragelaphus_spekeii	Mammalia	Artiodactyla	Bovidae	LC	Class B	78	Fusil	Jeune	Frais	Masculin	Consommation propre et Vendu	both	Bayam sellam
10	2018-11-12		8	55		8	2018-11-12	7	2018-11-12	15			-1
10	2018-12-24		8	55		30	2018-12-23	8h	2018-12-24	14h			-1
10	2019-01-14		8	55		7	2019-01-14	6h	2019-01-14	13h	rien		-1
10	2019-01-17		8	55		9	2019-01-17	6h	2019-01-17	15h		rien	-1
10	2019-01-29		8	55		10	2019-01-29	6h	2019-01-29	16h		rien	-1
10	2019-02-04		8	55		48	2019-02-02	7	2019-02-04				-1
10	2019-02-26		8	55			2019-02-26	8	2019-02-26				-1
10	2018-12-13		8	55		9	2018-12-13	7h	2018-12-13	16h			-1
10	2018-12-14		8	55		9	2018-12-14	6h	2018-12-14	17h	2018-12-14		-1
10	2018-12-16		8	55			2018-12-16	6h					-1
10	2018-12-17		8	55									-1
10	2018-12-18		8	55									-1
10	2018-12-20		8	55			2018-12-20	6h					-1
10	2018-12-23		8	55			2018-12-23	8h					-1
10	2019-01-04		8	55		5	2019-01-04	8h	2019-01-04	13h			-1
10	2019-01-11		8	55		9	2019-01-11	6h	2019-01-11	17h	rien		-1
10	2019-01-30		8	55		10	2019-01-30	6h	2019-01-30	16h			-1
10	2019-02-02		8	55									-1
10	2019-02-03		8	55									-1
10	2019-02-05		8	55									-1
4	2018-03-13	3	1	56		5	2018-03-13	9h	2018-03-13	14h	2018-03-13	11h	1	Atherurus_africanus	Mammalia	Rodentia	Hystricidae	LC	Class C	1.93	Piège	Adulte	Frais		Consommation propre	domestic
4	2018-03-26	3	1	56		6	2018-03-26	8h	2018-03-26	14h	2018-03-26	10h	1	Atherurus_africanus	Mammalia	Rodentia	Hystricidae	LC	Class C	1.93	Piège	Adulte	Frais		Consommation propre	domestic
4	2018-03-31	3	1	56		5	2018-03-30	13h	2018-03-30	18h	2018-03-30	15h	1	Atherurus_africanus	Mammalia	Rodentia	Hystricidae	LC	Class C	1.93	Piège	Adulte	Frais		Vendu	selling	Voisin
4	2018-04-02	4	1	56		11	2018-04-02	7h	2018-04-02	18h	2018-04-02	13h	1	Atherurus_africanus	Mammalia	Rodentia	Hystricidae	LC	Class C	1.93	Piège	Adulte	Frais		À vendre	selling	Passant
4	2018-04-02	4	1	56		11	2018-04-02	7h	2018-04-02	18h			1	Atherurus_africanus	Mammalia	Rodentia	Hystricidae	LC	Class C	1.93	Piège	Adulte	Frais		Consommation propre	domestic
4	2018-05-10	5	1	56		11	2018-05-10	7h	2018-05-10	18h	2018-05-10	11h	1	Atherurus_africanus	Mammalia	Rodentia	Hystricidae	LC	Class C	1.93	Piège	Adulte	Frais		Vendu	selling	Passant
4	2018-05-24	5	1	56		11	2018-05-24	7h	2018-05-24	18h	2018-05-24		1	Atherurus_africanus	Mammalia	Rodentia	Hystricidae	LC	Class C	1.93	Piège	Adulte	Frais		Vendu	selling	Passant
4	2018-05-29	5	1	56		8	2018-05-29	7h	2018-05-29	15h	2018-05-29	matin	1	Atherurus_africanus	Mammalia	Rodentia	Hystricidae	LC	Class C	1.93	Piège	Adulte	Frais		Consommation propre	domestic
4	2018-06-01	6	1	56		11	2018-06-01	7h	2018-06-01	18h	2018-06-01	matin	1	Atherurus_africanus	Mammalia	Rodentia	Hystricidae	LC	Class C	1.93	Piège	Adulte	Frais		À vendre	selling	Voisin
4	2018-06-11	6	1	56		5	2018-06-11	11h	2018-06-11	16h	2018-06-11		1	Atherurus_africanus	Mammalia	Rodentia	Hystricidae	LC	Class C	1.93	Piège	Adulte	Frais		Vendu	selling	Voisin
4	2018-05-13	5	1	56		10	2018-05-13	6h	2018-05-13	16h			1	Bitis_gabonica	Reptilia	Squamata	Viperidae	LC	Class C	3.5	Autre	Adulte	Frais		À vendre	selling	Voisin
4	2018-05-21	5	1	56		6	2018-05-21	12h	2018-05-21	18h	2018-05-21	soir	1	Cephalophus_callipygus	Mammalia	Artiodactyla	Bovidae	LC	Class B	18.25	Piège	Adulte	Frais		À vendre	selling	Passant
4	2018-06-24	6	1	56		84	2018-06-21	6h	2018-06-24	18h			1	Cephalophus_callipygus	Mammalia	Artiodactyla	Bovidae	LC	Class B	18.25	Piège	Adulte	Frais		Vendu	selling	Voisin
4	2018-06-24	6	1	56		84	2018-06-21	6h	2018-06-24	18h			1	Cephalophus_callipygus	Mammalia	Artiodactyla	Bovidae	LC	Class B	18.25	Piège	Adulte	Frais		Vendu	selling	Voisin
4	2018-07-07	7	1	56		5	2018-07-07	11h	2018-07-07	16h	2018-07-07	matin	1	Cephalophus_callipygus	Mammalia	Artiodactyla	Bovidae	LC	Class B	18.25	Piège	Adulte	Boucané		À vendre	selling
4	2018-07-23	7	1	56		107	2018-07-19	7h	2018-07-23	18h			1	Cephalophus_callipygus	Mammalia	Artiodactyla	Bovidae	LC	Class B	18.25	Piège	Adulte	Frais
4	2018-07-02	7	1	56		147	2018-06-27	14h	2018-07-03	17h			1	Cephalophus_dorsalis	Mammalia	Artiodactyla	Bovidae	NT	Class B	20	Piège	Adulte	Boucané		Vendu	selling	Voisin
4	2018-07-02	7	2	56		147	2018-06-27	14h	2018-07-03	17h			1	Cephalophus_dorsalis	Mammalia	Artiodactyla	Bovidae	NT	Class B	20	Piège	Adulte	Boucané		Vendu	selling	Voisin
4	2018-07-23	7	1	56		107	2018-07-19	7h	2018-07-23	18h		matin	1	Cephalophus_dorsalis	Mammalia	Artiodactyla	Bovidae	NT	Class B	20	Piège	Adulte	Frais		Vendu	selling	Voisin
4	2018-03-21	3	1	56		6	2018-03-21	12h	2018-03-21	18h	2018-03-21	16h	1	Cricetomys_emini	Mammalia	Rodentia	Nesomyidae	LC	CLass C	1.3	Autre	Adulte	Frais		Consommation propre	domestic
4	2018-03-21	3	1	56		6	2018-03-21	12h	2018-03-21	18h			1	Cricetomys_emini	Mammalia	Rodentia	Nesomyidae	LC	CLass C	1.3	?
4	2018-03-21	3	1	56		6	2018-03-21	12h	2018-03-21	18h			1	Cricetomys_emini	Mammalia	Rodentia	Nesomyidae	LC	CLass C	1.3	?
4	2018-03-30	3	1	56		7	2018-03-30	11h	2018-03-30	18h	2018-03-30	14h30	1	Cricetomys_emini	Mammalia	Rodentia	Nesomyidae	LC	CLass C	1.3	Autre	Adulte	Frais		Consommation propre	domestic
4	2018-03-31	3	1	56		5	2018-03-30	13h	2018-03-30	18h			1	Cricetomys_emini	Mammalia	Rodentia	Nesomyidae	LC	CLass C	1.3	Autre	Jeune	Frais		Consommation propre	domestic
4	2018-04-10	4	1	56		5.5	2018-04-10	13h	2018-04-10	18h30	2018-04-10	16h	1	Cricetomys_emini	Mammalia	Rodentia	Nesomyidae	LC	CLass C	1.3	Autre	Adulte	Frais		Consommation propre	domestic
4	2018-04-17	4	1	56		4	2018-04-17	14h	2018-04-17	18h	2018-04-17	16h	1	Cricetomys_emini	Mammalia	Rodentia	Nesomyidae	LC	CLass C	1.3	Autre	Adulte	Frais		Consommation propre	domestic
4	2018-04-17	4	1	56		4	2018-04-17	14h	2018-04-17	18h			1	Cricetomys_emini	Mammalia	Rodentia	Nesomyidae	LC	CLass C	1.3	Autre	Adulte	Frais		Consommation propre	domestic
4	2018-04-21	4	1	56		7	2018-04-21	10h	2018-04-21	17h	2018-04-21	14h30	1	Cricetomys_emini	Mammalia	Rodentia	Nesomyidae	LC	CLass C	1.3	Autre		Frais		Consommation propre	domestic
4	2018-04-30	4	1	56		10	2018-04-30	8h	2018-04-30	18h			1	Cricetomys_emini	Mammalia	Rodentia	Nesomyidae	LC	CLass C	1.3	Autre	Adulte	Frais		Consommation propre	domestic
4	2018-05-27	5	1	56		9	2018-05-27	8h	2018-05-27	17h	2018-05-27		1	Cricetomys_emini	Mammalia	Rodentia	Nesomyidae	LC	CLass C	1.3	Piège	Adulte	Frais		Consommation propre	domestic
4	2018-06-01	6	1	56		11	2018-06-01	7h	2018-06-01	18h	2018-06-01	matin	1	Cricetomys_emini	Mammalia	Rodentia	Nesomyidae	LC	CLass C	1.3	Piège	Adulte	Frais		Consommation propre	domestic
4	2018-06-11	6	1	56		5	2018-06-11	11h	2018-06-11	16h	2018-06-11		1	Cricetomys_emini	Mammalia	Rodentia	Nesomyidae	LC	CLass C	1.3	Piège	Adulte	Frais		Consommation propre	domestic
4	2018-06-18	6	1	56		7	2018-06-18	9h	2018-06-18	16h	2018-06-18	matin	1	Cricetomys_emini	Mammalia	Rodentia	Nesomyidae	LC	CLass C	1.3	Autre	Adulte	Frais		Consommation propre	domestic
4	2018-05-29	5	1	56		8	2018-05-29	7h	2018-05-29	15h	2018-05-29	matin	1	Philantomba_monticola	Mammalia	Artiodactyla	Bovidae	LC	Class C	6.25	Piège	Adulte	Frais		Vendu	selling	Voisin
4	2018-06-18	6	1	56		7	2018-06-18	9h	2018-06-18	16h	2018-06-18	matin	1	Philantomba_monticola	Mammalia	Artiodactyla	Bovidae	LC	Class C	6.25	Piège	Adulte	Frais		Consommation propre	domestic
4	2018-06-24	6	1	56		84	2018-06-21	6h	2018-06-24	18h			1	Philantomba_monticola	Mammalia	Artiodactyla	Bovidae	LC	Class C	6.25	Piège	Adulte	Frais		Consommation propre	domestic
4	2018-07-02	7	3	56		147	2018-06-27	14h	2018-07-03	17h			1	Philantomba_monticola	Mammalia	Artiodactyla	Bovidae	LC	Class C	6.25	Piège	Adulte	Boucané		Consommation propre	domestic
4	2018-06-24	6	1	56		84	2018-06-21	6h	2018-06-24	18h			1	unspecified_mongoose	Mammalia	Carnivora	Herpestidae				Piège	Adulte	Frais		Consommation propre	domestic
4	2018-03-14	3	1	56		4	2018-03-14	13h	2018-03-14	17h			-1
4	2018-05-02	5	1	56		8	2018-05-02	10h	2018-05-02	18h			-1
4	2018-06-21	6	1	56			2018-06-21	6h					-1
4	2018-06-22	6	1	56			2018-06-21	6h					-1
4	2018-06-23	6	1	56			2018-06-21	6h					-1
4	2018-06-28	6	1	56			2018-06-27	14h					-1
4	2018-06-29	6	1	56			2018-06-27						-1
4	2018-06-30	6	1	56			2018-06-27						-1
4	2018-07-01	7	1	56			2018-06-27						-1
4	2018-06-08	6	1	56		11	2018-06-08	7h	2018-06-08	18h	2018-06-08		-1
4	2018-06-27	6	1	56									-1
4	2018-07-19	7	1	56									-1
4	2018-07-20	7	1	56									-1
4	2018-07-21	7	1	56									-1
4	2018-07-22	7	1	56									-1
5	2018-05-26	5	3	57		2	2018-05-26	10h	2018-05-26	12h	2018-05-26	Matin	1	Atherurus_africanus	Mammalia	Rodentia	Hystricidae	LC	Class C	1.93	Piège	Adulte	Frais		Consommation propre	domestic
5	2018-05-21	5	3	57		7	2018-05-21	6h31	2018-05-21	13h45	2018-05-21	Matin	1	Cephalophus_callipygus	Mammalia	Artiodactyla	Bovidae	LC	Class B	18.25	Piège	Adulte	Frais		Consommation propre et Vendu	both
5	2018-06-28	6	3	57		5	2018-06-28	8h	2018-06-28	13h	2018-06-28	matin	1	Cephalophus_dorsalis	Mammalia	Artiodactyla	Bovidae	NT	Class B	20	Piège	Jeune	Frais		consommation propre et à vendre	both	Passant
5	2018-05-24	5	3	57		4	2018-05-24	7h	2018-05-24	11h	2018-05-24	Matin	1	Cricetomys_emini	Mammalia	Rodentia	Nesomyidae	LC	CLass C	1.3	Piège	Adulte	Frais		Consommation propre	domestic
5	2018-06-05	6	3	57		4	2018-06-05	6h	2018-06-05	10h	2018-06-05	Matin	1	Cricetomys_emini	Mammalia	Rodentia	Nesomyidae	LC	CLass C	1.3	Piège	Adulte	Décomposé		Consommation propre	domestic
5	2018-06-06	6	3	57			2018-06-05		2018-06-05			matin	1	Cricetomys_emini	Mammalia	Rodentia	Nesomyidae	LC	CLass C	1.3	Piège	Jeune	Frais		Consommation propre	domestic
5	2018-06-07	6	3	57		4	2018-06-07	6h	2018-06-07	10h	2018-06-07	Matin	1	Cricetomys_emini	Mammalia	Rodentia	Nesomyidae	LC	CLass C	1.3	Piège	Jeune			Consommation propre	domestic
5	2018-07-07	7	3	57		4	2018-07-07	10h	2018-07-07	14h	2018-07-07	Soir	1	Cricetomys_emini	Mammalia	Rodentia	Nesomyidae	LC	CLass C	1.3	Piège	Jeune	Frais		consommation propre	domestic
5	2018-07-07	7	3	57		4	2018-07-07	10h	2018-07-07	14h	2018-07-07	Soir	1	Cricetomys_emini	Mammalia	Rodentia	Nesomyidae	LC	CLass C	1.3	Piège	Adulte	Frais		Consommation propre	domestic
5	2018-07-10	7	3	57		4	2018-07-10	6h	2018-07-10	10h	2018-07-10	matin	1	Cricetomys_emini	Mammalia	Rodentia	Nesomyidae	LC	CLass C	1.3	Piège	Jeune	Frais		consommation propre	domestic
5	2018-07-21	7	3	57		4	2018-07-21	6h	2018-07-21	10h			1	Cricetomys_emini	Mammalia	Rodentia	Nesomyidae	LC	CLass C	1.3	Piège	Jeune	Frais		Consommation propre	domestic
5	2018-07-21	7	3	57		4	2018-07-21	6h	2018-07-21	10h			1	Cricetomys_emini	Mammalia	Rodentia	Nesomyidae	LC	CLass C	1.3	Piège	Adulte	Frais		Consommation propre	domestic
5	2018-07-21	7	3	57		4	2018-07-21	6h	2018-07-21	10h			1	Cricetomys_emini	Mammalia	Rodentia	Nesomyidae	LC	CLass C	1.3	Piège	Adulte	Frais		Consommation propre	domestic
5	2018-05-29	5	3	57		4	2018-05-29	7h	2018-05-29	11h	2018-05-29	Matin	1	Kinixys_erosa	Reptilia	Testudines	Testudinidae	DD	Class B	1.5	Autre	Jeune	Vivant		Consommation propre	domestic
5	2018-04-17	4	3	57		6	2018-04-17	8h	2018-04-17	14h			1	Phataginus_spp.	Mammalia	Pholidota	Manidae	VU/EN	Class C	2.425	Piège	Adulte	Frais		Consommation propre	domestic
5	2018-06-19	6	3	57		6	2018-06-19	8h	2018-06-19	14h	2018-06-19	matin	1	Phataginus_spp.	Mammalia	Pholidota	Manidae	VU/EN	Class C	2.425	Piège	Jeune	Vivant		vendu	selling	Passant
5	2018-03-08	3	3	57		2	2018-03-08	10h	2018-03-08	12h	2018-03-08	11h	1	Philantomba_monticola	Mammalia	Artiodactyla	Bovidae	LC	Class C	6.25	Piège	adulte	Frais		Vendu	selling	Voisin
5	2018-04-11	4	3	57		7	2018-04-11	7h	2018-04-11	14h			1	Philantomba_monticola	Mammalia	Artiodactyla	Bovidae	LC	Class C	6.25	Piège	Jeune	Frais		Consommation propre	domestic
5	2018-05-23	5	3	57		4	2018-05-23	7h	2018-05-23	11h	2018-05-23	Matin	1	Philantomba_monticola	Mammalia	Artiodactyla	Bovidae	LC	Class C	6.25	Piège	Jeune	Frais		Consommation propre	domestic
5	2018-06-19	6	3	57		6	2018-06-19	8h	2018-06-19	14h	2018-06-19	matin	1	Philantomba_monticola	Mammalia	Artiodactyla	Bovidae	LC	Class C	6.25	Piège	Adulte	Frais		consommation propre	domestic
5	2018-03-28	3	3	57		6	2018-03-28	8h	2018-03-28	14h			-1
5	2018-04-05	4	3	57		6.5	2018-04-05	7h30	2018-04-05	14h			-1
5	2018-04-09	4	3	57		4	2018-04-09	7h30	2018-04-09	11h45			-1
5	2018-04-14	4	3	57		5	2018-04-14	8h	2018-04-14	13h			-1
5	2018-05-11	5	3	57		2	2018-05-11	8h00	2018-05-11	10h			-1
5	2018-05-16	5	3	57		7	2018-05-16	7h00	2018-05-16	14h			-1
5	2018-05-18	5	3	57		6	2018-05-18	7h	2018-05-18	13h			-1
5	2018-06-03	6	3	57		4	2018-06-03	6h	2018-06-03	10h			-1
5	2018-06-25	6	3	57		4	2018-06-25	7h	2018-06-25	11h			-1
5	2018-06-30	6	3	57		5	2018-06-30	6h	2018-06-30	11h			-1
5	2018-07-22	7	3	57		8	2018-07-22	6h	2018-07-22	14h			-1
5	2018-06-10	6	3	57		5	2018-06-10	7h	2018-06-10	11h			-1
5	2018-06-12	6	3	57		4	2018-06-12	6h	2018-06-12	10h			-1
5	2018-06-16	6	3	57		4	2018-06-16	6h	2018-06-16	10h			-1
5	2018-06-22	6	3	57		5	2018-06-22	9h	2018-06-22	14h		Rien	-1
5	2018-04-23	4	8	58		2	2018-04-23	6h03	2018-04-23	8h			-1
9	2018-03-11	3	7	59		10	2018-03-11	5h	2018-03-11	15h	2018-03-11	11h	1	Mandrillus_sphinx	Mammalia	Primates	Cercopithecidae	VU	Class A	18.25	Fusil	Adulte	Frais		Vendu	selling	Revendeur/euse
9	2018-03-11	3	7	59		10	2018-03-11	5h	2018-03-11	15h	2018-03-11	11h	1	Mandrillus_sphinx	Mammalia	Primates	Cercopithecidae	VU	Class A	18.25	Fusil	Jeune	Frais		Consommation propre	domestic
9	2018-03-11	3	7	59		10	2018-03-11	5h	2018-03-11	15h	2018-03-11	11h	1	Mandrillus_sphinx	Mammalia	Primates	Cercopithecidae	VU	Class A	18.25	Fusil	Adulte	Frais		Vendu	selling	Voisin
9	2018-03-11	3	7	59		10	2018-03-11	5h	2018-03-11	15h	2018-03-11	11h	1	Mandrillus_sphinx	Mammalia	Primates	Cercopithecidae	VU	Class A	18.25	Fusil	Jeune	Frais		Consommation propre	domestic
9	2018-03-14	3	7	59		10	2018-03-14	5h	2018-03-14	15h	2018-03-14	Matin	1	Philantomba_monticola	Mammalia	Artiodactyla	Bovidae	LC	Class C	6.25	Fusil	Adulte	Frais		Consommation propre et Vendu	both	Voisin
6	2018-04-22	4	15	60		11	2018-04-22	7h	2018-04-22	18h	2018-04-22	10h15	1	Cephalophus_spp.	Mammalia	Artiodactyla	Bovidae	various	Class B	16.21	Fusil	Jeune	Frais		Consommation propre et Vendu	both	Voisin
6	2018-06-23	6	15	60		6	2018-06-23	9h	2018-06-23	15h	2018-06-23	matin	1	Cercopithecus_cephus	Mammalia	Primates	Cercopithecidae	LC	Class C	3.485	Fusil	Adulte	Frais		Consommation propre	domestic
6	2018-05-17	5	15	60		8.5	2018-05-17	8h	2018-05-17	16h30	2018-05-17	matin	1	Cercopithecus_nictitans	Mammalia	Primates	Cercopithecidae	NT	Class C	5.41	Fusil	Adulte	Frais		consommation propre	domestic
6	2018-06-04	6	15	60		8	2018-06-04	7h	2018-06-04	15h	2018-05-04	matin	1	Civettictis_civetta	Mammalia	Carnivora	Herpestidae	LC	Class B	12	Piège	Adulte	frais		consommation propre et vendu	both	Voisin
6	2018-04-26	4	15	60		13	2018-04-26	6h	2018-04-26	19h	2018-04-26	10h	1	Philantomba_monticola	Mammalia	Artiodactyla	Bovidae	LC	Class C	6.25	Piège	Jeune	Vivant		Vendu	selling	Passant
6	2018-05-10	5	15	60		10.5	2018-05-10	7h30	2018-05-10	16h	2018-05-10	matin	1	Philantomba_monticola	Mammalia	Artiodactyla	Bovidae	LC	Class C	6.25	Piège	Jeune	Vivant		consommation propre	domestic
6	2018-04-23	4	15	60		11	2018-04-23	8h	2018-04-23	19h	2018-04-23	13h05	1	Potamochoerus_porcus	Mammalia	Artiodactyla	Suidae	LC	Class B	70	Piège	Jeune	Vivant		Consommation propre et Vendu	both	Bantou
6	2018-04-24	4	15	60		10	2018-04-24	8h	2018-04-24	18h	2018-04-24	10h45	1	Thryonomys_swinderianus	Mammalia	Rodentia	Thryonomyidae	LC	Class C	4.06	Piège	Jeune	Frais		Consommation propre	domestic
6	2018-03-13	3	15	60		3.5	2018-03-17	14h	2018-03-17	17h30			-1
2	2018-11-12		4	61		8	2018-11-12	7	2018-11-12	15	2018-11-12	matin	1	Atherurus_africanus	Mammalia	Rodentia	Hystricidae	LC	Class C	1.93	Piège	Jeune	Décomposé	Masculin
2	2018-11-12		4	61		8	2018-11-12	7	2018-11-12	15	2018-11-12	matin	1	Atherurus_africanus	Mammalia	Rodentia	Hystricidae	LC	Class C	1.93	Piège	Adulte	Frais	Masculin	Vendu	selling	Passant
2	2019-02-22		4	61		6	2019-02-22	8	2019-02-22	14		jour	1	Atherurus_africanus	Mammalia	Rodentia	Hystricidae	LC	Class C	1.93	Piège	Jeune	Décomposé	Masculin	Consommation propre	domestic
2	2019-02-22		4	61		6	2019-02-22	8	2019-02-22	14		jour	1	Atherurus_africanus	Mammalia	Rodentia	Hystricidae	LC	Class C	1.93	Piège	Adulte	Frais	Masculin	Vendu	selling
2	2018-11-12		4	61		8	2018-11-12	7	2018-11-12	15	2018-11-12	matin	1	Cephalophus_callipygus	Mammalia	Artiodactyla	Bovidae	LC	Class B	18.25	Piège	Adulte	Frais	Feménin	Consommation propre et Vendu	both	Voisin
2	2018-12-22		4	61			2018-12-22		2018-12-22		2018-12-22	matin	1	Cephalophus_callipygus	Mammalia	Artiodactyla	Bovidae	LC	Class B	18.25	Piège	Adulte	Décomposé	Feménin	Consommation propre	domestic
2	2018-10-19		4	61		13	2018-10-19	6	2018-10-19	19	2018-10-19	matin	1	Cephalophus_dorsalis	Mammalia	Artiodactyla	Bovidae	NT	Class B	20	Piège	Adulte	Frais		Vendu	selling	Passant
2	2018-10-22		4	61		9	2018-10-22	6	2018-10-22	15	2018-10-22	matin	1	Cephalophus_dorsalis	Mammalia	Artiodactyla	Bovidae	NT	Class B	20	Piège	Adulte	Frais		Consommation propre et Vendu	both	Voisin
2	2018-11-12		4	61		8	2018-11-12	7	2018-11-12	15	2018-11-12	matin	1	Cephalophus_dorsalis	Mammalia	Artiodactyla	Bovidae	NT	Class B	20	Piège	Adulte	Frais	Masculin	Vendu	selling	Voisin
2	2019-01-10		4	61		7	2019-01-10	6h	2019-01-10	13h	2019-01-10	matin	1	Cephalophus_dorsalis	Mammalia	Artiodactyla	Bovidae	NT	Class B	20	Piège	Jeune	Frais	Masculin	Consommation propre et Vendu	both	Voisin
2	2019-01-27		4	61		7	2019-01-27	6h	2019-01-27	13h	2019-01-27	matin	1	Cercopithecus_cephus	Mammalia	Primates	Cercopithecidae	LC	Class C	3.485	Piège	Adulte	Frais	Feménin	Consommation propre	domestic
2	2019-02-02		4	61		10	2019-02-02	6	2019-02-02	16		matin	1	Cercopithecus_cephus	Mammalia	Primates	Cercopithecidae	LC	Class C	3.485	Fusil	Jeune	Frais	Feménin	Consommation propre	domestic
2	2018-10-19		4	61		13	2018-10-19	6	2018-10-19	19	2018-10-19	matin	1	Cercopithecus_nictitans	Mammalia	Primates	Cercopithecidae	NT	Class C	5.41	Fusil	Adulte	Frais		Vendu	selling
2	2018-12-09		4	61		7	2018-12-09	7	2018-12-09	14	2018-12-09	jour	1	Cercopithecus_nictitans	Mammalia	Primates	Cercopithecidae	NT	Class C	5.41	Piège	Jeune	Décomposé	Feménin	Consommation propre	domestic
2	2019-01-01		4	61		3	2019-01-01	6h	2019-01-01	9h	2019-01-01	matin	1	Cercopithecus_nictitans	Mammalia	Primates	Cercopithecidae	NT	Class C	5.41	Fusil	Adulte	Frais	Feménin	Consommation propre	domestic
2	2019-01-18		4	61		5	2019-01-18	7h	2019-01-18	12h	2019-01-18	matin	1	Cercopithecus_nictitans	Mammalia	Primates	Cercopithecidae	NT	Class C	5.41	Fusil	Adulte	Frais	Masculin	Vendu	selling
2	2019-01-18		4	61		5	2019-01-18	7h	2019-01-18	12h	2019-01-18	matin	1	Cercopithecus_nictitans	Mammalia	Primates	Cercopithecidae	NT	Class C	5.41	Fusil	Jeune	Frais	Masculin	Consommation propre	domestic
2	2019-02-02		4	61		10	2019-02-02	6	2019-02-02	16		jour	1	Cercopithecus_nictitans	Mammalia	Primates	Cercopithecidae	NT	Class C	5.41	Fusil	Jeune	Frais	Masculin	Vendu	selling
2	2018-10-19		4	61		13	2018-10-19	6	2018-10-19	19	2018-10-19	matin	1	Cercopithecus_pogonias	Mammalia	Primates	Cercopithecidae	VU	Class C	3.25	Fusil	Jeune	Frais	Feménin	Consommation propre	domestic
2	2018-12-29		4	61		53	2018-12-27	7h	2018-12-29	12h		matin	1	Colobus_guereza	Mammalia	Primates	Cercopithecidae	LC	Class A	10.2	Fusil	Adulte	Boucané		Consommation propre	domestic
2	2018-11-18		4	61		5	2018-11-18	8	2018-11-18	13	2018-11-18	matin	1	Genetta_servalina	Mammalia	Carnivora	Herpestidae	LC	Class B	1.055	Piège	Adulte	Frais	Feménin	Consommation propre	domestic
2	2019-02-26		4	61		8	2019-02-26	7	2019-02-26	15		matin	1	Herpestes_naso	Mammalia	Carnivora	Herpestidae	LC	Class C	2.9	Piège	Jeune	Décomposé	Masculin	Consommation propre	domestic
2	2019-02-02		4	61		10	2019-02-02	6	2019-02-02	16		jour	1	Kinixys_erosa	Reptilia	Testudines	Testudinidae	DD	Class B	1.5	Autre	Adulte	Vivant	Masculin	Consommation propre	domestic
2	2018-10-22		4	61		9	2018-10-22	6	2018-10-22	15	2018-10-22	matin	1	Mandrillus_sphinx	Mammalia	Primates	Cercopithecidae	VU	Class A	18.25	Piège		Frais		Vendu	selling	Passant
2	2018-12-29		4	61		53	2018-12-27	7h	2018-12-29	12h		jour	1	Mandrillus_sphinx	Mammalia	Primates	Cercopithecidae	VU	Class A	18.25	Fusil	Adulte	Boucané		Consommation propre et Vendu	both
2	2018-12-22		4	61			2018-12-22		2018-12-22		2018-12-22	jour	1	Nandinia_binotata	Mammalia	Carnivora	Nandiniidae	LC	Class C	2	Piège	Adulte	Frais	Masculin	Vendu	selling	Voisin
2	2018-12-17		4	61		7	2018-12-17	8h	2018-12-17	15h	2018-12-17		1	Phataginus_spp.	Mammalia	Pholidota	Manidae	VU/EN	Class C	2.425	Piège	Adulte	Décomposé	Feménin	Consommation propre	domestic
2	2018-10-17		4	61		4	2018-10-17	7	2018-10-17	11	2018-10-17	matin	1	Philantomba_monticola	Mammalia	Artiodactyla	Bovidae	LC	Class C	6.25	Autre			Feménin	Consommation propre	domestic
2	2018-10-19		4	61		13	2018-10-19	6	2018-10-19	19	2018-10-19	matin	1	Philantomba_monticola	Mammalia	Artiodactyla	Bovidae	LC	Class C	6.25	Piège	Adulte	Frais		Consommation propre	domestic
2	2018-10-19		4	61		13	2018-10-19	6	2018-10-19	19	2018-10-19	matin	1	Philantomba_monticola	Mammalia	Artiodactyla	Bovidae	LC	Class C	6.25	Piège	Adulte	Frais		Vendu	selling
2	2018-11-05		4	61		6	2018-11-05	7	2018-11-05	13	2018-11-05	matin	1	Philantomba_monticola	Mammalia	Artiodactyla	Bovidae	LC	Class C	6.25	Piège	Jeune	Décomposé	Feménin	Consommation propre	domestic
2	2018-11-05		4	61		6	2018-11-05	7	2018-11-05	13	2018-11-05	matin	1	Philantomba_monticola	Mammalia	Artiodactyla	Bovidae	LC	Class C	6.25	Piège	Adulte	Frais	Feménin	Vendu	selling	Voisin
2	2018-11-24		4	61		5	2018-11-24	8	2018-11-24	13	2018-11-24	matin	1	Philantomba_monticola	Mammalia	Artiodactyla	Bovidae	LC	Class C	6.25	Piège	Jeune	Décomposé	Masculin	Consommation propre	domestic
2	2018-12-09		4	61		7	2018-12-09	7	2018-12-09	14	2018-12-09	jour	1	Philantomba_monticola	Mammalia	Artiodactyla	Bovidae	LC	Class C	6.25	Piège	Adulte	Frais	Feménin	Vendu	selling	Voisin
2	2018-12-29		4	61		53	2018-12-27	7h	2018-12-29	12h		matin	1	Philantomba_monticola	Mammalia	Artiodactyla	Bovidae	LC	Class C	6.25	Piège	Jeune		Feménin	Vendu	selling	Voisin
2	2019-01-04		4	61		9	2019-01-04	7h	2019-01-04	16h	2019-01-04	matin	1	Philantomba_monticola	Mammalia	Artiodactyla	Bovidae	LC	Class C	6.25	Piège	Jeune	Décomposé	Masculin	Consommation propre	domestic
2	2019-01-04		4	61		9	2019-01-04	7h	2019-01-04	16h	2019-01-04	matin	1	Philantomba_monticola	Mammalia	Artiodactyla	Bovidae	LC	Class C	6.25	Piège	Adulte	Frais	Masculin	Vendu	selling	Voisin
2	2019-01-27		4	61		7	2019-01-27	6h	2019-01-27	13h	2019-01-27	matin	1	Philantomba_monticola	Mammalia	Artiodactyla	Bovidae	LC	Class C	6.25	Piège	Jeune	Frais	Feménin	Vendu	selling
2	2019-02-09		4	61		8	2019-02-09	7	2019-02-09	15		jour	1	Philantomba_monticola	Mammalia	Artiodactyla	Bovidae	LC	Class C	6.25	Piège	Adulte	Décomposé	Feménin	Consommation propre	domestic
2	2019-02-14		4	61		6	2019-02-14	7	2019-02-14	13			1	Philantomba_monticola	Mammalia	Artiodactyla	Bovidae	LC	Class C	6.25	Piège	Adulte	Frais	Masculin	Consommation propre	domestic
2	2019-02-26		4	61		8	2019-02-26	7	2019-02-26	15		jour	1	Philantomba_monticola	Mammalia	Artiodactyla	Bovidae	LC	Class C	6.25	Piège	Adulte	Frais	Feménin	Consommation propre	domestic
2	2018-11-12		4	61		8	2018-11-12	7	2018-11-12	15	2018-11-12	matin	1	unspecified_squirrel	Mammalia	Rodentia	Sciuridae		Class C		Piège	Jeune	Décomposé	Feménin	Consommation propre	domestic
2	2018-10-22		4	61		9	2018-10-22	6	2018-10-22	15	2018-10-22	matin	1	Varanus_ornatus	Reptilia	Squamata	Varanidae	VU	Class B		Piège		Frais		Vendu	selling	Voisin
2	2019-01-27		4	61		7	2019-01-27	6h	2019-01-27	13h	2019-01-27	matin	1	Varanus_ornatus	Reptilia	Squamata	Varanidae	VU	Class B		Piège	Adulte	Frais	Feménin	Consommation propre	domestic
2	2019-02-26		4	61		8	2019-02-26	7	2019-02-26	15		jour	1	Varanus_ornatus	Reptilia	Squamata	Varanidae	VU	Class B		Piège	Adulte	Frais	Masculin	Consommation propre et Vendu	both
2	2018-11-26		4	61		5	2018-11-26	8	2018-11-26	13			-1
2	2018-12-01		4	61			2018-12-01		2018-12-01				-1
2	2018-12-06		4	61		7	2018-12-06	7	2018-12-06	14			-1
2	2018-10-25		4	61		5	2018-10-24	7	2018-10-24	12			-1
2	2018-10-26		4	61		5	2018-10-26	7	2018-10-26	12			-1
2	2018-10-27		4	61		5	2018-10-27	11	2018-10-27	16			-1
2	2018-10-29		4	61		5	2018-10-29	6	2018-10-29	11			-1
2	2018-11-08		4	61		6	2018-11-08	7	2018-11-08	13			-1								Piège
2	2018-11-29		4	61		6	2018-11-29	6	2018-11-29	12		rien	-1
2	2018-12-04		4	61			2018-12-04		2018-12-04		2018-12-04		-1
2	2018-12-23		4	61									-1
2	2018-12-27		4	61			2018-12-27	7h					-1
2	2018-12-28		4	61			2019-12-27	7h					-1
4	2018-03-28	3	5	62		7	2018-03-24	7h	2018-03-28	14h			1	Atherurus_africanus	Mammalia	Rodentia	Hystricidae	LC	Class C	1.93	Piège	Adulte	Frais		Consommation propre	domestic
4	2018-03-28	3	5	62		7	2018-03-24	7h	2018-03-28	14h			1	Cephalophus_spp.	Mammalia	Artiodactyla	Bovidae	various	Class B	16.21	Piège	Adulte	Frais		Vendu	selling	Voisin
4	2018-04-03	4	5	62		57	2018-04-01	8h	2018-04-03	17h			1	Cephalophus_spp.	Mammalia	Artiodactyla	Bovidae	various	Class B	16.21	Piège	Adulte	Boucané		À vendre	selling	Voisin
4	2018-04-09	4	5	62		108	2018-04-05	6h	2018-04-09	18h			1	Cephalophus_spp.	Mammalia	Artiodactyla	Bovidae	various	Class B	16.21	Piège	Adulte	Boucané		À vendre	selling	Passant
4	2018-03-20	3	5	62		77	2018-03-17	6h	2018-03-20	11h			1	Philantomba_monticola	Mammalia	Artiodactyla	Bovidae	LC	Class C	6.25	Piège		Boucané		Consommation propre	domestic
4	2018-04-03	4	5	62		57	2018-04-01	8h	2018-04-03	17h			1	Philantomba_monticola	Mammalia	Artiodactyla	Bovidae	LC	Class C	6.25	Piège	Adulte	Boucané		À vendre	selling	Voisin
4	2018-04-03	4	5	62		57	2018-04-01	8h	2018-04-03	17h			1	Philantomba_monticola	Mammalia	Artiodactyla	Bovidae	LC	Class C	6.25	Piège	Adulte	Boucané		Consommation propre	domestic
4	2018-04-09	4	5	62		108	2018-04-05	6h	2018-04-09	18h			1	Philantomba_monticola	Mammalia	Artiodactyla	Bovidae	LC	Class C	6.25	Piège	Adulte	Boucané		À vendre	selling	Voisin
4	2018-04-09	4	5	62		108	2018-04-05	6h	2018-04-09	18h			1	Philantomba_monticola	Mammalia	Artiodactyla	Bovidae	LC	Class C	6.25	Piège	Adulte	Boucané		Consommation propre	domestic
4	2018-03-17	3	6	62									-1
4	2018-03-24	3	5	62									-1
4	2018-03-25	3	5	62									-1
4	2018-03-26	3	5	62									-1
4	2018-04-01	4	5	62									-1
4	2018-04-02	4	5	62									-1
4	2018-04-05	4	5	62									-1
4	2018-04-06	4	5	62									-1
4	2018-04-07	4	5	62									-1
4	2018-04-08	4	5	62									-1
1	2018-10-18		4	63		11	2018-10-18	6h45	2018-10-18	17h30	2018-10-18	soir	1	Atherurus_africanus	Mammalia	Rodentia	Hystricidae	LC	Class C	1.93	Piège	Adulte	Décomposé		Consommation propre	domestic
1	2019-02-08		4	63		9	2019-02-08	8	2019-02-08	17		matin	1	Bitis_gabonica	Reptilia	Squamata	Viperidae	LC	Class C	3.5	Autre	Jeune	Frais		Vendu	selling	Voisin
1	2018-11-24		4	63		7.5	2018-11-24	6h30	2018-11-24	14	2018-11-24	matin	1	Cephalophus_dorsalis	Mammalia	Artiodactyla	Bovidae	NT	Class B	20	Piège	Jeune	Frais	Feménin	Consommation propre	domestic
1	2018-10-18		4	63		11	2018-10-18	6h45	2018-10-18	17h30	2018-10-18	soir	1	Philantomba_monticola	Mammalia	Artiodactyla	Bovidae	LC	Class C	6.25	Piège	Adulte	Décomposé		Consommation propre	domestic
1	2018-10-18		4	63		11	2018-10-18	6h45	2018-10-18	17h30	2018-10-18	soir	1	Philantomba_monticola	Mammalia	Artiodactyla	Bovidae	LC	Class C	6.25	Piège	Adulte	Décomposé		Consommation propre	domestic
1	2018-10-30		4	63		10	2018-10-30	7h30	2018-10-30	17h30			-1
1	2018-11-06		4	63		5.5	2018-11-06	8h30	2018-11-06	14			-1								Piège
1	2018-12-08		4	63		78.5	2018-12-05	7h30	2018-12-08	14			-1
1	2019-01-11		4	63		2.5	2019-01-11	6h30	2019-01-11	9h			-1
1	2019-01-25		4	63		1.5	2019-01-25	6h30	2019-01-25	8h		rien	-1
1	2018-11-29		4	63		10	2018-12-29	8	2018-12-29	18			-1
1	2018-12-06		4	63									-1
1	2018-12-07		4	63									-1
9	2018-03-18	3	2	64			2018-03-18	matin	2018-03-18	matin	2018-03-18	matin	1	Atherurus_africanus	Mammalia	Rodentia	Hystricidae	LC	Class C	1.93	Piège	Jeune	Frais		Consommation propre	domestic
9	2018-03-30	3	2	64			2018-03-30	8h	2018-03-30	midi	2018-03-30	Matin	1	Cricetomys_emini	Mammalia	Rodentia	Nesomyidae	LC	CLass C	1.3	Autre	Jeune	Frais		Consommation propre	domestic
3	2018-10-25		12	65			2018-10-25	6h30	2018-10-25	6h30	2018-10-25	6h30	1	Cephalophus_callipygus	Mammalia	Artiodactyla	Bovidae	LC	Class B	18.25		Adulte		Masculin	Consommation propre et Vendu	both
3	2018-10-30		12	65		6.5	2018-10-30	7	2018-10-30	13h45	2018-10-30	matin	1	Cephalophus_callipygus	Mammalia	Artiodactyla	Bovidae	LC	Class B	18.25	Piège	Jeune	Frais	Masculin	Consommation propre et à vendre	both
3	2018-11-11		12	65		8	2018-11-11	6h30	2018-11-11	14h30	2018-11-11		1	Cephalophus_callipygus	Mammalia	Artiodactyla	Bovidae	LC	Class B	18.25	Piège	Adulte	Frais	Feménin	Vendu	selling
3	2018-11-17		12	65		6	2018-11-17	10h30	2018-11-17	16h30	2018-11-17		1	Cephalophus_callipygus	Mammalia	Artiodactyla	Bovidae	LC	Class B	18.25	Piège	Jeune	Frais	Feménin	Consommation propre et Vendu	both	Voisin
3	2018-11-25		12	65		7.5	2018-11-25	7	2018-11-25	14h30	2018-11-25		1	Cephalophus_callipygus	Mammalia	Artiodactyla	Bovidae	LC	Class B	18.25	Piège	Adulte	Boucané		Consommation propre et Vendu	both	Passant
3	2018-12-07		12	65		33.5	2018-12-06	6	2018-12-07	15h30	2018-12-07		1	Cephalophus_callipygus	Mammalia	Artiodactyla	Bovidae	LC	Class B	18.25	Piège	Adulte	Frais	Masculin	Consommation propre et Vendu	both	Passant
3	2018-12-11		12	65		9.5	2018-12-11	7	2018-12-11	16h30	2018-12-11	jour	1	Cephalophus_callipygus	Mammalia	Artiodactyla	Bovidae	LC	Class B	18.25	Piège	Jeune	Frais	Masculin	Consommation propre et Vendu	both	Voisin
3	2018-12-15		12	65		9	2018-12-15	7h30	2018-12-15	16h30	2018-12-15		1	Cephalophus_callipygus	Mammalia	Artiodactyla	Bovidae	LC	Class B	18.25	Piège	Adulte	Frais	Masculin	Consommation propre et Vendu	both
3	2018-11-02		12	65		7	2018-11-02	8	2018-11-02	15	2018-11-02	jour	1	Cephalophus_dorsalis	Mammalia	Artiodactyla	Bovidae	NT	Class B	20	Piège	Adulte	Frais	Feménin	À vendre	selling
3	2018-11-04		12	65		8	2018-11-04	8	2018-11-04	16	2018-11-04	soir	1	Cephalophus_dorsalis	Mammalia	Artiodactyla	Bovidae	NT	Class B	20	Piège	Adulte	Frais	Feménin	À vendre	selling
3	2018-11-06		12	65		6.5	2018-11-06	8h30	2018-11-06	15	2018-11-06	jour	1	Cephalophus_dorsalis	Mammalia	Artiodactyla	Bovidae	NT	Class B	20	Piège	Adulte		Feménin	Consommation propre et à vendre	both
3	2018-11-08		12	65		9	2018-11-08	6h10	2018-11-08	15	2018-11-08		1	Cephalophus_dorsalis	Mammalia	Artiodactyla	Bovidae	NT	Class B	20	Piège	Adulte	Frais	Masculin	Consommation propre et Vendu	both
3	2018-11-11		12	65		8	2018-11-11	6h30	2018-11-11	14h30	2018-11-11		1	Cephalophus_dorsalis	Mammalia	Artiodactyla	Bovidae	NT	Class B	20	Piège	Adulte	Frais	Masculin	Consommation propre et Vendu	both
3	2018-11-25		12	65		7.5	2018-11-25	7	2018-11-25	14h30	2018-11-25		1	Cephalophus_dorsalis	Mammalia	Artiodactyla	Bovidae	NT	Class B	20	Piège	Adulte	Boucané	Masculin	Consommation propre et Vendu	both	Passant
3	2018-11-25		12	65		7.5	2018-11-25	7	2018-11-25	14h30	2018-11-25		1	Cephalophus_dorsalis	Mammalia	Artiodactyla	Bovidae	NT	Class B	20	Piège	Adulte	Boucané	Masculin	Consommation propre et Vendu	both	Passant
3	2018-12-01		12	65		6.5	2018-12-01	7h30	2018-12-01	14	2018-12-01	jour	1	Cephalophus_dorsalis	Mammalia	Artiodactyla	Bovidae	NT	Class B	20	Piège	Jeune	Frais	Feménin	Consommation propre et Vendu	both	Voisin
3	2018-12-07		12	65		33.5	2018-12-06	6	2018-12-07	15h30			1	Cephalophus_dorsalis	Mammalia	Artiodactyla	Bovidae	NT	Class B	20	Piège	Adulte	Boucané	Feménin	Consommation propre et Vendu	both	Voisin
3	2018-12-15		12	65		9	2018-12-15	7h30	2018-12-15	16h30	2018-12-15		1	Cephalophus_dorsalis	Mammalia	Artiodactyla	Bovidae	NT	Class B	20	Piège	Jeune	Frais	Feménin	Consommation propre et Vendu	both
3	2018-10-27		12	65		8	2018-10-27	6h40	2018-10-27	14h30	2018-10-27	jour	1	Cephalophus_nigrifrons	Mammalia	Artiodactyla	Bovidae	LC	Class C	13.9	Piège	Adulte	Frais	Feménin	Consommation propre et Vendu	both
3	2018-11-10		12	65		7.5	2018-11-10	8h30	2018-11-10	16	2018-11-10		1	Cephalophus_nigrifrons	Mammalia	Artiodactyla	Bovidae	LC	Class C	13.9	Piège	Adulte	Frais	Masculin	Consommation propre et Vendu	both	Passant
3	2018-10-25		12	65			2018-10-25	6h30	2018-10-25	6h30	2018-10-25	6h30	1	Cercopithecus_cephus	Mammalia	Primates	Cercopithecidae	LC	Class C	3.485		Adulte		Feménin	À vendre	selling
3	2018-11-05		12	65		7.5	2018-11-05	8h30	2018-11-05	16	2018-11-05	jour	1	Philantomba_monticola	Mammalia	Artiodactyla	Bovidae	LC	Class C	6.25	Piège	Adulte	Frais	Masculin	À vendre	selling
3	2018-11-11		12	65		8	2018-11-11	6h30	2018-11-11	14h30	2018-11-11		1	Philantomba_monticola	Mammalia	Artiodactyla	Bovidae	LC	Class C	6.25	Piège	Jeune	Frais	Feménin	À vendre	selling
3	2018-11-30		12	65		31	2018-11-29	8	2018-11-30	15	2018-11-30	jour	1	Philantomba_monticola	Mammalia	Artiodactyla	Bovidae	LC	Class C	6.25	Piège	Adulte	Boucané	Feménin	Consommation propre	domestic
3	2018-12-07		12	65		33.5	2018-12-06	6	2018-12-07	15h30			1	Philantomba_monticola	Mammalia	Artiodactyla	Bovidae	LC	Class C	6.25	Piège	Adulte	Boucané	Feménin	Vendu	selling	Passant
3	2018-12-15		12	65		9	2018-12-15	7h30	2018-12-15	16h30	2018-12-15		1	Philantomba_monticola	Mammalia	Artiodactyla	Bovidae	LC	Class C	6.25	Piège	Adulte	Frais	Masculin	Vendu	selling
3	2018-10-26		11	65		7	2018-10-26	8h30	2018-10-26	15h30	2018-10-26	matin	1	Potamochoerus_porcus	Mammalia	Artiodactyla	Suidae	LC	Class B	70	Piège	Jeune	Frais	Feménin	Consommation propre et Vendu	both
3	2018-11-06		12	65		6.5	2018-11-06	8h30	2018-11-06	15	2018-11-06	jour	1	Varanus_ornatus	Reptilia	Squamata	Varanidae	VU	Class B		Piège	Adulte		Feménin	À vendre	selling
3	2018-10-28		12	65			2018-10-28	9	2018-10-28				-1
3	2018-11-29		12	65									-1
3	2018-12-06		12	65									-1
9	2018-03-11	3	4	66		5	2018-03-11	7h	2018-03-11	12h	2018-03-11	10h	1	Varanus_ornatus	Reptilia	Squamata	Varanidae	VU	Class B	5	Piège	Adulte	Frais		Vendu	selling	Voisin
1	2018-10-17		1	68		8	2018-10-17	6h30	2018-10-17	14h20	2018-10-17	matin	1	Atherurus_africanus	Mammalia	Rodentia	Hystricidae	LC	Class C	1.93	Piège	Adulte	Décomposé		Consommation propre	domestic
1	2018-11-16		1	68			2018-11-16		2018-11-16		2018-11-16	matin	1	Atherurus_africanus	Mammalia	Rodentia	Hystricidae	LC	Class C	1.93	Piège	Adulte	Décomposé	Feménin	Consommation propre	domestic
1	2018-10-22		1	68		8.5	2018-10-22	9	2018-10-22	17h30	2018-10-22	matin	1	Cephalophus_dorsalis	Mammalia	Artiodactyla	Bovidae	NT	Class B	20	Piège	Adulte	Décomposé		Consommation propre et à vendre	both
1	2018-10-22		1	68		8.5	2018-10-22	9	2018-10-22	17h30	2018-10-22	matin	1	Cercopithecus_pogonias	Mammalia	Primates	Cercopithecidae	VU	Class C	3.25	Autre	Adulte	Frais		À vendre	selling
1	2018-10-22		1	68		8.5	2018-10-22	9	2018-10-22	17h30	2018-10-22	matin	1	Cercopithecus_pogonias	Mammalia	Primates	Cercopithecidae	VU	Class C	3.25	Autre	Jeune	Frais		À vendre	selling
1	2018-11-08		1	68		7.5	2018-11-08	7h15	2018-11-08	14h30	2018-11-08	matin	1	Cricetomys_emini	Mammalia	Rodentia	Nesomyidae	LC	Class C	1.3	Piège	Jeune	Frais	Feménin	Consommation propre	domestic
1	2018-11-10		1	68		7	2018-11-10	7h30	2018-11-10	14h30	2018-11-10	matin	1	Cricetomys_emini	Mammalia	Rodentia	Nesomyidae	LC	Class C	1.3	Piège	Adulte	Frais	Feménin	Consommation propre	domestic
1	2018-11-10		1	68		7	2018-11-10	7h30	2018-11-10	14h30	2018-11-10	matin	1	Herpestes_naso	Mammalia	Carnivora	Herpestidae	LC	Class C	2.9	Piège	Jeune	Frais	Feménin	Consommation propre	domestic
1	2018-10-17		1	68		8	2018-10-17	6h30	2018-10-17	14h20	2018-10-17	matin	1	Kinixys_erosa	Reptilia	Testudines	Testudinidae	DD	Class B	1.5	Piège	Adulte	Vivant		Consommation propre	domestic
1	2018-10-17		1	68		8	2018-10-17	6h30	2018-10-17	14h20	2018-10-17	matin	1	Kinixys_erosa	Reptilia	Testudines	Testudinidae	DD	Class B	1.5	Autre	Adulte	Vivant		Consommation propre	domestic
1	2018-10-27		1	68		8	2018-10-27	7	2018-10-27	15	2018-10-27	matin	1	Kinixys_erosa	Reptilia	Testudines	Testudinidae	DD	Class B	1.5	Autre	Adulte	Frais	Masculin	Consommation propre	domestic
1	2018-11-13		1	68		2	2018-11-13	6	2018-11-13	8	2018-11-13	matin	1	Phataginus_spp.	Mammalia	Pholidota	Manidae	VU/EN	Class C	2.425	Autre	Adulte	Frais	Feménin	Vendu	selling	Voisin
1	2018-10-17		1	68		8	2018-10-17	6h30	2018-10-17	14h20	2018-10-17	matin	1	Philantomba_monticola	Mammalia	Artiodactyla	Bovidae	LC	Class C	6.25	Piège	Adulte	Décomposé		Vendu	selling	Voisin
1	2018-10-30		1	68		8	2018-10-30	7	2018-10-30	15	2018-10-30	soir	1	Philantomba_monticola	Mammalia	Artiodactyla	Bovidae	LC	Class C	6.25	Piège	Adulte	Décomposé	Masculin	Consommation propre	domestic
1	2019-02-14		1	68		10	2019-02-13	19	2019-02-14	5		nuit	1	Philantomba_monticola	Mammalia	Artiodactyla	Bovidae	LC	Class C	6.25	Fusil	Adulte	Frais	Feménin	Vendu	selling	Passant
1	2019-02-21		1	68		12	2019-02-20	18	2019-02-20	6		nuit	1	Philantomba_monticola	Mammalia	Artiodactyla	Bovidae	LC	Class C	6.25	Fusil	Adulte	Frais	Feménin	À vendre	selling
1	2019-02-21		1	68		12	2019-02-20	18	2019-02-20	6		nuit	1	Philantomba_monticola	Mammalia	Artiodactyla	Bovidae	LC	Class C	6.25	Fusil	Adulte	Frais	Masculin	À vendre	selling
1	2018-10-25		1	68		7	2018-10-25	8	2018-10-25	15			-1
1	2018-11-02		1	68		3	2018-11-02	7	2018-11-02	10			-1								Piège
1	2018-11-03		1	68		9	2018-11-03	7h30	2018-11-03	16h30			-1
1	2018-11-04		1	68			2018-11-04		2018-11-04				-1
1	2018-11-14		1	68		5.5	2018-11-14	9	2018-11-14	14h40			-1
1	2018-11-17		1	68		7.5	2018-11-17	8	2018-11-17	15h40			-1
1	2018-11-19		1	68		5	2018-11-19	10h45	2018-11-19	15h40			-1
1	2018-11-25		1	68		7	2018-11-25	9	2018-11-25	16			-1
1	2018-11-26		1	68		7	2018-11-26	9	2018-11-26	16			-1
1	2018-12-07		1	68		7.5	2018-12-07	7h30	2018-12-07	15			-1
1	2018-12-15		1	68		7.5	2018-12-15	7h30	2018-12-15	15h			-1
1	2018-12-20		1	68		9	2018-12-20	8h	2018-12-20	17h			-1
1	2019-02-04		1	68		8	2019-02-04	8	2019-02-04	16			-1								fusil
1	2019-02-27		1	68		4	2019-02-27	6	2019-02-27	10			-1
1	2018-10-19		1	68		12	2018-10-18	6	2018-10-18	18			-1
1	2018-11-15		1	68		6.5	2018-11-15	8h15	2018-11-15	14h30			-1
1	2018-12-02		1	68		7	2018-12-02	7	2018-12-02	14			-1
1	2019-01-11		1	68			2019-01-11	6h					-1
1	2019-02-20		1	68									-1
7	2018-04-22	4	1	69		150	2018-04-16	8h	2018-04-22	14h		Matin	1	Atherurus_africanus	Mammalia	Rodentia	Hystricidae	LC	Class C	1.93	Piège	Adulte	Décomposé		Consommation propre	domestic
7	2018-04-28	4	1	69		117	2018-04-23	12h	2018-04-28	9h	2018-04-24		1	Atherurus_africanus	Mammalia	Rodentia	Hystricidae	LC	Class C	1.93	Fusil	Adulte	Boucané		Vendu	selling
7	2018-04-28	4	1	69		117	2018-04-23	12h	2018-04-28	9h	2018-04-27		1	Bitis_gabonica	Reptilia	Squamata	Viperidae	LC	Class C	3.5	Autre	Adulte	Boucané		Consommation propre	domestic
7	2018-05-27	5	1	69			2018-05-24		2018-05-27		2018-05-26	soir	1	Caracal_aurata	Mammalia	Carnivora	Felidae	VU	unknown	10.65	Piège	Adulte	Frais		Consommation propre	domestic
7	2018-04-28	4	1	69		117	2018-04-23	12h	2018-04-28	9h	2018-04-25		1	Cephalophus_dorsalis	Mammalia	Artiodactyla	Bovidae	NT	Class B	20	Fusil	Adulte	Boucané		Vendu	selling
7	2018-03-29	3	1	69		175	2018-03-22	10h	2018-03-29	17h	2018-03-27	12h	1	Cephalophus_spp.	Mammalia	Artiodactyla	Bovidae	various	Class B	16.21	Piège	Adulte	Frais		Vendu	selling	Voisin
7	2018-04-09	4	1	69		125	2018-04-04	11h	2018-04-09	16h			1	Cephalophus_spp.	Mammalia	Artiodactyla	Bovidae	various	Class B	16.21	Piège	Adulte	Boucané		Consommation propre	domestic
7	2018-05-27	5	1	69			2018-05-24		2018-05-27		2018-05-26	soir	1	Hyemoschus_aquaticus	Mammalia	Artiodactyla	Tragulidae	LC	Class C	10.85	Piège	Adulte	Frais		Vendu	selling	Revendeur/euse
7	2018-04-28	4	1	69		117	2018-04-23	12h	2018-04-28	9h	2018-04-25		1	Kinixys_erosa	Reptilia	Testudines	Testudinidae	DD	Class B	1.5	Autre	Adulte	Vivant		Consommation propre	domestic
7	2018-04-22	4	1	69		150	2018-04-16	8h	2018-04-22	14h		Matin	1	Philantomba_monticola	Mammalia	Artiodactyla	Bovidae	LC	Class C	6.25	Piège	Adulte	Frais		Consommation propre	domestic
7	2018-04-28	4	1	69		117	2018-04-23	12h	2018-04-28	9h	2018-04-24		1	Philantomba_monticola	Mammalia	Artiodactyla	Bovidae	LC	Class C	6.25	Fusil	Adulte	Boucané		Vendu	selling
7	2018-04-28	4	1	69		117	2018-04-23	12h	2018-04-28	9h	2018-04-24		1	Philantomba_monticola	Mammalia	Artiodactyla	Bovidae	LC	Class C	6.25	Fusil	Adulte	Boucané		Vendu	selling
7	2018-05-13	5	1	69		31	2018-05-12	8h	2018-05-13	15h	2018-05-12	Soir	1	Philantomba_monticola	Mammalia	Artiodactyla	Bovidae	LC	Class C	6.25	Fusil	Adulte	Frais		Vendu	selling	Revendeur/euse
7	2018-05-13	5	1	69		31	2018-05-12	8h	2018-05-13	15h	2018-05-12	Soir	1	Philantomba_monticola	Mammalia	Artiodactyla	Bovidae	LC	Class C	6.25	Fusil	Adulte	Frais		Vendu	selling	Revendeur/euse
7	2018-05-27	5	1	69			2018-05-24		2018-05-27		2018-05-26	soir	1	Philantomba_monticola	Mammalia	Artiodactyla	Bovidae	LC	Class C	6.25	Piège	Adulte	Frais		Consommation propre	domestic
7	2018-03-29	3	1	69		175	2018-03-22	10h	2018-03-29	17h	2018-03-27	11h	1	Tragelaphus_spekeii	Mammalia	Artiodactyla	Bovidae	LC	Class B	78	Piège	Adulte	Frais		Consommation propre et Vendu	both	Revendeur/euse
7	2018-03-08	3	1	69		76	2018-03-05	12h	2018-03-08	16h			-1								Piège
7	2018-03-16	3	1	69		35	2018-03-14	5h	2018-03-15	16h			-1
7	2018-05-08	5	1	69		55	2018-05-05	9h	2018-05-07	16h			-1
7	2018-03-15	3	1	69									-1
7	2018-03-22	3	1	69									-1
7	2018-03-24	3	1	69									-1
7	2018-03-25	3	1	69									-1
7	2018-03-26	3	1	69									-1
7	2018-03-27	3	1	69									-1
7	2018-03-28	3	1	69									-1
7	2018-04-04	4	1	69									-1
7	2018-04-05	4	1	69									-1
7	2018-04-06	4	1	69									-1
7	2018-04-07	4	1	69									-1
7	2018-04-08	4	1	69									-1
7	2018-04-16	4	1	69									-1
7	2018-04-17	4	1	69									-1
7	2018-04-18	4	1	69									-1
7	2018-04-19	4	1	69									-1
7	2018-04-21	4	1	69									-1
7	2018-04-23	4	1	69									-1
7	2018-04-24	4	1	69									-1
7	2018-04-26	4	1	69									-1
7	2018-04-27	4	1	69									-1
7	2018-05-06	5	1	69									-1
7	2018-05-07	5	1	69									-1
7	2018-05-12	5	1	69									-1
7	2018-05-25	5	1	69									-1
7	2018-05-26	5	1	69									-1
7	2018-05-31	5	1	69		10	2018-05-31	5h	2018-05-31	15h			-1
5	2018-03-06	3	5	70		9	2018-03-06	8h	2018-03-06	17h	2018-03-06	9h30	1	Aonyx_congicus	Mammalia	Carnivora	Mustelidae	NT	Class B	21.4	Piège	adulte	Décomposé		Consommation propre	domestic
5	2018-03-11	3	5	70		30.5	2018-03-10	8h30	2018-03-11	15h		12h	1	Atherurus_africanus	Mammalia	Rodentia	Hystricidae	LC	Class C	1.93	Piège	Jeune	Frais		Consommation propre	domestic
5	2018-04-25	4	5	70		3	2018-04-25	10h	2018-04-25	13h	2018-04-25		1	Atherurus_africanus	Mammalia	Rodentia	Hystricidae	LC	Class C	1.93	Piège	Adulte	Frais		Consommation propre	domestic
5	2018-04-27	4	5	70		7	2018-04-27	7h	2018-04-27	14h	2018-04-27		1	Cephalophus_callipygus	Mammalia	Artiodactyla	Bovidae	LC	Class B	18.25	Piège	Jeune	Frais		Consommation propre et Vendu	both	Taxi man
5	2018-05-07	5	5	70		7	2018-05-07	6h	2018-05-07	13h			1	Cephalophus_callipygus	Mammalia	Artiodactyla	Bovidae	LC	Class B	18.25	Piège	Adulte	Décomposé		Consommation propre et Vendu	both	Voisin
5	2018-05-19	5	5	70		4	2018-05-19	7h	2018-05-19	11h	2018-05-19	Matin	1	Cephalophus_callipygus	Mammalia	Artiodactyla	Bovidae	LC	Class B	18.25	Piège	Adulte	Frais		Consommation propre et Vendu	both	Revendeur/euse
5	2018-05-26	5	5	70		5	2018-05-26	7h	2018-05-26	12h	2018-05-26	Matin	1	Cephalophus_callipygus	Mammalia	Artiodactyla	Bovidae	LC	Class B	18.25	Piège	Jeune	Décomposé		Consommation propre et Vendu	both	Revendeur/euse
5	2018-05-10	5	5	70		7.5	2018-05-10	6h30	2018-05-10	14h	2018-05-10		1	Cephalophus_dorsalis	Mammalia	Artiodactyla	Bovidae	NT	Class B	20	Piège	Adulte	Décomposé		Consommation propre et À vendre	both
5	2018-03-11	3	5	70		30.5	2018-03-10	8h30	2018-03-11	15h		13h	1	Cephalophus_spp.	Mammalia	Artiodactyla	Bovidae	various	Class B	16.21	Piège	adulte	Frais		Vendu	selling	Taxi man
5	2018-03-29	3	5	70		5.5	2018-03-29	8h30	2018-03-29	14h	2018-03-29	12h	1	Cephalophus_spp.	Mammalia	Artiodactyla	Bovidae	various	Class B	16.21	Piège	adulte	Frais		Consommation propre et Vendu	both	Voisin
5	2018-03-10	3	5	70		7	2018-03-09	7h	2018-03-09	14h	2018-03-09	12h	1	Cricetomys_emini	Mammalia	Rodentia	Nesomyidae	LC	CLass C	1.3	Autre		Frais		Consommation propre	domestic
5	2018-04-22	4	5	70		4	2018-04-22	8h	2018-04-22	12h	2018-04-22		1	Cricetomys_emini	Mammalia	Rodentia	Nesomyidae	LC	CLass C	1.3	Piège	Adulte	Frais		Consommation propre	domestic
5	2018-05-05	5	5	70		2	2018-05-05	8h	2018-05-05	10h			1	Peliperdix_lathami/Pternistis_squamatus	Aves	Galliformes	Phasianidae	LC		0.269	Piège	Jeune	Décomposé
5	2018-03-13	3	5	70		8.5	2018-03-13	7h30	2018-03-13	16h	2018-03-13	15h	1	Phataginus_spp.	Mammalia	Pholidota	Manidae	VU/EN	Class C	2.425	Piège		Frais		Consommation propre	domestic
5	2018-05-04	5	5	70		77	2018-05-01	7h	2018-05-04	12h			1	Phataginus_spp.	Mammalia	Pholidota	Manidae	VU/EN	Class C	2.425	Piège	Adulte	Frais		Consommation propre	domestic
5	2018-05-04	5	5	70		77	2018-05-01	7h	2018-05-04	12h			1	Phataginus_spp.	Mammalia	Pholidota	Manidae	VU/EN	Class C	2.425	Autre	Jeune	Frais		Consommation propre	domestic
5	2018-06-14	6	5	70		118	2018-06-09	14h	2018-06-14	12h			1	Philantomba_monticola	Mammalia	Artiodactyla	Bovidae	LC	Class C	6.25	Piège	Adulte	Décomposé		consommation propre	domestic
5	2018-05-07	5	5	70		7	2018-05-07	6h	2018-05-07	13h			1	unspecified_rodent	Mammalia	Rodentia	unspecified_rodentia				Piège	Jeune	Frais
5	2018-04-16	4	5	70		5	2018-04-16	7h	2018-04-16	12h			1	Varanus_ornatus	Reptilia	Squamata	Varanidae	VU	Class B	5	Piège	Adulte	Frais		Consommation propre	domestic
5	2018-04-22	4	5	70		4	2018-04-22	8h	2018-04-22	12h	2018-04-22		1	Varanus_ornatus	Reptilia	Squamata	Varanidae	VU	Class B	5	Piège	Adulte	Frais		Consommation propre	domestic
5	2018-03-14	3	5	70		6	2018-03-14	8h	2018-03-14	14h			-1
5	2018-03-15	3	5	70		3	2018-03-15	9h	2018-03-15	12h			-1
5	2018-03-25	3	5	70		6	2018-03-25	10h	2018-03-25	16h			-1
5	2018-03-27	3	5	70		4	2018-03-27	10h	2018-03-27	14h			-1
5	2018-04-05	4	5	70			2018-04-05	8h	2018-04-05				-1
5	2018-04-15	4	5	70		1	2018-04-15	8h	2018-04-15	9h			-1
5	2018-04-17	4	5	70		7	2018-04-17	7h	2018-04-17	14h			-1
5	2018-04-18	4	5	70		7	2018-04-18	7h	2018-04-18	14h			-1
5	2018-04-21	4	5	70		3	2018-04-21	8h	2018-04-21	11h			-1
5	2018-05-01	5	5	70			2018-05-01	7h					-1
5	2018-05-13	5	5	70		5.5	2018-05-13	7h30	2018-05-13	13h			-1
5	2018-05-16	5	5	70		4	2018-05-16	8h00	2018-05-16	12h			-1
5	2018-05-29	5	5	70		4	2018-05-29	7h	2018-05-29	11h			-1
5	2018-05-30	5	5	70		5	2018-05-30	7h	2018-05-30	12h			-1
5	2018-06-01	6	5	70		5	2018-06-01	7h	2018-06-01	12h			-1
5	2018-06-05	6	5	70		4	2018-06-05	7h	2018-06-05	11h			-1
5	2018-06-06	6	5	70		6	2018-06-05	6h	2018-06-05	12h	2018-06-05		-1
5	2018-06-21	6	5	70		7	2018-06-21	7h	2018-06-21	14h			-1
5	2018-07-19	7	5	70		8	2018-07-19	8h	2018-07-19	16h			-1
5	2018-07-21	7	5	70		9	2018-07-21	7h	2018-07-21	16h			-1
5	2018-07-22	7	5	70		7	2018-07-22	8h	2018-07-22	15h			-1
5	2018-05-02	5	5	70									-1
5	2018-05-03	5	5	70									-1
5	2018-06-09	6	5	70									-1
5	2018-06-10	6	5	70			2018-06-10	14h					-1
5	2018-06-11	6	5	70			2018-06-11						-1
5	2018-06-12	6	5	70			2018-06-12	14h					-1
3	2018-11-10		9	71		6	2018-11-10	8h30	2018-11-10	14h30	2018-11-10		1	Atherurus_africanus	Mammalia	Rodentia	Hystricidae	LC	Class C	1.93	Piège	Adulte	Frais	Feménin	Vendu	selling
3	2018-11-09		9	71		8	2018-11-09	7h40	2018-11-09	15h30	2018-11-09		1	Cephalophus_callipygus	Mammalia	Artiodactyla	Bovidae	LC	Class B	18.25	Piège	Adulte	Frais	Masculin	Consommation propre et Vendu	both
3	2018-10-25		9	71		4	2018-10-25	7h30	2018-10-25	11h30	2018-10-25	matin	1	Cephalophus_dorsalis	Mammalia	Artiodactyla	Bovidae	NT	Class B	20	Piège		Frais	Masculin	Vendu	selling
3	2019-02-04		9	71		9	2019-02-04	07:30:00	2019-02-04	16:40:00		matin	1	Cephalophus_nigrifrons	Mammalia	Artiodactyla	Bovidae	LC	Class C	13.9	Piège	Adulte	Frais	Feménin	Consommation propre et Vendu	both	Voisin
3	2018-11-14		9	71		5	2018-11-14	9h30	2018-11-14	13h30	2018-11-14		1	Philantomba_monticola	Mammalia	Artiodactyla	Bovidae	LC	Class C	6.25	Piège	Jeune	Frais	Masculin	Vendu	selling	Voisin
3	2018-10-26		9	71		10	2018-10-26	7h30	2018-10-26	17h30	2018-10-26	jour	1	Potamochoerus_porcus	Mammalia	Artiodactyla	Suidae	LC	Class B	70	Piège	Adulte	Frais	Masculin	À vendre	selling
3	2019-02-07		9	71		8.5	2019-02-07	07:40:00	2019-02-07	16:15:00			-1
3	2018-10-25		2	72		6	2018-10-25	8h30	2018-10-25	14h30	2018-10-25	matin	1	Atherurus_africanus	Mammalia	Rodentia	Hystricidae	LC	Class C	1.93	Piège	Adulte	Frais	Masculin	Consommation propre et Vendu	both
3	2018-11-11		2	72		9	2018-11-11	7h30	2018-11-11	16h30	2018-11-11		1	Atherurus_africanus	Mammalia	Rodentia	Hystricidae	LC	Class C	1.93	Piège	Jeune	Frais	Masculin	Vendu	selling	Passant
3	2019-01-12		2	72		6	2019-01-12	8h30	2019-01-12	14h30	2019-01-12	matin	1	Atherurus_africanus	Mammalia	Rodentia	Hystricidae	LC	Class C	1.93	Piège	Adulte	Frais	Masculin	Consommation propre	domestic
3	2018-10-26		2	72		10	2018-10-26	7h30	2018-10-26	17h30	2018-10-26	matin	1	Cephalophus_callipygus	Mammalia	Artiodactyla	Bovidae	LC	Class B	18.25	Piège	Jeune	Frais	Feménin	Consommation propre et à vendre	both
3	2018-10-27		2	72		14	2018-10-27	1h30	2018-10-27	15h30	2018-10-27	jour	1	Cephalophus_callipygus	Mammalia	Artiodactyla	Bovidae	LC	Class B	18.25	Piège	Adulte	Frais	Masculin	Vendu	selling
3	2018-10-30		2	72		6	2018-10-30	7h30	2018-10-30	13h30	2018-10-30	matin	1	Cephalophus_callipygus	Mammalia	Artiodactyla	Bovidae	LC	Class B	18.25	Piège	Adulte	Frais	Masculin	Consommation propre et à vendre	both
3	2018-11-10		2	72		7.5	2018-11-10	6h40	2018-11-10	14	2018-11-10		1	Cephalophus_callipygus	Mammalia	Artiodactyla	Bovidae	LC	Class B	18.25	Piège	Adulte	Frais	Feménin	Consommation propre et Vendu	both
3	2018-12-29		2	72		7	2018-12-29	8h30	2018-12-29	15h30	29/2018	matin	1	Cephalophus_callipygus	Mammalia	Artiodactyla	Bovidae	LC	Class B	18.25	Piège	Adulte	Frais	Masculin	Consommation propre et Vendu	both	Passant
3	2018-12-31		2	72		8	2018-12-31	8h30	2018-12-31	16h30	31/2018	matin	1	Cephalophus_callipygus	Mammalia	Artiodactyla	Bovidae	LC	Class B	18.25	Piège	Adulte	Frais	Feménin	Consommation propre et Vendu	both	Passant
3	2019-01-15		2	72		7	2019-01-15	8h30	2019-01-15	15h20	2019-01-15	jour	1	Cephalophus_callipygus	Mammalia	Artiodactyla	Bovidae	LC	Class B	18.25	Piège	Jeune	Frais	Masculin	Consommation propre et Vendu	both	Voisin
3	2018-11-02		2	72			2018-11-02	16h30	2018-11-02	16h30	2018-11-02	matin	1	Cephalophus_dorsalis	Mammalia	Artiodactyla	Bovidae	NT	Class B	20	Piège	Adulte	Frais	Feménin	Consommation propre et à vendre	both
3	2018-11-05		2	72		5.5	2018-11-05	8	2018-11-05	13h30	2018-11-05	matin	1	Cephalophus_dorsalis	Mammalia	Artiodactyla	Bovidae	NT	Class B	20	Piège	Adulte	Frais	Feménin	Consommation propre et à vendre	both
3	2018-11-08		2	72		9	2018-11-08	7	2018-11-08	16	2018-11-08		1	Cephalophus_dorsalis	Mammalia	Artiodactyla	Bovidae	NT	Class B	20	Piège	Jeune	Frais	Feménin	Vendu	selling
3	2018-11-23		2	72		6.5	2018-11-23	7h30	2018-11-23	14	2018-11-23		1	Cephalophus_dorsalis	Mammalia	Artiodactyla	Bovidae	NT	Class B	20	Piège	Adulte	Frais	Feménin	Consommation propre et Vendu	both	Passant
3	2018-11-26		2	72		5	2018-11-26	9h30	2018-11-26	14h30	2018-11-26		1	Cephalophus_dorsalis	Mammalia	Artiodactyla	Bovidae	NT	Class B	20	Piège	Adulte	Frais	Masculin	Vendu	selling	Passant
3	2019-01-17		2	72		7.5	2019-01-17	8h40	2019-01-17	16h	2019-01-17	matin	1	Cephalophus_dorsalis	Mammalia	Artiodactyla	Bovidae	NT	Class B	20	Piège	Adulte	Frais	Masculin	Consommation propre et Vendu	both	Voisin
3	2018-12-01		2	72		6	2018-12-01	8h30	2018-12-01	14h30	2018-12-01	jour	1	Cephalophus_nigrifrons	Mammalia	Artiodactyla	Bovidae	LC	Class C	13.9	Piège	Adulte	Frais	Masculin	Consommation propre et Vendu	both	Passant
3	2019-01-23		2	72		5.5	2019-01-23	9h30	2019-01-23	15h	2019-01-23	matin	1	Philantomba_monticola	Mammalia	Artiodactyla	Bovidae	LC	Class C	6.25	Piège	Adulte	Frais	Masculin	Vendu	selling	Passant
3	2018-10-29		2	72		5.5	2018-10-29	6	2018-10-29	11h30			-1
3	2018-11-04		2	72		5.5	2018-11-04	8	2018-11-04	13h30			-1
3	2018-11-06		2	72		5	2018-11-06	7	2018-11-06	12			-1
3	2018-11-14		2	72		7	2018-11-14	7h30	2018-11-14	14h40			-1
3	2018-11-30		2	72		8	2018-11-30	7h30	2018-11-30	15h30			-1
7	2018-03-06	3	2	73		17	2018-03-05	15h	2018-03-06	8h	2018-03-05	23h	1	Atherurus_africanus	Mammalia	Rodentia	Hystricidae	LC	Class C	1.93	Fusil	Jeune	Frais		Vendu	selling	Voisin
7	2018-03-12	3	2	73		26	2018-03-11	9h	2018-03-12	11h	2018-03-11	20h	1	Atherurus_africanus	Mammalia	Rodentia	Hystricidae	LC	Class C	1.93	Piège		Frais		À vendre	selling	Revendeur/euse
7	2018-07-02	7	2	73		7	2018-07-02	7h	2018-07-02	14h	2018-07-02	matin	1	Atherurus_africanus	Mammalia	Rodentia	Hystricidae	LC	Class C	1.93	Piège	Adulte	Frais		Vendu	selling	Revendeur/euse
7	2018-07-03	7	2	73		8	2018-07-03	6h	2018-07-03	14h	2018-07-03	soir	1	Atherurus_africanus	Mammalia	Rodentia	Hystricidae	LC	Class C	1.93	Piège	Adulte	Décomposé		Consommation propre	domestic
7	2018-03-26	3	2	73		7	2018-03-26	7h	2018-03-26	14h	2018-03-26	9h	1	Bitis_gabonica	Reptilia	Squamata	Viperidae	LC	Class C	3.5	Autre	Adulte	Frais		Consommation propre	domestic
7	2018-05-11	5	2	73		8	2018-05-10	6h	2018-05-10	14h	2018-05-10		1	Cephalophus_callipygus	Mammalia	Artiodactyla	Bovidae	LC	Class B	18.25	Piège	Adulte			Consommation propre et À vendre	both	Revendeur/euse
7	2018-05-11	5	2	73		8	2018-05-10	6h	2018-05-10	14h	2018-05-10		1	Cephalophus_callipygus	Mammalia	Artiodactyla	Bovidae	LC	Class B	18.25	Piège	Adulte	Frais		Consommation propre et À vendre	both	Revendeur/euse
7	2018-05-11	5	2	73		8	2018-05-10	6h	2018-05-10	14h	2018-05-10		1	Cephalophus_callipygus	Mammalia	Artiodactyla	Bovidae	LC	Class B	18.25	Piège	Adulte	Boucané		Consommation propre et À vendre	both
7	2018-06-25	6	2	73		10	2018-06-25	5h	2018-06-25	15h	2018-06-25	Matin	1	Cephalophus_callipygus	Mammalia	Artiodactyla	Bovidae	LC	Class B	18.25	Piège	Adulte	Frais		Vendu	selling	Revendeur/euse
7	2018-05-05	5	2	73		79	2018-05-02	7h	2018-05-05	14h			1	Cephalophus_dorsalis	Mammalia	Artiodactyla	Bovidae	NT	Class B	20	Piège	Adulte	Boucané		Consommation propre	domestic
7	2018-05-26	5	2	73		77	2018-05-23	6h	2018-05-26	11h	2018-05-26	matin	1	Cephalophus_dorsalis	Mammalia	Artiodactyla	Bovidae	NT	Class B	20	Piège	Adulte			Vendu	selling	Voisin
7	2018-05-30	5	2	73		29.5	2018-05-29	8h30	2018-05-30	14h	2018-05-30	soir	1	Cephalophus_dorsalis	Mammalia	Artiodactyla	Bovidae	NT	Class B	20	Piège	Adulte	Boucané		À vendre	selling	Revendeur/euse
7	2018-06-10	6	2	73		3	2018-06-10	7h	2018-06-10	10h	2018-06-10	Matin	1	Cephalophus_dorsalis	Mammalia	Artiodactyla	Bovidae	NT	Class B	20	Piège	Jeune	Boucané		Consommation propre et Vendu	both	Revendeur/euse
7	2018-06-25	6	2	73		10	2018-06-25	5h	2018-06-25	15h	2018-06-25	Matin	1	Cephalophus_dorsalis	Mammalia	Artiodactyla	Bovidae	NT	Class B	20	Piège	Adulte	Décomposé		Consommation propre	domestic
7	2018-07-05	7	2	73		8	2018-07-05	8h	2018-07-05	16h	2018-07-05	Soir	1	Cephalophus_dorsalis	Mammalia	Artiodactyla	Bovidae	NT	Class B	20	Piège	Adulte	Frais		Vendu	selling	Revendeur/euse
7	2018-05-11	5	2	73		8	2018-05-10	6h	2018-05-10	14h	2018-05-10		1	Cephalophus_silvicultor	Mammalia	Artiodactyla	Bovidae	NT	Class A	72.5	Piège	Adulte	Boucané		Consommation propre et À vendre	both	Revendeur/euse
7	2018-03-12	3	2	73		26	2018-03-11	9h	2018-03-12	11h	2018-03-12	2h	1	Cephalophus_spp.	Mammalia	Artiodactyla	Bovidae	various	Class B	16.21	Piège		Frais		À vendre	selling	Revendeur/euse
7	2018-06-16	6	2	73		8	2018-06-16	6h	2018-06-16	14h	2018-06-16	Matin	1	Cercocebus_agilis	Mammalia	Primates	Cercopithecidae	LC	Class A	8	Fusil	Adulte	Frais		Vendu	selling	Revendeur/euse
7	2018-06-02	6	2	73		29	2018-06-01	7h	2018-06-02	12h	2018-06-02	Matin	1	Cercopithecus_neglectus	Mammalia	Primates	Cercopithecidae	LC		5.48	Fusil	Adulte	Frais		Vendu	selling	Revendeur/euse
7	2018-06-16	6	2	73		8	2018-06-16	6h	2018-06-16	14h	2018-06-16	Matin	1	Cercopithecus_nictitans	Mammalia	Primates	Cercopithecidae	NT	Class C	5.41	Fusil	Adulte	Frais		Vendu	selling	Revendeur/euse
7	2018-06-16	6	2	73		8	2018-06-16	6h	2018-06-16	14h	2018-06-16	Matin	1	Cercopithecus_nictitans	Mammalia	Primates	Cercopithecidae	NT	Class C	5.41	Fusil	Adulte	Frais		Consommation propre	domestic
7	2018-06-26	6	2	73		6	2018-06-26	7h	2018-06-26	13h	2018-06-26	Matin	1	Cercopithecus_nictitans	Mammalia	Primates	Cercopithecidae	NT	Class C	5.41	Fusil	Adulte	Frais		Vendu	selling	Revendeur/euse
7	2018-07-02	7	2	73		7	2018-07-02	7h	2018-07-02	14h	2018-07-02	matin	1	Crossarchus_obscurus	Mammalia	Carnivora	Herpestidae	LC		1.25	Piège	Adulte	Décomposé		Consommation propre	domestic
7	2018-03-17	3	2	73		10	2018-03-16	18h	2018-03-17	4h	2018-03-16	23h	1	Kinixys_erosa	Reptilia	Testudines	Testudinidae	DD	Class B	1.5	Autre	Adulte	Vivant		Consommation propre	domestic
7	2018-03-20	3	2	73		7	2018-03-19	22h	2018-03-20	5h	2018-03-20	2h	1	Kinixys_erosa	Reptilia	Testudines	Testudinidae	DD	Class B	1.5	Autre	Adulte	Vivant		Vendu	selling	Voisin
7	2018-05-19	5	3	73		31	2018-05-18	8h	2018-05-19	15h	2018-05-19	Soir	1	Kinixys_erosa	Reptilia	Testudines	Testudinidae	DD	Class B	1.5	Piège	Adulte	Frais		Consommation propre	domestic
7	2018-06-25	6	2	73		10	2018-06-25	5h	2018-06-25	15h	2018-06-25	Matin	1	Kinixys_erosa	Reptilia	Testudines	Testudinidae	DD	Class B	1.5	Piège	Adulte	Vivant		Consommation propre	domestic
7	2018-06-02	6	2	73		29	2018-06-01	7h	2018-06-02	12h	2018-06-02	Matin	1	Lophocebus_albigena	Mammalia	Primates	Cercopithecidae	LC	Class C	7.69	Fusil	Adulte	Frais		Vendu	selling	Revendeur/euse
7	2018-06-02	6	2	73		29	2018-06-01	7h	2018-06-02	12h	2018-06-02	soir	1	Lophocebus_albigena	Mammalia	Primates	Cercopithecidae	LC	Class C	7.69	Fusil	Adulte	Frais		Vendu	selling	Revendeur/euse
7	2018-03-12	3	2	73		26	2018-03-11	9h	2018-03-12	11h	2018-03-12	3h	1	Nandinia_binotata	Mammalia	Carnivora	Nandiniidae	LC	Class C	2	Piège		Frais		À vendre	selling	Voisin
7	2018-03-12	3	2	73		26	2018-03-11	9h	2018-03-12	11h	2018-03-12	5h	1	Phataginus_spp.	Mammalia	Pholidota	Manidae	VU/EN	Class C	2.425	Autre		Vivant		À vendre	selling	Revendeur/euse
7	2018-03-14	3	2	73		29	2018-03-13	6h	2018-03-14	11h	2018-03-13	10h	1	Phataginus_spp.	Mammalia	Pholidota	Manidae	VU/EN	Class C	2.425	Autre		Vivant				Voisin
7	2018-03-20	3	2	73		7	2018-03-19	22h	2018-03-20	5h	2018-03-20	3h	1	Phataginus_spp.	Mammalia	Pholidota	Manidae	VU/EN	Class C	2.425	Autre	Jeune	Frais		Consommation propre	domestic
7	2018-05-30	5	2	73		29.5	2018-05-29	8h30	2018-05-30	14h	2018-05-30	Soir	1	Phataginus_spp.	Mammalia	Pholidota	Manidae	VU/EN	Class C	2.425	Piège	Adulte	Vivant		À vendre	selling	Revendeur/euse
7	2018-07-05	7	2	73		8	2018-07-05	8h	2018-07-05	16h	2018-07-05	Soir	1	Phataginus_spp.	Mammalia	Pholidota	Manidae	VU/EN	Class C	2.425	Piège	Adulte	Frais		Vendu	selling	Revendeur/euse
7	2018-03-06	3	2	73		17	2018-03-05	15h	2018-03-06	8h			1	Philantomba_monticola	Mammalia	Artiodactyla	Bovidae	LC	Class C	6.25	Fusil	Adulte	Frais		Vendu	selling	Voisin
7	2018-03-06	3	2	73		17	2018-03-05	15h	2018-03-06	8h			1	Philantomba_monticola	Mammalia	Artiodactyla	Bovidae	LC	Class C	6.25	?						Voisin
7	2018-03-06	3	2	73		17	2018-03-05	15h	2018-03-06	8h			1	Philantomba_monticola	Mammalia	Artiodactyla	Bovidae	LC	Class C	6.25							Voisin
7	2018-03-06	3	2	73		17	2018-03-05	15h	2018-03-06	8h			1	Philantomba_monticola	Mammalia	Artiodactyla	Bovidae	LC	Class C	6.25							Voisin
7	2018-03-06	3	2	73		17	2018-03-05	15h	2018-03-06	8h			1	Philantomba_monticola	Mammalia	Artiodactyla	Bovidae	LC	Class C	6.25							Voisin
7	2018-03-17	3	2	73		10	2018-03-16	18h	2018-03-17	4h	2018-03-16	2h	1	Philantomba_monticola	Mammalia	Artiodactyla	Bovidae	LC	Class C	6.25	Fusil	Adulte	Frais		Vendu	selling	Voisin
7	2018-04-26	4	2	73		28	2018-04-25	19h	2018-04-26	23h	2018-04-25	21h	1	Philantomba_monticola	Mammalia	Artiodactyla	Bovidae	LC	Class C	6.25	Fusil	Adulte	Frais		Consommation propre	domestic
7	2018-05-05	5	2	73		79	2018-05-02	7h	2018-05-05	14h			1	Philantomba_monticola	Mammalia	Artiodactyla	Bovidae	LC	Class C	6.25		Adulte	Frais		à vendre	selling	Voisin
7	2018-05-15	5	2	73		33	2018-05-14	8h	2018-05-15	17h	2018-05-14		1	Philantomba_monticola	Mammalia	Artiodactyla	Bovidae	LC	Class C	6.25	Piège	Adulte	Boucané		Consommation propre	domestic
7	2018-05-19	5	2	73		31	2018-05-18	8h	2018-05-19	15h	2018-05-18	Soir	1	Philantomba_monticola	Mammalia	Artiodactyla	Bovidae	LC	Class C	6.25	Piège	Adulte	Frais		Vendu	selling
7	2018-05-19	5	2	73		31	2018-05-18	8h	2018-05-19	15h	2018-05-18	Soir	1	Philantomba_monticola	Mammalia	Artiodactyla	Bovidae	LC	Class C	6.25	Piège	Adulte	Frais		Consommation propre	domestic
7	2018-07-03	7	2	73		8	2018-07-03	6h	2018-07-03	14h	2018-07-03	soir	1	Philantomba_monticola	Mammalia	Artiodactyla	Bovidae	LC	Class C	6.25	Piège	Adulte	Frais		Vendu	selling	Revendeur/euse
7	2018-04-26	4	2	73		28	2018-04-25	19h	2018-04-26	23h	2018-04-25	20h	1	Thryonomys_swinderianus	Mammalia	Rodentia	Thryonomyidae	LC	Class C	4.06	Piège	Jeune	Frais		Vendu	selling	Voisin
7	2018-03-06	3	2	73		17	2018-03-05	15h	2018-03-06	8h	2018-03-05	17h	1	unspecified_monkey	Mammalia	Primates	unspecified_primates				Fusil	Adulte	Frais		Consommation propre	domestic
7	2018-03-19	3	2	73		11	2018-03-18	20h	2018-03-19	7h			-1
7	2018-06-15	6	2	73		13	2018-06-15	7h	2018-06-15	20h			-1								Piège
7	2018-03-11	3	2	73									-1
7	2018-03-13	3	2	73									-1
7	2018-03-16	3	2	73									-1
7	2018-05-14	5	2	73									-1
7	2018-05-18	5	2	73									-1
7	2018-05-23	5	2	73									-1
7	2018-05-25	5	2	73									-1
7	2018-05-29	5	2	73									-1
7	2018-06-01	6	2	73									-1
7	2018-06-04	6	2	73		9	2018-06-04	7h	2018-06-04	16h			-1
6	2018-04-29	4	13	74		9	2018-04-29	9h	2018-04-29	18h	2018-04-29	15h	1	Atherurus_africanus	Mammalia	Rodentia	Hystricidae	LC	Class C	1.93	Chien	Jeune	Vivant		Consommation propre	domestic
6	2018-05-25	5	13	74		9	2018-05-25	9h	2018-05-25	18h	2018-05-25	soir	1	Atherurus_africanus	Mammalia	Rodentia	Hystricidae	LC	Class C	1.93	Piège	Adulte	Frais		consommation propre	domestic
6	2018-05-22	5	13	74		11	2018-05-22	7h	2018-05-22	18h	2018-05-22	matin	1	Cephalophus_dorsalis	Mammalia	Artiodactyla	Bovidae	NT	Class B	20	Piège	Jeune	Frais		Consommation propre et Vendu	both	Passant
6	2018-05-15	5	13	74		9.5	2018-05-15	7h30	2018-05-15	17h	2018-05-15	matin	1	Civettictis_civetta	Mammalia	Carnivora	Herpestidae	LC	Class B	12	Piège	Jeune	Décomposé		consommation propre	domestic
6	2018-06-22	6	13	74		7	2018-06-22	9h	2018-06-22	16h	2018-06-22	Soir	1	Kinixys_erosa	Reptilia	Testudines	Testudinidae	DD	Class B	1.5	Autre	Adulte	Vivant		Consommation propre	domestic
6	2018-04-21	4	13	74			2018-04-21	8h	2018-04-21		2018-04-21	10h10	1	Philantomba_monticola	Mammalia	Artiodactyla	Bovidae	LC	Class C	6.25	Piège	Jeune	Vivant		Consommation propre	domestic
6	2018-07-04	7	13	74		10	2018-07-04	6h	2018-07-04	16h	2018-07-04	matin	1	Philantomba_monticola	Mammalia	Artiodactyla	Bovidae	LC	Class C	6.25	Piège	Adulte	Décomposé		Consommation propre	domestic
6	2018-05-28	5	13	74		5.5	2018-05-28	7h30	2018-05-28	13h	2018-05-28	matin	1	Varanus_ornatus	Reptilia	Squamata	Varanidae	VU	Class B	5	Piège	Adulte	Frais		consommation propre	domestic
6	2018-04-05	4	13	74									-1
6	2018-04-16	4	13	74									-1
10	2018-11-05		11	75		16	2018-11-05	19	2018-11-06	11	2018-11-06	nuit	1	Atherurus_africanus	Mammalia	Rodentia	Hystricidae	LC	Class C	1.93	Fusil	Adulte	Frais	Masculin	Vendu	selling
10	2019-02-06		11	75		22	2019-02-06	8	2019-02-07	6		nuit	1	Atherurus_africanus	Mammalia	Rodentia	Hystricidae	LC	Class C	1.93	Fusil	Jeune	Frais	Masculin	Consommation propre	domestic
10	2018-10-29		11	75		9	2018-10-29	8	2018-10-29	17	2018-10-29	jour	1	Bdeogale_nigripes	Mammalia	Carnivora	Herpestidae	LC	Class C	2.5	Piège	Jeune	Boucané	Feménin	Consommation propre	domestic
10	2018-10-19		11	75		9	2018-10-19	6	2018-10-19	15	2018-10-19	jour	1	Bitis_gabonica	Reptilia	Squamata	Viperidae	LC	Class C	3.5	Autre	Adulte			Consommation propre	domestic
10	2018-12-07		11	75		5	2018-12-07	10	2018-12-07	15	2018-12-07	matin	1	Cephalophus_dorsalis	Mammalia	Artiodactyla	Bovidae	NT	Class B	20	Piège	Jeune	Frais	Feménin	Vendu	selling
10	2018-12-30		11	75		9	2018-12-30	7h	2018-12-30	16h	2018-12-30	matin	1	Cephalophus_dorsalis	Mammalia	Artiodactyla	Bovidae	NT	Class B	20	Fusil	Jeune	Frais	Feménin	Consommation propre	domestic
10	2019-01-14		11	75		9	2019-01-14	7h	2019-01-14	16h	2019-01-14	matin	1	Cephalophus_dorsalis	Mammalia	Artiodactyla	Bovidae	NT	Class B	20	Fusil		Frais	Masculin	Vendu	selling	Revendeur/euse
10	2019-01-28		11	75		13	2019-01-27	19h	2019-01-28	8h	2019-01-28	nuit	1	Cephalophus_dorsalis	Mammalia	Artiodactyla	Bovidae	NT	Class B	20	Fusil	Jeune	Boucané	Feménin	Consommation propre et à vendre	both
10	2019-02-06		11	75		22	2019-02-06	8	2019-02-07	6		matin	1	Cephalophus_dorsalis	Mammalia	Artiodactyla	Bovidae	NT	Class B	20	Fusil	Adulte	Frais	Masculin	Vendu	selling	bayam sellam
10	2018-12-06		11	75		10	2018-12-05	20	2018-12-06	6	2018-12-06	nuit	1	Nandinia_binotata	Mammalia	Carnivora	Nandiniidae	LC	Class C	2	Fusil	Adulte	Frais	Masculin	Consommation propre	domestic
10	2018-12-13		11	75		137	2018-12-07	17h	2018-12-13	10h			1	Nandinia_binotata	Mammalia	Carnivora	Nandiniidae	LC	Class C	2	Fusil	Adulte	Frais	Masculin	Vendu	selling	Revendeur/euse
10	2019-01-22		11	75		4	2019-01-22	6h	2019-01-22	10h	2019-01-22	soir	1	Nandinia_binotata	Mammalia	Carnivora	Nandiniidae	LC	Class C	2	Fusil	Jeune	Frais	Feménin	Consommation propre	domestic
10	2019-01-27		11	75			2019-01-27	17h	2019-01-27	6h	2019-01-27	nuit	1	Nandinia_binotata	Mammalia	Carnivora	Nandiniidae	LC	Class C	2	Fusil	Adulte	Frais	Masculin	Vendu	selling	Passant
10	2018-11-05		11	75		16	2018-11-05	19	2018-11-06	11	2018-11-06	nuit	1	Philantomba_monticola	Mammalia	Artiodactyla	Bovidae	LC	Class C	6.25	Fusil	Adulte	Frais	Masculin	Consommation propre	domestic
10	2018-12-06		11	75		10	2018-12-05	20	2018-12-06	6	2018-12-06	nuit	1	Philantomba_monticola	Mammalia	Artiodactyla	Bovidae	LC	Class C	6.25	Fusil	Adulte	Frais	Feménin	Vendu	selling
10	2018-12-06		11	75		10	2018-12-05	20	2018-12-06	6	2018-12-06	nuit	1	Philantomba_monticola	Mammalia	Artiodactyla	Bovidae	LC	Class C	6.25	Fusil	Jeune	Frais	Feménin	Vendu	selling
10	2018-12-13		11	75		137	2018-12-07	17h	2018-12-13	10h			1	Philantomba_monticola	Mammalia	Artiodactyla	Bovidae	LC	Class C	6.25	Fusil	Adulte	Frais	Masculin	Vendu	selling	Revendeur/euse
10	2018-12-13		11	75		137	2018-12-07	17h	2018-12-13	10h			1	Philantomba_monticola	Mammalia	Artiodactyla	Bovidae	LC	Class C	6.25	Fusil	Adulte	Frais	Feménin	Consommation propre	domestic
10	2019-02-15		11	75		14	2019-02-15	18	2019-02-15	8		nuit	1	Smutsia_gigantea	Mammalia	Pholidota	Manidae	VU	Class A	33	Fusil	Adulte	Frais	Feménin	Consommation propre et Vendu	both	Bayam sellam
10	2018-11-18		11	75			2018-11-17		2018-11-18				-1
10	2018-11-26		11	75		33	2018-11-25	7	2018-11-26	16			-1
10	2019-01-02		11	75		1	2019-01-02	7h	2019-01-02	8h			-1
10	2019-02-12		11	75		23	2019-02-12	7	2019-02-13	6			-1
10	2019-02-25		11	75		23	2019-02-25	7	2019-02-26	6			-1
10	2018-11-17		11	75									-1
10	2018-11-25		11	75									-1
10	2018-12-08		11	75									-1
10	2018-12-09		11	75									-1
10	2018-12-10		11	75									-1
6	2018-06-01	6	2	77		9	2018-06-01	7h	2018-06-01	16h	2018-06-01	matin	1	Atherurus_africanus	Mammalia	Rodentia	Hystricidae	LC	Class C	1.93	Chien	Adulte	Frais		vendu	selling
6	2018-06-15	6	2	77		8	2018-06-15	6h	2018-06-15	14h	2018-06-15	matin	1	Cephalophus_silvicultor	Mammalia	Artiodactyla	Bovidae	NT	Class A	72.5	Piège	Adulte	Frais		Consommation propre et Vendu	both
6	2018-06-16	6	2	77		8	2018-06-16	7h	2018-06-16	15h	2018-06-16	matin	1	Cephalophus_silvicultor	Mammalia	Artiodactyla	Bovidae	NT	Class A	72.5	Piège	Adulte	Décomposé		Consommation propre	domestic
6	2018-06-18	6	2	77		4.5	2018-06-18	7h45	2018-06-18	12h	2018-06-18	matin	1	Dendrohyrax_dorsalis	Mammalia	Hyracoidea	Procaviidae	LC	Class C	3.175	Piège	Adulte	Frais		Consommation propre	domestic
6	2018-05-22	5	2	77		11	2018-05-22	7h	2018-05-22	18h	2018-05-22	matin	1	Nandinia_binotata	Mammalia	Carnivora	Nandiniidae	LC	Class C	2	Piège	Jeune	Décomposé		consommation propre	domestic
6	2018-06-09	6	2	77		8	2018-06-09	7h	2018-06-09	15h			-1
6	2018-06-12	6	2	77		7	2018-06-12	7h	2018-06-12	14h			-1
3	2018-10-28		1	78		9	2018-10-28	6h30	2018-10-28	15h45	2018-10-28	matin	1	Atherurus_africanus	Mammalia	Rodentia	Hystricidae	LC	Class C	1.93	Piège	Adulte	Frais	Masculin	Vendu	selling
3	2018-10-27		1	78		10	2018-10-27	7h40	2018-10-27	17h30	2018-10-27	jour	1	Cephalophus_callipygus	Mammalia	Artiodactyla	Bovidae	LC	Class B	18.25	Piège	Adulte	Frais	Feménin	Consommation propre et Vendu	both
3	2018-11-15		1	78		7	2018-11-15	6h30	2018-11-15	13h30	2018-11-15		1	Cephalophus_dorsalis	Mammalia	Artiodactyla	Bovidae	NT	Class B	20	Piège	Jeune	Frais	Masculin	Consommation propre et Vendu	both	Voisin
3	2018-12-14		1	78		8	2018-12-14	7h30	2018-12-14	15h30	2018-12-14	jour	1	Cephalophus_dorsalis	Mammalia	Artiodactyla	Bovidae	NT	Class B	20	Piège	Adulte	Frais	Feménin	Consommation propre et Vendu	both
3	2018-10-26		1	78		5.5	2018-10-26	9h10	2018-10-26	14h30			-1
3	2018-10-29		1	78		5	2018-10-29	7h30	2018-10-29	12h30			-1
3	2018-11-02		1	78			2018-11-02		2018-11-02				-1
3	2018-11-06		1	78		6	2018-11-06	8	2018-11-06	14			-1
3	2018-11-11		1	78		8	2018-11-11	7	2018-11-11	15			-1
3	2018-11-17		1	78		7	2018-11-17	7h30	2018-11-17	14h40			-1
3	2018-11-18		1	78		8	2018-11-18	7h30	2018-11-18	15h30			-1
3	2018-11-27		1	78		6	2018-11-27	10h30	2018-11-27	16h30			-1
3	2018-12-10		1	78		10	2018-12-10	7h30	2018-12-10	17h30			-1
3	2018-12-29		1	78		9	2018-12-29	7h40	2018-12-29	16h30			-1
4	2018-03-20	3	7	79		75	2018-03-17	7h	2018-03-20	10h			1	Atherurus_africanus	Mammalia	Rodentia	Hystricidae	LC	Class C	1.93	Piège		Boucané		Consommation propre	domestic
4	2018-03-17	3	7	79									-1
7	2018-06-16	6	4	80		8	2018-06-16	6h	2018-06-16	14h	2018-06-16	Matin	1	Agelastes_niger	Aves	Galliformes	Numididae		Class C		Piège	Adulte	Frais		Consommation propre	domestic
7	2018-06-21	6	4	80		9	2018-06-21	7h	2018-06-21	16h	2018-06-21	soir	1	Aonyx_congicus	Mammalia	Carnivora	Mustelidae	NT	Class B	21.4	Fusil	Adulte	Frais		Vendu	selling	Revendeur/euse
7	2018-03-06	3	4	80		13	2018-03-06	20h	2018-03-07	9h			1	Atherurus_africanus	Mammalia	Rodentia	Hystricidae	LC	Class C	1.93	Fusil	Adulte	Frais		Vendu	selling	Revendeur/euse
7	2018-03-06	3	4	80		13	2018-03-06	20h	2018-03-07	9h			1	Atherurus_africanus	Mammalia	Rodentia	Hystricidae	LC	Class C	1.93
7	2018-03-19	3	4	80		15	2018-03-18	19h	2018-03-19	10h	2018-03-18	22h	1	Atherurus_africanus	Mammalia	Rodentia	Hystricidae	LC	Class C	1.93	Piège	Adulte	Frais		Vendu	selling	Revendeur/euse
7	2018-05-14	5	4	80		40	2018-05-13	5h	2018-05-14	21h	2018-05-14	Soir	1	Atherurus_africanus	Mammalia	Rodentia	Hystricidae	LC	Class C	1.93	Piège	Adulte	Boucané		À vendre	selling	Voisin
7	2018-05-14	5	4	80		40	2018-05-13	5h	2018-05-14	21h	2018-05-15	Soir	1	Atherurus_africanus	Mammalia	Rodentia	Hystricidae	LC	Class C	1.93	Piège	Adulte	Boucané		Consommation propre	domestic
7	2018-05-19	5	4	80		47	2018-05-17	7h	2018-05-19	6h			1	Atherurus_africanus	Mammalia	Rodentia	Hystricidae	LC	Class C	1.93	Piège	Adulte	Boucané		Consommation propre	domestic
7	2018-05-26	5	4	80		51	2018-05-23	8h	2018-05-25	11h	2018-05-24	Soir	1	Atherurus_africanus	Mammalia	Rodentia	Hystricidae	LC	Class C	1.93	Piège	Adulte	Boucané		Vendu	selling	Revendeur/euse
7	2018-06-12	6	4	80		33	2018-06-11	6h	2018-06-12	15h	2018-06-12	nuit	1	Atherurus_africanus	Mammalia	Rodentia	Hystricidae	LC	Class C	1.93	Piège	Adulte	Frais		Vendu	selling	Revendeur/euse
7	2018-06-12	6	4	80		33	2018-06-11	6h	2018-06-12	15h	2018-06-12	nuit	1	Bitis_gabonica	Reptilia	Squamata	Viperidae	LC	Class C	3.5	Piège	Adulte	Frais		Vendu	selling	Revendeur/euse
7	2018-05-19	5	4	80		47	2018-05-17	7h	2018-05-19	6h			1	Cephalophus_callipygus	Mammalia	Artiodactyla	Bovidae	LC	Class B	18.25	Piège	Adulte	Boucané		Vendu	selling	Passant
7	2018-06-09	6	4	80		16	2018-06-09	6h	2018-06-09	22h	2018-06-09	nuit	1	Cephalophus_callipygus	Mammalia	Artiodactyla	Bovidae	LC	Class B	18.25	Fusil	Adulte	Frais		Vendu	selling	Revendeur/euse
7	2018-06-15	6	4	80		9	2018-06-15	6h	2018-06-15	15h	2018-06-15	Soir	1	Cephalophus_callipygus	Mammalia	Artiodactyla	Bovidae	LC	Class B	18.25	Piège	Adulte	Frais		Vendu	selling	Revendeur/euse
7	2018-07-07	7	4	80		7	2018-07-07	5h	2018-07-07	12h	2018-07-07	matin	1	Cephalophus_callipygus	Mammalia	Artiodactyla	Bovidae	LC	Class B	18.25	Piège	Adulte	Frais		À vendre	selling
7	2018-05-14	5	4	80		40	2018-05-13	5h	2018-05-14	21h	2018-05-13	Soir	1	Cephalophus_dorsalis	Mammalia	Artiodactyla	Bovidae	NT	Class B	20	Piège	Adulte	Boucané		À vendre	selling	Passant
7	2018-06-21	6	4	80		9	2018-06-21	7h	2018-06-21	16h	2018-06-21	soir	1	Cephalophus_dorsalis	Mammalia	Artiodactyla	Bovidae	NT	Class B	20	Piège	Adulte	Décomposé		Consommation propre	domestic
7	2018-03-06	3	4	80		13	2018-03-06	20h	2018-03-07	9h			1	Cephalophus_spp.	Mammalia	Artiodactyla	Bovidae	various	Class B	16.21	Fusil	Adulte	Frais		Vendu	selling	Revendeur/euse
7	2018-03-11	3	4	80		45	2018-03-09	7h	2018-03-11	4h	2018-03-09	19h	1	Cephalophus_spp.	Mammalia	Artiodactyla	Bovidae	various	Class B	16.21	Piège	Adulte	Frais		Consommation propre et Vendu	both
7	2018-03-13	3	4	80		12	2018-03-12	23h	2018-03-13	11h	2018-03-12	23h	1	Cephalophus_spp.	Mammalia	Artiodactyla	Bovidae	various	Class B	16.21	Fusil	Adulte	Frais		Consommation propre et vendu	both	Revendeur/euse
7	2018-03-28	3	4	80		15	2018-03-27	20h	2018-03-28	11h	2018-03-27	23h	1	Cephalophus_spp.	Mammalia	Artiodactyla	Bovidae	various	Class B	16.21	Fusil	Adulte	Frais		Consommation propre et Vendu	both	Revendeur/euse
7	2018-07-07	7	4	80		7	2018-07-07	5h	2018-07-07	12h	2018-07-07	matin	1	Cercopithecus_nictitans	Mammalia	Primates	Cercopithecidae	NT	Class C	5.41	Fusil	Adulte	Frais		À vendre	selling
7	2018-06-16	6	4	80		8	2018-06-16	6h	2018-06-16	14h	2018-06-16	Matin	1	Civettictis_civetta	Mammalia	Carnivora	Herpestidae	LC	Class B	12	Piège	Adulte	Frais		Consommation propre	domestic
7	2018-03-27	3	4	80		3	2018-03-27	8h	2018-03-27	11h	2018-03-27	9h	1	Cricetomys_emini	Mammalia	Rodentia	Nesomyidae	LC	CLass C	1.3	Piège	Adulte	Frais		Consommation propre	domestic
7	2018-06-10	6	4	80		5	2018-06-10	5h	2018-06-10	10h	2018-06-10	Matin	1	Cricetomys_emini	Mammalia	Rodentia	Nesomyidae	LC	CLass C	1.3	Piège	Adulte	Frais		Consommation propre	domestic
7	2018-06-24	6	4	80		6	2018-06-24	8h	2018-06-24	14h	2018-06-24	matin	1	Cricetomys_emini	Mammalia	Rodentia	Nesomyidae	LC	CLass C	1.3	Piège	Adulte	Frais		Consommation propre	domestic
7	2018-07-07	7	4	80		7	2018-07-07	5h	2018-07-07	12h	2018-07-07	matin	1	Crossarchus_obscurus	Mammalia	Carnivora	Herpestidae	LC		1.25
7	2018-05-26	5	4	80		51	2018-05-23	8h	2018-05-25	11h	2018-05-24	Soir	1	Hyemoschus_aquaticus	Mammalia	Artiodactyla	Tragulidae	LC	Class C	10.85	Piège	Adulte	Boucané		Vendu	selling	Revendeur/euse
7	2018-03-28	3	4	80		15	2018-03-27	20h	2018-03-28	11h	2018-03-28	2h	1	Kinixys_erosa	Reptilia	Testudines	Testudinidae	DD	Class B	1.5	Autre	Adulte	Vivant		Consommation propre	domestic
7	2018-06-12	6	4	80		33	2018-06-11	6h	2018-06-12	15h	2018-06-12	nuit	1	Kinixys_erosa	Reptilia	Testudines	Testudinidae	DD	Class B	1.5	Autre	Adulte	Vivant		Consommation propre	domestic
7	2018-06-15	6	4	80		9	2018-06-15	6h	2018-06-15	15h	2018-06-15	Soir	1	Kinixys_erosa	Reptilia	Testudines	Testudinidae	DD	Class B	1.5	Piège	Adulte	Frais		Consommation propre	domestic
7	2018-06-18	6	4	80		7	2018-06-18	7h	2018-06-18	14h	2018-06-18	Matin	1	Lophocebus_albigena	Mammalia	Primates	Cercopithecidae	LC	Class C	7.69	Fusil	Adulte	Frais		Vendu	selling	Revendeur/euse
7	2018-03-19	3	4	80		15	2018-03-18	19h	2018-03-19	10h	2018-03-19	3h	1	Nandinia_binotata	Mammalia	Carnivora	Nandiniidae	LC	Class C	2	Piège	Adulte	Frais		Vendu	selling	Revendeur/euse
7	2018-04-07	4	4	80		28	2018-04-05	15h	2018-04-06	19h	2018-04-06	2h	1	Nandinia_binotata	Mammalia	Carnivora	Nandiniidae	LC	Class C	2	Fusil	Adulte	Frais		Vendu	selling	Revendeur/euse
7	2018-06-09	6	4	80		16	2018-06-09	6h	2018-06-09	22h	2018-06-09	nuit	1	Nandinia_binotata	Mammalia	Carnivora	Nandiniidae	LC	Class C	2	Fusil	Adulte	Frais		Vendu	selling	Revendeur/euse
7	2018-06-25	6	4	80			2018-06-25		2018-06-25		2018-06-25	Matin	1	Nandinia_binotata	Mammalia	Carnivora	Nandiniidae	LC	Class C	2	Piège	Adulte	Frais		Vendu	selling	Revendeur/euse
7	2018-06-10	6	4	80		5	2018-06-10	5h	2018-06-10	10h	2018-06-10	Matin	1	Phataginus_spp.	Mammalia	Pholidota	Manidae	VU/EN	Class C	2.425	Piège	Adulte	Frais		Vendu	selling	Revendeur/euse
7	2018-03-06	3	4	80		13	2018-03-06	20h	2018-03-07	9h			1	Philantomba_monticola	Mammalia	Artiodactyla	Bovidae	LC	Class C	6.25	Fusil		Frais		?	unknown	?
7	2018-03-06	3	4	80		13	2018-03-06	20h	2018-03-07	9h			1	Philantomba_monticola	Mammalia	Artiodactyla	Bovidae	LC	Class C	6.25					?	unknown	?
7	2018-03-06	3	4	80		13	2018-03-06	20h	2018-03-07	9h			1	Philantomba_monticola	Mammalia	Artiodactyla	Bovidae	LC	Class C	6.25					?	unknown	?
7	2018-03-11	3	4	80		45	2018-03-09	7h	2018-03-11	4h	2018-03-09	21h	1	Philantomba_monticola	Mammalia	Artiodactyla	Bovidae	LC	Class C	6.25	Piège	Adulte	Frais		Vendu	selling
7	2018-03-11	3	4	80		45	2018-03-09	7h	2018-03-11	4h	2018-03-10	3h	1	Philantomba_monticola	Mammalia	Artiodactyla	Bovidae	LC	Class C	6.25	Piège	Adulte	Frais		Vendu	selling
7	2018-03-13	3	4	80		12	2018-03-12	23h	2018-03-13	11h	2018-03-13	2h	1	Philantomba_monticola	Mammalia	Artiodactyla	Bovidae	LC	Class C	6.25	Fusil	Adulte	Frais		Vendu	selling	Voisin
7	2018-03-24	3	4	80		22	2018-03-23	12h	2018-03-24	10h	2018-03-23	20h	1	Philantomba_monticola	Mammalia	Artiodactyla	Bovidae	LC	Class C	6.25	Fusil	Adulte	Frais		Consommation propre	domestic
7	2018-03-28	3	4	80		15	2018-03-27	20h	2018-03-28	11h	2018-03-27	21h	1	Philantomba_monticola	Mammalia	Artiodactyla	Bovidae	LC	Class C	6.25	Fusil	Adulte	Frais		Vendu	selling	Voisin
7	2018-04-07	4	4	80		28	2018-04-05	15h	2018-04-06	19h	2018-04-05	20h	1	Philantomba_monticola	Mammalia	Artiodactyla	Bovidae	LC	Class C	6.25	Fusil	Jeune	Frais		Consommation propre	domestic
7	2018-04-09	4	4	80		12	2018-04-08	21h	2018-04-09	9h	2018-04-08	23h	1	Philantomba_monticola	Mammalia	Artiodactyla	Bovidae	LC	Class C	6.25	Fusil	Adulte	Frais		À vendre	selling	Revendeur/euse
7	2018-04-09	4	4	80		12	2018-04-08	21h	2018-04-09	9h	2018-04-09	13h	1	Philantomba_monticola	Mammalia	Artiodactyla	Bovidae	LC	Class C	6.25	Fusil	Adulte			À vendre	selling	Voisin
7	2018-04-15	4	4	80		23	2018-04-14	11h	2018-04-15	10h	2018-04-14	22h	1	Philantomba_monticola	Mammalia	Artiodactyla	Bovidae	LC	Class C	6.25	Fusil	Adulte	Frais		À vendre	selling
7	2018-04-17	4	4	80		5	2018-04-16	23h	2018-04-17	4h	2018-04-17	00h	1	Philantomba_monticola	Mammalia	Artiodactyla	Bovidae	LC	Class C	6.25	Fusil	Adulte	Frais		Vendu	selling	Revendeur/euse
7	2018-04-17	4	4	80		5	2018-04-16	23h	2018-04-17	4h	2018-04-17	2h	1	Philantomba_monticola	Mammalia	Artiodactyla	Bovidae	LC	Class C	6.25	Fusil	Adulte	Frais		Vendu	selling	Revendeur/euse
7	2018-04-22	4	4	80		7	2018-04-22	9h	2018-04-22	16h	2018-04-22	12h	1	Philantomba_monticola	Mammalia	Artiodactyla	Bovidae	LC	Class C	6.25	Piège	Adulte	Frais		À vendre	selling	Passant
7	2018-04-22	4	4	80		7	2018-04-22	9h	2018-04-22	16h	2018-04-22	11h	1	Philantomba_monticola	Mammalia	Artiodactyla	Bovidae	LC	Class C	6.25	Piège	Adulte	Frais		À vendre	selling	Passant
7	2018-04-26	4	4	80		57	2018-04-24	6h	2018-04-26	15h			1	Philantomba_monticola	Mammalia	Artiodactyla	Bovidae	LC	Class C	6.25
7	2018-05-10	5	4	80		52	2018-05-09	8h	2018-05-11	12h			1	Philantomba_monticola	Mammalia	Artiodactyla	Bovidae	LC	Class C	6.25	Piège	Adulte	Frais		Vendu	selling
7	2018-05-26	5	4	80		51	2018-05-23	8h	2018-05-25	11h	2018-05-24	Soir	1	Philantomba_monticola	Mammalia	Artiodactyla	Bovidae	LC	Class C	6.25	Piège	Adulte	Boucané		Consommation propre	domestic
7	2018-06-09	6	4	80		16	2018-06-09	6h	2018-06-09	22h	2018-06-09	Matin	1	Philantomba_monticola	Mammalia	Artiodactyla	Bovidae	LC	Class C	6.25	Piège	Adulte	Frais		Consommation propre	domestic
7	2018-06-09	6	4	80		16	2018-06-09	6h	2018-06-09	22h	2018-06-09	nuit	1	Philantomba_monticola	Mammalia	Artiodactyla	Bovidae	LC	Class C	6.25	Fusil	Adulte	Frais		Vendu	selling	Revendeur/euse
7	2018-04-26	4	4	80		57	2018-04-24	6h	2018-04-26	15h			1	Potamochoerus_porcus	Mammalia	Artiodactyla	Suidae	LC	Class B	70
7	2018-06-03	6	4	80		39	2018-06-02	5h	2018-06-03	20h	2018-06-02	nuit	1	Potamochoerus_porcus	Mammalia	Artiodactyla	Suidae	LC	Class B	70	Piège	Jeune	Frais		Consommation propre et Vendu	both	Revendeur/euse
7	2018-03-27	3	4	80		3	2018-03-27	8h	2018-03-27	11h	2018-03-27	9h	1	Thryonomys_swinderianus	Mammalia	Rodentia	Thryonomyidae	LC	Class C	4.06	Piège	Adulte	Décomposé		Consommation propre	domestic
7	2018-03-06	3	4	80		13	2018-03-06	20h	2018-03-07	9h			1	unspecified_monkey	Mammalia	Primates	unspecified_primates				Fusil	Adulte	Frais		Consommation propre	domestic
7	2018-03-06	3	4	80		13	2018-03-06	20h	2018-03-07	9h			1	unspecified_monkey	Mammalia	Primates	unspecified_primates
7	2018-03-11	3	4	80		45	2018-03-09	7h	2018-03-11	4h	2018-03-10	11h	1	unspecified_monkey	Mammalia	Primates	unspecified_primates				Piège	Jeune	Frais		Consommation propre	domestic
7	2018-03-24	3	4	80		22	2018-03-23	12h	2018-03-24	10h	2018-03-24	7h	1	unspecified_monkey	Mammalia	Primates	unspecified_primates				Fusil	Adulte	Frais		Vendu	selling	Revendeur/euse
7	2018-04-07	4	4	80		28	2018-04-05	15h	2018-04-06	19h	2018-04-06	17h	1	unspecified_monkey	Mammalia	Primates	unspecified_primates				Fusil	Adulte	Frais		Vendu	selling	Revendeur/euse
7	2018-04-09	4	4	80		12	2018-04-08	21h	2018-04-09	9h	2018-04-09	19h	1	unspecified_monkey	Mammalia	Primates	unspecified_primates				Fusil	Adulte	Frais		Vendu	selling	Revendeur/euse
7	2018-04-15	4	4	80		23	2018-04-14	11h	2018-04-15	10h	2018-04-15	8h	1	unspecified_monkey	Mammalia	Primates	unspecified_primates				Fusil	Adulte	Frais		À vendre	selling
7	2018-03-24	3	4	80		22	2018-03-23	12h	2018-03-24	10h	2018-03-23	16h	1	Varanus_ornatus	Reptilia	Squamata	Varanidae	VU	Class B	5	Fusil	Adulte	Frais		Vendu	selling	Revendeur/euse
7	2018-07-20	7	4	80		8	2018-07-20	6h	2018-07-20	14h			-1
7	2018-03-18	3	4	80									-1
7	2018-04-05	4	4	80									-1
7	2018-04-14	4	4	80									-1
7	2018-04-24	4	4	80									-1
7	2018-05-13	5	4	80									-1
7	2018-05-17	5	4	80									-1
7	2018-05-18	5	4	80									-1
7	2018-05-23	5	4	80									-1
7	2018-05-25	5	4	80									-1
7	2018-05-29	5	4	80			2018-05-29						-1
7	2018-05-30	5	4	80		27	2018-05-29	9h	2018-05-30	12h			-1
7	2018-06-02	6	4	80									-1
3	2018-11-01		5	81		5.5	2018-11-01	10	2018-11-01	15h30	2018-11-01		1	Atherurus_africanus	Mammalia	Rodentia	Hystricidae	LC	Class C	1.93	Piège	Adulte		Feménin	À vendre	selling
3	2018-11-22		5	81		8	2018-11-22	7h30	2018-11-22	15h40	2018-11-22		1	Cephalophus_callipygus	Mammalia	Artiodactyla	Bovidae	LC	Class B	18.25	Piège	Adulte	Frais	Masculin	Consommation propre et Vendu	both	Passant
3	2018-12-04		5	81		8.5	2018-12-04	7	2018-12-04	15h30	2018-12-04	matin	1	Cephalophus_callipygus	Mammalia	Artiodactyla	Bovidae	LC	Class B	18.25	Piège	Adulte	Frais	Masculin	Consommation propre et Vendu	both	Passant
3	2018-12-14		5	81		8	2018-12-14	8h30	2018-12-14	16h30	2018-12-14	matin	1	Cephalophus_callipygus	Mammalia	Artiodactyla	Bovidae	LC	Class B	18.25	Piège	Adulte	Frais	Feménin	Consommation propre et Vendu	both
3	2018-12-18		5	81		8	2018-12-18	7h30	2018-12-18	15h30	2018-12-18	jour	1	Cephalophus_callipygus	Mammalia	Artiodactyla	Bovidae	LC	Class B	18.25	Piège	Adulte	Frais	Feménin	Consommation propre et Vendu	both	Passant
3	2018-12-21		5	81		8	2018-12-21	8h30	2018-12-21	16h30	2018-12-21	matin	1	Cephalophus_callipygus	Mammalia	Artiodactyla	Bovidae	LC	Class B	18.25	Piège	Adulte	Frais	Masculin	Consommation propre et Vendu	both
3	2018-10-25		5	81		8	2018-10-25	6h30	2018-10-25	14h30	2018-10-25	soir	1	Cephalophus_dorsalis	Mammalia	Artiodactyla	Bovidae	NT	Class B	20	Piège	Jeune		Masculin	Consommation propre	domestic
3	2018-11-02		5	81		9	2018-11-02	7	2018-11-02	16	2018-11-02	soir	1	Cephalophus_dorsalis	Mammalia	Artiodactyla	Bovidae	NT	Class B	20	Piège	Adulte	Frais	Feménin	Consommation propre et à vendre	both
3	2018-11-05		5	81		5	2018-11-05	9h30	2018-11-05	14h30	2018-11-05	jour	1	Cephalophus_dorsalis	Mammalia	Artiodactyla	Bovidae	NT	Class B	20	Piège	Adulte	Frais	Feménin	Consommation propre et à vendre	both
3	2018-11-13		5	81		6.5	2018-11-13	7h30	2018-11-13	14	2018-11-13		1	Cephalophus_dorsalis	Mammalia	Artiodactyla	Bovidae	NT	Class B	20	Piège	Adulte	Frais	Feménin	Consommation propre et Vendu	both	Voisin
3	2018-11-24		5	81		6	2018-11-24	9h30	2018-11-24	15h30	2018-11-24		1	Cephalophus_dorsalis	Mammalia	Artiodactyla	Bovidae	NT	Class B	20	Piège	Jeune	Frais	Feménin	Consommation propre et Vendu	both	Voisin
3	2018-12-24		5	81		9	2018-12-24	7h30	2018-12-24	16h30	2018-12-24	jour	1	Cephalophus_dorsalis	Mammalia	Artiodactyla	Bovidae	NT	Class B	20	Piège	Adulte	Frais	Masculin	Consommation propre et Vendu	both
3	2018-12-28		5	81		8.5	2018-12-28	7h	2018-12-28	15h20	28/2018	matin	1	Cephalophus_dorsalis	Mammalia	Artiodactyla	Bovidae	NT	Class B	20	Piège	Adulte	Frais	Masculin	Consommation propre et Vendu	both	Voisin
3	2019-01-12		5	81		8	2019-01-12	7h	2019-01-12	15h0	2019-01-12	jour	1	Cephalophus_dorsalis	Mammalia	Artiodactyla	Bovidae	NT	Class B	20	Piège	Adulte	Frais	Masculin	Consommation propre et Vendu	both
3	2019-01-18		5	81		8	2019-01-18	9h30	2019-01-18	17h30	2019-01-18	soir	1	Cephalophus_dorsalis	Mammalia	Artiodactyla	Bovidae	NT	Class B	20	Piège	Jeune	Frais	Masculin	Consommation propre et Vendu	both	Passant
3	2019-01-20		5	81		8	2019-01-20	8h40	2019-01-20	16h30	2019-01-20	matin	1	Cephalophus_dorsalis	Mammalia	Artiodactyla	Bovidae	NT	Class B	20	Piège	Adulte	Frais	Masculin	Consommation propre et Vendu	both	Passant
3	2019-02-12		5	81		7.5	2019-02-12	09:15:00	2019-02-12	16:40:00		matin	1	Cephalophus_dorsalis	Mammalia	Artiodactyla	Bovidae	NT	Class B	20	Piège	Adulte	Frais	Masculin	Consommation propre	domestic	Passant
3	2018-11-15		5	81		9	2018-11-15	7h30	2018-11-15	16h40	2018-11-15		1	Cephalophus_nigrifrons	Mammalia	Artiodactyla	Bovidae	LC	Class C	13.9	Piège	Adulte	Frais	Feménin	Consommation propre et Vendu	both	Passant
3	2018-11-29		5	81		7	2018-11-29	7h30	2018-11-29	14h30	2018-11-29	matin	1	Cephalophus_nigrifrons	Mammalia	Artiodactyla	Bovidae	LC	Class C	13.9	Piège	Adulte	Frais	Feménin	Consommation propre et Vendu	both	Passant
3	2019-01-23		5	81		8	2019-01-23	8h30	2019-01-23	16h30	2019-01-23	soir	1	Cephalophus_nigrifrons	Mammalia	Artiodactyla	Bovidae	LC	Class C	13.9	Piège	Adulte	Frais	Feménin	Consommation propre et Vendu	both	Voisin
3	2019-02-21		5	81		8	2019-02-21	08:40:00	2019-02-21	16:30:00		matin	1	Cephalophus_nigrifrons	Mammalia	Artiodactyla	Bovidae	LC	Class C	13.9	Piège	Adulte	Frais	Masculin	Consommation propre et Vendu	both	Passant
3	2018-11-16		5	81		7	2018-11-16	9h30	2018-11-16	16h30	2018-11-16		1	Herpestes_naso	Mammalia	Carnivora	Herpestidae	LC	Class C	2.9	Piège	Adulte	Frais	Masculin	Consommation propre	domestic
3	2018-12-03		5	81		8.5	2018-12-03	7	2018-12-03	15h30	2018-12-03	matin	1	Herpestes_naso	Mammalia	Carnivora	Herpestidae	LC	Class C	2.9	Piège	Adulte	Frais	Feménin	Vendu	selling	Passant
3	2018-11-12		5	81		6.5	2018-11-12	9h30	2018-11-12	16	2018-11-12		1	Philantomba_monticola	Mammalia	Artiodactyla	Bovidae	LC	Class C	6.25	Piège	Adulte	Décomposé	Masculin	Consommation propre et Vendu	both
3	2018-10-28		5	81		7.5	2018-10-28	11h30	2018-10-28	18	2018-10-28	jour	1	Tragelaphus_spekeii	Mammalia	Artiodactyla	Bovidae	LC	Class B	78	Piège	Adulte	Frais	Masculin	Consommation propre et à vendre	both
3	2018-10-29		5	81		4.5	2018-10-29	6	2018-10-29	10h30			-1
6	2018-04-07	4	8	82		37.5	2018-04-06	6h30	2018-04-07	20h		10h	1	Atherurus_africanus	Mammalia	Rodentia	Hystricidae	LC	Class C	1.93
6	2018-04-07	4	8	82		37.5	2018-04-06	6h30	2018-04-07	20h			1	Atherurus_africanus	Mammalia	Rodentia	Hystricidae	LC	Class C	1.93
6	2018-04-14	4	8	82		12	2018-04-14	7h	2018-04-14	19h	2018-04-14	13h	1	Atherurus_africanus	Mammalia	Rodentia	Hystricidae	LC	Class C	1.93	Chien	Jeune	Vivant		Consommation propre	domestic
6	2018-04-14	4	8	82		12	2018-04-14	7h	2018-04-14	19h	2018-04-14	13h	1	Atherurus_africanus	Mammalia	Rodentia	Hystricidae	LC	Class C	1.93	Chien	Jeune	Vivant		Consommation propre	domestic
6	2018-04-19	4	8	82		76.5	2018-04-16	14h35	2018-04-19	19h		13h	1	Atherurus_africanus	Mammalia	Rodentia	Hystricidae	LC	Class C	1.93	Chien	Jeune			Consommation propre	domestic
6	2018-04-29	4	8	82		9	2018-04-29	9h	2018-04-29	18h	2018-04-29	15h	1	Atherurus_africanus	Mammalia	Rodentia	Hystricidae	LC	Class C	1.93	Chien	Jeune	Vivant		Consommation propre	domestic
6	2018-04-30	4	8	82		9	2018-04-30	9h06	2018-04-30	18h	2018-04-30	16h10	1	Atherurus_africanus	Mammalia	Rodentia	Hystricidae	LC	Class C	1.93	Chien	Jeune	Vivant		Vendu	selling	Revendeur/euse
6	2018-05-02	5	8	82		11	2018-05-02	6h15	2018-05-02	17h	2018-05-02	14h17	1	Atherurus_africanus	Mammalia	Rodentia	Hystricidae	LC	Class C	1.93	Chien	Jeune	Vivant		Consommation propre	domestic
6	2018-05-09	5	8	82		8	2018-05-09	8h	2018-05-09	16h	2018-05-09	13h	1	Atherurus_africanus	Mammalia	Rodentia	Hystricidae	LC	Class C	1.93	Chien	Jeune	Vivant		consommation propre	domestic
6	2018-05-10	5	8	82		10.5	2018-05-10	7h30	2018-05-10	18h	2018-05-10	soir	1	Atherurus_africanus	Mammalia	Rodentia	Hystricidae	LC	Class C	1.93	Chien	Jeune	Vivant		consommation propre	domestic
6	2018-05-10	5	8	82		10.5	2018-05-10	7h30	2018-05-10	18h	2018-05-10	soir	1	Atherurus_africanus	Mammalia	Rodentia	Hystricidae	LC	Class C	1.93	Chien	Jeune	Vivant		vendu	selling
6	2018-06-02	6	8	82		12	2018-06-02	7h	2018-06-02	19h	2018-06-02	matin	1	Atherurus_africanus	Mammalia	Rodentia	Hystricidae	LC	Class C	1.93	Piège	Adulte	Frais		vendu	selling	Bantou
6	2018-06-10	6	8	82		8	2018-06-10	7h	2018-06-10	15h	2018-06-10	matin	1	Atherurus_africanus	Mammalia	Rodentia	Hystricidae	LC	Class C	1.93	Chien	Adulte	Frais		Consommation propre	domestic
6	2018-06-12	6	8	82		10	2018-06-12	8h	2018-06-12	18h	2018-06-12	soir	1	Atherurus_africanus	Mammalia	Rodentia	Hystricidae	LC	Class C	1.93	Chien	Adulte	Frais		Consommation propre	domestic
6	2018-06-20	6	8	82		8	2018-06-20	8h	2018-06-20	16h	2018-06-20	Soir	1	Atherurus_africanus	Mammalia	Rodentia	Hystricidae	LC	Class C	1.93	Chien	Adulte	Frais		Consommation propre	domestic
6	2018-06-23	6	8	82		12	2018-06-23	6h	2018-06-23	18h	2018-06-23	Soir	1	Atherurus_africanus	Mammalia	Rodentia	Hystricidae	LC	Class C	1.93	Chien	Adulte	Frais		Consommation propre	domestic
6	2018-06-29	6	8	82		9	2018-06-29	6h	2018-06-29	15h	2018-06-29	Soir	1	Atherurus_africanus	Mammalia	Rodentia	Hystricidae	LC	Class C	1.93	Chien	Adulte			Consommation propre	domestic
6	2018-05-27	5	8	82		9.5	2018-05-27	6h	2018-05-27	15h30	2018-05-27	soir	1	Bdeogale_nigripes	Mammalia	Carnivora	Herpestidae	LC	Class C	2.5	Chien	Adulte	frais		Consommation propre	domestic
6	2018-05-24	5	8	82		7	2018-05-24	11h	2018-05-24	18h	2018-05-24	matin	1	Cephalophus_callipygus	Mammalia	Artiodactyla	Bovidae	LC	Class B	18.25	Piège	Jeune	Vivant		Consommation propre et Vendu	both	Bantou
6	2018-06-02	6	8	82		12	2018-06-02	7h	2018-06-02	19h	2018-06-03	matin	1	Cephalophus_callipygus	Mammalia	Artiodactyla	Bovidae	LC	Class B	18.25	Piège	Jeune	Frais		vendu	selling	Bantou
6	2018-06-08	6	8	82		12	2018-06-08	7h	2018-06-08	19h	2018-06-08	soir	1	Cephalophus_callipygus	Mammalia	Artiodactyla	Bovidae	LC	Class B	18.25	Piège	Adulte	Frais		Consommation propre et Vendu	both	Voisin
6	2018-06-17	6	8	82		13	2018-06-17	6h	2018-06-17	19h	2018-06-17	soir	1	Cephalophus_callipygus	Mammalia	Artiodactyla	Bovidae	LC	Class B	18.25	Piège	Adulte	Frais		Consommation propre	domestic
6	2018-05-19	5	8	82		10.5	2018-05-19	7h30	2018-05-19	18h	2018-05-19	soir	1	Phataginus_spp.	Mammalia	Pholidota	Manidae	VU/EN	Class C	2.425	Piège	Adulte	Frais		consommation propre	domestic
6	2018-06-02	6	8	82		12	2018-06-02	7h	2018-06-02	19h	2018-06-02	matin	1	Phataginus_spp.	Mammalia	Pholidota	Manidae	VU/EN	Class C	2.425	Piège	Adulte	Vivant		consommation propre	domestic
6	2018-04-07	4	8	82		37.5	2018-04-06	6h30	2018-04-07	20h			1	Philantomba_monticola	Mammalia	Artiodactyla	Bovidae	LC	Class C	6.25
6	2018-04-19	4	8	82		76.5	2018-04-16	14h35	2018-04-19	19h		7h	1	Philantomba_monticola	Mammalia	Artiodactyla	Bovidae	LC	Class C	6.25	Piège	Jeune	Boucané		Consommation propre	domestic
6	2018-04-28	4	8	82		11	2018-04-28	7h	2018-04-28	18h	2018-04-28	10h45	1	Philantomba_monticola	Mammalia	Artiodactyla	Bovidae	LC	Class C	6.25	Chien	Jeune	Vivant		Consommation propre	domestic
6	2018-04-30	4	8	82		9	2018-04-30	9h06	2018-04-30	18h	2018-04-30	12h	1	Philantomba_monticola	Mammalia	Artiodactyla	Bovidae	LC	Class C	6.25	Piège	Jeune	Décomposé		Consommation propre	domestic
6	2018-05-19	5	8	82		10.5	2018-05-19	7h30	2018-05-19	18h	2018-05-19	matin	1	Philantomba_monticola	Mammalia	Artiodactyla	Bovidae	LC	Class C	6.25	Piège	Adulte	Frais		vendu	selling	Bantou
6	2018-07-07	7	8	82		11	2018-07-07	7h	2018-07-07	18h	2018-07-07	matin	1	Philantomba_monticola	Mammalia	Artiodactyla	Bovidae	LC	Class C	6.25	Piège	Adulte	Décomposé		Consommation propre	domestic
6	2018-03-17	3	8	82		7	2018-03-17	9h53	2018-03-17	17h	2018-03-17	15h	1	Tragelaphus_spekeii	Mammalia	Artiodactyla	Bovidae	LC	Class B	78	Chien	Jeune	Frais		Vendu	selling	Voisin
6	2018-04-06	4	8	82									-1
6	2018-04-16	4	8	82									-1
6	2018-04-17	4	8	82									-1
6	2018-04-18	4	8	82									-1
6	2018-05-31	5	16	83		7.5	2018-05-31	7h30	2018-05-31	15h	2018-05-31		1	Atherurus_africanus	Mammalia	Rodentia	Hystricidae	LC	Class C	1.93	Chien	Adulte	frais		Consommation propre	domestic
6	2018-05-02	5	16	83		12.5	2018-05-02	6h	2018-05-02	18h30	2018-05-02	9h	1	Cercopithecus_nictitans	Mammalia	Primates	Cercopithecidae	NT	Class C	5.41	Fusil	Jeune			Consommation propre	domestic
6	2018-04-25	4	16	83		5	2018-04-25	6h	2018-04-25	11h	2018-04-25	9h	1	Cricetomys_emini	Mammalia	Rodentia	Nesomyidae	LC	CLass C	1.3	Piège	Jeune			Consommation propre	domestic
6	2018-04-23	4	16	83		11	2018-04-23	6h	2018-04-23	17h	2018-04-23		1	Philantomba_monticola	Mammalia	Artiodactyla	Bovidae	LC	Class C	6.25	Piège	Jeune	Vivant		Vendu	selling	Passant
6	2018-04-24	4	16	83		10	2018-04-24	7h10	2018-04-24	17h06	2018-04-24	11h50	1	Philantomba_monticola	Mammalia	Artiodactyla	Bovidae	LC	Class C	6.25	Piège	Adulte	Vivant		Vendu	selling	Bantou
6	2018-04-30	4	16	83		10.5	2018-04-30	7h45	2018-04-30	18h05			1	Philantomba_monticola	Mammalia	Artiodactyla	Bovidae	LC	Class C	6.25	Piège	Jeune	Décomposé		Consommation propre	domestic
10	2018-11-08		11	84			2018-11-08	8	2018-11-07	9h	2018-11-08	matin	1	Atherurus_africanus	Mammalia	Rodentia	Hystricidae	LC	Class C	1.93	Piège	Adulte	Frais	Feménin	Consommation propre	domestic
10	2018-11-18		11	84		9	2018-11-18	8	2018-11-18	17	2018-11-18	matin	1	Cephalophus_callipygus	Mammalia	Artiodactyla	Bovidae	LC	Class B	18.25	Autre	Adulte	Frais	Feménin	Vendu	selling
10	2018-11-29		11	84		8	2018-11-29	8	2018-11-29	16	2018-11-29	matin	1	Ceratogymna_atrata	Aves	Bucerotiformes	Bucerotidae	LC	Class C	1.348	Fusil	Adulte	Frais	Masculin	Consommation propre	domestic
10	2018-11-08		11	84			2018-11-08	8	2018-11-07	9h	2018-11-08	matin	1	Cricetomys_emini	Mammalia	Rodentia	Nesomyidae	LC	Class C	1.3	Piège	Adulte	Frais	Masculin	Consommation propre	domestic
10	2018-12-09		11	84		6	2018-12-09	8	2018-12-09	14	2018-12-09	matin	1	Cricetomys_emini	Mammalia	Rodentia	Nesomyidae	LC	Class C	1.3	Autre	Adulte	Frais	Feménin	Consommation propre	domestic
10	2018-11-08		11	84			2018-11-08	8	2018-11-07	9h	2018-11-08	nuit	1	Nandinia_binotata	Mammalia	Carnivora	Nandiniidae	LC	Class C	2	Fusil	Adulte	Frais	Feménin	Consommation propre	domestic
10	2018-11-29		11	84		8	2018-11-29	8	2018-11-29	16	2018-11-29	matin	1	Philantomba_monticola	Mammalia	Artiodactyla	Bovidae	LC	Class C	6.25	Piège	Adulte	Frais	Feménin	Vendu	selling
[truncated: 1,275 more rows]

## Sheet: trips
ID	HUNTING_EFFORT_h	start_DATE	tracks	Doubtful_offtake_info	Number_of_carcasses	rien	Cephalophus_callipygus	Cephalophus_dorsalis	Cephalophus_leucogaster	Cephalophus_nigrifrons	Cephalophus_silvicultor	Cephalophus_spp	Neotragus_batesi	Philantomba_monticola	Tragelaphus_spekeii	Potamochoerus_porcus	Hyemoschus_aquaticus	Caracal_aurata	Atilax_paludinosus	Bdeogale_nigripes	Civettictis_civetta	Crossarchus_obscurus	Genetta_servalina	Herpestes_naso	unspecified_mongoose	Aonyx_congicus	Nandinia_binotata	Dendrohyrax_dorsalis	Phataginus_spp	Smutsia_gigantea	Cercocebus_agilis	Cercopithecus_cephus	Cercopithecus_neglectus	Cercopithecus_nictitans	Cercopithecus_pogonias	Colobus_guereza	Lophocebus_albigena	Mandrillus_sphinx	Pan_troglodytes	Perodicticus_edwardsi	unspecified_monkey	Atherurus_africanus	Cricetomys_emini	unspecified_squirrel	Thryonomys_swinderianus	Osteolaemus_tetraspis	Dendroaspis_jamesoni	Naja_nigricollis	Varanus_ornatus
1	11	2018-03-12		0	0	1	0	0	0	0	0	0	0	0	0	0	0	0	0	0	0	0	0	0	0	0	0	0	0	0	0	0	0	0	0	0	0	0	0	0	0	0	0	0	0	0	0	0	0
1	7	2018-06-01		0	1	0	0	0	0	0	0	0	0	0	0	0	0	0	0	0	0	0	0	0	0	0	0	0	0	0	0	0	0	1	0	0	0	0	0	0	0	0	0	0	0	0	0	0	0
1	8	2018-06-16		0	1	0	0	0	0	0	0	0	0	0	0	0	0	0	0	0	0	0	0	0	0	0	0	0	0	0	0	0	0	0	0	0	0	0	0	0	0	1	0	0	0	0	0	0	0
2	55	2018-03-07		0	5	0	0	0	0	0	0	0	0	0	0	0	0	0	0	0	0	0	0	0	0	0	0	0	0	0	0	0	0	0	0	0	0	0	0	0	4	0	0	0	0	0	0	0	0
2	8	2018-03-11		0	0	1	0	0	0	0	0	0	0	0	0	0	0	0	0	0	0	0	0	0	0	0	0	0	0	0	0	0	0	0	0	0	0	0	0	0	0	0	0	0	0	0	0	0	0
2	53	2018-03-20		0	2	0	0	0	0	0	0	0	0	1	0	0	0	0	0	0	0	0	0	0	0	0	0	0	0	0	0	0	0	0	0	0	0	0	0	0	1	0	0	0	0	0	0	0	0
2	7	2018-03-24		0	0	1	0	0	0	0	0	0	0	0	0	0	0	0	0	0	0	0	0	0	0	0	0	0	0	0	0	0	0	0	0	0	0	0	0	0	0	0	0	0	0	0	0	0	0
2	8	2018-03-27		0	1	0	0	0	0	0	0	1	0	0	0	0	0	0	0	0	0	0	0	0	0	0	0	0	0	0	0	0	0	0	0	0	0	0	0	0	0	0	0	0	0	0	0	0	0
2	6	2018-03-30		0	1	0	0	0	0	0	0	0	0	1	0	0	0	0	0	0	0	0	0	0	0	0	0	0	0	0	0	0	0	0	0	0	0	0	0	0	0	0	0	0	0	0	0	0	0
2		2018-04-06		0	0	1	0	0	0	0	0	0	0	0	0	0	0	0	0	0	0	0	0	0	0	0	0	0	0	0	0	0	0	0	0	0	0	0	0	0	0	0	0	0	0	0	0	0	0
2	5	2018-04-10		0	0	1	0	0	0	0	0	0	0	0	0	0	0	0	0	0	0	0	0	0	0	0	0	0	0	0	0	0	0	0	0	0	0	0	0	0	0	0	0	0	0	0	0	0	0
2	5	2018-04-15		0	0	1	0	0	0	0	0	0	0	0	0	0	0	0	0	0	0	0	0	0	0	0	0	0	0	0	0	0	0	0	0	0	0	0	0	0	0	0	0	0	0	0	0	0	0
2	5	2018-04-16		0	1	0	0	0	0	0	0	0	0	0	0	0	0	0	0	0	0	0	0	0	0	0	0	0	0	0	0	0	0	0	0	0	0	0	0	0	0	1	0	0	0	0	0	0	0
2	4	2018-04-19		0	2	0	0	0	0	0	0	0	0	1	0	0	0	0	0	0	0	0	0	0	0	0	0	0	0	0	0	0	0	0	0	0	0	0	0	0	0	1	0	0	0	0	0	0	0
2	4	2018-04-23		0	0	1	0	0	0	0	0	0	0	0	0	0	0	0	0	0	0	0	0	0	0	0	0	0	0	0	0	0	0	0	0	0	0	0	0	0	0	0	0	0	0	0	0	0	0
2	3.5	2018-04-25		0	0	1	0	0	0	0	0	0	0	0	0	0	0	0	0	0	0	0	0	0	0	0	0	0	0	0	0	0	0	0	0	0	0	0	0	0	0	0	0	0	0	0	0	0	0
2	6	2018-04-28		0	0	1	0	0	0	0	0	0	0	0	0	0	0	0	0	0	0	0	0	0	0	0	0	0	0	0	0	0	0	0	0	0	0	0	0	0	0	0	0	0	0	0	0	0	0
2	3	2018-04-30		0	0	1	0	0	0	0	0	0	0	0	0	0	0	0	0	0	0	0	0	0	0	0	0	0	0	0	0	0	0	0	0	0	0	0	0	0	0	0	0	0	0	0	0	0	0
2	3.5	2018-05-03		0	1	0	0	0	0	0	0	0	0	0	0	0	0	0	0	0	0	0	0	0	0	0	0	0	0	0	0	0	0	0	0	0	0	0	0	0	0	1	0	0	0	0	0	0	0
2	3.5	2018-05-05		0	0	1	0	0	0	0	0	0	0	0	0	0	0	0	0	0	0	0	0	0	0	0	0	0	0	0	0	0	0	0	0	0	0	0	0	0	0	0	0	0	0	0	0	0	0
2	3	2018-05-09		0	0	1	0	0	0	0	0	0	0	0	0	0	0	0	0	0	0	0	0	0	0	0	0	0	0	0	0	0	0	0	0	0	0	0	0	0	0	0	0	0	0	0	0	0	0
2	4	2018-05-24		0	1	0	0	0	0	0	0	0	0	0	0	1	0	0	0	0	0	0	0	0	0	0	0	0	0	0	0	0	0	0	0	0	0	0	0	0	0	0	0	0	0	0	0	0	0
2	91	2018-05-26		0	9	0	0	0	0	0	0	0	0	9	0	0	0	0	0	0	0	0	0	0	0	0	0	0	0	0	0	0	0	0	0	0	0	0	0	0	0	0	0	0	0	0	0	0	0
2	3	2018-05-31		0	0	1	0	0	0	0	0	0	0	0	0	0	0	0	0	0	0	0	0	0	0	0	0	0	0	0	0	0	0	0	0	0	0	0	0	0	0	0	0	0	0	0	0	0	0
2	4	2018-06-04		0	1	0	0	0	0	0	0	0	0	0	0	1	0	0	0	0	0	0	0	0	0	0	0	0	0	0	0	0	0	0	0	0	0	0	0	0	0	0	0	0	0	0	0	0	0
2	5	2018-06-07		0	2	0	1	1	0	0	0	0	0	0	0	0	0	0	0	0	0	0	0	0	0	0	0	0	0	0	0	0	0	0	0	0	0	0	0	0	0	0	0	0	0	0	0	0	0
2	70	2018-06-11		0	0	0	0	0	0	0	0	0	0	0	0	0	0	0	0	0	0	0	0	0	0	0	0	0	0	0	0	0	0	0	0	0	0	0	0	0	0	0	0	0	0	0	0	0	0
2	5	2018-06-17		0	0	0	0	0	0	0	0	0	0	0	0	0	0	0	0	0	0	0	0	0	0	0	0	0	0	0	0	0	0	0	0	0	0	0	0	0	0	0	0	0	0	0	0	0	0
2	2	2018-06-22		0	1	0	1	0	0	0	0	0	0	0	0	0	0	0	0	0	0	0	0	0	0	0	0	0	0	0	0	0	0	0	0	0	0	0	0	0	0	0	0	0	0	0	0	0	0
2	5	2018-06-25		0	0	1	0	0	0	0	0	0	0	0	0	0	0	0	0	0	0	0	0	0	0	0	0	0	0	0	0	0	0	0	0	0	0	0	0	0	0	0	0	0	0	0	0	0	0
2	3	2018-06-30		0	0	1	0	0	0	0	0	0	0	0	0	0	0	0	0	0	0	0	0	0	0	0	0	0	0	0	0	0	0	0	0	0	0	0	0	0	0	0	0	0	0	0	0	0	0
2	3	2018-07-01		0	2	0	0	0	0	0	0	0	0	0	0	0	0	0	0	0	0	0	0	0	0	0	0	0	0	0	0	0	0	0	0	0	0	0	0	0	0	1	0	0	0	1	0	0	0
2	3	2018-07-03		0	0	1	0	0	0	0	0	0	0	0	0	0	0	0	0	0	0	0	0	0	0	0	0	0	0	0	0	0	0	0	0	0	0	0	0	0	0	0	0	0	0	0	0	0	0
2	5	2018-07-05		0	0	0	0	0	0	0	0	0	0	0	0	0	0	0	0	0	0	0	0	0	0	0	0	0	0	0	0	0	0	0	0	0	0	0	0	0	0	0	0	0	0	0	0	0	0
2	4	2018-07-07		0	0	1	0	0	0	0	0	0	0	0	0	0	0	0	0	0	0	0	0	0	0	0	0	0	0	0	0	0	0	0	0	0	0	0	0	0	0	0	0	0	0	0	0	0	0
2	3	2018-07-10		0	0	1	0	0	0	0	0	0	0	0	0	0	0	0	0	0	0	0	0	0	0	0	0	0	0	0	0	0	0	0	0	0	0	0	0	0	0	0	0	0	0	0	0	0	0
2	4	2018-07-19		0	0	1	0	0	0	0	0	0	0	0	0	0	0	0	0	0	0	0	0	0	0	0	0	0	0	0	0	0	0	0	0	0	0	0	0	0	0	0	0	0	0	0	0	0	0
6	54	2018-03-08		0	2	0	0	0	0	0	0	0	0	2	0	0	0	0	0	0	0	0	0	0	0	0	0	0	0	0	0	0	0	0	0	0	0	0	0	0	0	0	0	0	0	0	0	0	0
6	19	2018-03-13		0	3	0	0	0	0	0	0	1	0	1	0	0	0	0	0	0	0	0	0	0	0	0	0	0	0	0	0	0	0	0	0	0	0	0	0	0	0	1	0	0	0	0	0	0	0
6	15	2018-03-15		0	2	0	0	0	0	0	0	0	0	1	0	0	0	0	0	0	0	0	0	0	0	0	0	0	1	0	0	0	0	0	0	0	0	0	0	0	0	0	0	0	0	0	0	0	0
6	6	2018-03-18		0	1	0	0	0	0	0	0	0	0	0	0	0	0	0	0	0	0	0	0	0	0	0	0	0	0	0	0	0	0	0	0	0	0	0	0	0	0	0	1	0	0	0	0	0	0
6	14	2018-03-28		0	2	0	0	0	0	0	0	0	0	0	0	0	0	0	0	0	0	0	0	0	0	0	1	0	0	0	0	0	0	0	0	0	0	0	0	0	0	1	0	0	0	0	0	0	0
6	50	2018-03-31		0	4	0	0	0	0	0	0	1	0	2	0	0	0	0	0	0	0	0	0	0	0	0	0	0	1	0	0	0	0	0	0	0	0	0	0	0	0	0	0	0	0	0	0	0	0
6	1	2018-04-28		0	1	0	0	0	0	0	0	0	0	0	0	0	0	0	0	0	0	0	0	0	0	0	0	0	0	0	0	0	0	0	0	0	0	0	0	0	0	0	1	0	0	0	0	0	0
6	4	2018-05-22		0	2	0	0	0	0	0	0	0	0	0	0	0	0	0	0	0	0	0	0	0	0	0	0	0	0	0	0	1	0	1	0	0	0	0	0	0	0	0	0	0	0	0	0	0	0
6	7	2018-07-10		0	2	0	1	0	0	0	0	0	0	0	0	0	0	0	0	0	0	0	0	0	0	0	0	0	0	0	0	0	0	0	0	1	0	0	0	0	0	0	0	0	0	0	0	0	0
7	10.5	2018-04-19		0	1	0	0	0	0	0	0	0	0	1	0	0	0	0	0	0	0	0	0	0	0	0	0	0	0	0	0	0	0	0	0	0	0	0	0	0	0	0	0	0	0	0	0	0	0
7	10	2018-04-21		0	1	0	0	0	0	0	0	0	0	0	0	0	0	0	0	0	0	0	0	0	0	0	0	0	0	0	0	0	0	0	0	0	0	0	0	0	0	1	0	0	0	0	0	0	0
7	10	2018-04-22		0	1	0	0	0	0	0	0	0	0	0	0	0	0	0	0	0	0	0	0	0	0	0	0	0	0	0	0	0	0	0	0	0	0	0	0	0	0	1	0	0	0	0	0	0	0
7	11	2018-04-28		0	1	0	0	0	0	0	0	0	0	0	0	0	0	0	0	0	0	0	0	0	0	0	0	0	0	0	0	0	0	0	0	0	0	0	0	0	0	1	0	0	0	0	0	0	0
7		2018-04-30		0	0	1	0	0	0	0	0	0	0	0	0	0	0	0	0	0	0	0	0	0	0	0	0	0	0	0	0	0	0	0	0	0	0	0	0	0	0	0	0	0	0	0	0	0	0
7	7.5	2018-05-03		0	1	0	0	0	0	0	0	0	0	1	0	0	0	0	0	0	0	0	0	0	0	0	0	0	0	0	0	0	0	0	0	0	0	0	0	0	0	0	0	0	0	0	0	0	0
7	10	2018-05-08		0	1	0	0	0	0	0	0	0	0	1	0	0	0	0	0	0	0	0	0	0	0	0	0	0	0	0	0	0	0	0	0	0	0	0	0	0	0	0	0	0	0	0	0	0	0
7	10.5	2018-05-13		0	1	0	0	1	0	0	0	0	0	0	0	0	0	0	0	0	0	0	0	0	0	0	0	0	0	0	0	0	0	0	0	0	0	0	0	0	0	0	0	0	0	0	0	0	0
7	8.5	2018-05-17		0	1	0	0	0	0	0	0	0	0	0	0	0	0	0	0	0	0	0	0	0	0	0	0	0	0	0	0	0	0	0	0	0	0	0	0	0	0	1	0	0	0	0	0	0	0
7	9	2018-05-30		0	1	0	0	0	0	0	0	0	0	0	0	0	0	0	0	0	1	0	0	0	0	0	0	0	0	0	0	0	0	0	0	0	0	0	0	0	0	0	0	0	0	0	0	0	0
7	9	2018-06-07		0	1	0	0	0	0	0	0	0	0	0	0	0	0	0	0	0	0	0	0	0	0	0	0	0	0	0	0	0	0	0	0	0	0	0	0	0	0	0	0	0	0	0	0	0	1
7	3	2018-06-09		0	1	0	0	0	0	0	0	0	0	0	0	0	0	0	0	0	0	0	0	0	0	0	0	0	0	0	0	0	0	0	0	0	0	0	0	0	0	1	0	0	0	0	0	0	0
7	10	2018-06-18		0	1	0	1	0	0	0	0	0	0	0	0	0	0	0	0	0	0	0	0	0	0	0	0	0	0	0	0	0	0	0	0	0	0	0	0	0	0	0	0	0	0	0	0	0	0
7		2018-06-20		0	1	0	0	0	0	0	0	0	0	0	0	0	0	0	0	0	0	0	0	0	0	0	0	0	1	0	0	0	0	0	0	0	0	0	0	0	0	0	0	0	0	0	0	0	0
7	8	2018-06-26		0	1	0	0	1	0	0	0	0	0	0	0	0	0	0	0	0	0	0	0	0	0	0	0	0	0	0	0	0	0	0	0	0	0	0	0	0	0	0	0	0	0	0	0	0	0
7	9	2018-06-29		0	1	0	0	0	0	0	0	0	0	1	0	0	0	0	0	0	0	0	0	0	0	0	0	0	0	0	0	0	0	0	0	0	0	0	0	0	0	0	0	0	0	0	0	0	0
8	10.5	2018-03-15		0	0	1	0	0	0	0	0	0	0	0	0	0	0	0	0	0	0	0	0	0	0	0	0	0	0	0	0	0	0	0	0	0	0	0	0	0	0	0	0	0	0	0	0	0	0
8		2018-04-23		0	1	0	0	0	0	0	0	0	0	1	0	0	0	0	0	0	0	0	0	0	0	0	0	0	0	0	0	0	0	0	0	0	0	0	0	0	0	0	0	0	0	0	0	0	0
8	6	2018-04-25		0	0	1	0	0	0	0	0	0	0	0	0	0	0	0	0	0	0	0	0	0	0	0	0	0	0	0	0	0	0	0	0	0	0	0	0	0	0	0	0	0	0	0	0	0	0
8	5	2018-04-26		0	1	0	0	0	0	0	0	0	0	0	0	0	0	0	0	0	0	0	0	0	0	0	0	0	0	0	0	0	0	0	0	0	0	0	0	0	0	0	1	0	0	0	0	0	0
8	9	2018-04-28		0	2	0	0	0	0	0	0	0	0	2	0	0	0	0	0	0	0	0	0	0	0	0	0	0	0	0	0	0	0	0	0	0	0	0	0	0	0	0	0	0	0	0	0	0	0
8	7	2018-05-02		0	1	0	0	0	0	0	0	0	0	0	0	0	0	0	0	0	0	0	0	0	0	0	0	0	1	0	0	0	0	0	0	0	0	0	0	0	0	0	0	0	0	0	0	0	0
8	10	2018-05-04		0	1	0	0	0	0	0	0	0	0	1	0	0	0	0	0	0	0	0	0	0	0	0	0	0	0	0	0	0	0	0	0	0	0	0	0	0	0	0	0	0	0	0	0	0	0
8	5	2018-05-07		0	2	0	0	0	0	0	0	0	0	1	0	0	0	0	0	0	0	0	0	0	0	0	0	0	0	0	0	0	0	0	0	0	0	0	0	0	0	1	0	0	0	0	0	0	0
8	9	2018-05-10		0	2	0	0	0	0	0	0	0	0	0	0	0	0	0	0	0	0	0	0	0	0	0	0	0	0	0	0	0	0	0	0	0	0	0	0	0	0	1	0	0	0	0	0	0	0
8	7	2018-05-12		0	2	0	0	0	0	0	0	0	0	2	0	0	0	0	0	0	0	0	0	0	0	0	0	0	0	0	0	0	0	0	0	0	0	0	0	0	0	0	0	0	0	0	0	0	0
8	9	2018-05-15		0	2	0	0	0	0	0	0	0	0	0	0	0	0	0	0	0	0	0	0	0	0	0	0	0	0	0	0	0	0	0	0	0	0	0	0	0	0	0	0	0	0	0	0	0	1
8	4.5	2018-05-17		0	0	0	0	0	0	0	0	0	0	0	0	0	0	0	0	0	0	0	0	0	0	0	0	0	0	0	0	0	0	0	0	0	0	0	0	0	0	0	0	0	0	0	0	0	0
8	4	2018-05-20		0	1	0	0	0	0	0	0	0	0	0	0	0	0	0	0	0	0	0	0	0	0	0	1	0	0	0	0	0	0	0	0	0	0	0	0	0	0	0	0	0	0	0	0	0	0
8	4	2018-05-23		0	1	0	0	0	0	0	0	0	0	0	0	0	0	0	0	0	0	0	0	0	0	0	1	0	0	0	0	0	0	0	0	0	0	0	0	0	0	0	0	0	0	0	0	0	0
8	5	2018-05-25		0	1	0	0	0	0	0	0	0	0	0	0	0	0	0	0	0	0	0	0	0	0	0	0	0	0	0	0	0	0	0	0	0	0	0	0	0	0	1	0	0	0	0	0	0	0
8	3.5	2018-05-30		0	0	1	0	0	0	0	0	0	0	0	0	0	0	0	0	0	0	0	0	0	0	0	0	0	0	0	0	0	0	0	0	0	0	0	0	0	0	0	0	0	0	0	0	0	0
8	13	2018-06-02		0	1	0	1	0	0	0	0	0	0	0	0	0	0	0	0	0	0	0	0	0	0	0	0	0	0	0	0	0	0	0	0	0	0	0	0	0	0	0	0	0	0	0	0	0	0
8	10.5	2018-06-05		0	0	1	0	0	0	0	0	0	0	0	0	0	0	0	0	0	0	0	0	0	0	0	0	0	0	0	0	0	0	0	0	0	0	0	0	0	0	0	0	0	0	0	0	0	0
8	10.5	2018-06-09		0	1	0	0	0	0	0	0	0	0	0	0	0	0	0	0	1	0	0	0	0	0	0	0	0	0	0	0	0	0	0	0	0	0	0	0	0	0	0	0	0	0	0	0	0	0
8	10	2018-06-13		0	2	0	0	0	0	0	0	0	0	0	0	0	0	0	0	0	0	0	0	0	1	0	0	0	0	0	0	0	0	0	0	0	0	0	0	0	0	0	0	0	0	1	0	0	0
8	11	2018-06-16		0	1	0	0	0	0	0	0	0	0	1	0	0	0	0	0	0	0	0	0	0	0	0	0	0	0	0	0	0	0	0	0	0	0	0	0	0	0	0	0	0	0	0	0	0	0
8	9	2018-06-19		0	0	0	0	0	0	0	0	0	0	0	0	0	0	0	0	0	0	0	0	0	0	0	0	0	0	0	0	0	0	0	0	0	0	0	0	0	0	0	0	0	0	0	0	0	0
8	11	2018-06-23		0	1	0	0	0	0	0	0	0	0	0	0	0	0	0	0	0	0	0	0	0	1	0	0	0	0	0	0	0	0	0	0	0	0	0	0	0	0	0	0	0	0	0	0	0	0
8	6	2018-06-26		0	0	1	0	0	0	0	0	0	0	0	0	0	0	0	0	0	0	0	0	0	0	0	0	0	0	0	0	0	0	0	0	0	0	0	0	0	0	0	0	0	0	0	0	0	0
8	7	2018-06-28		0	1	0	0	0	0	0	0	0	0	0	0	0	0	0	0	0	0	0	0	0	0	0	0	0	0	0	0	0	0	0	0	0	0	0	0	0	0	0	0	0	0	0	0	0	0
8	5	2018-06-30		0	0	1	0	0	0	0	0	0	0	0	0	0	0	0	0	0	0	0	0	0	0	0	0	0	0	0	0	0	0	0	0	0	0	0	0	0	0	0	0	0	0	0	0	0	0
8	9	2018-07-03		0	1	0	0	1	0	0	0	0	0	0	0	0	0	0	0	0	0	0	0	0	0	0	0	0	0	0	0	0	0	0	0	0	0	0	0	0	0	0	0	0	0	0	0	0	0
8	3	2018-07-04		0	1	0	0	0	0	0	0	0	0	0	0	0	0	0	0	0	0	0	0	0	0	0	0	0	0	0	0	0	0	0	0	0	0	0	0	0	0	0	1	0	0	0	0	0	0
8	6	2018-07-06		0	0	1	0	0	0	0	0	0	0	0	0	0	0	0	0	0	0	0	0	0	0	0	0	0	0	0	0	0	0	0	0	0	0	0	0	0	0	0	0	0	0	0	0	0	0
8	6	2018-07-09		0	0	1	0	0	0	0	0	0	0	0	0	0	0	0	0	0	0	0	0	0	0	0	0	0	0	0	0	0	0	0	0	0	0	0	0	0	0	0	0	0	0	0	0	0	0
8	8	2018-07-09		0	1	0	0	0	0	0	0	0	0	1	0	0	0	0	0	0	0	0	0	0	0	0	0	0	0	0	0	0	0	0	0	0	0	0	0	0	0	0	0	0	0	0	0	0	0
8	7	2018-07-18		0	1	0	0	0	0	0	0	0	0	0	0	0	0	0	0	0	0	0	0	0	0	0	0	0	0	0	0	0	0	0	0	0	0	0	0	0	0	0	1	0	0	0	0	0	0
8	9	2018-07-21		0	1	0	0	0	0	0	0	0	0	0	0	0	0	0	0	0	0	0	0	0	0	0	0	0	0	0	0	0	0	0	0	0	0	0	0	0	0	0	0	0	0	0	0	0	1
10	3	2015-11-14		0	2	0	0	0	0	0	0	0	0	0	0	0	0	0	0	0	0	0	0	0	0	0	0	0	0	0	0	0	0	0	0	0	0	0	0	0	0	1	1	0	0	0	0	0	0
10	3	2015-11-18		0	1	0	0	0	0	0	0	0	0	0	0	0	0	0	0	0	0	0	0	0	0	0	0	0	0	0	0	0	0	0	0	0	0	0	0	0	0	1	0	0	0	0	0	0	0
10	5	2015-11-19		0	2	0	0	0	0	0	0	0	0	0	0	0	0	0	0	0	0	0	0	0	0	0	1	0	1	0	0	0	0	0	0	0	0	0	0	0	0	0	0	0	0	0	0	0	0
10	6	2016-02-26		0	0	0	0	0	0	0	0	0	0	0	0	0	0	0	0	0	0	0	0	0	0	0	0	0	0	0	0	0	0	0	0	0	0	0	0	0	0	0	0	0	0	0	0	0	0
10	4	2018-10-17		1	0	0	0	0	0	0	0	0	0	0	0	0	0	0	0	0	0	0	0	0	0	0	0	0	0	0	0	0	0	0	0	0	0	0	0	0	0	0	0	0	0	0	0	0	0
10	4	2018-10-18		1	0	0	0	0	0	0	0	0	0	0	0	0	0	0	0	0	0	0	0	0	0	0	0	0	0	0	0	0	0	0	0	0	0	0	0	0	0	0	0	0	0	0	0	0	0
10	3	2018-10-20		0	1	0	0	0	0	0	0	0	0	0	0	0	0	0	0	0	0	0	0	0	0	0	0	0	1	0	0	0	0	0	0	0	0	0	0	0	0	0	0	0	0	0	0	0	0
10	5	2018-10-23		0	0	1	0	0	0	0	0	0	0	0	0	0	0	0	0	0	0	0	0	0	0	0	0	0	0	0	0	0	0	0	0	0	0	0	0	0	0	0	0	0	0	0	0	0	0
10	5	2018-10-26		1	0	0	0	0	0	0	0	0	0	0	0	0	0	0	0	0	0	0	0	0	0	0	0	0	0	0	0	0	0	0	0	0	0	0	0	0	0	0	0	0	0	0	0	0	0
10	4	2018-10-28		0	2	0	0	0	0	0	0	0	0	0	0	0	0	0	0	0	0	0	0	0	0	0	0	0	1	0	0	0	0	0	0	0	0	0	0	0	0	0	1	0	0	0	0	0	0
10	5	2018-11-01		0	2	0	0	0	0	0	0	0	0	0	0	0	0	0	0	0	0	0	0	0	0	0	1	0	0	0	0	0	0	0	0	0	0	0	0	0	0	0	0	0	0	0	0	0	0
10	4	2018-11-03		0	0	1	0	0	0	0	0	0	0	0	0	0	0	0	0	0	0	0	0	0	0	0	0	0	0	0	0	0	0	0	0	0	0	0	0	0	0	0	0	0	0	0	0	0	0
10	3	2018-11-05		0	1	0	0	0	0	0	0	0	0	0	0	0	0	0	0	0	0	0	0	0	0	0	0	0	0	0	0	0	0	0	0	0	0	0	0	0	0	0	1	0	0	0	0	0	0
10	3	2018-11-08		0	1	0	0	0	0	0	0	0	0	0	0	0	0	0	0	0	0	0	0	0	0	0	0	0	0	0	0	0	0	0	0	0	0	0	0	0	0	1	0	0	0	0	0	0	0
10	3	2018-11-12		0	1	0	0	0	0	0	0	0	0	0	0	0	0	0	0	0	0	0	0	0	0	0	0	0	1	0	0	0	0	0	0	0	0	0	0	0	0	0	0	0	0	0	0	0	0
10		2018-11-22		0	1	0	0	0	0	0	0	0	0	0	0	0	0	0	0	0	0	0	0	0	0	0	0	0	1	0	0	0	0	0	0	0	0	0	0	0	0	0	0	0	0	0	0	0	0
10	2	2018-11-27		0	1	0	0	0	0	0	0	0	0	0	0	0	0	0	0	0	0	0	0	0	0	0	0	0	0	0	0	0	0	0	0	0	0	0	0	0	0	1	0	0	0	0	0	0	0
10	4	2018-12-01		0	1	0	0	0	0	0	0	0	0	0	0	0	0	0	0	0	0	0	0	0	0	0	0	0	1	0	0	0	0	0	0	0	0	0	0	0	0	0	0	0	0	0	0	0	0
10	4	2018-12-05		0	1	0	0	0	0	0	0	0	0	0	0	0	0	0	0	0	0	0	0	0	0	0	0	0	0	0	0	0	0	0	0	0	0	0	0	0	0	0	0	0	0	0	0	0	1
10	6	2018-12-07		0	1	0	0	0	0	0	0	0	0	0	0	0	0	0	0	0	0	0	0	0	0	0	0	0	0	0	0	0	0	0	0	0	0	0	0	0	0	0	1	0	0	0	0	0	0
10	4	2018-12-10		0	1	0	0	0	0	0	0	0	0	0	0	0	0	0	0	0	0	0	0	0	0	0	0	0	0	0	0	0	0	0	0	0	0	0	0	0	0	1	0	0	0	0	0	0	0
10	5	2018-12-14		0	2	0	0	0	0	0	0	0	0	0	0	0	0	0	0	0	0	0	0	0	0	0	0	0	0	0	0	0	0	0	0	0	0	0	0	0	0	0	2	0	0	0	0	0	0
10	3	2018-12-16		0	1	0	0	0	0	0	0	0	0	0	0	0	0	0	0	0	0	0	0	0	0	0	0	0	0	0	0	0	0	0	0	0	0	0	0	0	0	1	0	0	0	0	0	0	0
10	3	2018-12-20		0	1	0	0	0	0	0	0	0	0	0	0	0	0	0	0	0	0	0	0	0	0	0	0	0	0	0	0	0	0	0	0	0	0	0	0	0	0	1	0	0	0	0	0	0	0
10		2018-12-22		0	1	0	0	0	0	0	0	0	0	0	0	0	0	0	0	0	0	0	0	0	0	0	0	0	0	0	0	0	0	0	0	0	0	0	0	0	0	0	0	0	0	0	0	0	0
10	5	2018-12-23		0	1	0	0	0	0	0	0	0	0	1	0	0	0	0	0	0	0	0	0	0	0	0	0	0	0	0	0	0	0	0	0	0	0	0	0	0	0	0	0	0	0	0	0	0	0
10	5	2018-12-25		1	0	0	0	0	0	0	0	0	0	0	0	0	0	0	0	0	0	0	0	0	0	0	0	0	0	0	0	0	0	0	0	0	0	0	0	0	0	0	0	0	0	0	0	0	0
10	3	2018-12-28		0	0	1	0	0	0	0	0	0	0	0	0	0	0	0	0	0	0	0	0	0	0	0	0	0	0	0	0	0	0	0	0	0	0	0	0	0	0	0	0	0	0	0	0	0	0
10	5	2018-12-30		0	2	0	0	0	0	0	0	0	0	0	0	0	0	0	0	0	0	0	0	0	0	0	0	0	1	0	0	0	0	0	0	0	0	0	0	0	0	0	1	0	0	0	0	0	0
10	8	2019-01-02		0	0	1	0	0	0	0	0	0	0	0	0	0	0	0	0	0	0	0	0	0	0	0	0	0	0	0	0	0	0	0	0	0	0	0	0	0	0	0	0	0	0	0	0	0	0
10	5	2019-01-05		0	2	0	0	0	0	0	0	0	0	0	0	0	0	0	0	0	0	0	0	1	0	0	0	0	0	0	0	0	0	0	0	0	0	0	0	0	0	0	1	0	0	0	0	0	0
10	4	2019-01-07		0	1	0	0	0	0	0	0	0	0	0	0	0	0	0	0	0	0	0	0	0	0	0	0	0	0	0	0	0	0	0	0	0	0	0	0	0	0	1	0	0	0	0	0	0	0
10	5	2019-01-12		0	1	0	0	0	0	0	0	0	0	1	0	0	0	0	0	0	0	0	0	0	0	0	0	0	0	0	0	0	0	0	0	0	0	0	0	0	0	0	0	0	0	0	0	0	0
10	4	2019-01-13		0	1	0	0	0	0	0	0	0	0	1	0	0	0	0	0	0	0	0	0	0	0	0	0	0	0	0	0	0	0	0	0	0	0	0	0	0	0	0	0	0	0	0	0	0	0
10	5	2019-01-19		0	2	0	0	0	0	0	0	0	0	1	0	0	0	0	0	0	0	0	0	0	0	0	1	0	0	0	0	0	0	0	0	0	0	0	0	0	0	0	0	0	0	0	0	0	0
10	4	2019-01-24		0	1	0	0	0	0	0	0	0	0	0	0	0	0	0	0	0	0	0	0	0	0	0	0	0	0	0	0	0	0	0	0	0	0	0	0	0	0	0	1	0	0	0	0	0	0
10	7	2019-01-27		0	0	1	0	0	0	0	0	0	0	0	0	0	0	0	0	0	0	0	0	0	0	0	0	0	0	0	0	0	0	0	0	0	0	0	0	0	0	0	0	0	0	0	0	0	0
10	53	2019-01-31		0	5	0	0	1	0	0	0	0	0	2	1	0	0	0	0	0	0	0	0	0	0	0	0	0	0	0	0	0	0	1	0	0	0	0	0	0	0	0	0	0	0	0	0	0	0
10	5	2019-02-07		0	1	0	0	1	0	0	0	0	0	0	0	0	0	0	0	0	0	0	0	0	0	0	0	0	0	0	0	0	0	0	0	0	0	0	0	0	0	0	0	0	0	0	0	0	0
10	9	2019-02-08		0	3	0	0	0	0	0	0	0	0	0	0	0	0	0	0	0	0	0	0	0	0	0	0	0	0	0	1	0	0	0	0	0	0	1	0	0	0	1	0	0	0	0	0	0	0
10	7	2019-02-14		0	0	0	0	0	0	0	0	0	0	0	0	0	0	0	0	0	0	0	0	0	0	0	0	0	0	0	0	0	0	0	0	0	0	0	0	0	0	0	0	0	0	0	0	0	0
10	5	2019-02-17		0	1	0	0	0	0	0	0	0	0	0	0	0	0	0	0	0	0	0	0	1	0	0	0	0	0	0	0	0	0	0	0	0	0	0	0	0	0	0	0	0	0	0	0	0	0
10	5	2019-02-20		0	0	0	0	0	0	0	0	0	0	0	0	0	0	0	0	0	0	0	0	0	0	0	0	0	0	0	0	0	0	0	0	0	0	0	0	0	0	0	0	0	0	0	0	0	0
10	6	2019-02-23		0	1	0	0	0	0	0	0	0	0	0	0	0	0	0	0	0	0	0	0	0	0	0	0	0	1	0	0	0	0	0	0	0	0	0	0	0	0	0	0	0	0	0	0	0	0
11	2	2018-10-20		0	1	0	0	0	0	0	0	0	0	0	0	0	0	0	0	0	0	0	0	0	0	0	0	0	0	0	0	0	0	0	0	0	0	0	0	0	0	0	1	0	0	0	0	0	0
11	6	2018-10-22		0	1	0	0	0	0	0	0	0	0	0	0	0	0	0	0	0	0	0	0	0	0	0	0	0	0	0	0	0	0	0	0	0	0	0	0	0	0	0	0	0	0	0	0	0	1
11	5	2019-01-07		0	2	0	0	0	0	0	0	0	0	0	0	0	0	0	0	0	0	0	0	0	0	0	0	0	0	0	0	0	0	0	0	0	0	0	0	0	0	0	2	0	0	0	0	0	0
11	5	2019-01-19		0	1	0	0	0	0	0	0	0	0	0	0	0	0	0	0	0	0	0	0	0	0	0	0	0	0	0	0	0	0	0	0	0	0	0	0	0	0	0	0	0	0	0	0	0	0
11	3	2019-01-20		0	1	0	0	0	0	0	0	0	0	0	0	0	0	0	0	0	0	0	0	0	0	0	0	0	0	0	0	1	0	0	0	0	0	0	0	0	0	0	0	0	0	0	0	0	0
11	8	2019-02-15		0	1	0	0	0	0	0	0	0	0	0	0	0	1	0	0	0	0	0	0	0	0	0	0	0	0	0	0	0	0	0	0	0	0	0	0	0	0	0	0	0	0	0	0	0	0
12	10.5	2018-05-14		0	1	0	0	0	0	0	0	0	0	1	0	0	0	0	0	0	0	0	0	0	0	0	0	0	0	0	0	0	0	0	0	0	0	0	0	0	0	0	0	0	0	0	0	0	0
12	11	2018-05-18		0	1	0	0	0	0	0	0	0	0	0	0	0	0	0	0	0	0	0	0	0	0	0	0	0	0	0	0	0	0	0	0	0	0	0	0	0	0	1	0	0	0	0	0	0	0
12	9	2018-05-22		0	1	0	0	0	0	0	0	0	0	0	0	0	0	0	0	0	0	0	0	0	0	0	0	0	0	0	0	0	0	1	0	0	0	0	0	0	0	0	0	0	0	0	0	0	0
12	13	2018-05-27		0	1	0	0	0	0	0	0	0	0	0	0	0	0	0	0	0	0	0	0	0	0	0	0	0	1	0	0	0	0	0	0	0	0	0	0	0	0	0	0	0	0	0	0	0	0
12	10	2018-05-30		0	1	0	0	0	0	0	0	0	0	0	0	0	0	0	0	0	0	0	0	0	0	0	0	0	0	0	0	0	0	0	0	0	0	0	0	0	0	1	0	0	0	0	0	0	0
12	11	2018-06-01		0	2	0	0	0	0	0	0	0	0	0	0	0	0	0	0	0	0	0	0	0	0	0	0	0	0	0	0	1	0	1	0	0	0	0	0	0	0	0	0	0	0	0	0	0	0
12	10	2018-06-19		0	1	0	0	0	0	0	0	0	0	0	0	0	0	0	0	0	0	0	0	0	0	0	0	0	0	0	0	0	0	0	0	0	0	0	0	0	0	0	0	0	0	0	0	0	0
12	7	2018-06-22		0	1	0	1	0	0	0	0	0	0	0	0	0	0	0	0	0	0	0	0	0	0	0	0	0	0	0	0	0	0	0	0	0	0	0	0	0	0	0	0	0	0	0	0	0	0
12	11	2018-06-26		0	1	0	1	0	0	0	0	0	0	0	0	0	0	0	0	0	0	0	0	0	0	0	0	0	0	0	0	0	0	0	0	0	0	0	0	0	0	0	0	0	0	0	0	0	0
12	9	2018-07-02		0	1	0	0	0	0	0	0	0	0	0	0	0	0	0	0	0	0	0	0	0	0	0	0	0	1	0	0	0	0	0	0	0	0	0	0	0	0	0	0	0	0	0	0	0	0
12	8	2018-07-04		0	1	0	0	0	0	0	0	0	0	1	0	0	0	0	0	0	0	0	0	0	0	0	0	0	0	0	0	0	0	0	0	0	0	0	0	0	0	0	0	0	0	0	0	0	0
12	10	2018-07-07		0	1	0	0	1	0	0	0	0	0	0	0	0	0	0	0	0	0	0	0	0	0	0	0	0	0	0	0	0	0	0	0	0	0	0	0	0	0	0	0	0	0	0	0	0	0
12	10	2018-07-14		0	1	0	0	0	0	0	0	0	0	0	0	0	0	0	0	0	0	0	0	0	0	0	1	0	0	0	0	0	0	0	0	0	0	0	0	0	0	0	0	0	0	0	0	0	0
12	12	2018-07-17		0	1	0	0	0	0	0	0	0	0	0	0	0	0	0	0	0	0	0	0	0	0	0	0	0	0	0	0	0	0	0	0	0	0	0	0	0	0	0	0	0	1	0	0	0	0
12	7	2018-07-19		0	1	0	0	0	0	0	0	0	0	0	0	0	0	0	0	0	0	0	0	0	0	0	1	0	0	0	0	0	0	0	0	0	0	0	0	0	0	0	0	0	0	0	0	0	0
12	12	2018-07-20		0	1	0	0	1	0	0	0	0	0	0	0	0	0	0	0	0	0	0	0	0	0	0	0	0	0	0	0	0	0	0	0	0	0	0	0	0	0	0	0	0	0	0	0	0	0
12	10	2018-07-24		0	1	0	0	1	0	0	0	0	0	0	0	0	0	0	0	0	0	0	0	0	0	0	0	0	0	0	0	0	0	0	0	0	0	0	0	0	0	0	0	0	0	0	0	0	0
13	6.5	2018-03-24		0	2	0	0	0	0	0	0	1	0	0	0	0	0	0	0	0	0	0	0	0	0	0	0	0	0	0	0	0	0	0	0	0	0	0	0	0	0	1	0	0	0	0	0	0	0
13	7.5	2018-03-29		0	1	0	0	0	0	0	0	0	0	0	0	0	0	0	0	0	0	0	0	0	0	0	0	0	0	0	0	0	0	0	0	0	0	0	0	0	0	0	1	0	0	0	0	0	0
13		2018-04-12		0	1	0	0	0	0	0	0	0	0	1	0	0	0	0	0	0	0	0	0	0	0	0	0	0	0	0	0	0	0	0	0	0	0	0	0	0	0	0	0	0	0	0	0	0	0
13		2019-03-13		0	0	1	0	0	0	0	0	0	0	0	0	0	0	0	0	0	0	0	0	0	0	0	0	0	0	0	0	0	0	0	0	0	0	0	0	0	0	0	0	0	0	0	0	0	0
15	6	2018-10-26		0	1	0	0	0	0	0	0	0	0	0	0	0	0	0	0	0	0	0	0	0	0	0	0	0	0	0	0	0	0	0	0	0	0	0	0	0	0	1	0	0	0	0	0	0	0
15		2018-10-28		0	0	1	0	0	0	0	0	0	0	0	0	0	0	0	0	0	0	0	0	0	0	0	0	0	0	0	0	0	0	0	0	0	0	0	0	0	0	0	0	0	0	0	0	0	0
15	4.5	2018-11-06		0	0	1	0	0	0	0	0	0	0	0	0	0	0	0	0	0	0	0	0	0	0	0	0	0	0	0	0	0	0	0	0	0	0	0	0	0	0	0	0	0	0	0	0	0	0
15	7	2018-11-17		0	1	0	0	1	0	0	0	0	0	0	0	0	0	0	0	0	0	0	0	0	0	0	0	0	0	0	0	0	0	0	0	0	0	0	0	0	0	0	0	0	0	0	0	0	0
16	3	2018-10-17		0	0	1	0	0	0	0	0	0	0	0	0	0	0	0	0	0	0	0	0	0	0	0	0	0	0	0	0	0	0	0	0	0	0	0	0	0	0	0	0	0	0	0	0	0	0
16	3	2018-10-18		0	1	0	0	0	0	0	0	0	0	0	0	0	0	0	0	0	0	0	0	0	0	0	0	0	0	0	0	0	0	0	0	0	0	0	0	0	0	0	1	0	0	0	0	0	0
16	2.5	2018-10-19		1	0	0	0	0	0	0	0	0	0	0	0	0	0	0	0	0	0	0	0	0	0	0	0	0	0	0	0	0	0	0	0	0	0	0	0	0	0	0	0	0	0	0	0	0	0
16	2.5	2018-10-20		1	0	0	0	0	0	0	0	0	0	0	0	0	0	0	0	0	0	0	0	0	0	0	0	0	0	0	0	0	0	0	0	0	0	0	0	0	0	0	0	0	0	0	0	0	0
16	3	2018-10-21		0	1	0	0	0	0	0	0	0	0	0	0	0	0	0	0	0	0	0	0	0	0	0	0	0	0	0	0	0	0	0	0	0	0	0	0	0	0	1	0	0	0	0	0	0	0
16	3	2018-10-22		0	0	1	0	0	0	0	0	0	0	0	0	0	0	0	0	0	0	0	0	0	0	0	0	0	0	0	0	0	0	0	0	0	0	0	0	0	0	0	0	0	0	0	0	0	0
16	3	2018-10-24		1	0	0	0	0	0	0	0	0	0	0	0	0	0	0	0	0	0	0	0	0	0	0	0	0	0	0	0	0	0	0	0	0	0	0	0	0	0	0	0	0	0	0	0	0	0
16	4	2018-10-25		0	1	0	0	1	0	0	0	0	0	0	0	0	0	0	0	0	0	0	0	0	0	0	0	0	0	0	0	0	0	0	0	0	0	0	0	0	0	0	0	0	0	0	0	0	0
16	2.5	2018-10-30		0	0	1	0	0	0	0	0	0	0	0	0	0	0	0	0	0	0	0	0	0	0	0	0	0	0	0	0	0	0	0	0	0	0	0	0	0	0	0	0	0	0	0	0	0	0
16	2	2018-11-03		0	0	1	0	0	0	0	0	0	0	0	0	0	0	0	0	0	0	0	0	0	0	0	0	0	0	0	0	0	0	0	0	0	0	0	0	0	0	0	0	0	0	0	0	0	0
16		2018-11-08		0	0	1	0	0	0	0	0	0	0	0	0	0	0	0	0	0	0	0	0	0	0	0	0	0	0	0	0	0	0	0	0	0	0	0	0	0	0	0	0	0	0	0	0	0	0
16	4	2018-11-12		0	1	0	0	1	0	0	0	0	0	0	0	0	0	0	0	0	0	0	0	0	0	0	0	0	0	0	0	0	0	0	0	0	0	0	0	0	0	0	0	0	0	0	0	0	0
16	4	2018-11-14		0	1	0	0	0	0	0	0	0	0	1	0	0	0	0	0	0	0	0	0	0	0	0	0	0	0	0	0	0	0	0	0	0	0	0	0	0	0	0	0	0	0	0	0	0	0
16	7	2018-11-23		0	1	0	0	0	0	0	0	0	0	0	0	0	0	0	0	0	0	0	0	0	0	0	0	0	0	0	0	0	0	0	0	0	0	0	0	0	0	1	0	0	0	0	0	0	0
16	5	2018-11-30		0	1	0	0	0	0	0	0	0	0	0	0	0	0	0	0	0	0	0	0	0	0	0	0	0	0	0	0	0	0	0	0	0	0	0	0	0	0	1	0	0	0	0	0	0	0
16	8	2018-10-29		0	1	0	0	0	0	0	0	0	0	0	0	1	0	0	0	0	0	0	0	0	0	0	0	0	0	0	0	0	0	0	0	0	0	0	0	0	0	0	0	0	0	0	0	0	0
16	9	2018-11-18		0	2	0	0	1	0	0	0	0	0	1	0	0	0	0	0	0	0	0	0	0	0	0	0	0	0	0	0	0	0	0	0	0	0	0	0	0	0	0	0	0	0	0	0	0	0
16	7	2018-11-30		0	1	0	0	0	0	0	0	0	0	0	0	0	0	0	0	0	0	0	0	0	0	0	0	0	0	0	0	1	0	0	0	0	0	0	0	0	0	0	0	0	0	0	0	0	0
16	8	2018-12-07		0	1	0	0	0	0	0	0	0	0	0	0	0	0	0	0	0	0	0	0	0	0	0	0	0	0	0	0	0	0	0	0	0	0	1	0	0	0	0	0	0	0	0	0	0	0
16	9	2018-12-14		1	0	0	0	0	0	0	0	0	0	0	0	0	0	0	0	0	0	0	0	0	0	0	0	0	0	0	0	0	0	0	0	0	0	0	0	0	0	0	0	0	0	0	0	0	0
16		2018-12-22		0	3	0	0	0	0	0	0	0	0	0	0	0	0	0	0	0	0	0	0	0	0	0	0	0	0	0	0	0	0	0	0	0	1	2	0	0	0	0	0	0	0	0	0	0	0
16	154	2019-01-11		0	3	0	0	0	0	0	0	0	0	0	0	0	0	0	0	0	0	0	0	0	0	0	0	0	0	0	0	0	0	0	0	0	0	3	0	0	0	0	0	0	0	0	0	0	0
18	8.5	2018-10-25		0	1	0	1	0	0	0	0	0	0	0	0	0	0	0	0	0	0	0	0	0	0	0	0	0	0	0	0	0	0	0	0	0	0	0	0	0	0	0	0	0	0	0	0	0	0
18	8.5	2018-10-26		0	1	0	0	1	0	0	0	0	0	0	0	0	0	0	0	0	0	0	0	0	0	0	0	0	0	0	0	0	0	0	0	0	0	0	0	0	0	0	0	0	0	0	0	0	0
18	6	2018-10-27		0	1	0	0	1	0	0	0	0	0	0	0	0	0	0	0	0	0	0	0	0	0	0	0	0	0	0	0	0	0	0	0	0	0	0	0	0	0	0	0	0	0	0	0	0	0
18	9	2018-10-28		0	0	1	0	0	0	0	0	0	0	0	0	0	0	0	0	0	0	0	0	0	0	0	0	0	0	0	0	0	0	0	0	0	0	0	0	0	0	0	0	0	0	0	0	0	0
18	10.5	2018-10-29		0	1	0	0	0	0	0	0	0	0	1	0	0	0	0	0	0	0	0	0	0	0	0	0	0	0	0	0	0	0	0	0	0	0	0	0	0	0	0	0	0	0	0	0	0	0
18	9	2018-11-01		0	1	0	0	1	0	0	0	0	0	0	0	0	0	0	0	0	0	0	0	0	0	0	0	0	0	0	0	0	0	0	0	0	0	0	0	0	0	0	0	0	0	0	0	0	0
18	11	2018-11-02		0	1	0	1	0	0	0	0	0	0	0	0	0	0	0	0	0	0	0	0	0	0	0	0	0	0	0	0	0	0	0	0	0	0	0	0	0	0	0	0	0	0	0	0	0	0
18	6.5	2018-11-03		0	1	0	0	0	0	0	0	0	0	1	0	0	0	0	0	0	0	0	0	0	0	0	0	0	0	0	0	0	0	0	0	0	0	0	0	0	0	0	0	0	0	0	0	0	0
18	10	2018-11-05		0	1	0	1	0	0	0	0	0	0	0	0	0	0	0	0	0	0	0	0	0	0	0	0	0	0	0	0	0	0	0	0	0	0	0	0	0	0	0	0	0	0	0	0	0	0
18	56	2018-11-06		0	1	0	1	0	0	0	0	0	0	0	0	0	0	0	0	0	0	0	0	0	0	0	0	0	0	0	0	0	0	0	0	0	0	0	0	0	0	0	0	0	0	0	0	0	0
18	10.5	2018-11-14		0	1	0	1	0	0	0	0	0	0	0	0	0	0	0	0	0	0	0	0	0	0	0	0	0	0	0	0	0	0	0	0	0	0	0	0	0	0	0	0	0	0	0	0	0	0
18	13	2018-11-18		0	1	0	0	0	0	0	0	0	0	0	0	0	0	0	0	0	0	0	0	0	0	0	0	0	0	0	0	0	0	0	0	0	0	0	0	0	0	1	0	0	0	0	0	0	0
18	7	2018-11-20		0	1	0	0	1	0	0	0	0	0	0	0	0	0	0	0	0	0	0	0	0	0	0	0	0	0	0	0	0	0	0	0	0	0	0	0	0	0	0	0	0	0	0	0	0	0
18	9	2018-11-24		0	0	1	0	0	0	0	0	0	0	0	0	0	0	0	0	0	0	0	0	0	0	0	0	0	0	0	0	0	0	0	0	0	0	0	0	0	0	0	0	0	0	0	0	0	0
18		2018-11-27		0	1	0	0	1	0	0	0	0	0	0	0	0	0	0	0	0	0	0	0	0	0	0	0	0	0	0	0	0	0	0	0	0	0	0	0	0	0	0	0	0	0	0	0	0	0
18	8.5	2018-12-02		0	1	0	1	0	0	0	0	0	0	0	0	0	0	0	0	0	0	0	0	0	0	0	0	0	0	0	0	0	0	0	0	0	0	0	0	0	0	0	0	0	0	0	0	0	0
18	9	2018-12-05		0	1	0	0	1	0	0	0	0	0	0	0	0	0	0	0	0	0	0	0	0	0	0	0	0	0	0	0	0	0	0	0	0	0	0	0	0	0	0	0	0	0	0	0	0	0
18	9.5	2018-12-08		0	1	0	0	1	0	0	0	0	0	0	0	0	0	0	0	0	0	0	0	0	0	0	0	0	0	0	0	0	0	0	0	0	0	0	0	0	0	0	0	0	0	0	0	0	0
18	7	2018-12-09		0	0	1	0	0	0	0	0	0	0	0	0	0	0	0	0	0	0	0	0	0	0	0	0	0	0	0	0	0	0	0	0	0	0	0	0	0	0	0	0	0	0	0	0	0	0
18	7	2018-12-11		0	1	0	0	1	0	0	0	0	0	0	0	0	0	0	0	0	0	0	0	0	0	0	0	0	0	0	0	0	0	0	0	0	0	0	0	0	0	0	0	0	0	0	0	0	0
18	8	2018-12-21		0	0	1	0	0	0	0	0	0	0	0	0	0	0	0	0	0	0	0	0	0	0	0	0	0	0	0	0	0	0	0	0	0	0	0	0	0	0	0	0	0	0	0	0	0	0
18	8	2018-12-27		0	1	0	0	1	0	0	0	0	0	0	0	0	0	0	0	0	0	0	0	0	0	0	0	0	0	0	0	0	0	0	0	0	0	0	0	0	0	0	0	0	0	0	0	0	0
18	8	2019-01-10		0	1	0	1	0	0	0	0	0	0	0	0	0	0	0	0	0	0	0	0	0	0	0	0	0	0	0	0	0	0	0	0	0	0	0	0	0	0	0	0	0	0	0	0	0	0
18	8	2019-01-28		0	1	0	0	1	0	0	0	0	0	0	0	0	0	0	0	0	0	0	0	0	0	0	0	0	0	0	0	0	0	0	0	0	0	0	0	0	0	0	0	0	0	0	0	0	0
19	4	2018-10-22		0	1	0	0	1	0	0	0	0	0	0	0	0	0	0	0	0	0	0	0	0	0	0	0	0	0	0	0	0	0	0	0	0	0	0	0	0	0	0	0	0	0	0	0	0	0
19	11	2018-10-29		0	1	0	1	0	0	0	0	0	0	0	0	0	0	0	0	0	0	0	0	0	0	0	0	0	0	0	0	0	0	0	0	0	0	0	0	0	0	0	0	0	0	0	0	0	0
19	6	2018-11-08		0	2	0	0	0	0	0	0	0	0	1	0	0	0	0	0	0	0	0	0	0	0	0	0	0	0	0	0	0	0	1	0	0	0	0	0	0	0	0	0	0	0	0	0	0	0
19	8	2018-11-09		1	0	0	0	0	0	0	0	0	0	0	0	0	0	0	0	0	0	0	0	0	0	0	0	0	0	0	0	0	0	0	0	0	0	0	0	0	0	0	0	0	0	0	0	0	0
19	11	2018-11-18		0	2	0	0	0	0	0	1	0	0	0	0	0	0	0	0	0	0	0	0	0	0	0	0	0	0	0	0	0	0	0	0	0	0	0	0	0	0	0	0	0	0	0	0	0	0
19	33.5	2018-11-25		0	2	0	0	0	0	1	0	0	0	0	0	0	0	0	0	0	0	0	0	0	0	0	0	0	0	0	0	0	0	0	0	0	0	0	0	0	0	0	0	0	0	0	0	1	0
19	7	2018-12-07		0	0	1	0	0	0	0	0	0	0	0	0	0	0	0	0	0	0	0	0	0	0	0	0	0	0	0	0	0	0	0	0	0	0	0	0	0	0	0	0	0	0	0	0	0	0
19	9	2018-12-18		0	2	0	0	0	0	0	0	0	0	0	0	1	0	0	0	0	0	0	0	0	0	0	0	0	0	0	0	0	0	1	0	0	0	0	0	0	0	0	0	0	0	0	0	0	0
19	8	2018-12-20		0	0	1	0	0	0	0	0	0	0	0	0	0	0	0	0	0	0	0	0	0	0	0	0	0	0	0	0	0	0	0	0	0	0	0	0	0	0	0	0	0	0	0	0	0	0
19	53.5	2018-12-22		1	0	0	0	0	0	0	0	0	0	0	0	0	0	0	0	0	0	0	0	0	0	0	0	0	0	0	0	0	0	0	0	0	0	0	0	0	0	0	0	0	0	0	0	0	0
19	6	2018-12-31		0	1	0	0	0	0	0	0	0	0	0	0	0	0	0	0	0	0	0	0	0	0	0	0	0	0	0	0	0	0	0	0	0	0	0	0	1	0	0	0	0	0	0	0	0	0
19	11	2019-01-10		0	2	0	0	2	0	0	0	0	0	0	0	0	0	0	0	0	0	0	0	0	0	0	0	0	0	0	0	0	0	0	0	0	0	0	0	0	0	0	0	0	0	0	0	0	0
19	7	2019-01-18		0	1	0	0	0	0	0	1	0	0	0	0	0	0	0	0	0	0	0	0	0	0	0	0	0	0	0	0	0	0	0	0	0	0	0	0	0	0	0	0	0	0	0	0	0	0
20	12	2018-03-15		0	2	0	0	0	0	0	0	0	0	2	0	0	0	0	0	0	0	0	0	0	0	0	0	0	0	0	0	0	0	0	0	0	0	0	0	0	0	0	0	0	0	0	0	0	0
21	24	2018-02-15		0	0	1	0	0	0	0	0	0	0	0	0	0	0	0	0	0	0	0	0	0	0	0	0	0	0	0	0	0	0	0	0	0	0	0	0	0	0	0	0	0	0	0	0	0	0
21	7	2018-11-15		0	1	0	0	0	0	0	0	0	0	0	0	0	0	0	0	0	0	0	0	0	0	0	0	0	0	0	0	0	0	0	1	0	0	0	0	0	0	0	0	0	0	0	0	0	0
23	150	2018-05-23		0	1	0	0	1	0	0	0	0	0	0	0	0	0	0	0	0	0	0	0	0	0	0	0	0	0	0	0	0	0	0	0	0	0	0	0	0	0	0	0	0	0	0	0	0	0
23	8	2018-06-23		0	2	0	0	0	0	0	0	0	0	2	0	0	0	0	0	0	0	0	0	0	0	0	0	0	0	0	0	0	0	0	0	0	0	0	0	0	0	0	0	0	0	0	0	0	0
22	34	2018-03-06		0	2	0	0	0	0	0	0	0	0	1	0	0	0	0	0	0	0	0	0	0	0	0	0	0	0	0	0	0	0	0	0	0	0	0	0	0	0	1	0	0	0	0	0	0	0
22	29	2018-03-09		0	1	0	0	0	0	0	0	0	0	0	0	0	0	0	0	0	0	0	0	0	0	0	1	0	0	0	0	0	0	0	0	0	0	0	0	0	0	0	0	0	0	0	0	0	0
22	30	2018-03-13		0	3	0	0	0	0	0	0	0	0	0	0	1	0	0	0	0	0	0	0	0	0	0	0	0	0	0	0	0	0	0	0	0	0	0	0	0	0	0	1	0	0	0	0	0	0
22	9	2018-03-19		0	2	0	0	0	0	0	0	0	0	0	0	0	0	0	0	0	0	0	0	0	0	0	0	0	0	0	0	0	0	0	0	0	0	0	0	0	0	0	1	0	1	0	0	0	0
22	7	2018-03-20		0	1	0	0	0	0	0	0	0	0	0	0	0	0	0	0	0	0	0	0	0	0	0	0	0	0	0	0	0	0	0	0	0	0	0	0	0	0	0	0	0	1	0	0	0	0
22	10	2018-03-24		0	1	0	0	0	0	0	0	0	0	0	0	0	0	0	0	0	0	0	0	0	1	0	0	0	0	0	0	0	0	0	0	0	0	0	0	0	0	0	0	0	0	0	0	0	0
22	8	2018-03-29		0	1	0	0	0	0	0	0	0	0	0	0	0	0	0	0	0	0	0	0	0	0	0	0	0	0	0	0	0	0	0	0	0	0	0	0	0	0	0	1	0	0	0	0	0	0
22	7	2018-04-04		0	2	0	0	0	0	0	0	0	0	0	0	0	0	0	0	0	0	0	0	0	0	0	0	0	0	0	0	0	0	0	0	0	0	0	0	0	0	0	1	0	0	0	0	1	0
24	2	2018-05-12		0	1	0	0	0	0	0	0	0	0	1	0	0	0	0	0	0	0	0	0	0	0	0	0	0	0	0	0	0	0	0	0	0	0	0	0	0	0	0	0	0	0	0	0	0	0
25	74	2018-11-15		0	0	1	0	0	0	0	0	0	0	0	0	0	0	0	0	0	0	0	0	0	0	0	0	0	0	0	0	0	0	0	0	0	0	0	0	0	0	0	0	0	0	0	0	0	0
25	9	2018-12-02		0	2	0	0	0	0	0	0	0	0	1	0	0	0	0	0	0	0	0	0	0	0	0	0	0	0	0	0	0	0	0	0	0	0	0	0	0	0	0	0	0	0	0	0	0	0
25	8	2018-12-10		0	0	1	0	0	0	0	0	0	0	0	0	0	0	0	0	0	0	0	0	0	0	0	0	0	0	0	0	0	0	0	0	0	0	0	0	0	0	0	0	0	0	0	0	0	0
25	8	2018-12-10		0	0	1	0	0	0	0	0	0	0	0	0	0	0	0	0	0	0	0	0	0	0	0	0	0	0	0	0	0	0	0	0	0	0	0	0	0	0	0	0	0	0	0	0	0	0
25	57	2018-12-11		0	1	0	0	0	0	0	0	0	0	0	0	1	0	0	0	0	0	0	0	0	0	0	0	0	0	0	0	0	0	0	0	0	0	0	0	0	0	0	0	0	0	0	0	0	0
25	81	2018-12-27		0	1	0	0	0	0	0	1	0	0	0	0	0	0	0	0	0	0	0	0	0	0	0	0	0	0	0	0	0	0	0	0	0	0	0	0	0	0	0	0	0	0	0	0	0	0
25	5	2019-01-13		0	1	0	0	0	0	0	0	0	0	0	0	0	0	0	0	0	0	0	0	0	0	0	0	0	0	0	0	0	0	0	0	0	0	0	0	0	0	0	1	0	0	0	0	0	0
25	5	2019-01-21		0	1	0	0	0	0	0	0	0	1	0	0	0	0	0	0	0	0	0	0	0	0	0	0	0	0	0	0	0	0	0	0	0	0	0	0	0	0	0	0	0	0	0	0	0	0
25	9	2019-01-25		0	1	0	0	1	0	0	0	0	0	0	0	0	0	0	0	0	0	0	0	0	0	0	0	0	0	0	0	0	0	0	0	0	0	0	0	0	0	0	0	0	0	0	0	0	0
25	4	2019-02-09		0	1	0	0	0	0	0	0	0	0	0	0	0	0	0	0	0	0	0	0	0	0	0	0	0	0	0	0	0	0	0	0	0	0	0	0	0	0	0	1	0	0	0	0	0	0
25	4	2019-02-12		0	1	0	0	0	0	0	0	0	0	0	0	0	0	0	1	0	0	0	0	0	0	0	0	0	0	0	0	0	0	0	0	0	0	0	0	0	0	0	0	0	0	0	0	0	0
25	4	2019-02-16		0	1	0	0	0	0	0	0	0	0	0	0	0	0	0	0	0	0	0	0	0	0	0	0	0	0	0	0	0	0	0	0	0	0	0	0	0	0	0	0	0	0	0	0	0	0
25	5	2019-02-22		0	1	0	0	0	0	0	0	0	0	0	0	0	0	0	0	0	0	0	0	0	0	0	0	0	0	0	0	0	0	0	0	0	0	0	0	0	0	0	0	0	0	0	0	1	0
26	5	2018-10-26		0	2	0	0	0	0	0	0	0	0	0	0	0	0	0	0	0	0	0	0	0	0	0	0	0	0	0	0	0	0	0	0	0	0	0	0	0	0	0	1	0	1	0	0	0	0
26	9	2018-11-01		0	1	0	0	0	0	0	0	0	0	1	0	0	0	0	0	0	0	0	0	0	0	0	0	0	0	0	0	0	0	0	0	0	0	0	0	0	0	0	0	0	0	0	0	0	0
26	3	2018-11-15		0	2	0	0	0	0	0	0	0	0	0	0	0	0	0	0	0	0	0	0	0	0	0	0	0	0	0	0	0	0	0	0	0	0	0	0	0	0	0	2	0	0	0	0	0	0
26	4	2018-11-19		0	1	0	0	0	0	0	0	0	0	0	0	0	0	0	0	0	0	0	1	0	0	0	0	0	0	0	0	0	0	0	0	0	0	0	0	0	0	0	0	0	0	0	0	0	0
26	53	2018-12-11		0	1	0	0	0	0	0	0	0	0	0	0	0	0	1	0	0	0	0	0	0	0	0	0	0	0	0	0	0	0	0	0	0	0	0	0	0	0	0	0	0	0	0	0	0	0
26	5	2018-12-29		1	0	0	0	0	0	0	0	0	0	0	0	0	0	0	0	0	0	0	0	0	0	0	0	0	0	0	0	0	0	0	0	0	0	0	0	0	0	0	0	0	0	0	0	0	0
26		2018-12-31		0	1	0	0	0	0	0	0	0	0	0	0	0	0	0	0	0	0	0	0	0	0	0	0	0	0	0	0	0	0	0	0	0	0	0	0	0	0	0	0	0	1	0	0	0	0
26	10	2019-01-08		0	0	1	0	0	0	0	0	0	0	0	0	0	0	0	0	0	0	0	0	0	0	0	0	0	0	0	0	0	0	0	0	0	0	0	0	0	0	0	0	0	0	0	0	0	0
26	9	2019-01-15		0	2	0	0	0	0	0	0	0	0	0	0	0	0	0	0	0	0	0	0	0	0	0	0	0	0	0	1	0	0	0	1	0	0	0	0	0	0	0	0	0	0	0	0	0	0
26		2019-01-21		0	0	1	0	0	0	0	0	0	0	0	0	0	0	0	0	0	0	0	0	0	0	0	0	0	0	0	0	0	0	0	0	0	0	0	0	0	0	0	0	0	0	0	0	0	0
26	4	2019-02-02		0	1	0	0	0	0	0	0	0	0	0	0	0	0	0	0	0	0	0	0	0	0	0	0	0	0	0	0	0	0	0	0	0	0	0	0	0	0	0	1	0	0	0	0	0	0
26	8	2019-02-03		0	1	0	0	0	0	0	0	0	0	0	0	0	0	0	0	0	0	0	0	0	0	0	0	0	0	0	0	0	0	0	0	0	0	0	0	0	0	0	0	0	0	0	0	0	0
26	6	2019-02-06		0	1	0	0	0	0	0	0	0	0	0	0	0	0	0	0	0	0	0	0	0	0	0	0	0	0	0	0	0	0	0	0	0	0	0	0	0	0	0	0	0	1	0	0	0	0
26	10	2019-02-23		0	1	0	0	0	0	0	0	0	0	0	0	0	0	0	0	0	0	0	0	0	0	0	0	0	0	0	0	0	0	0	0	0	0	0	0	0	0	0	0	0	0	1	0	0	0
26	7	2019-02-24		0	2	0	0	0	0	0	0	0	0	1	0	0	0	0	0	0	0	0	0	0	0	0	0	0	0	0	0	0	0	0	0	0	0	0	0	0	0	0	0	0	0	1	0	0	0
28	8	2018-10-17		0	0	1	0	0	0	0	0	0	0	0	0	0	0	0	0	0	0	0	0	0	0	0	0	0	0	0	0	0	0	0	0	0	0	0	0	0	0	0	0	0	0	0	0	0	0
28	9	2018-10-18		0	0	1	0	0	0	0	0	0	0	0	0	0	0	0	0	0	0	0	0	0	0	0	0	0	0	0	0	0	0	0	0	0	0	0	0	0	0	0	0	0	0	0	0	0	0
28	5	2018-10-20		1	0	0	0	0	0	0	0	0	0	0	0	0	0	0	0	0	0	0	0	0	0	0	0	0	0	0	0	0	0	0	0	0	0	0	0	0	0	0	0	0	0	0	0	0	0
28	9	2018-10-25		0	2	0	0	1	0	0	0	0	0	0	0	0	0	0	0	0	0	0	0	1	0	0	0	0	0	0	0	0	0	0	0	0	0	0	0	0	0	0	0	0	0	0	0	0	0
28	8	2018-10-29		0	1	0	0	0	0	0	0	0	0	0	0	0	0	0	0	0	0	0	0	0	0	0	0	0	0	0	0	0	0	0	0	0	0	0	0	0	0	0	0	0	0	0	0	0	0
28	5	2018-11-01		0	1	0	0	1	0	0	0	0	0	0	0	0	0	0	0	0	0	0	0	0	0	0	0	0	0	0	0	0	0	0	0	0	0	0	0	0	0	0	0	0	0	0	0	0	0
28	11	2018-11-16		0	2	0	0	0	0	0	1	0	0	0	0	0	0	0	0	0	0	0	0	0	0	0	0	0	0	0	0	0	0	0	0	0	0	0	0	0	0	0	0	0	0	0	0	0	0
28	9	2018-11-21		0	1	0	0	0	0	1	0	0	0	0	0	0	0	0	0	0	0	0	0	0	0	0	0	0	0	0	0	0	0	0	0	0	0	0	0	0	0	0	0	0	0	0	0	0	0
28	10	2018-11-30		0	0	1	0	0	0	0	0	0	0	0	0	0	0	0	0	0	0	0	0	0	0	0	0	0	0	0	0	0	0	0	0	0	0	0	0	0	0	0	0	0	0	0	0	0	0
28	6	2018-12-02		0	2	0	0	0	0	0	0	0	0	0	0	0	0	0	0	1	0	0	0	0	0	0	0	0	0	0	0	0	0	0	0	0	0	0	0	0	0	1	0	0	0	0	0	0	0
28	10	2018-12-06		0	2	0	0	0	0	0	0	0	0	0	0	0	0	0	0	0	0	0	0	0	0	0	0	0	0	0	0	0	0	1	0	0	0	0	0	0	0	0	0	0	0	0	0	0	0
28	80	2018-12-11		0	2	0	0	0	0	0	1	0	0	1	0	0	0	0	0	0	0	0	0	0	0	0	0	0	0	0	0	0	0	0	0	0	0	0	0	0	0	0	0	0	0	0	0	0	0
28	10	2018-12-16		0	2	0	0	0	0	0	0	0	0	0	0	0	0	0	0	0	0	0	1	0	0	0	0	0	0	0	0	0	0	0	0	0	0	0	0	0	0	0	0	0	0	0	0	0	0
28	10	2018-12-20		0	1	0	0	0	0	0	0	0	0	0	0	0	0	0	0	0	0	0	0	0	0	0	0	0	0	0	0	0	0	0	0	0	0	0	0	0	0	1	0	0	0	0	0	0	0
28	34	2018-12-23		0	1	0	0	0	0	0	0	0	0	1	0	0	0	0	0	0	0	0	0	0	0	0	0	0	0	0	0	0	0	0	0	0	0	0	0	0	0	0	0	0	0	0	0	0	0
28	7	2018-12-29		0	2	0	0	1	0	0	0	0	0	1	0	0	0	0	0	0	0	0	0	0	0	0	0	0	0	0	0	0	0	0	0	0	0	0	0	0	0	0	0	0	0	0	0	0	0
28	10	2019-01-03		0	3	0	0	0	0	0	1	0	0	0	0	0	1	0	0	0	0	0	0	0	0	0	0	0	0	0	0	0	0	0	0	0	0	0	0	0	0	1	0	0	0	0	0	0	0
28	5	2019-01-07		1	0	0	0	0	0	0	0	0	0	0	0	0	0	0	0	0	0	0	0	0	0	0	0	0	0	0	0	0	0	0	0	0	0	0	0	0	0	0	0	0	0	0	0	0	0
28	15	2019-01-11		0	2	0	0	0	0	0	0	0	0	1	0	0	0	0	0	0	0	0	0	0	0	0	0	0	0	0	0	0	0	0	0	0	0	0	0	0	0	1	0	0	0	0	0	0	0
28	7	2019-01-14		0	1	0	0	1	0	0	0	0	0	0	0	0	0	0	0	0	0	0	0	0	0	0	0	0	0	0	0	0	0	0	0	0	0	0	0	0	0	0	0	0	0	0	0	0	0
28	16	2019-01-15		0	0	1	0	0	0	0	0	0	0	0	0	0	0	0	0	0	0	0	0	0	0	0	0	0	0	0	0	0	0	0	0	0	0	0	0	0	0	0	0	0	0	0	0	0	0
28	9	2019-01-17		0	2	0	0	0	0	0	0	0	0	0	0	0	0	0	0	0	0	0	0	0	0	0	0	0	0	0	0	0	0	1	1	0	0	0	0	0	0	0	0	0	0	0	0	0	0
28	4	2019-01-19		0	0	1	0	0	0	0	0	0	0	0	0	0	0	0	0	0	0	0	0	0	0	0	0	0	0	0	0	0	0	0	0	0	0	0	0	0	0	0	0	0	0	0	0	0	0
28	6	2019-01-20		0	0	1	0	0	0	0	0	0	0	0	0	0	0	0	0	0	0	0	0	0	0	0	0	0	0	0	0	0	0	0	0	0	0	0	0	0	0	0	0	0	0	0	0	0	0
28	7	2019-01-25		0	0	1	0	0	0	0	0	0	0	0	0	0	0	0	0	0	0	0	0	0	0	0	0	0	0	0	0	0	0	0	0	0	0	0	0	0	0	0	0	0	0	0	0	0	0
28	7	2019-01-27		0	1	0	0	0	0	0	0	0	0	0	0	0	0	0	0	0	0	0	0	0	0	0	0	0	0	0	0	0	0	0	0	1	0	0	0	0	0	0	0	0	0	0	0	0	0
28	6	2019-01-28		0	1	0	0	0	0	0	0	0	0	0	0	0	0	0	0	0	0	0	0	1	0	0	0	0	0	0	0	0	0	0	0	0	0	0	0	0	0	0	0	0	0	0	0	0	0
28	4	2019-01-29		0	1	0	0	0	0	0	0	0	0	0	0	0	0	0	0	0	0	0	0	0	0	0	0	0	0	0	0	1	0	0	0	0	0	0	0	0	0	0	0	0	0	0	0	0	0
28	9	2019-01-31		0	0	1	0	0	0	0	0	0	0	0	0	0	0	0	0	0	0	0	0	0	0	0	0	0	0	0	0	0	0	0	0	0	0	0	0	0	0	0	0	0	0	0	0	0	0
28	55	2019-02-02		0	3	0	0	0	0	0	0	0	0	1	1	0	0	0	0	0	0	0	0	0	0	0	0	0	0	0	0	0	0	0	0	0	0	0	0	0	0	0	0	0	0	1	0	0	0
28	9	2019-02-09		0	1	0	0	0	0	0	0	0	0	0	0	0	0	0	0	0	0	0	0	1	0	0	0	0	0	0	0	0	0	0	0	0	0	0	0	0	0	0	0	0	0	0	0	0	0
28	4	2019-02-14		0	1	0	0	0	0	0	0	0	0	0	0	0	0	0	0	0	0	0	0	0	0	0	0	0	0	0	0	0	0	0	0	0	0	0	0	0	0	0	1	0	0	0	0	0	0
28	9	2019-02-17		0	1	0	0	0	0	0	1	0	0	0	0	0	0	0	0	0	0	0	0	0	0	0	0	0	0	0	0	0	0	0	0	0	0	0	0	0	0	0	0	0	0	0	0	0	0
28	8	2019-02-19		0	0	1	0	0	0	0	0	0	0	0	0	0	0	0	0	0	0	0	0	0	0	0	0	0	0	0	0	0	0	0	0	0	0	0	0	0	0	0	0	0	0	0	0	0	0
28	56	2019-02-21		0	2	0	0	1	0	0	0	0	0	0	0	0	0	0	0	0	0	0	0	0	0	0	0	0	0	0	0	0	0	0	0	0	0	0	0	0	0	1	0	0	0	0	0	0	0
30	9	2018-03-13		0	1	0	0	0	0	0	0	0	0	0	0	0	0	0	0	0	0	0	0	0	0	0	0	0	0	0	0	0	0	0	0	0	0	0	0	0	0	1	0	0	0	0	0	0	0
30	3	2018-03-20		0	1	0	0	0	0	0	0	0	0	0	0	0	0	0	0	0	0	0	0	0	0	0	0	0	0	0	0	0	0	0	0	0	0	0	0	0	0	1	0	0	0	0	0	0	0
31	104	2015-11-11		0	3	0	0	1	0	0	0	0	0	1	0	0	0	0	0	0	0	0	0	0	0	0	0	0	0	0	0	0	0	0	0	0	0	0	0	0	0	1	0	0	0	0	0	0	0
31	5	2015-11-19		0	3	0	0	0	0	0	0	0	0	0	0	0	0	0	0	0	0	0	0	0	0	0	0	0	0	0	0	1	0	2	0	0	0	0	0	0	0	0	0	0	0	0	0	0	0
31	130	2018-10-18		0	3	0	0	1	0	0	0	0	0	1	0	0	0	0	0	0	0	0	0	0	0	0	1	0	0	0	0	0	0	0	0	0	0	0	0	0	0	0	0	0	0	0	0	0	0
31	5	2018-10-20		1	0	0	0	0	0	0	0	0	0	0	0	0	0	0	0	0	0	0	0	0	0	0	0	0	0	0	0	0	0	0	0	0	0	0	0	0	0	0	0	0	0	0	0	0	0
31	180	2018-10-27		0	4	0	0	0	0	0	0	0	0	2	0	0	0	0	0	0	0	0	0	0	0	0	0	0	0	0	0	0	0	0	0	0	0	1	0	0	0	1	0	0	0	0	0	0	0
31		2018-11-12		0	0	1	0	0	0	0	0	0	0	0	0	0	0	0	0	0	0	0	0	0	0	0	0	0	0	0	0	0	0	0	0	0	0	0	0	0	0	0	0	0	0	0	0	0	0
31	16	2018-11-22		0	2	0	0	0	0	0	0	0	0	1	0	0	0	0	0	0	0	0	0	0	0	0	0	0	0	0	0	1	0	0	0	0	0	0	0	0	0	0	0	0	0	0	0	0	0
31	32	2018-11-24		0	3	0	1	0	0	0	0	0	0	0	0	0	1	0	0	0	0	0	0	0	0	0	0	0	0	0	0	0	0	0	0	0	1	0	0	0	0	0	0	0	0	0	0	0	0
31	6	2018-11-26		0	1	0	0	0	0	0	0	0	0	0	0	0	0	0	0	0	0	0	0	0	0	0	0	0	0	0	0	0	0	1	0	0	0	0	0	0	0	0	0	0	0	0	0	0	0
31		2018-11-29		0	0	1	0	0	0	0	0	0	0	0	0	0	0	0	0	0	0	0	0	0	0	0	0	0	0	0	0	0	0	0	0	0	0	0	0	0	0	0	0	0	0	0	0	0	0
31	10	2018-11-30		0	3	0	0	0	0	0	0	0	0	1	0	0	0	0	0	0	0	0	0	0	0	0	0	0	0	0	0	1	0	1	0	0	0	0	0	0	0	0	0	0	0	0	0	0	0
31	24	2018-12-06		0	0	1	0	0	0	0	0	0	0	0	0	0	0	0	0	0	0	0	0	0	0	0	0	0	0	0	0	0	0	0	0	0	0	0	0	0	0	0	0	0	0	0	0	0	0
31		2018-12-10		1	0	0	0	0	0	0	0	0	0	0	0	0	0	0	0	0	0	0	0	0	0	0	0	0	0	0	0	0	0	0	0	0	0	0	0	0	0	0	0	0	0	0	0	0	0
31	53	2019-01-31		0	4	0	0	1	0	0	0	0	0	0	0	0	1	0	0	0	0	0	0	0	0	0	1	0	0	0	0	0	0	0	0	0	0	0	0	0	0	1	0	0	0	0	0	0	0
31	5	2019-02-10		0	0	1	0	0	0	0	0	0	0	0	0	0	0	0	0	0	0	0	0	0	0	0	0	0	0	0	0	0	0	0	0	0	0	0	0	0	0	0	0	0	0	0	0	0	0
31	5	2019-02-12		0	1	0	0	0	0	0	0	0	0	0	0	0	0	0	0	0	0	0	0	0	0	0	0	0	0	0	0	0	0	0	0	0	0	0	0	0	0	1	0	0	0	0	0	0	0
31	73	2019-02-14		0	3	0	0	1	0	0	0	0	0	2	0	0	0	0	0	0	0	0	0	0	0	0	0	0	0	0	0	0	0	0	0	0	0	0	0	0	0	0	0	0	0	0	0	0	0
31	49	2019-02-22		0	3	0	0	1	0	0	0	0	0	2	0	0	0	0	0	0	0	0	0	0	0	0	0	0	0	0	0	0	0	0	0	0	0	0	0	0	0	0	0	0	0	0	0	0	0
32	4	2015-11-14		0	0	1	0	0	0	0	0	0	0	0	0	0	0	0	0	0	0	0	0	0	0	0	0	0	0	0	0	0	0	0	0	0	0	0	0	0	0	0	0	0	0	0	0	0	0
32	3	2015-11-15		0	1	0	0	0	0	0	0	0	0	0	0	0	0	0	0	0	0	0	0	0	0	0	0	0	0	0	0	0	0	0	0	0	0	0	0	0	0	0	0	0	0	0	0	0	0
32	2	2015-11-16		0	1	0	0	0	0	0	0	0	0	0	0	0	0	0	0	0	0	0	0	0	0	0	0	0	0	0	0	0	0	0	0	0	0	0	0	0	0	1	0	0	0	0	0	0	0
32	6	2015-11-17		0	1	0	0	0	0	0	0	0	0	0	0	0	0	0	0	0	0	0	0	0	0	0	0	0	0	0	0	0	0	0	0	0	0	0	0	0	0	0	0	0	0	0	0	0	0
32	4	2015-11-20		0	0	1	0	0	0	0	0	0	0	0	0	0	0	0	0	0	0	0	0	0	0	0	0	0	0	0	0	0	0	0	0	0	0	0	0	0	0	0	0	0	0	0	0	0	0
32	4	2018-10-18		0	1	0	0	0	0	0	0	0	0	0	0	0	0	0	0	0	0	0	0	0	0	0	0	0	0	0	0	0	0	0	0	0	0	0	0	0	0	0	1	0	0	0	0	0	0
32	1	2018-10-21		0	1	0	0	0	0	0	0	0	0	0	0	0	0	0	0	0	0	0	1	0	0	0	0	0	0	0	0	0	0	0	0	0	0	0	0	0	0	0	0	0	0	0	0	0	0
32	2	2018-10-29		1	0	0	0	0	0	0	0	0	0	0	0	0	0	0	0	0	0	0	0	0	0	0	0	0	0	0	0	0	0	0	0	0	0	0	0	0	0	0	0	0	0	0	0	0	0
32	3	2018-11-02		0	1	0	0	0	0	0	0	0	0	1	0	0	0	0	0	0	0	0	0	0	0	0	0	0	0	0	0	0	0	0	0	0	0	0	0	0	0	0	0	0	0	0	0	0	0
32	2	2018-11-05		0	1	0	0	0	0	0	0	0	0	0	0	0	0	0	0	0	0	0	0	0	0	0	0	0	0	0	0	0	0	0	0	0	0	0	0	0	0	1	0	0	0	0	0	0	0
32	2	2018-11-08		0	1	0	0	0	0	0	0	0	0	0	0	0	0	0	0	0	0	0	0	0	0	0	0	0	0	0	0	0	0	0	0	0	0	0	0	0	0	1	0	0	0	0	0	0	0
32	2	2018-11-09		0	1	0	0	0	0	0	0	0	0	0	0	0	0	0	0	0	0	0	0	0	0	0	0	0	0	0	0	0	0	0	0	0	0	0	0	0	0	1	0	0	0	0	0	0	0
32	3	2018-11-10		0	0	1	0	0	0	0	0	0	0	0	0	0	0	0	0	0	0	0	0	0	0	0	0	0	0	0	0	0	0	0	0	0	0	0	0	0	0	0	0	0	0	0	0	0	0
32	4	2018-11-11		0	0	1	0	0	0	0	0	0	0	0	0	0	0	0	0	0	0	0	0	0	0	0	0	0	0	0	0	0	0	0	0	0	0	0	0	0	0	0	0	0	0	0	0	0	0
32	2	2018-11-12		0	1	0	0	0	0	0	0	0	0	0	0	0	0	0	0	0	0	0	0	0	0	0	0	0	0	0	0	0	0	0	0	0	0	0	0	0	0	1	0	0	0	0	0	0	0
32	4	2018-11-22		0	0	1	0	0	0	0	0	0	0	0	0	0	0	0	0	0	0	0	0	0	0	0	0	0	0	0	0	0	0	0	0	0	0	0	0	0	0	0	0	0	0	0	0	0	0
32	4	2018-11-25		0	2	0	0	0	0	0	0	0	0	0	0	0	0	0	0	0	0	0	0	0	0	0	0	0	0	0	0	0	0	0	0	0	0	0	0	0	0	1	0	0	0	0	0	0	0
32	2	2018-11-26		0	1	0	0	0	0	0	0	0	0	0	0	0	0	0	0	0	0	0	0	0	0	0	0	0	0	0	0	0	0	0	0	0	0	0	0	0	0	1	0	0	0	0	0	0	0
32	2	2018-11-29		0	0	1	0	0	0	0	0	0	0	0	0	0	0	0	0	0	0	0	0	0	0	0	0	0	0	0	0	0	0	0	0	0	0	0	0	0	0	0	0	0	0	0	0	0	0
32		2018-12-08		0	1	0	0	0	0	0	0	0	0	0	0	0	0	0	0	0	0	0	0	0	0	0	0	0	0	0	0	0	0	0	0	0	0	0	0	0	0	1	0	0	0	0	0	0	0
32	4	2018-12-10		1	0	0	0	0	0	0	0	0	0	0	0	0	0	0	0	0	0	0	0	0	0	0	0	0	0	0	0	0	0	0	0	0	0	0	0	0	0	0	0	0	0	0	0	0	0
32	5	2018-12-13		0	2	0	0	1	0	0	0	0	0	0	0	0	0	0	0	0	0	0	0	0	0	0	1	0	0	0	0	0	0	0	0	0	0	0	0	0	0	0	0	0	0	0	0	0	0
32	80	2018-12-15		0	4	0	0	0	0	1	0	0	0	0	0	0	0	0	0	0	0	0	0	0	0	0	0	0	0	0	0	1	0	2	0	0	0	0	0	0	0	0	0	0	0	0	0	0	0
32	5	2018-12-20		0	0	1	0	0	0	0	0	0	0	0	0	0	0	0	0	0	0	0	0	0	0	0	0	0	0	0	0	0	0	0	0	0	0	0	0	0	0	0	0	0	0	0	0	0	0
32	3	2018-12-23		0	2	0	0	0	0	0	0	0	0	0	0	0	0	0	0	0	0	0	0	0	0	0	0	0	0	0	0	0	0	0	0	0	0	0	0	0	0	1	0	0	1	0	0	0	0
32	4	2018-12-25		0	1	0	0	0	0	0	0	0	0	0	0	0	0	0	0	0	0	0	0	0	0	0	0	0	0	0	0	0	0	0	0	0	0	0	0	0	0	1	0	0	0	0	0	0	0
32	15	2018-12-27		0	3	0	0	2	0	0	0	0	0	0	0	0	0	0	0	0	0	0	0	0	0	0	0	0	0	0	0	0	0	0	0	0	0	0	0	0	0	1	0	0	0	0	0	0	0
32	7	2018-12-31		0	1	0	0	0	0	0	0	0	0	0	0	0	0	0	0	0	0	0	0	1	0	0	0	0	0	0	0	0	0	0	0	0	0	0	0	0	0	0	0	0	0	0	0	0	0
32	4	2019-01-04		0	0	1	0	0	0	0	0	0	0	0	0	0	0	0	0	0	0	0	0	0	0	0	0	0	0	0	0	0	0	0	0	0	0	0	0	0	0	0	0	0	0	0	0	0	0
32	7	2019-01-07		0	2	0	0	0	0	0	0	0	0	1	0	0	0	0	0	0	0	0	0	0	0	0	0	0	0	0	0	0	0	0	0	0	0	0	0	0	0	1	0	0	0	0	0	0	0
32	5	2019-01-08		0	2	0	0	0	0	0	0	0	0	1	0	0	0	0	0	0	0	0	0	0	0	0	0	0	0	0	0	0	0	0	0	0	0	0	0	0	0	1	0	0	0	0	0	0	0
32	4	2019-01-11		0	1	0	0	0	0	0	0	0	0	0	0	0	0	0	0	0	0	0	0	0	0	0	0	0	0	0	0	0	0	0	0	0	0	0	0	0	0	1	0	0	0	0	0	0	0
32		2019-01-12		0	0	0	0	0	0	0	0	0	0	0	0	0	0	0	0	0	0	0	0	0	0	0	0	0	0	0	0	0	0	0	0	0	0	0	0	0	0	0	0	0	0	0	0	0	0
32		2019-01-14		0	0	1	0	0	0	0	0	0	0	0	0	0	0	0	0	0	0	0	0	0	0	0	0	0	0	0	0	0	0	0	0	0	0	0	0	0	0	0	0	0	0	0	0	0	0
32	9	2019-01-15		0	2	0	0	1	0	0	0	0	0	0	0	0	0	0	0	0	0	0	0	0	0	0	0	0	0	0	0	0	0	1	0	0	0	0	0	0	0	0	0	0	0	0	0	0	0
32	5	2019-01-17		0	0	1	0	0	0	0	0	0	0	0	0	0	0	0	0	0	0	0	0	0	0	0	0	0	0	0	0	0	0	0	0	0	0	0	0	0	0	0	0	0	0	0	0	0	0
32	28	2019-01-21		0	6	0	0	0	0	0	0	0	0	1	0	0	1	0	0	0	0	0	0	0	0	0	0	0	0	0	0	3	0	1	0	0	0	0	0	0	0	0	0	0	0	0	0	0	0
32	17	2019-01-26		0	1	0	0	0	0	0	0	0	0	0	0	0	0	0	0	0	0	0	0	0	0	0	1	0	0	0	0	0	0	0	0	0	0	0	0	0	0	0	0	0	0	0	0	0	0
32	6	2019-01-29		0	1	0	0	0	0	0	0	0	0	0	0	0	0	0	1	0	0	0	0	0	0	0	0	0	0	0	0	0	0	0	0	0	0	0	0	0	0	0	0	0	0	0	0	0	0
32	12	2019-02-01		0	2	0	0	1	0	0	0	0	0	0	0	0	0	0	0	0	0	0	1	0	0	0	0	0	0	0	0	0	0	0	0	0	0	0	0	0	0	0	0	0	0	0	0	0	0
32	5	2019-02-04		0	2	0	0	0	0	0	0	0	0	1	0	0	0	0	0	0	0	0	0	0	0	0	1	0	0	0	0	0	0	0	0	0	0	0	0	0	0	0	0	0	0	0	0	0	0
32	9	2019-02-07		0	2	0	0	0	0	0	0	0	0	1	0	0	0	0	0	0	0	0	0	0	0	0	0	0	0	0	0	0	0	0	0	0	0	0	0	0	0	1	0	0	0	0	0	0	0
32	22	2019-02-09		0	4	0	0	1	0	0	0	0	0	2	0	0	0	0	0	0	0	0	0	0	0	0	0	0	0	0	0	0	0	1	0	0	0	0	0	0	0	0	0	0	0	0	0	0	0
32	6	2019-02-15		0	0	1	0	0	0	0	0	0	0	0	0	0	0	0	0	0	0	0	0	0	0	0	0	0	0	0	0	0	0	0	0	0	0	0	0	0	0	0	0	0	0	0	0	0	0
32	7	2019-02-17		0	2	0	0	0	0	0	0	0	0	0	0	0	0	0	0	0	0	0	0	0	0	0	0	0	0	0	0	1	0	1	0	0	0	0	0	0	0	0	0	0	0	0	0	0	0
32	13	2019-02-22		0	2	0	0	0	0	0	0	0	0	2	0	0	0	0	0	0	0	0	0	0	0	0	0	0	0	0	0	0	0	0	0	0	0	0	0	0	0	0	0	0	0	0	0	0	0
32	6	2019-02-25		0	0	1	0	0	0	0	0	0	0	0	0	0	0	0	0	0	0	0	0	0	0	0	0	0	0	0	0	0	0	0	0	0	0	0	0	0	0	0	0	0	0	0	0	0	0
33	15	2018-03-07		0	4	0	0	0	0	0	0	1	0	3	0	0	0	0	0	0	0	0	0	0	0	0	0	0	0	0	0	0	0	0	0	0	0	0	0	0	0	0	0	0	0	0	0	0	0
33	8	2018-03-11		0	1	0	0	0	0	0	0	0	0	1	0	0	0	0	0	0	0	0	0	0	0	0	0	0	0	0	0	0	0	0	0	0	0	0	0	0	0	0	0	0	0	0	0	0	0
33	56	2018-03-16		0	3	0	0	0	0	0	0	1	0	0	0	0	0	0	0	0	0	0	0	0	0	0	0	0	0	0	0	0	0	0	0	0	0	0	0	0	1	0	0	0	0	0	0	0	0
33	8	2018-03-21		0	1	0	0	0	0	0	0	0	0	0	0	0	0	0	0	0	0	0	0	0	0	0	0	0	0	0	0	0	0	0	0	0	0	0	0	0	0	0	0	0	0	0	0	0	0
33	1	2018-03-26		0	1	0	0	0	0	0	0	0	0	0	0	0	0	0	0	0	0	0	0	0	0	0	0	0	0	0	0	0	0	0	0	0	0	0	0	0	0	0	0	0	0	0	0	0	0
33	4	2018-03-28		0	1	0	0	0	0	0	0	0	0	0	0	0	0	0	0	0	0	0	0	0	0	0	0	0	0	0	0	0	0	0	0	0	0	0	0	0	0	0	0	0	0	0	0	0	1
33	6	2018-03-30		0	2	0	0	0	0	0	1	0	0	0	0	0	0	0	0	0	0	0	0	0	0	0	0	0	0	0	0	0	0	0	0	0	0	0	0	0	0	0	0	0	1	0	0	0	0
33	4	2018-04-06		0	1	0	0	0	0	0	0	0	0	0	0	0	0	0	0	0	0	0	0	0	0	0	0	0	0	0	0	0	0	0	0	0	0	0	0	0	0	1	0	0	0	0	0	0	0
33	2	2018-04-07		0	1	0	0	0	0	0	0	1	0	0	0	0	0	0	0	0	0	0	0	0	0	0	0	0	0	0	0	0	0	0	0	0	0	0	0	0	0	0	0	0	0	0	0	0	0
33	12	2018-04-12		0	3	0	0	0	0	0	0	0	0	0	0	0	0	0	0	0	0	0	0	0	0	0	0	0	0	0	0	0	0	0	0	0	0	0	0	0	3	0	0	0	0	0	0	0	0
33		2018-04-19		0	1	0	0	0	0	0	0	0	0	0	0	0	0	0	0	0	0	0	0	0	0	0	0	0	0	0	0	0	0	0	0	0	0	0	0	0	0	0	0	0	0	0	0	0	0
33	6	2018-04-20		0	1	0	0	0	0	0	0	0	0	0	0	0	0	0	0	0	0	0	0	0	0	0	0	0	0	0	0	0	0	0	0	0	0	0	0	0	0	1	0	0	0	0	0	0	0
33	2	2018-04-22		0	1	0	0	0	0	0	0	0	0	0	0	0	0	0	0	0	0	0	0	0	0	0	0	0	0	0	0	0	0	0	0	0	0	0	0	0	0	1	0	0	0	0	0	0	0
33	1	2018-04-24		0	1	0	0	0	0	0	0	0	0	0	1	0	0	0	0	0	0	0	0	0	0	0	0	0	0	0	0	0	0	0	0	0	0	0	0	0	0	0	0	0	0	0	0	0	0
33	2	2018-04-26		0	1	0	0	0	0	0	0	0	0	0	1	0	0	0	0	0	0	0	0	0	0	0	0	0	0	0	0	0	0	0	0	0	0	0	0	0	0	0	0	0	0	0	0	0	0
33	2	2018-05-07		0	2	0	0	0	0	0	0	0	0	0	0	0	0	0	0	0	0	0	0	0	0	0	0	0	0	0	0	0	0	0	0	0	0	0	0	0	0	1	1	0	0	0	0	0	0
33	2	2018-05-17		0	2	0	0	0	0	0	0	0	0	0	0	0	0	0	0	0	0	0	0	0	0	0	0	0	0	0	0	0	0	0	0	0	0	0	0	0	0	0	1	0	0	0	0	0	0
33	34	2018-05-18		0	2	0	1	0	0	0	0	0	0	0	0	0	0	0	0	0	0	0	0	0	0	0	0	0	0	0	0	0	0	0	0	0	0	0	0	0	0	0	0	0	0	0	0	0	0
33	56	2018-05-30		0	2	0	0	0	0	0	0	0	0	2	0	0	0	0	0	0	0	0	0	0	0	0	0	0	0	0	0	0	0	0	0	0	0	0	0	0	0	0	0	0	0	0	0	0	0
33	63	2018-06-05		0	5	0	0	1	0	0	0	0	0	2	0	0	0	0	0	0	0	0	0	0	0	0	0	0	0	0	0	0	0	0	0	0	1	0	0	0	0	1	0	0	0	0	0	0	0
33	60	2018-06-12		0	4	0	0	1	0	0	0	0	0	2	0	0	0	0	0	0	0	0	0	0	0	1	0	0	0	0	0	0	0	0	0	0	0	0	0	0	0	0	0	0	0	0	0	0	0
33	9	2018-06-21		0	3	0	2	0	0	0	0	0	0	0	0	0	0	0	0	0	0	0	0	0	0	0	0	0	0	0	0	0	0	0	0	0	0	0	0	0	0	1	0	0	0	0	0	0	0
33	8	2018-07-02		0	2	0	0	0	0	0	0	0	0	0	0	0	0	0	0	0	0	0	0	0	0	0	0	0	0	0	0	1	0	0	0	0	1	0	0	0	0	0	0	0	0	0	0	0	0
33	7	2018-07-07		0	0	1	0	0	0	0	0	0	0	0	0	0	0	0	0	0	0	0	0	0	0	0	0	0	0	0	0	0	0	0	0	0	0	0	0	0	0	0	0	0	0	0	0	0	0
33	58	2018-07-11		0	3	0	1	0	0	0	0	0	0	1	0	0	0	0	0	0	0	0	0	0	0	0	0	0	1	0	0	0	0	0	0	0	0	0	0	0	0	0	0	0	0	0	0	0	0
33	4	2018-07-14		0	2	0	0	0	0	0	0	0	0	0	0	0	0	0	0	0	0	0	0	0	0	0	0	0	0	0	0	0	0	0	0	0	0	0	0	0	1	1	0	0	0	0	0	0	0
33	5	2018-07-17		0	2	0	0	0	0	0	0	0	0	0	0	0	0	0	0	0	0	0	0	0	0	0	0	0	0	0	0	0	0	0	0	0	0	0	0	0	2	0	0	0	0	0	0	0	0
33	9	2018-07-20		0	0	1	0	0	0	0	0	0	0	0	0	0	0	0	0	0	0	0	0	0	0	0	0	0	0	0	0	0	0	0	0	0	0	0	0	0	0	0	0	0	0	0	0	0	0
33	5	2018-07-21		0	3	0	0	0	0	0	0	0	0	3	0	0	0	0	0	0	0	0	0	0	0	0	0	0	0	0	0	0	0	0	0	0	0	0	0	0	0	0	0	0	0	0	0	0	0
33	12	2018-07-23		0	3	0	0	0	0	0	0	0	0	1	0	0	0	0	0	0	0	0	0	0	0	0	0	0	0	0	0	0	0	0	0	0	0	0	0	0	0	0	1	0	1	0	0	0	0
34	57	2018-04-05		0	3	0	0	0	0	0	0	1	0	1	0	0	0	0	0	0	0	0	0	0	0	0	0	0	0	0	0	0	0	0	0	0	0	0	0	0	0	1	0	0	0	0	0	0	0
34	60	2018-04-09		0	1	0	0	0	0	0	0	1	0	0	0	0	0	0	0	0	0	0	0	0	0	0	0	0	0	0	0	0	0	0	0	0	0	0	0	0	0	0	0	0	0	0	0	0	0
34	58	2018-04-17		0	0	1	0	0	0	0	0	0	0	0	0	0	0	0	0	0	0	0	0	0	0	0	0	0	0	0	0	0	0	0	0	0	0	0	0	0	0	0	0	0	0	0	0	0	0
35	129	2018-04-23		0	0	1	0	0	0	0	0	0	0	0	0	0	0	0	0	0	0	0	0	0	0	0	0	0	0	0	0	0	0	0	0	0	0	0	0	0	0	0	0	0	0	0	0	0	0
35	105.5	2018-05-04		0	1	0	1	0	0	0	0	0	0	0	0	0	0	0	0	0	0	0	0	0	0	0	0	0	0	0	0	0	0	0	0	0	0	0	0	0	0	0	0	0	0	0	0	0	0
35	9	2018-05-25		0	3	0	1	0	0	0	0	0	0	0	0	0	0	0	0	0	0	0	0	0	0	0	1	0	0	0	0	0	0	0	0	0	0	0	0	0	0	1	0	0	0	0	0	0	0
35	109	2018-06-03		0	1	0	1	0	0	0	0	0	0	0	0	0	0	0	0	0	0	0	0	0	0	0	0	0	0	0	0	0	0	0	0	0	0	0	0	0	0	0	0	0	0	0	0	0	0
35	106	2018-06-13		0	3	0	1	0	1	0	0	0	0	0	0	0	0	0	0	0	0	0	0	0	0	0	0	0	0	0	0	0	0	0	0	0	0	0	0	0	0	1	0	0	0	0	0	0	0
35	106	2018-06-20		0	0	1	0	0	0	0	0	0	0	0	0	0	0	0	0	0	0	0	0	0	0	0	0	0	0	0	0	0	0	0	0	0	0	0	0	0	0	0	0	0	0	0	0	0	0
35	131	2018-06-28		0	3	0	1	1	0	0	0	0	0	0	0	0	0	0	0	0	0	0	0	0	0	0	0	0	0	0	0	0	0	0	0	0	0	0	0	0	0	1	0	0	0	0	0	0	0
35	155	2018-07-16		0	1	0	0	1	0	0	0	0	0	0	0	0	0	0	0	0	0	0	0	0	0	0	0	0	0	0	0	0	0	0	0	0	0	0	0	0	0	0	0	0	0	0	0	0	0
36	2	2018-05-12		0	1	0	0	0	0	0	0	0	0	0	0	0	0	0	0	0	0	0	0	0	0	0	0	0	0	0	0	1	0	0	0	0	0	0	0	0	0	0	0	0	0	0	0	0	0
37	5.5	2018-03-12		0	0	1	0	0	0	0	0	0	0	0	0	0	0	0	0	0	0	0	0	0	0	0	0	0	0	0	0	0	0	0	0	0	0	0	0	0	0	0	0	0	0	0	0	0	0
37		2018-04-23		0	1	0	0	0	0	0	0	1	0	0	0	0	0	0	0	0	0	0	0	0	0	0	0	0	0	0	0	0	0	0	0	0	0	0	0	0	0	0	0	0	0	0	0	0	0
37	4	2018-04-27		0	1	0	0	0	0	0	0	0	0	0	0	0	0	0	0	0	0	0	0	0	0	0	0	0	0	0	0	0	0	0	0	0	0	0	0	0	0	0	1	0	0	0	0	0	0
37	9	2018-04-29		0	2	0	0	0	0	0	0	0	0	0	0	0	0	0	0	0	0	0	0	0	0	0	0	0	1	0	0	0	0	0	0	0	0	0	0	0	0	0	0	0	0	0	0	0	1
37	5	2018-05-09		0	1	0	0	0	0	0	0	0	0	0	0	0	0	0	0	0	0	0	0	0	0	0	0	0	0	0	0	0	0	0	0	0	0	0	0	0	0	0	0	0	1	0	0	0	0
37	7	2018-05-16		0	1	0	0	0	0	0	0	0	0	0	0	0	0	0	0	0	0	0	0	0	0	0	0	0	1	0	0	0	0	0	0	0	0	0	0	0	0	0	0	0	0	0	0	0	0
37	5	2018-05-18		0	1	0	0	0	0	0	0	0	0	0	0	0	0	0	0	0	0	0	0	0	0	0	0	0	0	0	0	0	0	0	0	0	0	0	0	0	0	0	1	0	0	0	0	0	0
37	4	2018-05-21		0	1	0	0	0	0	0	0	0	0	1	0	0	0	0	0	0	0	0	0	0	0	0	0	0	0	0	0	0	0	0	0	0	0	0	0	0	0	0	0	0	0	0	0	0	0
37	6	2018-05-23		0	1	0	0	0	0	0	0	0	0	0	1	0	0	0	0	0	0	0	0	0	0	0	0	0	0	0	0	0	0	0	0	0	0	0	0	0	0	0	0	0	0	0	0	0	0
37	3	2018-05-26		0	1	0	0	0	0	0	0	0	0	0	0	0	0	0	0	0	0	0	0	0	0	0	0	0	0	0	0	0	0	0	0	0	0	0	0	0	0	0	0	0	1	0	0	0	0
37	9	2018-06-07		0	2	0	0	0	0	0	0	0	0	1	0	0	0	0	0	0	0	0	0	0	0	0	0	0	0	0	0	0	0	0	0	0	0	0	0	0	0	0	1	0	0	0	0	0	0
37	4	2018-06-13		0	0	1	0	0	0	0	0	0	0	0	0	0	0	0	0	0	0	0	0	0	0	0	0	0	0	0	0	0	0	0	0	0	0	0	0	0	0	0	0	0	0	0	0	0	0
37	8	2018-06-16		0	1	0	0	0	0	0	0	0	0	0	0	0	0	0	0	0	0	0	0	0	0	0	0	0	0	0	0	0	0	0	0	0	0	0	0	0	0	1	0	0	0	0	0	0	0
37	9	2018-06-20		0	1	0	0	1	0	0	0	0	0	0	0	0	0	0	0	0	0	0	0	0	0	0	0	0	0	0	0	0	0	0	0	0	0	0	0	0	0	0	0	0	0	0	0	0	0
37	8	2018-07-07		0	1	0	0	0	0	0	0	0	0	0	0	0	0	0	0	0	0	0	0	0	0	0	0	0	0	0	0	0	0	0	0	0	0	0	0	0	0	0	0	0	0	0	0	0	0
37	4	2018-07-09		0	1	0	0	0	0	0	0	0	0	0	0	0	0	0	0	0	0	0	0	0	0	0	0	0	0	0	0	0	0	0	0	0	0	0	0	0	0	0	1	0	0	0	0	0	0
37	5	2018-07-19		0	1	0	0	0	0	0	0	0	0	0	0	0	0	0	0	0	0	0	0	0	0	0	0	0	0	0	0	0	0	0	0	0	0	0	0	0	0	0	0	0	1	0	0	0	0
37	7	2018-07-22		0	0	1	0	0	0	0	0	0	0	0	0	0	0	0	0	0	0	0	0	0	0	0	0	0	0	0	0	0	0	0	0	0	0	0	0	0	0	0	0	0	0	0	0	0	0
38	9	2018-03-11		0	3	0	0	0	0	0	0	0	0	1	0	0	0	0	0	0	0	0	0	0	0	0	0	0	0	0	0	0	0	0	0	0	0	0	0	0	0	0	1	0	1	0	0	0	0
38	30	2018-03-11		0	4	0	0	0	0	0	0	0	0	2	0	1	0	0	0	0	0	0	0	0	0	0	0	0	0	0	0	0	0	0	0	0	0	0	0	0	0	1	0	0	0	0	0	0	0
38	11	2018-03-13		0	0	1	0	0	0	0	0	0	0	0	0	0	0	0	0	0	0	0	0	0	0	0	0	0	0	0	0	0	0	0	0	0	0	0	0	0	0	0	0	0	0	0	0	0	0
38	80	2018-03-16		0	1	0	0	0	0	0	0	1	0	0	0	0	0	0	0	0	0	0	0	0	0	0	0	0	0	0	0	0	0	0	0	0	0	0	0	0	0	0	0	0	0	0	0	0	0
38	9	2018-04-04		0	2	0	0	0	0	0	0	0	0	0	0	0	0	0	0	0	0	0	0	0	0	0	1	0	0	0	0	0	0	0	0	0	0	0	0	0	0	0	0	0	0	0	0	0	0
38	2	2018-04-10		0	2	0	0	0	0	0	0	0	0	0	0	0	0	0	0	0	0	0	0	0	0	0	0	0	0	0	0	0	0	0	0	0	0	0	0	0	0	0	0	0	0	0	0	1	0
38	4	2018-04-14		0	2	0	0	0	0	0	0	0	0	0	0	0	0	0	0	0	0	0	0	0	0	0	0	0	0	0	0	0	0	0	0	0	0	0	0	0	0	0	1	0	1	0	0	0	0
38		2018-04-19		0	1	0	0	0	0	0	0	0	0	0	0	0	0	0	0	0	0	0	0	0	0	0	0	0	0	0	0	0	0	0	0	0	0	0	0	0	0	0	1	0	0	0	0	0	0
38	1	2018-04-23		0	1	0	0	0	0	0	0	0	0	0	0	0	0	0	0	0	0	0	0	0	0	0	0	0	0	0	0	0	0	0	0	0	0	0	0	0	0	0	1	0	0	0	0	0	0
38	2	2018-04-27		0	1	0	0	0	0	0	0	0	0	0	0	0	0	0	0	0	0	0	0	0	0	0	0	0	0	0	0	0	0	0	0	0	0	0	0	0	0	0	0	0	0	0	0	0	0
38	3	2018-05-07		0	0	1	0	0	0	0	0	0	0	0	0	0	0	0	0	0	0	0	0	0	0	0	0	0	0	0	0	0	0	0	0	0	0	0	0	0	0	0	0	0	0	0	0	0	0
38	6	2018-05-08		0	1	0	0	0	0	0	0	0	0	0	0	0	0	0	0	0	0	0	0	0	0	0	0	0	0	0	0	0	0	0	0	0	0	0	0	0	0	0	0	0	0	0	0	0	0
38	3	2018-05-12		0	1	0	0	0	0	0	0	0	0	0	0	0	0	0	0	0	0	1	0	0	0	0	0	0	0	0	0	0	0	0	0	0	0	0	0	0	0	0	0	0	0	0	0	0	0
38	4	2018-05-14		0	1	0	0	0	0	0	0	0	0	0	0	0	0	0	0	0	0	0	0	0	0	0	0	0	0	0	0	0	0	0	0	0	0	0	0	0	0	0	0	0	1	0	0	0	0
38	56	2018-05-30		0	2	0	0	0	0	0	0	0	0	1	0	0	0	0	0	0	0	0	0	0	1	0	0	0	0	0	0	0	0	0	0	0	0	0	0	0	0	0	0	0	0	0	0	0	0
38	39	2018-06-05		0	2	0	0	0	0	0	0	0	0	1	0	0	0	0	0	0	0	0	0	0	0	0	0	0	0	1	0	0	0	0	0	0	0	0	0	0	0	0	0	0	0	0	0	0	0
38	8	2018-07-03		0	2	0	0	0	0	0	0	0	0	0	0	0	0	0	0	0	0	0	0	0	0	0	0	0	0	0	0	0	0	0	0	0	0	0	0	0	0	0	1	0	0	0	0	0	1
39	11	2018-04-26		0	2	0	0	0	0	0	0	0	0	1	0	0	0	0	0	0	0	0	0	0	0	0	0	0	0	0	0	0	0	0	0	0	0	0	0	0	0	1	0	0	0	0	0	0	0
39	11.5	2018-04-28		0	2	0	1	1	0	0	0	0	0	0	0	0	0	0	0	0	0	0	0	0	0	0	0	0	0	0	0	0	0	0	0	0	0	0	0	0	0	0	0	0	0	0	0	0	0
39	7	2018-04-30		0	1	0	0	0	0	0	0	0	0	0	0	0	0	0	0	0	0	0	0	0	0	0	0	0	0	0	0	0	0	0	0	0	0	0	0	0	0	1	0	0	0	0	0	0	0
39	8	2018-05-02		0	1	0	0	0	0	0	0	0	0	1	0	0	0	0	0	0	0	0	0	0	0	0	0	0	0	0	0	0	0	0	0	0	0	0	0	0	0	0	0	0	0	0	0	0	0
39	8	2018-05-03		0	1	0	0	0	0	0	0	0	0	0	0	0	0	0	0	0	0	0	0	0	0	0	0	0	0	0	0	0	0	0	0	0	0	1	0	0	0	0	0	0	0	0	0	0	0
39	10	2018-05-09		0	1	0	0	0	0	0	0	0	0	0	0	0	0	0	0	0	0	0	0	0	0	0	1	0	0	0	0	0	0	0	0	0	0	0	0	0	0	0	0	0	0	0	0	0	0
39	6.5	2018-05-15		0	1	0	0	0	0	0	0	0	0	0	0	0	0	0	0	0	0	0	0	0	0	0	1	0	0	0	0	0	0	0	0	0	0	0	0	0	0	0	0	0	0	0	0	0	0
39	9	2018-05-18		0	1	0	0	0	0	0	0	0	0	0	0	0	0	0	0	0	0	0	0	0	0	0	0	0	0	0	0	0	0	0	0	0	0	0	0	0	0	0	0	0	0	0	0	0	0
39	10.5	2018-05-19		0	1	0	0	0	0	0	0	0	0	0	0	0	0	0	0	0	0	0	0	0	0	0	1	0	0	0	0	0	0	0	0	0	0	0	0	0	0	0	0	0	0	0	0	0	0
39	6	2018-05-20		0	1	0	0	0	0	0	0	0	0	1	0	0	0	0	0	0	0	0	0	0	0	0	0	0	0	0	0	0	0	0	0	0	0	0	0	0	0	0	0	0	0	0	0	0	0
39	11	2018-05-22		0	1	0	0	0	0	0	0	0	0	0	0	0	0	0	0	0	0	0	0	0	0	0	0	0	0	0	0	0	0	0	0	0	0	0	0	0	0	1	0	0	0	0	0	0	0
39	2.5	2018-05-24		0	1	0	0	0	0	0	0	0	0	0	0	0	0	0	0	0	0	0	0	0	0	0	0	0	0	0	0	1	0	0	0	0	0	0	0	0	0	0	0	0	0	0	0	0	0
39	6.5	2018-05-25		0	1	0	0	0	0	0	0	0	0	0	0	0	0	0	0	0	0	0	0	0	0	0	1	0	0	0	0	0	0	0	0	0	0	0	0	0	0	0	0	0	0	0	0	0	0
39	9.5	2018-05-27		0	1	0	0	0	0	0	0	0	0	0	0	0	0	0	0	0	0	0	0	0	0	0	0	0	0	0	0	0	0	0	0	0	0	0	0	0	0	0	0	0	0	0	0	0	0
39	10	2018-05-30		0	1	0	0	0	0	0	0	0	0	0	0	0	0	0	0	0	0	0	0	0	0	0	0	0	0	0	0	0	0	1	0	0	0	0	0	0	0	0	0	0	0	0	0	0	0
39	9.5	2018-05-31		0	2	0	0	0	0	0	0	0	0	0	0	0	0	0	0	0	0	0	0	0	0	0	0	0	0	0	0	1	0	1	0	0	0	0	0	0	0	0	0	0	0	0	0	0	0
39	11	2018-06-01		0	2	0	0	0	0	0	0	0	0	1	0	0	0	0	0	0	0	0	0	0	0	0	0	0	1	0	0	0	0	0	0	0	0	0	0	0	0	0	0	0	0	0	0	0	0
39	2	2018-06-02		0	1	0	0	0	0	0	0	0	0	1	0	0	0	0	0	0	0	0	0	0	0	0	0	0	0	0	0	0	0	0	0	0	0	0	0	0	0	0	0	0	0	0	0	0	0
39	7	2018-06-09		0	1	0	0	0	0	0	0	0	0	0	0	0	0	0	0	0	0	0	0	0	0	0	0	0	0	0	0	0	0	0	0	0	1	0	0	0	0	0	0	0	0	0	0	0	0
39	9	2018-06-10		0	3	0	0	0	0	0	0	0	0	0	0	0	0	0	0	0	0	0	0	0	0	0	0	0	0	0	0	1	0	1	0	0	1	0	0	0	0	0	0	0	0	0	0	0	0
39	11	2018-06-12		0	1	0	0	0	0	0	0	0	0	0	0	0	0	0	0	0	0	0	0	0	0	0	0	0	0	0	0	1	0	0	0	0	0	0	0	0	0	0	0	0	0	0	0	0	0
39	12	2018-06-16		0	1	0	0	0	0	0	0	0	0	0	0	0	0	0	0	0	0	0	0	0	0	0	0	0	0	0	0	0	0	0	0	0	1	0	0	0	0	0	0	0	0	0	0	0	0
39	11	2018-06-27		0	3	0	1	0	0	0	0	0	0	0	0	0	0	0	0	0	0	0	0	0	0	0	0	0	1	0	0	1	0	0	0	0	0	0	0	0	0	0	0	0	0	0	0	0	0
40	11.5	2018-03-17		0	1	0	0	0	0	0	0	0	0	0	0	0	0	0	0	0	0	0	0	0	0	0	0	0	0	0	0	0	0	0	0	0	0	0	0	0	0	1	0	0	0	0	0	0	0
40	9.5	2018-04-23		0	1	0	0	0	0	0	0	0	0	0	0	0	0	0	0	0	0	0	0	0	0	0	0	0	0	0	0	0	0	0	0	0	0	0	0	0	0	0	1	0	0	0	0	0	0
40	12	2018-04-27		0	1	0	0	0	0	0	0	0	0	0	0	0	0	0	0	0	0	0	0	0	0	0	0	0	0	0	0	0	0	0	0	0	0	0	0	0	0	0	0	0	1	0	0	0	0
40	9.5	2018-05-06		0	1	0	0	0	0	0	0	0	0	0	0	0	0	0	0	0	0	0	0	0	0	0	0	0	0	0	0	0	0	0	0	0	0	0	0	0	0	1	0	0	0	0	0	0	0
40	9	2018-05-11		0	1	0	0	0	0	0	0	0	0	1	0	0	0	0	0	0	0	0	0	0	0	0	0	0	0	0	0	0	0	0	0	0	0	0	0	0	0	0	0	0	0	0	0	0	0
40	10	2018-05-15		0	1	0	0	0	0	0	0	0	0	0	0	0	0	0	0	0	0	0	0	0	0	0	0	0	0	0	0	0	0	0	0	0	0	0	0	0	0	0	0	0	0	0	0	0	0
40	9.5	2018-05-18		0	1	0	0	0	0	0	0	0	0	0	0	0	0	0	0	0	0	0	0	0	0	0	0	0	1	0	0	0	0	0	0	0	0	0	0	0	0	0	0	0	0	0	0	0	0
40	9.5	2018-05-19		0	1	0	0	0	0	0	0	0	0	0	0	0	0	0	0	0	0	0	0	0	0	0	0	0	0	0	0	0	0	0	0	0	0	0	0	0	0	1	0	0	0	0	0	0	0
40	8.5	2018-05-21		0	1	0	0	0	0	0	0	0	0	0	0	0	0	0	0	0	0	0	0	0	0	0	0	0	0	0	0	0	0	0	0	0	0	0	0	0	0	1	0	0	0	0	0	0	0
40	4	2018-05-25		0	1	0	0	1	0	0	0	0	0	0	0	0	0	0	0	0	0	0	0	0	0	0	0	0	0	0	0	0	0	0	0	0	0	0	0	0	0	0	0	0	0	0	0	0	0
40	9	2018-05-27		0	1	0	0	0	0	0	0	0	0	0	0	0	0	0	0	0	0	0	0	0	0	0	0	0	0	0	0	0	0	0	0	0	0	0	0	0	0	1	0	0	0	0	0	0	0
40	10	2018-05-30		0	1	0	0	0	0	0	0	0	0	1	0	0	0	0	0	0	0	0	0	0	0	0	0	0	0	0	0	0	0	0	0	0	0	0	0	0	0	0	0	0	0	0	0	0	0
40	9	2018-06-23		0	1	0	0	1	0	0	0	0	0	0	0	0	0	0	0	0	0	0	0	0	0	0	0	0	0	0	0	0	0	0	0	0	0	0	0	0	0	0	0	0	0	0	0	0	0
40	10	2018-07-22		0	1	0	0	0	0	0	0	0	0	0	0	0	0	0	0	0	0	0	0	0	0	0	0	0	0	0	0	0	0	0	0	0	0	0	0	0	0	0	0	0	0	0	0	0	0
41	10	2018-03-19		0	1	0	0	0	0	0	0	0	0	0	0	0	0	0	0	0	0	0	0	0	0	0	0	0	0	0	0	0	0	0	0	0	0	0	0	0	0	1	0	0	0	0	0	0	0
42	6	2018-10-17		0	2	0	1	0	0	0	0	0	0	0	0	0	0	0	0	0	0	0	0	0	0	1	0	0	0	0	0	0	0	0	0	0	0	0	0	0	0	0	0	0	0	0	0	0	0
42	6	2018-10-20		1	0	0	0	0	0	0	0	0	0	0	0	0	0	0	0	0	0	0	0	0	0	0	0	0	0	0	0	0	0	0	0	0	0	0	0	0	0	0	0	0	0	0	0	0	0
42	5	2018-10-26		0	2	0	0	0	0	0	0	0	0	0	0	0	0	0	0	0	0	0	0	0	0	0	0	0	1	0	0	0	0	0	0	0	0	0	0	0	0	1	0	0	0	0	0	0	0
42	10	2018-10-30		0	1	0	0	0	0	0	0	0	0	0	0	0	0	0	0	0	0	0	0	0	0	0	0	0	1	0	0	0	0	0	0	0	0	0	0	0	0	0	0	0	0	0	0	0	0
42	10	2018-11-02		0	0	1	0	0	0	0	0	0	0	0	0	0	0	0	0	0	0	0	0	0	0	0	0	0	0	0	0	0	0	0	0	0	0	0	0	0	0	0	0	0	0	0	0	0	0
42	7	2018-11-08		0	1	0	0	0	0	0	0	0	0	0	0	0	0	0	0	0	0	0	0	0	0	0	0	0	0	0	0	0	0	0	0	0	0	0	0	0	0	0	0	0	0	0	0	0	0
42	9	2018-11-10		0	2	0	0	0	0	0	0	0	0	0	0	0	0	0	0	0	1	0	0	0	0	0	0	0	0	0	0	0	0	0	0	0	0	0	0	0	0	1	0	0	0	0	0	0	0
42	4	2018-11-14		0	2	0	0	0	0	0	0	0	0	0	0	0	0	0	0	0	0	0	0	0	0	0	0	0	0	0	0	0	0	0	0	0	0	0	0	0	0	0	0	0	1	0	0	0	0
42	4	2018-11-16		0	1	0	0	0	0	0	0	0	0	0	0	0	0	0	0	0	0	0	0	0	0	0	1	0	0	0	0	0	0	0	0	0	0	0	0	0	0	0	0	0	0	0	0	0	0
42	125	2018-11-21		0	2	0	0	0	0	0	1	0	0	1	0	0	0	0	0	0	0	0	0	0	0	0	0	0	0	0	0	0	0	0	0	0	0	0	0	0	0	0	0	0	0	0	0	0	0
42	35	2018-12-16		0	1	0	0	0	0	0	0	0	0	0	0	0	0	0	0	0	0	0	0	0	0	0	0	0	0	0	0	1	0	0	0	0	0	0	0	0	0	0	0	0	0	0	0	0	0
42	51	2018-12-28		0	2	0	0	0	1	0	0	0	0	0	0	0	0	0	0	0	0	0	0	0	0	0	0	0	0	0	0	0	0	0	0	0	0	0	0	0	0	1	0	0	0	0	0	0	0
42	5	2019-01-10		0	0	1	0	0	0	0	0	0	0	0	0	0	0	0	0	0	0	0	0	0	0	0	0	0	0	0	0	0	0	0	0	0	0	0	0	0	0	0	0	0	0	0	0	0	0
42		2019-01-13		1	0	0	0	0	0	0	0	0	0	0	0	0	0	0	0	0	0	0	0	0	0	0	0	0	0	0	0	0	0	0	0	0	0	0	0	0	0	0	0	0	0	0	0	0	0
42	9	2019-01-15		0	2	0	0	1	0	0	0	0	0	0	0	0	0	0	0	0	0	0	0	0	0	0	0	0	0	1	0	0	0	0	0	0	0	0	0	0	0	0	0	0	0	0	0	0	0
42	57	2019-01-16		0	3	0	0	0	0	0	1	0	0	0	0	0	0	0	0	0	0	0	0	0	0	0	0	0	0	0	0	0	0	0	0	0	0	0	0	0	0	1	0	0	0	0	0	0	0
42	11	2019-01-22		0	2	0	0	0	0	0	0	0	0	0	0	1	0	0	0	0	0	0	0	0	0	0	0	0	0	0	0	0	0	0	0	0	0	0	0	0	0	0	0	0	0	1	0	0	0
42	78	2019-01-24		0	3	0	0	1	0	0	0	0	0	1	0	0	0	0	0	0	0	0	0	0	0	0	0	0	1	0	0	0	0	0	0	0	0	0	0	0	0	0	0	0	0	0	0	0	0
42	6	2019-02-02		0	1	0	0	0	0	0	1	0	0	0	0	0	0	0	0	0	0	0	0	0	0	0	0	0	0	0	0	0	0	0	0	0	0	0	0	0	0	0	0	0	0	0	0	0	0
42	9	2019-02-05		0	1	0	0	0	0	0	0	0	0	0	0	0	0	0	0	0	0	0	0	0	0	0	0	0	0	0	0	0	0	0	0	0	0	1	0	0	0	0	0	0	0	0	0	0	0
42	10	2019-02-06		0	3	0	0	0	0	0	0	0	0	0	0	0	0	0	0	0	0	0	0	0	0	0	0	0	0	0	0	1	0	1	0	0	0	0	1	0	0	0	0	0	0	0	0	0	0
42	53	2019-02-15		0	3	0	1	0	0	0	0	0	0	0	0	1	0	0	0	0	0	0	0	0	0	0	0	0	0	0	0	0	0	0	0	0	0	1	0	0	0	0	0	0	0	0	0	0	0
42	34	2019-02-24		0	2	0	0	0	0	0	1	0	0	0	0	0	1	0	0	0	0	0	0	0	0	0	0	0	0	0	0	0	0	0	0	0	0	0	0	0	0	0	0	0	0	0	0	0	0
43	8	2018-03-08		0	1	0	0	0	0	0	0	0	0	0	0	0	0	0	0	0	0	0	0	0	0	0	0	0	0	0	0	0	0	0	0	0	0	0	0	0	0	1	0	0	0	0	0	0	0
43	8	2018-03-10		0	3	0	0	0	0	0	0	3	0	0	0	0	0	0	0	0	0	0	0	0	0	0	0	0	0	0	0	0	0	0	0	0	0	0	0	0	0	0	0	0	0	0	0	0	0
43	6	2018-03-14		0	2	0	0	0	0	0	0	0	0	0	0	0	0	0	0	0	0	0	0	0	0	0	0	0	0	0	0	0	0	0	0	0	0	0	0	0	0	2	0	0	0	0	0	0	0
43	5	2018-03-17		0	2	0	0	0	0	0	0	0	0	0	0	0	0	0	0	0	0	0	0	0	0	0	0	0	0	0	0	0	0	0	0	0	0	0	0	0	0	0	0	0	1	0	0	0	0
43	2	2018-03-19		0	1	0	0	0	0	0	0	1	0	0	0	0	0	0	0	0	0	0	0	0	0	0	0	0	0	0	0	0	0	0	0	0	0	0	0	0	0	0	0	0	0	0	0	0	0
43	3	2018-03-20		0	0	1	0	0	0	0	0	0	0	0	0	0	0	0	0	0	0	0	0	0	0	0	0	0	0	0	0	0	0	0	0	0	0	0	0	0	0	0	0	0	0	0	0	0	0
44	4	2018-04-30		0	1	0	0	0	0	0	0	0	0	0	0	0	0	0	0	0	0	0	0	0	0	0	0	0	0	0	0	0	0	0	0	0	0	0	0	0	0	0	0	1	0	0	0	0	0
44	4	2018-06-16		0	0	0	0	0	0	0	0	0	0	0	0	0	0	0	0	0	0	0	0	0	0	0	0	0	0	0	0	0	0	0	0	0	0	0	0	0	0	0	0	0	0	0	0	0	0
44	3	2018-06-26		0	0	0	0	0	0	0	0	0	0	0	0	0	0	0	0	0	0	0	0	0	0	0	0	0	0	0	0	0	0	0	0	0	0	0	0	0	0	0	0	0	0	0	0	0	0
44	4	2018-06-30		0	0	1	0	0	0	0	0	0	0	0	0	0	0	0	0	0	0	0	0	0	0	0	0	0	0	0	0	0	0	0	0	0	0	0	0	0	0	0	0	0	0	0	0	0	0
44	3	2018-07-08		0	0	1	0	0	0	0	0	0	0	0	0	0	0	0	0	0	0	0	0	0	0	0	0	0	0	0	0	0	0	0	0	0	0	0	0	0	0	0	0	0	0	0	0	0	0
45	5	2018-04-07		0	1	0	0	0	0	0	0	0	0	1	0	0	0	0	0	0	0	0	0	0	0	0	0	0	0	0	0	0	0	0	0	0	0	0	0	0	0	0	0	0	0	0	0	0	0
45	5	2018-04-10		0	1	0	0	0	0	0	0	0	0	0	0	0	0	0	0	0	0	0	0	0	0	0	0	0	0	0	0	0	0	0	0	0	0	0	0	0	0	0	1	0	0	0	0	0	0
45	1	2018-04-15		0	1	0	0	0	0	0	0	0	0	1	0	0	0	0	0	0	0	0	0	0	0	0	0	0	0	0	0	0	0	0	0	0	0	0	0	0	0	0	0	0	0	0	0	0	0
45	4	2018-04-16		0	1	0	0	0	0	0	0	0	0	1	0	0	0	0	0	0	0	0	0	0	0	0	0	0	0	0	0	0	0	0	0	0	0	0	0	0	0	0	0	0	0	0	0	0	0
45	2	2018-04-19		0	0	1	0	0	0	0	0	0	0	0	0	0	0	0	0	0	0	0	0	0	0	0	0	0	0	0	0	0	0	0	0	0	0	0	0	0	0	0	0	0	0	0	0	0	0
45	2	2018-04-21		0	0	0	0	0	0	0	0	0	0	0	0	0	0	0	0	0	0	0	0	0	0	0	0	0	0	0	0	0	0	0	0	0	0	0	0	0	0	0	0	0	0	0	0	0	0
45	2.5	2018-04-25		0	0	1	0	0	0	0	0	0	0	0	0	0	0	0	0	0	0	0	0	0	0	0	0	0	0	0	0	0	0	0	0	0	0	0	0	0	0	0	0	0	0	0	0	0	0
45	4	2018-04-28		0	0	1	0	0	0	0	0	0	0	0	0	0	0	0	0	0	0	0	0	0	0	0	0	0	0	0	0	0	0	0	0	0	0	0	0	0	0	0	0	0	0	0	0	0	0
45	5.5	2018-05-01		0	0	0	0	0	0	0	0	0	0	0	0	0	0	0	0	0	0	0	0	0	0	0	0	0	0	0	0	0	0	0	0	0	0	0	0	0	0	0	0	0	0	0	0	0	0
45	3.5	2018-05-03		0	0	1	0	0	0	0	0	0	0	0	0	0	0	0	0	0	0	0	0	0	0	0	0	0	0	0	0	0	0	0	0	0	0	0	0	0	0	0	0	0	0	0	0	0	0
45	3	2018-05-07		0	1	0	0	0	0	0	0	0	0	1	0	0	0	0	0	0	0	0	0	0	0	0	0	0	0	0	0	0	0	0	0	0	0	0	0	0	0	0	0	0	0	0	0	0	0
45	2.5	2018-05-12		0	0	1	0	0	0	0	0	0	0	0	0	0	0	0	0	0	0	0	0	0	0	0	0	0	0	0	0	0	0	0	0	0	0	0	0	0	0	0	0	0	0	0	0	0	0
45	6	2018-05-15		0	1	0	0	0	0	0	0	0	0	1	0	0	0	0	0	0	0	0	0	0	0	0	0	0	0	0	0	0	0	0	0	0	0	0	0	0	0	0	0	0	0	0	0	0	0
45	5	2018-05-18		0	1	0	0	0	0	0	0	0	0	0	0	0	0	0	0	0	0	0	0	0	0	0	0	0	0	0	0	0	0	0	0	0	0	0	0	0	0	0	1	0	0	0	0	0	0
45	3.5	2018-05-21		0	2	0	0	0	0	0	0	0	0	1	0	0	0	0	0	0	0	0	0	0	0	0	0	0	0	0	0	0	0	0	0	0	0	0	0	0	0	0	1	0	0	0	0	0	0
45	5	2018-05-24		0	1	0	0	0	0	0	0	0	0	1	0	0	0	0	0	0	0	0	0	0	0	0	0	0	0	0	0	0	0	0	0	0	0	0	0	0	0	0	0	0	0	0	0	0	0
45	6	2018-05-26		0	3	0	0	0	0	0	0	0	0	2	0	0	0	0	0	0	0	0	0	0	0	0	0	0	0	0	0	1	0	0	0	0	0	0	0	0	0	0	0	0	0	0	0	0	0
45	6	2018-05-28		0	0	1	0	0	0	0	0	0	0	0	0	0	0	0	0	0	0	0	0	0	0	0	0	0	0	0	0	0	0	0	0	0	0	0	0	0	0	0	0	0	0	0	0	0	0
45	3	2018-05-30		0	1	0	0	0	0	0	0	0	0	0	0	0	0	0	0	0	0	0	0	0	0	0	0	0	0	0	0	0	0	0	0	0	0	0	0	0	0	0	1	0	0	0	0	0	0
45	4	2018-06-01		0	0	1	0	0	0	0	0	0	0	0	0	0	0	0	0	0	0	0	0	0	0	0	0	0	0	0	0	0	0	0	0	0	0	0	0	0	0	0	0	0	0	0	0	0	0
45	6	2018-06-04		0	4	0	0	1	0	0	0	0	0	1	0	0	0	0	0	0	0	0	0	0	0	0	0	0	0	0	0	0	0	0	0	0	0	0	0	0	0	0	2	0	0	0	0	0	0
45	3	2018-06-05		0	1	0	0	0	0	0	0	0	0	0	0	0	0	0	0	0	0	0	0	0	0	0	0	0	0	0	0	0	0	0	0	0	0	0	0	0	0	0	1	0	0	0	0	0	0
45	4	2018-06-09		0	1	0	0	0	0	0	0	0	0	1	0	0	0	0	0	0	0	0	0	0	0	0	0	0	0	0	0	0	0	0	0	0	0	0	0	0	0	0	0	0	0	0	0	0	0
45	16	2018-06-12		0	9	0	0	1	0	0	0	0	0	8	0	0	0	0	0	0	0	0	0	0	0	0	0	0	0	0	0	0	0	0	0	0	0	0	0	0	0	0	0	0	0	0	0	0	0
45	4	2018-06-16		0	1	0	0	0	0	0	0	0	0	0	0	0	0	0	0	0	0	0	0	0	0	0	0	0	0	0	0	0	0	0	0	0	0	0	0	0	0	0	1	0	0	0	0	0	0
45	76	2018-06-17		0	5	0	0	1	0	0	0	0	0	4	0	0	0	0	0	0	0	0	0	0	0	0	0	0	0	0	0	0	0	0	0	0	0	0	0	0	0	0	0	0	0	0	0	0	0
45	10	2018-07-10		0	0	1	0	0	0	0	0	0	0	0	0	0	0	0	0	0	0	0	0	0	0	0	0	0	0	0	0	0	0	0	0	0	0	0	0	0	0	0	0	0	0	0	0	0	0
45	12	2018-07-20		0	1	0	0	0	0	0	0	0	0	0	0	0	0	0	0	0	0	0	0	0	0	0	1	0	0	0	0	0	0	0	0	0	0	0	0	0	0	0	0	0	0	0	0	0	0
46	7	2018-04-06		0	1	0	0	0	0	0	0	0	0	0	0	0	0	0	0	0	0	0	0	0	0	0	0	0	0	0	0	0	0	0	0	0	0	0	0	0	0	0	0	0	0	0	0	0	0
46	5	2018-04-09		0	1	0	0	0	0	0	0	0	0	0	0	0	0	0	0	0	0	0	0	0	0	0	0	0	0	0	0	0	0	0	0	0	0	0	0	0	0	0	1	0	0	0	0	0	0
46		2018-04-10		0	1	0	0	0	0	0	0	0	0	0	0	0	0	0	0	0	0	0	0	0	0	0	0	0	0	0	0	0	0	0	0	0	0	1	0	0	0	0	0	0	0	0	0	0	0
46		2018-04-17		0	1	0	0	0	0	0	0	0	0	0	0	0	0	0	0	0	0	0	0	0	0	0	0	0	0	0	0	0	0	0	0	0	0	0	0	0	0	0	1	0	0	0	0	0	0
46	58	2018-04-25		0	2	0	0	0	0	0	0	0	0	1	0	0	0	0	0	0	0	0	0	0	0	0	0	0	0	0	0	0	0	0	0	0	0	0	0	0	0	1	0	0	0	0	0	0	0
46	4	2018-04-30		0	1	0	0	0	0	0	0	0	0	0	0	0	0	0	0	0	0	0	0	0	0	0	0	0	0	0	0	0	0	0	0	0	0	0	0	0	0	0	1	0	0	0	0	0	0
46	10	2018-05-02		0	1	0	1	0	0	0	0	0	0	0	0	0	0	0	0	0	0	0	0	0	0	0	0	0	0	0	0	0	0	0	0	0	0	0	0	0	0	0	0	0	0	0	0	0	0
46	58	2018-05-05		0	2	0	0	0	0	0	0	0	0	1	0	0	0	1	0	0	0	0	0	0	0	0	0	0	0	0	0	0	0	0	0	0	0	0	0	0	0	0	0	0	0	0	0	0	0
46	11	2018-05-25		0	2	0	0	0	0	0	0	0	0	0	0	0	0	0	0	1	0	0	0	0	0	0	0	0	0	0	0	0	0	0	0	0	0	1	0	0	0	0	0	0	0	0	0	0	0
46	8	2018-06-03		0	2	0	1	1	0	0	0	0	0	0	0	0	0	0	0	0	0	0	0	0	0	0	0	0	0	0	0	0	0	0	0	0	0	0	0	0	0	0	0	0	0	0	0	0	0
46		2018-06-05		1	0	0	0	0	0	0	0	0	0	0	0	0	0	0	0	0	0	0	0	0	0	0	0	0	0	0	0	0	0	0	0	0	0	0	0	0	0	0	0	0	0	0	0	0	0
46	17	2018-06-09		0	1	0	0	0	0	0	0	0	0	0	0	0	0	0	0	0	0	0	0	0	0	0	0	0	0	0	0	0	0	0	0	0	0	0	0	0	0	1	0	0	0	0	0	0	0
46	8	2018-06-14		0	1	0	0	0	0	0	0	0	0	0	0	0	0	0	0	0	0	0	0	0	0	0	0	0	0	0	0	0	0	0	0	0	0	0	0	0	0	0	1	0	0	0	0	0	0
46	13	2018-06-16		0	0	1	0	0	0	0	0	0	0	0	0	0	0	0	0	0	0	0	0	0	0	0	0	0	0	0	0	0	0	0	0	0	0	0	0	0	0	0	0	0	0	0	0	0	0
46	12	2018-06-19		0	1	0	0	0	0	0	0	0	0	0	0	0	0	0	0	0	0	0	0	0	0	0	0	0	0	0	0	0	0	0	0	0	0	0	0	0	0	1	0	0	0	0	0	0	0
46	11	2018-06-26		0	2	0	0	0	0	0	0	0	0	2	0	0	0	0	0	0	0	0	0	0	0	0	0	0	0	0	0	0	0	0	0	0	0	0	0	0	0	0	0	0	0	0	0	0	0
46	35	2018-07-02		0	3	0	1	0	0	0	0	0	0	1	0	0	0	0	0	0	0	0	0	0	0	0	0	0	0	0	0	0	0	0	0	0	0	0	0	0	0	0	0	0	0	0	0	0	0
46	10	2018-07-09		0	1	0	0	1	0	0	0	0	0	0	0	0	0	0	0	0	0	0	0	0	0	0	0	0	0	0	0	0	0	0	0	0	0	0	0	0	0	0	0	0	0	0	0	0	0
46	1	2018-07-19		0	2	0	1	0	0	0	0	0	0	0	0	0	0	0	0	0	0	0	0	0	1	0	0	0	0	0	0	0	0	0	0	0	0	0	0	0	0	0	0	0	0	0	0	0	0
46	8	2018-07-23		0	0	1	0	0	0	0	0	0	0	0	0	0	0	0	0	0	0	0	0	0	0	0	0	0	0	0	0	0	0	0	0	0	0	0	0	0	0	0	0	0	0	0	0	0	0
47		2018-04-06		0	0	1	0	0	0	0	0	0	0	0	0	0	0	0	0	0	0	0	0	0	0	0	0	0	0	0	0	0	0	0	0	0	0	0	0	0	0	0	0	0	0	0	0	0	0
47		2018-04-17		0	0	1	0	0	0	0	0	0	0	0	0	0	0	0	0	0	0	0	0	0	0	0	0	0	0	0	0	0	0	0	0	0	0	0	0	0	0	0	0	0	0	0	0	0	0
47	12	2018-04-21		0	3	0	0	0	0	0	0	1	0	2	0	0	0	0	0	0	0	0	0	0	0	0	0	0	0	0	0	0	0	0	0	0	0	0	0	0	0	0	0	0	0	0	0	0	0
47	4	2018-04-25		0	1	0	0	0	0	0	0	0	0	1	0	0	0	0	0	0	0	0	0	0	0	0	0	0	0	0	0	0	0	0	0	0	0	0	0	0	0	0	0	0	0	0	0	0	0
47	9	2018-04-27		0	1	0	0	0	0	0	0	0	0	0	0	0	0	0	0	0	0	0	0	0	0	0	0	0	1	0	0	0	0	0	0	0	0	0	0	0	0	0	0	0	0	0	0	0	0
47	4	2018-04-28		0	1	0	0	0	0	0	0	0	0	0	0	0	0	0	0	0	0	0	0	0	0	0	0	0	0	0	0	1	0	0	0	0	0	0	0	0	0	0	0	0	0	0	0	0	0
47	11	2018-05-03		0	1	0	0	0	0	0	0	0	0	0	0	0	0	0	0	0	0	0	0	0	0	0	0	0	0	0	0	1	0	0	0	0	0	0	0	0	0	0	0	0	0	0	0	0	0
47	10	2018-05-06		0	1	0	1	0	0	0	0	0	0	0	0	0	0	0	0	0	0	0	0	0	0	0	0	0	0	0	0	0	0	0	0	0	0	0	0	0	0	0	0	0	0	0	0	0	0
47	7	2018-05-12		0	1	0	0	0	0	0	0	0	0	0	0	0	0	0	0	0	0	0	0	0	0	0	0	0	0	0	0	0	0	1	0	0	0	0	0	0	0	0	0	0	0	0	0	0	0
47	7	2018-05-13		0	1	0	0	0	0	0	0	0	0	0	0	0	0	0	0	0	0	0	0	0	0	0	0	0	0	0	0	0	0	0	0	0	0	0	0	0	0	0	0	0	0	0	0	1	0
47	10	2018-05-18		0	1	0	0	0	0	0	0	0	0	0	0	0	0	0	0	0	0	0	0	0	0	0	0	0	0	0	0	0	0	0	0	0	0	0	0	0	0	1	0	0	0	0	0	0	0
47	5	2018-05-24		0	1	0	0	0	0	0	0	0	0	0	0	0	0	0	0	0	0	0	0	0	0	0	0	0	0	0	0	0	0	1	0	0	0	0	0	0	0	0	0	0	0	0	0	0	0
47	4	2018-05-28		0	1	0	0	0	0	0	0	0	0	0	0	0	0	0	0	0	0	0	0	0	0	0	0	0	0	0	0	0	0	1	0	0	0	0	0	0	0	0	0	0	0	0	0	0	0
47	10	2018-05-29		0	1	0	0	0	0	0	0	0	0	0	0	0	0	0	0	0	0	0	0	0	0	0	0	0	0	0	0	0	0	0	0	0	0	0	0	0	0	0	0	0	0	0	0	1	0
47	10	2018-05-30		0	1	0	0	0	0	0	0	0	0	0	0	0	0	0	0	0	0	0	0	0	0	0	0	0	0	0	0	1	0	0	0	0	0	0	0	0	0	0	0	0	0	0	0	0	0
47	9.5	2018-05-31		0	1	0	1	0	0	0	0	0	0	0	0	0	0	0	0	0	0	0	0	0	0	0	0	0	0	0	0	0	0	0	0	0	0	0	0	0	0	0	0	0	0	0	0	0	0
47	9	2018-06-11		0	1	0	0	0	0	0	0	0	0	0	0	0	0	0	0	0	0	0	0	0	0	0	0	0	0	0	0	0	0	1	0	0	0	0	0	0	0	0	0	0	0	0	0	0	0
47	10	2018-06-12		0	1	0	0	0	0	0	0	0	0	1	0	0	0	0	0	0	0	0	0	0	0	0	0	0	0	0	0	0	0	0	0	0	0	0	0	0	0	0	0	0	0	0	0	0	0
47	11	2018-06-22		0	1	0	0	0	0	0	0	0	0	0	0	0	0	0	0	0	0	0	0	0	0	0	0	0	0	0	0	0	0	1	0	0	0	0	0	0	0	0	0	0	0	0	0	0	0
47	8	2018-06-23		0	1	0	0	0	0	0	0	0	0	0	0	0	0	0	0	0	0	0	0	0	0	0	0	0	0	0	0	0	0	1	0	0	0	0	0	0	0	0	0	0	0	0	0	0	0
47	8	2018-06-28		0	1	0	0	0	0	0	0	0	0	1	0	0	0	0	0	0	0	0	0	0	0	0	0	0	0	0	0	0	0	0	0	0	0	0	0	0	0	0	0	0	0	0	0	0	0
47	9	2018-07-01		0	1	0	0	0	0	0	0	0	0	0	0	0	0	0	0	0	0	0	0	0	0	0	0	0	0	0	0	0	0	1	0	0	0	0	0	0	0	0	0	0	0	0	0	0	0
47	12	2018-07-05		0	1	0	0	0	0	0	0	0	0	0	0	0	0	0	0	0	0	0	0	0	0	0	0	0	1	0	0	0	0	0	0	0	0	0	0	0	0	0	0	0	0	0	0	0	0
47	8	2018-07-12		0	1	0	0	0	0	0	0	0	0	0	0	0	0	0	0	0	0	0	0	0	1	0	0	0	0	0	0	0	0	0	0	0	0	0	0	0	0	0	0	0	0	0	0	0	0
47	10	2018-07-21		0	1	0	0	0	0	0	0	0	0	0	0	0	0	0	0	0	0	0	0	0	0	0	0	0	0	0	0	0	0	1	0	0	0	0	0	0	0	0	0	0	0	0	0	0	0
48	4	2018-10-18		0	1	0	0	0	0	0	0	0	0	0	0	0	0	0	0	0	0	0	0	0	0	0	0	0	0	0	0	0	0	0	0	0	0	0	0	0	0	0	1	0	0	0	0	0	0
48	9	2018-10-19		0	0	1	0	0	0	0	0	0	0	0	0	0	0	0	0	0	0	0	0	0	0	0	0	0	0	0	0	0	0	0	0	0	0	0	0	0	0	0	0	0	0	0	0	0	0
48	8	2018-10-27		0	0	1	0	0	0	0	0	0	0	0	0	0	0	0	0	0	0	0	0	0	0	0	0	0	0	0	0	0	0	0	0	0	0	0	0	0	0	0	0	0	0	0	0	0	0
48	5	2018-11-03		0	0	1	0	0	0	0	0	0	0	0	0	0	0	0	0	0	0	0	0	0	0	0	0	0	0	0	0	0	0	0	0	0	0	0	0	0	0	0	0	0	0	0	0	0	0
48	7	2018-11-07		0	3	0	0	0	0	0	0	0	0	0	0	0	0	0	0	0	0	0	0	0	0	0	0	0	1	0	0	0	0	0	0	0	0	1	0	0	0	0	0	0	0	0	0	0	1
48	2	2018-11-11		0	2	0	0	0	0	0	0	0	0	0	0	0	0	0	0	0	0	0	0	0	0	0	0	0	0	0	0	0	0	0	0	0	0	0	0	0	0	0	1	0	0	0	1	0	0
48	8	2018-11-13		0	2	0	0	1	0	0	0	0	0	0	0	0	0	0	0	0	0	0	0	0	0	0	0	0	1	0	0	0	0	0	0	0	0	0	0	0	0	0	0	0	0	0	0	0	0
48	125	2018-11-21		0	3	0	0	0	0	0	0	0	0	0	1	0	0	0	0	0	0	0	0	0	0	0	0	0	0	0	0	0	0	0	0	0	0	0	0	0	0	0	0	0	0	0	0	0	1
48	4	2018-12-08		0	1	0	0	0	0	0	0	0	0	0	0	0	0	0	0	0	0	0	0	0	0	0	0	0	0	0	0	0	0	0	0	0	0	0	0	0	0	0	0	0	0	0	0	0	0
48	4	2018-12-18		0	2	0	0	0	0	0	0	0	0	0	0	0	0	0	0	0	0	0	0	1	0	0	0	0	0	0	0	0	0	0	0	0	0	0	0	0	0	0	1	0	0	0	0	0	0
48	9	2018-12-21		0	1	0	0	0	0	0	0	0	0	0	0	0	0	0	0	0	0	0	0	0	0	0	0	0	0	0	0	0	0	0	0	0	0	1	0	0	0	0	0	0	0	0	0	0	0
48	51	2018-12-28		0	1	0	1	0	0	0	0	0	0	0	0	0	0	0	0	0	0	0	0	0	0	0	0	0	0	0	0	0	0	0	0	0	0	0	0	0	0	0	0	0	0	0	0	0	0
48	4	2019-01-02		0	2	0	0	0	0	0	0	0	0	0	0	0	0	0	0	0	0	0	0	0	0	0	0	0	0	0	0	0	0	0	0	0	0	0	0	0	0	0	1	0	0	0	0	0	0
48	58	2019-01-04		0	3	0	0	1	0	0	0	0	0	1	0	0	0	0	0	0	0	0	0	0	0	0	0	0	0	0	0	0	0	0	0	0	0	0	0	0	0	0	0	0	0	1	0	0	0
48	18	2019-01-14		0	0	1	0	0	0	0	0	0	0	0	0	0	0	0	0	0	0	0	0	0	0	0	0	0	0	0	0	0	0	0	0	0	0	0	0	0	0	0	0	0	0	0	0	0	0
48	12	2019-01-17		0	1	0	0	0	0	0	0	0	0	1	0	0	0	0	0	0	0	0	0	0	0	0	0	0	0	0	0	0	0	0	0	0	0	0	0	0	0	0	0	0	0	0	0	0	0
48	10	2019-01-19		0	1	0	1	0	0	0	0	0	0	0	0	0	0	0	0	0	0	0	0	0	0	0	0	0	0	0	0	0	0	0	0	0	0	0	0	0	0	0	0	0	0	0	0	0	0
48	10	2019-01-20		0	2	0	0	0	0	0	0	0	0	0	0	0	0	0	0	0	0	0	0	0	0	0	1	0	1	0	0	0	0	0	0	0	0	0	0	0	0	0	0	0	0	0	0	0	0
48	13	2019-01-25		0	1	0	0	0	0	1	0	0	0	0	0	0	0	0	0	0	0	0	0	0	0	0	0	0	0	0	0	0	0	0	0	0	0	0	0	0	0	0	0	0	0	0	0	0	0
48	10	2019-01-27		0	0	1	0	0	0	0	0	0	0	0	0	0	0	0	0	0	0	0	0	0	0	0	0	0	0	0	0	0	0	0	0	0	0	0	0	0	0	0	0	0	0	0	0	0	0
48	24	2019-01-29		0	3	0	0	1	0	0	0	0	0	1	0	0	0	0	0	0	0	0	0	0	0	0	0	0	0	0	0	0	0	0	1	0	0	0	0	0	0	0	0	0	0	0	0	0	0
48	9	2019-02-01		0	0	1	0	0	0	0	0	0	0	0	0	0	0	0	0	0	0	0	0	0	0	0	0	0	0	0	0	0	0	0	0	0	0	0	0	0	0	0	0	0	0	0	0	0	0
48	13	2019-02-03		0	2	0	0	0	0	0	0	0	0	1	0	0	0	0	0	0	0	0	1	0	0	0	0	0	0	0	0	0	0	0	0	0	0	0	0	0	0	0	0	0	0	0	0	0	0
48	9	2019-02-04		0	0	1	0	0	0	0	0	0	0	0	0	0	0	0	0	0	0	0	0	0	0	0	0	0	0	0	0	0	0	0	0	0	0	0	0	0	0	0	0	0	0	0	0	0	0
48	6	2019-02-05		0	2	0	0	0	0	1	0	0	0	0	0	0	0	0	0	0	0	0	0	0	0	0	0	0	1	0	0	0	0	0	0	0	0	0	0	0	0	0	0	0	0	0	0	0	0
48	42	2019-02-08		0	1	0	0	0	0	0	0	0	0	0	0	1	0	0	0	0	0	0	0	0	0	0	0	0	0	0	0	0	0	0	0	0	0	0	0	0	0	0	0	0	0	0	0	0	0
48	12	2019-02-15		0	0	1	0	0	0	0	0	0	0	0	0	0	0	0	0	0	0	0	0	0	0	0	0	0	0	0	0	0	0	0	0	0	0	0	0	0	0	0	0	0	0	0	0	0	0
48	5	2019-02-18		0	1	0	0	1	0	0	0	0	0	0	0	0	0	0	0	0	0	0	0	0	0	0	0	0	0	0	0	0	0	0	0	0	0	0	0	0	0	0	0	0	0	0	0	0	0
48	13	2019-02-19		0	4	0	1	0	0	0	0	0	0	1	0	0	0	0	0	0	0	0	0	0	0	0	0	0	0	0	0	0	0	1	0	1	0	0	0	0	0	0	0	0	0	0	0	0	0
48	12	2019-02-22		0	2	0	0	0	0	0	0	0	0	0	0	0	1	0	0	0	0	0	0	0	0	0	0	0	1	0	0	0	0	0	0	0	0	0	0	0	0	0	0	0	0	0	0	0	0
48	6	2019-02-24		0	1	0	0	0	0	0	0	0	0	0	0	0	0	0	0	0	0	0	0	0	0	0	0	0	0	0	0	0	0	0	0	0	0	1	0	0	0	0	0	0	0	0	0	0	0
48	7	2019-02-25		0	0	1	0	0	0	0	0	0	0	0	0	0	0	0	0	0	0	0	0	0	0	0	0	0	0	0	0	0	0	0	0	0	0	0	0	0	0	0	0	0	0	0	0	0	0
48	16	2019-02-26		0	1	0	1	0	0	0	0	0	0	0	0	0	0	0	0	0	0	0	0	0	0	0	0	0	0	0	0	0	0	0	0	0	0	0	0	0	0	0	0	0	0	0	0	0	0
48	8.5	2018-03-22		0	2	0	0	0	0	0	0	0	0	0	0	0	0	0	0	0	0	0	0	0	0	0	0	0	2	0	0	0	0	0	0	0	0	0	0	0	0	0	0	0	0	0	0	0	0
48	8	2018-03-24		0	1	0	0	0	0	0	0	0	0	1	0	0	0	0	0	0	0	0	0	0	0	0	0	0	0	0	0	0	0	0	0	0	0	0	0	0	0	0	0	0	0	0	0	0	0
48	9.5	2018-03-26		0	1	0	0	0	0	0	0	1	0	0	0	0	0	0	0	0	0	0	0	0	0	0	0	0	0	0	0	0	0	0	0	0	0	0	0	0	0	0	0	0	0	0	0	0	0
48		2018-03-31		0	2	0	0	0	0	0	0	1	0	0	0	0	0	0	0	0	0	0	0	0	0	0	0	0	0	0	0	0	0	0	0	0	0	0	0	0	0	0	0	0	0	0	0	0	0
48	9	2018-04-01		0	1	0	0	0	0	0	0	0	0	1	0	0	0	0	0	0	0	0	0	0	0	0	0	0	0	0	0	0	0	0	0	0	0	0	0	0	0	0	0	0	0	0	0	0	0
48	6	2018-04-05		0	1	0	0	0	0	0	0	0	0	0	0	0	0	0	0	0	0	0	0	0	0	0	0	0	0	0	0	0	0	0	0	0	0	0	0	0	0	0	0	0	0	0	0	0	0
48	9.5	2018-04-08		0	0	1	0	0	0	0	0	0	0	0	0	0	0	0	0	0	0	0	0	0	0	0	0	0	0	0	0	0	0	0	0	0	0	0	0	0	0	0	0	0	0	0	0	0	0
48		2018-04-10		0	1	0	0	0	0	0	0	0	0	0	0	0	0	0	0	0	0	0	0	0	0	0	0	0	0	0	0	0	0	0	0	0	0	0	0	0	0	0	0	0	0	0	0	0	0
48	4	2018-04-15		0	0	1	0	0	0	0	0	0	0	0	0	0	0	0	0	0	0	0	0	0	0	0	0	0	0	0	0	0	0	0	0	0	0	0	0	0	0	0	0	0	0	0	0	0	0
48		2018-04-16		0	1	0	0	0	0	0	0	0	0	0	0	0	0	0	0	0	0	0	0	0	0	0	0	0	0	0	0	0	0	0	0	0	0	0	0	0	0	0	0	0	0	0	0	0	0
48		2018-04-18		0	2	0	0	0	0	0	0	1	0	1	0	0	0	0	0	0	0	0	0	0	0	0	0	0	0	0	0	0	0	0	0	0	0	0	0	0	0	0	0	0	0	0	0	0	0
48	9	2018-04-20		0	1	0	0	0	0	0	1	0	0	0	0	0	0	0	0	0	0	0	0	0	0	0	0	0	0	0	0	0	0	0	0	0	0	0	0	0	0	0	0	0	0	0	0	0	0
48	4	2018-04-22		0	2	0	0	0	0	0	0	0	0	0	0	0	0	0	0	0	0	0	0	0	0	0	0	0	0	0	0	0	0	0	0	0	0	0	0	0	0	0	2	0	0	0	0	0	0
48	9	2018-04-23		0	3	0	0	0	0	0	0	1	0	2	0	0	0	0	0	0	0	0	0	0	0	0	0	0	0	0	0	0	0	0	0	0	0	0	0	0	0	0	0	0	0	0	0	0	0
48	9	2018-04-24		0	0	1	0	0	0	0	0	0	0	0	0	0	0	0	0	0	0	0	0	0	0	0	0	0	0	0	0	0	0	0	0	0	0	0	0	0	0	0	0	0	0	0	0	0	0
48	8	2018-04-25		0	1	0	0	0	0	0	0	0	0	0	0	0	0	0	0	0	0	0	0	0	0	0	0	0	0	0	0	0	0	0	0	0	0	0	0	0	0	0	0	0	0	0	0	0	0
48	11	2018-04-28		0	1	0	0	0	0	0	0	0	0	0	0	0	0	0	0	0	0	0	0	0	0	0	1	0	0	0	0	0	0	0	0	0	0	0	0	0	0	0	0	0	0	0	0	0	0
48	9	2018-04-30		0	2	0	0	0	0	0	0	0	0	0	0	0	0	0	0	0	0	0	1	0	0	0	0	0	0	0	0	0	0	0	0	0	0	0	0	0	0	0	0	0	0	0	0	0	0
48	11	2018-05-02		0	2	0	0	0	0	0	0	0	0	0	0	0	0	0	0	0	0	0	0	0	0	0	0	0	0	0	0	0	0	0	0	0	0	0	0	0	0	2	0	0	0	0	0	0	0
48	4	2018-05-03		0	1	0	0	0	0	0	0	0	0	0	0	0	0	0	0	0	0	0	0	0	0	0	0	0	0	0	0	0	0	0	0	0	0	0	0	0	0	0	1	0	0	0	0	0	0
48	10	2018-05-05		0	2	0	0	0	0	0	0	0	0	0	0	0	0	0	0	1	0	0	0	0	0	0	0	0	0	0	0	0	0	0	0	0	0	1	0	0	0	0	0	0	0	0	0	0	0
48	8	2018-05-07		0	0	1	0	0	0	0	0	0	0	0	0	0	0	0	0	0	0	0	0	0	0	0	0	0	0	0	0	0	0	0	0	0	0	0	0	0	0	0	0	0	0	0	0	0	0
48	11	2018-05-09		0	2	0	0	0	0	0	1	0	0	0	0	0	0	0	0	0	0	0	0	0	1	0	0	0	0	0	0	0	0	0	0	0	0	0	0	0	0	0	0	0	0	0	0	0	0
48	9	2018-05-12		0	2	0	0	1	0	0	0	0	0	0	0	0	0	0	0	0	0	0	0	0	0	0	0	0	0	0	0	0	0	0	0	0	0	0	0	0	0	0	0	0	0	0	0	0	0
48	8	2018-05-17		0	2	0	1	0	0	0	0	0	0	0	0	0	0	0	0	0	0	0	0	0	0	0	0	0	0	0	0	0	0	0	0	0	0	0	0	0	0	0	0	0	0	0	0	1	0
48	8	2018-05-19		0	2	0	0	0	0	0	0	0	0	0	0	0	0	0	0	0	0	0	0	0	0	0	0	0	0	0	0	0	0	0	0	0	0	0	0	0	0	0	0	0	1	0	0	0	1
48	10.5	2018-05-22		0	2	0	1	1	0	0	0	0	0	0	0	0	0	0	0	0	0	0	0	0	0	0	0	0	0	0	0	0	0	0	0	0	0	0	0	0	0	0	0	0	0	0	0	0	0
48	3.5	2018-05-25		0	1	0	0	0	0	0	0	0	0	0	0	0	0	0	0	0	0	0	0	0	0	0	0	0	0	0	0	0	0	0	0	0	0	0	0	0	0	0	1	0	0	0	0	0	0
48	5	2018-05-29		0	2	0	0	0	0	0	0	0	0	1	0	0	0	0	0	0	0	0	0	0	0	0	1	0	0	0	0	0	0	0	0	0	0	0	0	0	0	0	0	0	0	0	0	0	0
48	10	2018-05-30		0	1	0	0	0	0	0	0	0	0	0	0	0	0	0	0	0	0	0	0	0	0	0	0	0	0	0	0	1	0	0	0	0	0	0	0	0	0	0	0	0	0	0	0	0	0
48	11.5	2018-06-01		0	2	0	0	1	0	0	0	0	0	0	0	0	0	0	0	0	0	0	0	0	0	0	0	0	0	0	0	0	0	0	0	0	0	1	0	0	0	0	0	0	0	0	0	0	0
48	6	2018-06-05		0	1	0	0	0	0	0	0	0	0	0	0	0	0	0	0	0	0	0	0	0	0	0	1	0	0	0	0	0	0	0	0	0	0	0	0	0	0	0	0	0	0	0	0	0	0
48	11	2018-06-08		0	2	0	0	0	0	0	0	0	0	0	0	0	0	0	0	0	1	0	0	0	0	0	0	0	0	0	0	0	0	0	0	0	0	0	0	0	0	0	0	0	0	0	0	0	0
48	9	2018-06-12		0	0	1	0	0	0	0	0	0	0	0	0	0	0	0	0	0	0	0	0	0	0	0	0	0	0	0	0	0	0	0	0	0	0	0	0	0	0	0	0	0	0	0	0	0	0
48	9	2018-06-16		0	0	1	0	0	0	0	0	0	0	0	0	0	0	0	0	0	0	0	0	0	0	0	0	0	0	0	0	0	0	0	0	0	0	0	0	0	0	0	0	0	0	0	0	0	0
48	10	2018-06-21		0	2	0	0	0	0	0	0	0	0	2	0	0	0	0	0	0	0	0	0	0	0	0	0	0	0	0	0	0	0	0	0	0	0	0	0	0	0	0	0	0	0	0	0	0	0
48	9	2018-06-25		0	2	0	1	0	0	0	0	0	0	0	0	0	0	1	0	0	0	0	0	0	0	0	0	0	0	0	0	0	0	0	0	0	0	0	0	0	0	0	0	0	0	0	0	0	0
48	10	2018-06-28		0	1	0	0	0	0	0	0	0	0	0	0	0	0	0	0	0	0	0	0	0	0	0	0	0	0	0	0	0	0	0	0	0	0	1	0	0	0	0	0	0	0	0	0	0	0
48	6	2018-07-02		0	2	0	0	0	0	0	0	0	0	0	0	0	0	0	0	0	0	0	0	0	0	0	0	0	0	0	0	0	0	1	0	0	0	0	0	0	0	1	0	0	0	0	0	0	0
48	7	2018-07-05		0	3	0	0	0	0	0	0	0	1	0	0	0	0	0	0	0	0	0	0	0	0	0	1	0	0	0	0	0	0	0	0	0	1	0	0	0	0	0	0	0	0	0	0	0	0
48	9	2018-07-07		0	0	1	0	0	0	0	0	0	0	0	0	0	0	0	0	0	0	0	0	0	0	0	0	0	0	0	0	0	0	0	0	0	0	0	0	0	0	0	0	0	0	0	0	0	0
48	6	2018-07-09		0	1	0	0	0	0	0	0	0	0	0	0	0	0	0	0	0	0	0	0	0	0	0	0	0	0	0	0	0	0	0	0	0	0	0	0	0	0	0	1	0	0	0	0	0	0
48	6	2018-07-19		0	0	1	0	0	0	0	0	0	0	0	0	0	0	0	0	0	0	0	0	0	0	0	0	0	0	0	0	0	0	0	0	0	0	0	0	0	0	0	0	0	0	0	0	0	0
48	5	2018-07-21		0	3	0	0	0	0	0	0	0	0	0	0	0	0	0	0	0	0	0	0	0	0	0	0	0	1	0	0	0	0	0	0	0	0	0	0	0	0	1	0	0	0	0	0	0	0
48	9	2018-07-23		0	1	0	0	0	0	0	0	0	0	0	0	0	0	0	0	0	0	0	0	0	0	0	0	0	0	0	0	0	0	0	0	0	0	0	0	0	0	0	1	0	0	0	0	0	0
48	5	2019-05-21		0	1	0	0	0	0	0	0	0	0	0	0	0	0	0	0	0	0	0	0	0	0	0	0	0	0	0	0	0	0	0	0	0	0	0	0	0	0	0	0	0	0	0	0	0	0
49	4	2018-03-11		0	1	0	0	0	0	0	0	0	0	0	0	0	0	0	0	0	0	0	0	0	0	0	0	0	0	0	0	0	0	0	0	0	0	0	0	0	0	0	1	0	0	0	0	0	0
49	2.5	2018-03-12		0	1	0	0	0	0	0	0	0	0	0	0	0	0	0	0	0	0	0	0	0	0	0	0	0	0	0	0	0	0	0	0	0	0	0	0	0	0	0	1	0	0	0	0	0	0
49	5	2018-03-14		0	0	1	0	0	0	0	0	0	0	0	0	0	0	0	0	0	0	0	0	0	0	0	0	0	0	0	0	0	0	0	0	0	0	0	0	0	0	0	0	0	0	0	0	0	0
49	8	2018-03-15		0	1	0	0	0	0	0	0	0	0	0	0	0	0	0	0	0	0	0	0	0	0	0	0	0	0	0	0	0	0	0	0	0	0	0	0	0	0	1	0	0	0	0	0	0	0
49	3	2018-03-17		0	1	0	0	0	0	0	0	0	0	0	0	0	0	0	0	0	0	0	0	0	0	0	0	0	0	0	0	0	0	0	0	0	0	0	0	0	0	0	1	0	0	0	0	0	0
49	4	2018-03-18		0	2	0	0	0	0	0	0	0	0	0	0	0	0	0	0	0	0	0	0	0	0	0	0	0	0	0	0	0	0	0	0	0	0	0	0	0	0	0	1	0	0	0	0	0	0
49	3	2018-03-19		0	0	1	0	0	0	0	0	0	0	0	0	0	0	0	0	0	0	0	0	0	0	0	0	0	0	0	0	0	0	0	0	0	0	0	0	0	0	0	0	0	0	0	0	0	0
49	4	2018-03-20		0	1	0	0	0	0	0	0	0	0	0	0	0	0	0	0	0	0	0	0	0	0	0	0	0	0	0	0	0	0	0	0	0	0	0	0	0	0	0	0	0	0	0	0	0	0
49	4.5	2018-03-21		0	3	0	0	0	0	0	0	0	0	0	0	0	0	0	0	0	0	0	0	0	0	0	0	0	0	0	0	0	0	0	0	0	0	0	0	0	0	0	1	0	0	0	0	0	0
49	2	2018-03-22		0	1	0	0	0	0	0	0	0	0	0	0	0	0	0	0	0	0	0	0	0	0	0	0	0	0	0	0	0	0	0	0	0	0	0	0	0	0	0	1	0	0	0	0	0	0
49	5	2018-03-24		0	1	0	0	0	0	0	0	0	0	0	0	0	0	0	0	0	0	0	0	0	0	0	0	0	0	0	0	0	0	0	0	0	0	0	0	0	0	1	0	0	0	0	0	0	0
49	4	2018-03-26		0	1	0	0	0	0	0	0	0	0	0	0	0	0	0	0	0	0	0	0	0	0	0	0	0	0	0	0	0	0	0	0	0	0	0	0	0	0	0	1	0	0	0	0	0	0
49	4	2018-03-28		0	2	0	0	0	0	0	0	0	0	0	0	0	0	0	0	0	0	0	0	0	0	0	0	0	0	0	0	0	0	0	0	0	0	0	0	0	0	0	0	0	1	0	0	0	0
49	4	2018-03-31		0	1	0	0	0	0	0	0	0	0	0	0	0	0	0	0	0	0	0	0	0	0	0	0	0	0	0	0	0	0	0	0	0	0	0	0	0	0	0	0	0	0	0	0	0	0
49	3	2018-04-01		0	2	0	0	0	0	0	0	0	0	0	0	0	0	0	0	0	0	0	0	0	0	0	0	0	0	0	0	0	0	0	0	0	0	0	0	0	0	0	1	0	0	0	0	0	0
49	3	2018-04-02		0	0	1	0	0	0	0	0	0	0	0	0	0	0	0	0	0	0	0	0	0	0	0	0	0	0	0	0	0	0	0	0	0	0	0	0	0	0	0	0	0	0	0	0	0	0
49	3	2018-04-03		0	0	1	0	0	0	0	0	0	0	0	0	0	0	0	0	0	0	0	0	0	0	0	0	0	0	0	0	0	0	0	0	0	0	0	0	0	0	0	0	0	0	0	0	0	0
49	3	2018-04-05		0	2	0	0	0	0	0	0	0	0	0	0	0	0	0	0	0	0	0	0	0	0	0	0	0	0	0	0	0	0	0	0	0	0	0	0	0	0	0	1	0	1	0	0	0	0
49	5	2018-04-07		0	1	0	0	0	0	0	0	0	0	0	0	0	0	0	0	0	0	0	0	0	0	0	0	0	0	0	0	0	0	0	0	0	0	0	0	0	0	0	1	0	0	0	0	0	0
49	4	2018-04-09		0	2	0	0	0	0	0	0	0	0	0	0	0	0	0	0	0	0	0	0	0	0	0	0	0	0	0	0	0	0	0	0	0	0	0	0	0	0	1	0	0	1	0	0	0	0
49	5	2018-04-14		0	1	0	0	0	0	0	0	0	0	0	0	0	0	0	0	0	0	0	0	0	0	0	0	0	0	0	0	0	0	0	0	0	0	0	0	0	0	0	0	0	1	0	0	0	0
49	3	2018-04-16		0	2	0	0	0	0	0	0	0	0	0	0	0	0	0	0	0	0	0	0	0	0	0	0	0	0	0	0	0	0	0	0	0	0	0	0	0	0	1	1	0	0	0	0	0	0
49		2018-04-17		0	0	1	0	0	0	0	0	0	0	0	0	0	0	0	0	0	0	0	0	0	0	0	0	0	0	0	0	0	0	0	0	0	0	0	0	0	0	0	0	0	0	0	0	0	0
49	3	2018-04-19		0	2	0	0	0	0	0	0	0	0	0	0	0	0	0	0	0	0	0	0	0	0	0	0	0	0	0	0	0	0	0	0	0	0	0	0	0	0	0	1	0	0	0	0	0	0
49	4	2018-04-20		0	2	0	0	0	0	0	0	0	0	0	0	0	0	0	0	0	0	0	0	0	0	0	0	0	0	0	0	0	0	0	0	0	0	0	0	0	0	0	1	0	0	0	0	0	0
49		2018-04-23		0	2	0	0	0	0	0	0	0	0	0	0	0	0	0	0	0	0	0	0	0	0	0	0	0	0	0	0	0	0	0	0	0	0	0	0	0	0	0	0	0	0	0	0	0	1
49	4.5	2018-04-24		0	0	1	0	0	0	0	0	0	0	0	0	0	0	0	0	0	0	0	0	0	0	0	0	0	0	0	0	0	0	0	0	0	0	0	0	0	0	0	0	0	0	0	0	0	0
49	5	2018-04-25		0	1	0	0	0	0	0	0	0	0	0	0	0	0	0	0	0	0	0	0	0	0	0	0	0	0	0	0	0	0	0	0	0	0	0	0	0	0	0	1	0	0	0	0	0	0
49	5	2018-04-28		0	0	1	0	0	0	0	0	0	0	0	0	0	0	0	0	0	0	0	0	0	0	0	0	0	0	0	0	0	0	0	0	0	0	0	0	0	0	0	0	0	0	0	0	0	0
49	3	2018-04-30		0	1	0	0	0	0	0	0	0	0	0	0	0	0	0	0	0	0	0	0	0	0	0	0	0	0	0	0	0	0	0	0	0	0	0	0	0	0	0	0	0	0	0	0	0	0
49	5	2018-05-04		0	2	0	0	0	0	0	0	0	0	0	0	0	0	0	0	0	0	0	0	0	0	0	0	0	0	0	0	0	0	0	0	0	0	0	0	0	0	0	0	0	1	0	0	0	0
49	5	2018-05-05		0	1	0	0	0	0	0	0	0	0	0	0	0	0	0	0	0	0	0	0	0	0	0	0	0	0	0	0	0	0	0	0	0	0	0	0	0	0	0	0	0	0	0	1	0	0
49	5	2018-05-07		0	1	0	0	0	0	0	0	0	0	0	0	0	0	0	0	0	0	0	0	0	0	0	0	0	0	0	0	0	0	0	0	0	0	0	0	0	0	0	1	0	0	0	0	0	0
49	7	2018-05-10		0	1	0	0	0	0	0	0	0	0	0	0	0	0	0	0	0	0	0	0	0	0	0	0	0	0	0	0	0	0	0	0	0	0	0	0	0	0	0	0	0	0	0	0	0	0
49	10	2018-05-11		0	3	0	0	0	0	0	0	0	0	0	0	0	0	0	0	0	0	0	0	0	0	0	0	0	0	0	0	1	0	0	0	0	0	0	0	0	0	1	0	0	0	0	0	0	0
49	4.5	2018-05-12		0	0	0	0	0	0	0	0	0	0	0	0	0	0	0	0	0	0	0	0	0	0	0	0	0	0	0	0	0	0	0	0	0	0	0	0	0	0	0	0	0	0	0	0	0	0
49	5	2018-05-16		0	2	0	0	0	0	0	0	0	0	0	0	0	0	0	0	0	0	1	0	0	0	0	0	0	0	0	0	0	0	0	0	0	0	0	0	0	0	0	1	0	0	0	0	0	0
49	3	2018-05-17		0	1	0	0	0	0	0	0	0	0	0	0	0	0	0	0	0	0	0	0	0	0	0	0	0	0	0	0	0	0	0	0	0	0	0	0	0	0	1	0	0	0	0	0	0	0
49	4	2018-05-21		0	2	0	0	0	0	0	0	0	0	0	0	0	0	0	0	0	0	0	0	0	0	0	0	0	0	0	0	0	0	0	0	0	0	0	0	0	0	0	0	0	0	0	0	0	0
49	4.5	2018-05-24		0	2	0	0	0	0	0	0	0	0	0	0	0	0	0	0	0	0	0	1	0	0	0	0	0	0	0	0	0	0	0	0	0	0	0	0	0	0	1	0	0	0	0	0	0	0
49	5	2018-05-26		0	1	0	0	0	0	0	0	0	0	0	0	0	0	0	0	0	0	0	0	0	0	0	0	0	1	0	0	0	0	0	0	0	0	0	0	0	0	0	0	0	0	0	0	0	0
49	4.5	2018-05-28		0	1	0	0	0	0	0	0	0	0	0	0	0	0	0	0	0	0	0	0	0	0	0	0	0	0	0	0	0	0	0	0	0	0	0	0	0	0	0	0	0	0	0	0	0	0
49	6	2018-05-30		0	2	0	0	0	0	0	0	0	0	0	0	0	0	0	0	0	1	0	0	0	0	0	0	0	0	0	0	0	0	0	0	0	0	0	0	0	0	0	0	0	0	0	0	0	0
49	5	2018-05-31		0	1	0	0	0	0	0	0	0	0	0	0	0	0	0	0	0	0	0	0	0	0	0	0	0	0	0	0	0	0	0	0	0	0	0	0	0	0	0	1	0	0	0	0	0	0
49	5	2018-06-03		0	1	0	0	0	0	0	0	0	0	0	0	0	0	0	0	0	0	0	0	0	0	0	0	0	0	0	0	0	0	0	0	0	0	0	0	0	0	0	1	0	0	0	0	0	0
49	4	2018-06-08		0	1	0	0	0	0	0	0	0	0	0	0	0	0	0	0	0	0	0	0	0	0	0	0	0	0	0	0	0	0	0	0	0	0	0	0	0	0	0	1	0	0	0	0	0	0
49	4	2018-06-10		0	2	0	0	0	0	0	0	0	0	0	0	0	0	0	0	0	0	0	0	0	0	0	0	0	0	0	0	0	0	0	0	0	0	0	0	0	0	0	1	0	0	0	0	0	0
50	6	2015-11-14		0	0	1	0	0	0	0	0	0	0	0	0	0	0	0	0	0	0	0	0	0	0	0	0	0	0	0	0	0	0	0	0	0	0	0	0	0	0	0	0	0	0	0	0	0	0
50	5	2015-11-18		0	0	1	0	0	0	0	0	0	0	0	0	0	0	0	0	0	0	0	0	0	0	0	0	0	0	0	0	0	0	0	0	0	0	0	0	0	0	0	0	0	0	0	0	0	0
50	5	2018-10-22		0	1	0	0	0	0	0	0	0	0	1	0	0	0	0	0	0	0	0	0	0	0	0	0	0	0	0	0	0	0	0	0	0	0	0	0	0	0	0	0	0	0	0	0	0	0
50	6	2018-10-28		0	1	0	1	0	0	0	0	0	0	0	0	0	0	0	0	0	0	0	0	0	0	0	0	0	0	0	0	0	0	0	0	0	0	0	0	0	0	0	0	0	0	0	0	0	0
50	5	2018-10-30		0	1	0	0	0	0	0	0	0	0	0	0	0	0	0	0	0	0	0	0	0	0	0	0	0	0	0	0	1	0	0	0	0	0	0	0	0	0	0	0	0	0	0	0	0	0
50	6	2018-11-08		0	1	0	0	0	0	0	0	0	0	0	0	0	0	0	0	0	0	0	0	0	0	0	0	0	0	0	0	0	0	0	0	0	0	0	0	0	0	0	0	0	0	0	0	0	0
50	3	2018-11-22		0	1	0	0	0	0	0	0	0	0	1	0	0	0	0	0	0	0	0	0	0	0	0	0	0	0	0	0	0	0	0	0	0	0	0	0	0	0	0	0	0	0	0	0	0	0
50	5	2018-11-27		0	0	1	0	0	0	0	0	0	0	0	0	0	0	0	0	0	0	0	0	0	0	0	0	0	0	0	0	0	0	0	0	0	0	0	0	0	0	0	0	0	0	0	0	0	0
50	5	2018-12-01		0	1	0	0	0	0	0	0	0	0	0	0	0	0	0	0	0	0	0	0	0	0	0	0	0	0	0	0	0	0	0	0	0	0	0	0	0	0	1	0	0	0	0	0	0	0
50	6	2018-12-05		0	1	0	0	0	0	0	0	0	0	0	0	0	0	0	0	0	0	0	0	0	0	0	0	0	0	0	0	0	0	0	0	0	0	0	0	0	0	0	1	0	0	0	0	0	0
50	6	2018-12-22		0	2	0	0	1	0	0	0	0	0	1	0	0	0	0	0	0	0	0	0	0	0	0	0	0	0	0	0	0	0	0	0	0	0	0	0	0	0	0	0	0	0	0	0	0	0
50	5	2018-12-27		0	1	0	0	0	0	0	0	0	0	0	0	0	0	0	0	0	0	0	0	0	0	0	0	0	0	0	0	0	0	0	0	0	0	0	0	0	0	0	1	0	0	0	0	0	0
50	7	2019-01-10		0	2	0	0	0	0	0	0	0	0	0	0	0	0	0	0	0	0	0	0	0	0	0	0	0	0	0	0	1	0	0	0	0	0	0	0	0	0	1	0	0	0	0	0	0	0
50	7	2019-01-14		0	2	0	0	1	0	0	0	0	0	0	0	1	0	0	0	0	0	0	0	0	0	0	0	0	0	0	0	0	0	0	0	0	0	0	0	0	0	0	0	0	0	0	0	0	0
50	7	2019-01-22		0	1	0	0	0	0	0	0	0	0	1	0	0	0	0	0	0	0	0	0	0	0	0	0	0	0	0	0	0	0	0	0	0	0	0	0	0	0	0	0	0	0	0	0	0	0
50	7	2019-02-01		0	0	1	0	0	0	0	0	0	0	0	0	0	0	0	0	0	0	0	0	0	0	0	0	0	0	0	0	0	0	0	0	0	0	0	0	0	0	0	0	0	0	0	0	0	0
50	6	2019-02-14		0	1	0	0	1	0	0	0	0	0	0	0	0	0	0	0	0	0	0	0	0	0	0	0	0	0	0	0	0	0	0	0	0	0	0	0	0	0	0	0	0	0	0	0	0	0
50	4	2019-02-23		0	1	0	0	0	0	0	0	0	0	0	0	0	0	0	0	0	0	0	0	0	0	0	0	0	0	0	0	0	0	0	0	0	0	0	0	0	0	0	0	0	0	0	0	0	0
51	8	2018-12-31		0	1	0	0	0	0	0	0	0	0	0	0	0	0	0	0	0	0	0	0	0	0	0	0	0	0	0	1	0	0	0	0	0	0	0	0	0	0	0	0	0	0	0	0	0	0
51	3	2019-01-04		0	1	0	0	0	0	0	0	0	0	0	0	0	0	0	0	0	1	0	0	0	0	0	0	0	0	0	0	0	0	0	0	0	0	0	0	0	0	0	0	0	0	0	0	0	0
51	8	2019-01-11		0	1	0	0	0	0	0	1	0	0	0	0	0	0	0	0	0	0	0	0	0	0	0	0	0	0	0	0	0	0	0	0	0	0	0	0	0	0	0	0	0	0	0	0	0	0
51	4	2019-01-16		0	1	0	0	0	0	0	0	0	0	0	0	0	0	0	0	0	0	0	0	0	0	0	0	0	0	0	0	0	0	0	0	0	0	0	0	0	0	0	0	0	0	0	0	1	0
51	9	2019-01-28		0	1	0	0	0	0	0	0	0	0	0	0	0	0	0	0	0	0	0	0	0	0	0	0	0	0	0	0	0	0	0	0	0	0	0	0	0	0	0	0	0	0	0	0	0	0
51	8	2019-02-03		0	1	0	0	0	0	0	0	0	0	0	0	0	0	0	0	0	0	0	0	0	0	0	0	0	0	0	0	0	0	1	0	0	0	0	0	0	0	0	0	0	0	0	0	0	0
51	6	2019-02-04		0	1	0	0	0	0	0	0	0	0	0	0	0	0	0	0	0	0	0	0	0	0	0	0	0	0	0	0	0	0	0	0	0	0	0	0	0	0	1	0	0	0	0	0	0	0
51	9	2019-02-05		0	1	0	0	1	0	0	0	0	0	0	0	0	0	0	0	0	0	0	0	0	0	0	0	0	0	0	0	0	0	0	0	0	0	0	0	0	0	0	0	0	0	0	0	0	0
51	4	2019-02-17		0	0	1	0	0	0	0	0	0	0	0	0	0	0	0	0	0	0	0	0	0	0	0	0	0	0	0	0	0	0	0	0	0	0	0	0	0	0	0	0	0	0	0	0	0	0
51	4	2019-02-19		0	0	1	0	0	0	0	0	0	0	0	0	0	0	0	0	0	0	0	0	0	0	0	0	0	0	0	0	0	0	0	0	0	0	0	0	0	0	0	0	0	0	0	0	0	0
51	9	2019-02-22		0	1	0	0	0	0	0	0	0	0	0	0	0	0	0	0	0	0	0	0	0	0	0	0	0	0	0	0	0	0	0	0	0	0	0	0	0	0	0	0	0	0	0	0	0	0
51	5	2019-02-24		0	0	1	0	0	0	0	0	0	0	0	0	0	0	0	0	0	0	0	0	0	0	0	0	0	0	0	0	0	0	0	0	0	0	0	0	0	0	0	0	0	0	0	0	0	0
51	12	2019-02-26		0	3	0	0	0	0	0	0	0	0	1	1	0	0	0	0	0	0	0	0	1	0	0	0	0	0	0	0	0	0	0	0	0	0	0	0	0	0	0	0	0	0	0	0	0	0
51	4	31/2/2019		0	1	0	0	0	0	0	0	0	0	0	0	0	0	0	0	0	0	0	0	0	0	0	0	0	0	0	0	0	0	0	0	0	0	0	0	0	0	0	0	0	0	0	0	0	0
52	55	2018-03-07		0	1	0	0	0	0	0	0	0	0	0	0	0	0	0	0	0	0	0	0	0	0	0	0	0	0	0	0	0	0	0	0	0	0	0	0	0	1	0	0	0	0	0	0	0	0
52	6	2018-03-11		0	0	1	0	0	0	0	0	0	0	0	0	0	0	0	0	0	0	0	0	0	0	0	0	0	0	0	0	0	0	0	0	0	0	0	0	0	0	0	0	0	0	0	0	0	0
52	5	2018-03-17		0	0	1	0	0	0	0	0	0	0	0	0	0	0	0	0	0	0	0	0	0	0	0	0	0	0	0	0	0	0	0	0	0	0	0	0	0	0	0	0	0	0	0	0	0	0
52	5	2018-03-20		0	1	0	0	0	0	0	0	0	0	1	0	0	0	0	0	0	0	0	0	0	0	0	0	0	0	0	0	0	0	0	0	0	0	0	0	0	0	0	0	0	0	0	0	0	0
52	8	2018-03-21		0	0	1	0	0	0	0	0	0	0	0	0	0	0	0	0	0	0	0	0	0	0	0	0	0	0	0	0	0	0	0	0	0	0	0	0	0	0	0	0	0	0	0	0	0	0
52	8	2018-03-27		0	0	1	0	0	0	0	0	0	0	0	0	0	0	0	0	0	0	0	0	0	0	0	0	0	0	0	0	0	0	0	0	0	0	0	0	0	0	0	0	0	0	0	0	0	0
52	7	2018-03-30		0	1	0	0	0	0	0	1	0	0	0	0	0	0	0	0	0	0	0	0	0	0	0	0	0	0	0	0	0	0	0	0	0	0	0	0	0	0	0	0	0	0	0	0	0	0
52		2018-04-06		0	0	1	0	0	0	0	0	0	0	0	0	0	0	0	0	0	0	0	0	0	0	0	0	0	0	0	0	0	0	0	0	0	0	0	0	0	0	0	0	0	0	0	0	0	0
52	6	2018-04-10		0	0	1	0	0	0	0	0	0	0	0	0	0	0	0	0	0	0	0	0	0	0	0	0	0	0	0	0	0	0	0	0	0	0	0	0	0	0	0	0	0	0	0	0	0	0
52	5	2018-04-15		0	0	1	0	0	0	0	0	0	0	0	0	0	0	0	0	0	0	0	0	0	0	0	0	0	0	0	0	0	0	0	0	0	0	0	0	0	0	0	0	0	0	0	0	0	0
52		2018-04-16		0	0	1	0	0	0	0	0	0	0	0	0	0	0	0	0	0	0	0	0	0	0	0	0	0	0	0	0	0	0	0	0	0	0	0	0	0	0	0	0	0	0	0	0	0	0
52	4	2018-04-19		0	0	1	0	0	0	0	0	0	0	0	0	0	0	0	0	0	0	0	0	0	0	0	0	0	0	0	0	0	0	0	0	0	0	0	0	0	0	0	0	0	0	0	0	0	0
52	4	2018-04-23		0	1	0	0	0	0	0	0	0	0	0	0	0	0	0	0	0	0	0	0	0	0	0	0	0	1	0	0	0	0	0	0	0	0	0	0	0	0	0	0	0	0	0	0	0	0
52	3.5	2018-04-25		0	1	0	0	0	0	0	0	1	0	0	0	0	0	0	0	0	0	0	0	0	0	0	0	0	0	0	0	0	0	0	0	0	0	0	0	0	0	0	0	0	0	0	0	0	0
52	6	2018-04-28		0	0	1	0	0	0	0	0	0	0	0	0	0	0	0	0	0	0	0	0	0	0	0	0	0	0	0	0	0	0	0	0	0	0	0	0	0	0	0	0	0	0	0	0	0	0
52	7.5	2018-05-01		0	0	1	0	0	0	0	0	0	0	0	0	0	0	0	0	0	0	0	0	0	0	0	0	0	0	0	0	0	0	0	0	0	0	0	0	0	0	0	0	0	0	0	0	0	0
52	3.5	2018-05-03		0	0	1	0	0	0	0	0	0	0	0	0	0	0	0	0	0	0	0	0	0	0	0	0	0	0	0	0	0	0	0	0	0	0	0	0	0	0	0	0	0	0	0	0	0	0
52	3.5	2018-05-05		0	0	1	0	0	0	0	0	0	0	0	0	0	0	0	0	0	0	0	0	0	0	0	0	0	0	0	0	0	0	0	0	0	0	0	0	0	0	0	0	0	0	0	0	0	0
52	4.5	2018-05-07		0	0	1	0	0	0	0	0	0	0	0	0	0	0	0	0	0	0	0	0	0	0	0	0	0	0	0	0	0	0	0	0	0	0	0	0	0	0	0	0	0	0	0	0	0	0
52	3	2018-05-09		0	0	1	0	0	0	0	0	0	0	0	0	0	0	0	0	0	0	0	0	0	0	0	0	0	0	0	0	0	0	0	0	0	0	0	0	0	0	0	0	0	0	0	0	0	0
52	2.5	2018-05-11		0	1	0	0	0	0	0	0	0	0	0	0	0	0	0	0	0	0	0	0	0	0	0	0	0	0	0	0	0	0	0	0	0	0	0	0	0	0	1	0	0	0	0	0	0	0
52	5	2018-05-13		0	0	1	0	0	0	0	0	0	0	0	0	0	0	0	0	0	0	0	0	0	0	0	0	0	0	0	0	0	0	0	0	0	0	0	0	0	0	0	0	0	0	0	0	0	0
52	4	2018-05-15		0	2	0	0	1	0	0	0	0	0	0	0	0	0	0	0	0	0	0	0	0	0	0	0	0	0	0	0	0	0	0	0	0	0	0	0	0	0	0	1	0	0	0	0	0	0
52	4	2018-05-17		0	0	1	0	0	0	0	0	0	0	0	0	0	0	0	0	0	0	0	0	0	0	0	0	0	0	0	0	0	0	0	0	0	0	0	0	0	0	0	0	0	0	0	0	0	0
52	3	2018-05-19		0	0	1	0	0	0	0	0	0	0	0	0	0	0	0	0	0	0	0	0	0	0	0	0	0	0	0	0	0	0	0	0	0	0	0	0	0	0	0	0	0	0	0	0	0	0
52	4.5	2018-05-21		0	0	1	0	0	0	0	0	0	0	0	0	0	0	0	0	0	0	0	0	0	0	0	0	0	0	0	0	0	0	0	0	0	0	0	0	0	0	0	0	0	0	0	0	0	0
52	3	2018-05-22		0	1	0	0	0	0	0	0	0	0	0	0	0	0	0	0	0	0	0	0	0	0	0	0	0	0	0	0	0	0	0	0	0	0	0	0	0	0	1	0	0	0	0	0	0	0
52	4	2018-05-23		0	0	1	0	0	0	0	0	0	0	0	0	0	0	0	0	0	0	0	0	0	0	0	0	0	0	0	0	0	0	0	0	0	0	0	0	0	0	0	0	0	0	0	0	0	0
52	4	2018-05-25		0	0	1	0	0	0	0	0	0	0	0	0	0	0	0	0	0	0	0	0	0	0	0	0	0	0	0	0	0	0	0	0	0	0	0	0	0	0	0	0	0	0	0	0	0	0
52	3	2018-05-26		0	1	0	0	0	0	0	0	0	0	0	0	1	0	0	0	0	0	0	0	0	0	0	0	0	0	0	0	0	0	0	0	0	0	0	0	0	0	0	0	0	0	0	0	0	0
52	3	2018-05-28		0	1	0	0	0	0	0	0	0	0	0	0	0	0	0	0	0	0	0	0	0	0	0	0	0	0	0	0	0	0	0	0	0	0	0	0	0	0	1	0	0	0	0	0	0	0
52	5	2018-05-30		0	1	0	1	0	0	0	0	0	0	0	0	0	0	0	0	0	0	0	0	0	0	0	0	0	0	0	0	0	0	0	0	0	0	0	0	0	0	0	0	0	0	0	0	0	0
52	4	2018-06-01		0	0	1	0	0	0	0	0	0	0	0	0	0	0	0	0	0	0	0	0	0	0	0	0	0	0	0	0	0	0	0	0	0	0	0	0	0	0	0	0	0	0	0	0	0	0
52	8	2018-06-10		0	0	0	0	0	0	0	0	0	0	0	0	0	0	0	0	0	0	0	0	0	0	0	0	0	0	0	0	0	0	0	0	0	0	0	0	0	0	0	0	0	0	0	0	0	0
52	7	2018-06-11		0	0	0	0	0	0	0	0	0	0	0	0	0	0	0	0	0	0	0	0	0	0	0	0	0	0	0	0	0	0	0	0	0	0	0	0	0	0	0	0	0	0	0	0	0	0
52	5	2018-06-17		0	1	0	0	0	0	0	0	0	0	1	0	0	0	0	0	0	0	0	0	0	0	0	0	0	0	0	0	0	0	0	0	0	0	0	0	0	0	0	0	0	0	0	0	0	0
52	5	2018-06-22		0	0	1	0	0	0	0	0	0	0	0	0	0	0	0	0	0	0	0	0	0	0	0	0	0	0	0	0	0	0	0	0	0	0	0	0	0	0	0	0	0	0	0	0	0	0
52	4	2018-06-25		0	1	0	0	1	0	0	0	0	0	0	0	0	0	0	0	0	0	0	0	0	0	0	0	0	0	0	0	0	0	0	0	0	0	0	0	0	0	0	0	0	0	0	0	0	0
52	3	2018-06-30		0	0	1	0	0	0	0	0	0	0	0	0	0	0	0	0	0	0	0	0	0	0	0	0	0	0	0	0	0	0	0	0	0	0	0	0	0	0	0	0	0	0	0	0	0	0
52	3	2018-07-07		0	0	1	0	0	0	0	0	0	0	0	0	0	0	0	0	0	0	0	0	0	0	0	0	0	0	0	0	0	0	0	0	0	0	0	0	0	0	0	0	0	0	0	0	0	0
52	4	2018-07-10		0	0	1	0	0	0	0	0	0	0	0	0	0	0	0	0	0	0	0	0	0	0	0	0	0	0	0	0	0	0	0	0	0	0	0	0	0	0	0	0	0	0	0	0	0	0
52	4	2018-07-18		0	1	0	1	0	0	0	0	0	0	0	0	0	0	0	0	0	0	0	0	0	0	0	0	0	0	0	0	0	0	0	0	0	0	0	0	0	0	0	0	0	0	0	0	0	0
53	10	2018-04-06		0	0	1	0	0	0	0	0	0	0	0	0	0	0	0	0	0	0	0	0	0	0	0	0	0	0	0	0	0	0	0	0	0	0	0	0	0	0	0	0	0	0	0	0	0	0
53	9	2018-05-02		0	1	0	0	0	0	0	0	0	0	0	0	0	0	0	0	0	0	0	0	0	0	0	0	0	0	0	0	0	0	0	0	0	0	0	0	0	0	1	0	0	0	0	0	0	0
53	7	2018-05-05		0	1	0	0	0	0	0	0	0	0	0	0	0	0	0	0	0	0	0	0	0	0	0	0	0	0	0	0	0	0	0	0	0	0	0	0	0	0	0	1	0	0	0	0	0	0
53	9	2018-05-11		0	1	0	0	0	0	0	0	0	0	0	0	0	0	0	0	0	0	0	0	0	0	0	0	0	0	0	0	0	0	0	0	0	0	0	0	0	0	1	0	0	0	0	0	0	0
53	10	2018-05-18		0	1	0	0	0	0	0	0	0	0	1	0	0	0	0	0	0	0	0	0	0	0	0	0	0	0	0	0	0	0	0	0	0	0	0	0	0	0	0	0	0	0	0	0	0	0
53	8	2018-05-22		0	1	0	0	0	0	0	0	0	0	0	0	0	0	0	0	0	0	0	0	0	0	0	0	0	0	0	0	0	0	0	0	0	0	0	0	0	0	1	0	0	0	0	0	0	0
53	10	2018-06-01		0	1	0	0	0	0	0	0	0	0	0	0	0	0	0	0	0	0	0	0	0	0	0	0	0	0	0	0	0	0	1	0	0	0	0	0	0	0	0	0	0	0	0	0	0	0
53	10	2018-06-10		0	1	0	0	1	0	0	0	0	0	0	0	0	0	0	0	0	0	0	0	0	0	0	0	0	0	0	0	0	0	0	0	0	0	0	0	0	0	0	0	0	0	0	0	0	0
53	3	2018-06-20		0	1	0	0	0	0	0	0	0	0	1	0	0	0	0	0	0	0	0	0	0	0	0	0	0	0	0	0	0	0	0	0	0	0	0	0	0	0	0	0	0	0	0	0	0	0
55	14	2018-10-26		0	1	0	0	0	0	0	0	0	0	0	0	0	0	0	0	0	0	0	0	0	0	0	0	0	0	0	0	0	0	1	0	0	0	0	0	0	0	0	0	0	0	0	0	0	0
55	9.5	2018-11-03		0	1	0	0	1	0	0	0	0	0	0	0	0	0	0	0	0	0	0	0	0	0	0	0	0	0	0	0	0	0	0	0	0	0	0	0	0	0	0	0	0	0	0	0	0	0
55	9	2018-11-08		0	1	0	1	0	0	0	0	0	0	0	0	0	0	0	0	0	0	0	0	0	0	0	0	0	0	0	0	0	0	0	0	0	0	0	0	0	0	0	0	0	0	0	0	0	0
55	4	2018-11-11		0	1	0	0	0	0	0	0	0	0	0	0	0	0	0	0	0	0	0	0	0	0	0	0	0	0	0	0	0	0	0	0	0	0	0	0	0	0	0	1	0	0	0	0	0	0
55	8	2018-11-12		0	0	1	0	0	0	0	0	0	0	0	0	0	0	0	0	0	0	0	0	0	0	0	0	0	0	0	0	0	0	0	0	0	0	0	0	0	0	0	0	0	0	0	0	0	0
55	9	2018-12-13		1	0	0	0	0	0	0	0	0	0	0	0	0	0	0	0	0	0	0	0	0	0	0	0	0	0	0	0	0	0	0	0	0	0	0	0	0	0	0	0	0	0	0	0	0	0
55	9	2018-12-14		1	0	0	0	0	0	0	0	0	0	0	0	0	0	0	0	0	0	0	0	0	0	0	0	0	0	0	0	0	0	0	0	0	0	0	0	0	0	0	0	0	0	0	0	0	0
55	30	2018-12-23		0	0	1	0	0	0	0	0	0	0	0	0	0	0	0	0	0	0	0	0	0	0	0	0	0	0	0	0	0	0	0	0	0	0	0	0	0	0	0	0	0	0	0	0	0	0
55	5	2019-01-04		0	0	1	0	0	0	0	0	0	0	0	0	0	0	0	0	0	0	0	0	0	0	0	0	0	0	0	0	0	0	0	0	0	0	0	0	0	0	0	0	0	0	0	0	0	0
55	32	2019-01-07		0	0	1	0	0	0	0	0	0	0	0	0	0	0	0	0	0	0	0	0	0	0	0	0	0	0	0	0	0	0	0	0	0	0	0	0	0	0	0	0	0	0	0	0	0	0
55	9	2019-01-11		0	1	0	0	0	0	0	0	0	0	0	0	1	0	0	0	0	0	0	0	0	0	0	0	0	0	0	0	0	0	0	0	0	0	0	0	0	0	0	0	0	0	0	0	0	0
55	7	2019-01-14		0	0	1	0	0	0	0	0	0	0	0	0	0	0	0	0	0	0	0	0	0	0	0	0	0	0	0	0	0	0	0	0	0	0	0	0	0	0	0	0	0	0	0	0	0	0
55	9	2019-01-17		0	0	1	0	0	0	0	0	0	0	0	0	0	0	0	0	0	0	0	0	0	0	0	0	0	0	0	0	0	0	0	0	0	0	0	0	0	0	0	0	0	0	0	0	0	0
55	7	2019-01-22		0	1	0	1	0	0	0	0	0	0	0	0	0	0	0	0	0	0	0	0	0	0	0	0	0	0	0	0	0	0	0	0	0	0	0	0	0	0	0	0	0	0	0	0	0	0
55	8	2019-01-26		0	1	0	0	1	0	0	0	0	0	0	0	0	0	0	0	0	0	0	0	0	0	0	0	0	0	0	0	0	0	0	0	0	0	0	0	0	0	0	0	0	0	0	0	0	0
55	10	2019-01-29		0	0	1	0	0	0	0	0	0	0	0	0	0	0	0	0	0	0	0	0	0	0	0	0	0	0	0	0	0	0	0	0	0	0	0	0	0	0	0	0	0	0	0	0	0	0
55	10	2019-01-30		1	0	0	0	0	0	0	0	0	0	0	0	0	0	0	0	0	0	0	0	0	0	0	0	0	0	0	0	0	0	0	0	0	0	0	0	0	0	0	0	0	0	0	0	0	0
55	48	2019-02-02		0	0	1	0	0	0	0	0	0	0	0	0	0	0	0	0	0	0	0	0	0	0	0	0	0	0	0	0	0	0	0	0	0	0	0	0	0	0	0	0	0	0	0	0	0	0
55	7	2019-02-05		0	2	0	0	1	0	0	0	0	0	1	0	0	0	0	0	0	0	0	0	0	0	0	0	0	0	0	0	0	0	0	0	0	0	0	0	0	0	0	0	0	0	0	0	0	0
55	8	2019-02-10		0	1	0	0	0	0	0	0	0	0	0	0	0	0	0	0	0	0	0	0	0	0	0	0	0	0	0	0	0	0	0	0	0	0	0	0	0	0	1	0	0	0	0	0	0	0
55	12	2019-02-12		0	1	0	0	0	0	0	0	0	0	0	1	0	0	0	0	0	0	0	0	0	0	0	0	0	0	0	0	0	0	0	0	0	0	0	0	0	0	0	0	0	0	0	0	0	0
55	12	2019-02-14		0	1	0	0	0	0	0	0	0	0	0	0	0	0	0	0	0	0	0	0	0	0	0	0	0	0	0	0	0	0	0	0	0	0	0	0	0	0	0	0	0	0	0	0	0	0
55	11	2019-02-22		0	1	0	0	0	0	0	0	0	0	0	0	0	0	0	0	0	0	0	0	0	0	0	0	0	0	0	0	0	0	0	0	0	0	0	0	0	0	1	0	0	0	0	0	0	0
55	11	2019-02-25		0	2	0	0	0	0	0	0	0	0	2	0	0	0	0	0	0	0	0	0	0	0	0	0	0	0	0	0	0	0	0	0	0	0	0	0	0	0	0	0	0	0	0	0	0	0
55		2019-02-26		0	0	1	0	0	0	0	0	0	0	0	0	0	0	0	0	0	0	0	0	0	0	0	0	0	0	0	0	0	0	0	0	0	0	0	0	0	0	0	0	0	0	0	0	0	0
56	5	2018-03-13		0	1	0	0	0	0	0	0	0	0	0	0	0	0	0	0	0	0	0	0	0	0	0	0	0	0	0	0	0	0	0	0	0	0	0	0	0	0	1	0	0	0	0	0	0	0
56	4	2018-03-14		0	0	1	0	0	0	0	0	0	0	0	0	0	0	0	0	0	0	0	0	0	0	0	0	0	0	0	0	0	0	0	0	0	0	0	0	0	0	0	0	0	0	0	0	0	0
56	6	2018-03-21		0	3	0	0	0	0	0	0	0	0	0	0	0	0	0	0	0	0	0	0	0	0	0	0	0	0	0	0	0	0	0	0	0	0	0	0	0	0	0	3	0	0	0	0	0	0
56	6	2018-03-26		0	1	0	0	0	0	0	0	0	0	0	0	0	0	0	0	0	0	0	0	0	0	0	0	0	0	0	0	0	0	0	0	0	0	0	0	0	0	1	0	0	0	0	0	0	0
56	7	2018-03-30		0	1	0	0	0	0	0	0	0	0	0	0	0	0	0	0	0	0	0	0	0	0	0	0	0	0	0	0	0	0	0	0	0	0	0	0	0	0	0	1	0	0	0	0	0	0
56	5	2018-03-31		0	2	0	0	0	0	0	0	0	0	0	0	0	0	0	0	0	0	0	0	0	0	0	0	0	0	0	0	0	0	0	0	0	0	0	0	0	0	1	1	0	0	0	0	0	0
56	11	2018-04-02		0	2	0	0	0	0	0	0	0	0	0	0	0	0	0	0	0	0	0	0	0	0	0	0	0	0	0	0	0	0	0	0	0	0	0	0	0	0	2	0	0	0	0	0	0	0
56	5.5	2018-04-10		0	1	0	0	0	0	0	0	0	0	0	0	0	0	0	0	0	0	0	0	0	0	0	0	0	0	0	0	0	0	0	0	0	0	0	0	0	0	0	1	0	0	0	0	0	0
56		2018-04-12		0	1	0	0	0	0	0	0	1	0	0	0	0	0	0	0	0	0	0	0	0	0	0	0	0	0	0	0	0	0	0	0	0	0	0	0	0	0	0	0	0	0	0	0	0	0
56	4	2018-04-17		0	2	0	0	0	0	0	0	0	0	0	0	0	0	0	0	0	0	0	0	0	0	0	0	0	0	0	0	0	0	0	0	0	0	0	0	0	0	0	2	0	0	0	0	0	0
56	7	2018-04-21		0	1	0	0	0	0	0	0	0	0	0	0	0	0	0	0	0	0	0	0	0	0	0	0	0	0	0	0	0	0	0	0	0	0	0	0	0	0	0	1	0	0	0	0	0	0
56	10	2018-04-30		0	1	0	0	0	0	0	0	0	0	0	0	0	0	0	0	0	0	0	0	0	0	0	0	0	0	0	0	0	0	0	0	0	0	0	0	0	0	0	1	0	0	0	0	0	0
56	8	2018-05-02		0	0	1	0	0	0	0	0	0	0	0	0	0	0	0	0	0	0	0	0	0	0	0	0	0	0	0	0	0	0	0	0	0	0	0	0	0	0	0	0	0	0	0	0	0	0
56	11	2018-05-10		0	1	0	0	0	0	0	0	0	0	0	0	0	0	0	0	0	0	0	0	0	0	0	0	0	0	0	0	0	0	0	0	0	0	0	0	0	0	1	0	0	0	0	0	0	0
56	10	2018-05-13		0	1	0	0	0	0	0	0	0	0	0	0	0	0	0	0	0	0	0	0	0	0	0	0	0	0	0	0	0	0	0	0	0	0	0	0	0	0	0	0	0	0	0	0	0	0
56	6	2018-05-21		0	1	0	1	0	0	0	0	0	0	0	0	0	0	0	0	0	0	0	0	0	0	0	0	0	0	0	0	0	0	0	0	0	0	0	0	0	0	0	0	0	0	0	0	0	0
56	11	2018-05-24		0	1	0	0	0	0	0	0	0	0	0	0	0	0	0	0	0	0	0	0	0	0	0	0	0	0	0	0	0	0	0	0	0	0	0	0	0	0	1	0	0	0	0	0	0	0
56	9	2018-05-27		0	1	0	0	0	0	0	0	0	0	0	0	0	0	0	0	0	0	0	0	0	0	0	0	0	0	0	0	0	0	0	0	0	0	0	0	0	0	0	1	0	0	0	0	0	0
56	8	2018-05-29		0	2	0	0	0	0	0	0	0	0	1	0	0	0	0	0	0	0	0	0	0	0	0	0	0	0	0	0	0	0	0	0	0	0	0	0	0	0	1	0	0	0	0	0	0	0
56	11	2018-06-01		0	2	0	0	0	0	0	0	0	0	0	0	0	0	0	0	0	0	0	0	0	0	0	0	0	0	0	0	0	0	0	0	0	0	0	0	0	0	1	1	0	0	0	0	0	0
56	11	2018-06-08		0	0	0	0	0	0	0	0	0	0	0	0	0	0	0	0	0	0	0	0	0	0	0	0	0	0	0	0	0	0	0	0	0	0	0	0	0	0	0	0	0	0	0	0	0	0
56	5	2018-06-11		0	2	0	0	0	0	0	0	0	0	0	0	0	0	0	0	0	0	0	0	0	0	0	0	0	0	0	0	0	0	0	0	0	0	0	0	0	0	1	1	0	0	0	0	0	0
56	7	2018-06-18		0	2	0	0	0	0	0	0	0	0	1	0	0	0	0	0	0	0	0	0	0	0	0	0	0	0	0	0	0	0	0	0	0	0	0	0	0	0	0	1	0	0	0	0	0	0
56	84	2018-06-21		0	4	0	2	0	0	0	0	0	0	1	0	0	0	0	0	0	0	0	0	0	1	0	0	0	0	0	0	0	0	0	0	0	0	0	0	0	0	0	0	0	0	0	0	0	0
56	147	2018-06-27		0	3	0	0	2	0	0	0	0	0	1	0	0	0	0	0	0	0	0	0	0	0	0	0	0	0	0	0	0	0	0	0	0	0	0	0	0	0	0	0	0	0	0	0	0	0
56	5	2018-07-07		0	1	0	1	0	0	0	0	0	0	0	0	0	0	0	0	0	0	0	0	0	0	0	0	0	0	0	0	0	0	0	0	0	0	0	0	0	0	0	0	0	0	0	0	0	0
56	107	2018-07-19		0	2	0	1	1	0	0	0	0	0	0	0	0	0	0	0	0	0	0	0	0	0	0	0	0	0	0	0	0	0	0	0	0	0	0	0	0	0	0	0	0	0	0	0	0	0
57	2	2018-03-08		0	1	0	0	0	0	0	0	0	0	1	0	0	0	0	0	0	0	0	0	0	0	0	0	0	0	0	0	0	0	0	0	0	0	0	0	0	0	0	0	0	0	0	0	0	0
57	6	2018-03-28		0	0	1	0	0	0	0	0	0	0	0	0	0	0	0	0	0	0	0	0	0	0	0	0	0	0	0	0	0	0	0	0	0	0	0	0	0	0	0	0	0	0	0	0	0	0
57	6.5	2018-04-05		0	0	1	0	0	0	0	0	0	0	0	0	0	0	0	0	0	0	0	0	0	0	0	0	0	0	0	0	0	0	0	0	0	0	0	0	0	0	0	0	0	0	0	0	0	0
57	4	2018-04-09		0	0	1	0	0	0	0	0	0	0	0	0	0	0	0	0	0	0	0	0	0	0	0	0	0	0	0	0	0	0	0	0	0	0	0	0	0	0	0	0	0	0	0	0	0	0
57	7	2018-04-11		0	1	0	0	0	0	0	0	0	0	1	0	0	0	0	0	0	0	0	0	0	0	0	0	0	0	0	0	0	0	0	0	0	0	0	0	0	0	0	0	0	0	0	0	0	0
57	5	2018-04-14		0	0	1	0	0	0	0	0	0	0	0	0	0	0	0	0	0	0	0	0	0	0	0	0	0	0	0	0	0	0	0	0	0	0	0	0	0	0	0	0	0	0	0	0	0	0
57	6	2018-04-17		0	1	0	0	0	0	0	0	0	0	0	0	0	0	0	0	0	0	0	0	0	0	0	0	0	1	0	0	0	0	0	0	0	0	0	0	0	0	0	0	0	0	0	0	0	0
57	2	2018-05-11		0	0	1	0	0	0	0	0	0	0	0	0	0	0	0	0	0	0	0	0	0	0	0	0	0	0	0	0	0	0	0	0	0	0	0	0	0	0	0	0	0	0	0	0	0	0
57	7	2018-05-16		0	0	1	0	0	0	0	0	0	0	0	0	0	0	0	0	0	0	0	0	0	0	0	0	0	0	0	0	0	0	0	0	0	0	0	0	0	0	0	0	0	0	0	0	0	0
57	6	2018-05-18		0	0	1	0	0	0	0	0	0	0	0	0	0	0	0	0	0	0	0	0	0	0	0	0	0	0	0	0	0	0	0	0	0	0	0	0	0	0	0	0	0	0	0	0	0	0
57	7	2018-05-21		0	1	0	1	0	0	0	0	0	0	0	0	0	0	0	0	0	0	0	0	0	0	0	0	0	0	0	0	0	0	0	0	0	0	0	0	0	0	0	0	0	0	0	0	0	0
57	4	2018-05-23		0	1	0	0	0	0	0	0	0	0	1	0	0	0	0	0	0	0	0	0	0	0	0	0	0	0	0	0	0	0	0	0	0	0	0	0	0	0	0	0	0	0	0	0	0	0
57	4	2018-05-24		0	1	0	0	0	0	0	0	0	0	0	0	0	0	0	0	0	0	0	0	0	0	0	0	0	0	0	0	0	0	0	0	0	0	0	0	0	0	0	1	0	0	0	0	0	0
57	2	2018-05-26		0	1	0	0	0	0	0	0	0	0	0	0	0	0	0	0	0	0	0	0	0	0	0	0	0	0	0	0	0	0	0	0	0	0	0	0	0	0	1	0	0	0	0	0	0	0
57	4	2018-05-29		0	1	0	0	0	0	0	0	0	0	0	0	0	0	0	0	0	0	0	0	0	0	0	0	0	0	0	0	0	0	0	0	0	0	0	0	0	0	0	0	0	0	0	0	0	0
57	5	2018-06-01		0	0	1	0	0	0	0	0	0	0	0	0	0	0	0	0	0	0	0	0	0	0	0	0	0	0	0	0	0	0	0	0	0	0	0	0	0	0	0	0	0	0	0	0	0	0
57	4	2018-06-03		0	0	1	0	0	0	0	0	0	0	0	0	0	0	0	0	0	0	0	0	0	0	0	0	0	0	0	0	0	0	0	0	0	0	0	0	0	0	0	0	0	0	0	0	0	0
57	4	2018-06-05		0	1	0	0	0	0	0	0	0	0	0	0	0	0	0	0	0	0	0	0	0	0	0	0	0	0	0	0	0	0	0	0	0	0	0	0	0	0	0	1	0	0	0	0	0	0
57		2018-06-05		0	1	0	0	0	0	0	0	0	0	0	0	0	0	0	0	0	0	0	0	0	0	0	0	0	0	0	0	0	0	0	0	0	0	0	0	0	0	0	1	0	0	0	0	0	0
57	4	2018-06-07		0	1	0	0	0	0	0	0	0	0	0	0	0	0	0	0	0	0	0	0	0	0	0	0	0	0	0	0	0	0	0	0	0	0	0	0	0	0	0	1	0	0	0	0	0	0
57	5	2018-06-10		0	0	0	0	0	0	0	0	0	0	0	0	0	0	0	0	0	0	0	0	0	0	0	0	0	0	0	0	0	0	0	0	0	0	0	0	0	0	0	0	0	0	0	0	0	0
57	4	2018-06-12		0	0	0	0	0	0	0	0	0	0	0	0	0	0	0	0	0	0	0	0	0	0	0	0	0	0	0	0	0	0	0	0	0	0	0	0	0	0	0	0	0	0	0	0	0	0
57	4	2018-06-16		0	0	0	0	0	0	0	0	0	0	0	0	0	0	0	0	0	0	0	0	0	0	0	0	0	0	0	0	0	0	0	0	0	0	0	0	0	0	0	0	0	0	0	0	0	0
57	6	2018-06-19		0	2	0	0	0	0	0	0	0	0	1	0	0	0	0	0	0	0	0	0	0	0	0	0	0	1	0	0	0	0	0	0	0	0	0	0	0	0	0	0	0	0	0	0	0	0
57	5	2018-06-22		0	0	1	0	0	0	0	0	0	0	0	0	0	0	0	0	0	0	0	0	0	0	0	0	0	0	0	0	0	0	0	0	0	0	0	0	0	0	0	0	0	0	0	0	0	0
57	4	2018-06-25		0	0	1	0	0	0	0	0	0	0	0	0	0	0	0	0	0	0	0	0	0	0	0	0	0	0	0	0	0	0	0	0	0	0	0	0	0	0	0	0	0	0	0	0	0	0
57	5	2018-06-28		0	1	0	0	1	0	0	0	0	0	0	0	0	0	0	0	0	0	0	0	0	0	0	0	0	0	0	0	0	0	0	0	0	0	0	0	0	0	0	0	0	0	0	0	0	0
57	5	2018-06-30		0	0	1	0	0	0	0	0	0	0	0	0	0	0	0	0	0	0	0	0	0	0	0	0	0	0	0	0	0	0	0	0	0	0	0	0	0	0	0	0	0	0	0	0	0	0
57	4	2018-07-07		0	2	0	0	0	0	0	0	0	0	0	0	0	0	0	0	0	0	0	0	0	0	0	0	0	0	0	0	0	0	0	0	0	0	0	0	0	0	0	2	0	0	0	0	0	0
57	4	2018-07-10		0	1	0	0	0	0	0	0	0	0	0	0	0	0	0	0	0	0	0	0	0	0	0	0	0	0	0	0	0	0	0	0	0	0	0	0	0	0	0	1	0	0	0	0	0	0
57	4	2018-07-21		0	3	0	0	0	0	0	0	0	0	0	0	0	0	0	0	0	0	0	0	0	0	0	0	0	0	0	0	0	0	0	0	0	0	0	0	0	0	0	3	0	0	0	0	0	0
57	8	2018-07-22		0	0	1	0	0	0	0	0	0	0	0	0	0	0	0	0	0	0	0	0	0	0	0	0	0	0	0	0	0	0	0	0	0	0	0	0	0	0	0	0	0	0	0	0	0	0
58	2	2018-04-23		0	0	1	0	0	0	0	0	0	0	0	0	0	0	0	0	0	0	0	0	0	0	0	0	0	0	0	0	0	0	0	0	0	0	0	0	0	0	0	0	0	0	0	0	0	0
59	10	2018-03-11		0	4	0	0	0	0	0	0	0	0	0	0	0	0	0	0	0	0	0	0	0	0	0	0	0	0	0	0	0	0	0	0	0	0	4	0	0	0	0	0	0	0	0	0	0	0
59	10	2018-03-14		0	1	0	0	0	0	0	0	0	0	1	0	0	0	0	0	0	0	0	0	0	0	0	0	0	0	0	0	0	0	0	0	0	0	0	0	0	0	0	0	0	0	0	0	0	0
60	127	2018-03-04		0	1	0	0	0	0	0	0	0	0	0	0	0	0	0	0	0	0	0	0	0	0	0	0	0	0	0	0	0	0	0	0	0	0	0	0	0	1	0	0	0	0	0	0	0	0
60	3.5	2018-03-17		0	0	1	0	0	0	0	0	0	0	0	0	0	0	0	0	0	0	0	0	0	0	0	0	0	0	0	0	0	0	0	0	0	0	0	0	0	0	0	0	0	0	0	0	0	0
60	11	2018-04-22		0	1	0	0	0	0	0	0	1	0	0	0	0	0	0	0	0	0	0	0	0	0	0	0	0	0	0	0	0	0	0	0	0	0	0	0	0	0	0	0	0	0	0	0	0	0
60	11	2018-04-23		0	1	0	0	0	0	0	0	0	0	0	0	1	0	0	0	0	0	0	0	0	0	0	0	0	0	0	0	0	0	0	0	0	0	0	0	0	0	0	0	0	0	0	0	0	0
60	10	2018-04-24		0	1	0	0	0	0	0	0	0	0	0	0	0	0	0	0	0	0	0	0	0	0	0	0	0	0	0	0	0	0	0	0	0	0	0	0	0	0	0	0	0	1	0	0	0	0
60	13	2018-04-26		0	1	0	0	0	0	0	0	0	0	1	0	0	0	0	0	0	0	0	0	0	0	0	0	0	0	0	0	0	0	0	0	0	0	0	0	0	0	0	0	0	0	0	0	0	0
60	8	2018-05-04		0	1	0	0	0	0	0	0	0	0	0	0	0	0	0	0	0	1	0	0	0	0	0	0	0	0	0	0	0	0	0	0	0	0	0	0	0	0	0	0	0	0	0	0	0	0
60	10.5	2018-05-10		0	1	0	0	0	0	0	0	0	0	1	0	0	0	0	0	0	0	0	0	0	0	0	0	0	0	0	0	0	0	0	0	0	0	0	0	0	0	0	0	0	0	0	0	0	0
60	8.5	2018-05-17		0	1	0	0	0	0	0	0	0	0	0	0	0	0	0	0	0	0	0	0	0	0	0	0	0	0	0	0	0	0	1	0	0	0	0	0	0	0	0	0	0	0	0	0	0	0
60	6	2018-06-23		0	1	0	0	0	0	0	0	0	0	0	0	0	0	0	0	0	0	0	0	0	0	0	0	0	0	0	0	1	0	0	0	0	0	0	0	0	0	0	0	0	0	0	0	0	0
61	5	2015-11-18		0	1	0	0	0	0	0	0	0	0	0	0	0	0	0	0	0	0	0	1	0	0	0	0	0	0	0	0	0	0	0	0	0	0	0	0	0	0	0	0	0	0	0	0	0	0
61	4	2018-10-17		0	1	0	0	0	0	0	0	0	0	1	0	0	0	0	0	0	0	0	0	0	0	0	0	0	0	0	0	0	0	0	0	0	0	0	0	0	0	0	0	0	0	0	0	0	0
61	13	2018-10-19		0	5	0	0	1	0	0	0	0	0	2	0	0	0	0	0	0	0	0	0	0	0	0	0	0	0	0	0	0	0	1	0	0	0	0	0	0	1	0	0	0	0	0	0	0	0
61	9	2018-10-22		0	3	0	0	1	0	0	0	0	0	0	0	0	0	0	0	0	0	0	0	0	0	0	0	0	0	0	0	0	0	0	0	0	0	1	0	0	0	0	0	0	0	0	0	0	1
61	5	2018-10-24		1	0	0	0	0	0	0	0	0	0	0	0	0	0	0	0	0	0	0	0	0	0	0	0	0	0	0	0	0	0	0	0	0	0	0	0	0	0	0	0	0	0	0	0	0	0
61	5	2018-10-26		1	0	0	0	0	0	0	0	0	0	0	0	0	0	0	0	0	0	0	0	0	0	0	0	0	0	0	0	0	0	0	0	0	0	0	0	0	0	0	0	0	0	0	0	0	0
61	5	2018-10-27		1	0	0	0	0	0	0	0	0	0	0	0	0	0	0	0	0	0	0	0	0	0	0	0	0	0	0	0	0	0	0	0	0	0	0	0	0	0	0	0	0	0	0	0	0	0
61	5	2018-10-29		1	0	0	0	0	0	0	0	0	0	0	0	0	0	0	0	0	0	0	0	0	0	0	0	0	0	0	0	0	0	0	0	0	0	0	0	0	0	0	0	0	0	0	0	0	0
61	6	2018-11-05		0	2	0	0	0	0	0	0	0	0	2	0	0	0	0	0	0	0	0	0	0	0	0	0	0	0	0	0	0	0	0	0	0	0	0	0	0	0	0	0	0	0	0	0	0	0
61	6	2018-11-08		1	0	0	0	0	0	0	0	0	0	0	0	0	0	0	0	0	0	0	0	0	0	0	0	0	0	0	0	0	0	0	0	0	0	0	0	0	0	0	0	0	0	0	0	0	0
61	8	2018-11-12		0	5	0	1	1	0	0	0	0	0	0	0	0	0	0	0	0	0	0	0	0	0	0	0	0	0	0	0	0	0	0	0	0	0	0	0	0	0	2	0	1	0	0	0	0	0
61	5	2018-11-24		0	1	0	0	0	0	0	0	0	0	1	0	0	0	0	0	0	0	0	0	0	0	0	0	0	0	0	0	0	0	0	0	0	0	0	0	0	0	0	0	0	0	0	0	0	0
61	5	2018-11-26		0	0	1	0	0	0	0	0	0	0	0	0	0	0	0	0	0	0	0	0	0	0	0	0	0	0	0	0	0	0	0	0	0	0	0	0	0	0	0	0	0	0	0	0	0	0
61	6	2018-11-29		0	0	1	0	0	0	0	0	0	0	0	0	0	0	0	0	0	0	0	0	0	0	0	0	0	0	0	0	0	0	0	0	0	0	0	0	0	0	0	0	0	0	0	0	0	0
61		2018-12-01		0	0	1	0	0	0	0	0	0	0	0	0	0	0	0	0	0	0	0	0	0	0	0	0	0	0	0	0	0	0	0	0	0	0	0	0	0	0	0	0	0	0	0	0	0	0
61		2018-12-04		1	0	0	0	0	0	0	0	0	0	0	0	0	0	0	0	0	0	0	0	0	0	0	0	0	0	0	0	0	0	0	0	0	0	0	0	0	0	0	0	0	0	0	0	0	0
61	7	2018-12-06		0	0	1	0	0	0	0	0	0	0	0	0	0	0	0	0	0	0	0	0	0	0	0	0	0	0	0	0	0	0	0	0	0	0	0	0	0	0	0	0	0	0	0	0	0	0
61	7	2018-12-09		0	2	0	0	0	0	0	0	0	0	1	0	0	0	0	0	0	0	0	0	0	0	0	0	0	0	0	0	0	0	1	0	0	0	0	0	0	0	0	0	0	0	0	0	0	0
61	7	2018-12-17		0	1	0	0	0	0	0	0	0	0	0	0	0	0	0	0	0	0	0	0	0	0	0	0	0	1	0	0	0	0	0	0	0	0	0	0	0	0	0	0	0	0	0	0	0	0
61		2018-12-22		0	2	0	1	0	0	0	0	0	0	0	0	0	0	0	0	0	0	0	0	0	0	0	1	0	0	0	0	0	0	0	0	0	0	0	0	0	0	0	0	0	0	0	0	0	0
61	53	2018-12-27		0	3	0	0	0	0	0	0	0	0	1	0	0	0	0	0	0	0	0	0	0	0	0	0	0	0	0	0	0	0	0	0	1	0	1	0	0	0	0	0	0	0	0	0	0	0
61	3	2019-01-01		0	1	0	0	0	0	0	0	0	0	0	0	0	0	0	0	0	0	0	0	0	0	0	0	0	0	0	0	0	0	1	0	0	0	0	0	0	0	0	0	0	0	0	0	0	0
61	9	2019-01-04		0	2	0	0	0	0	0	0	0	0	2	0	0	0	0	0	0	0	0	0	0	0	0	0	0	0	0	0	0	0	0	0	0	0	0	0	0	0	0	0	0	0	0	0	0	0
61	7	2019-01-10		0	1	0	0	1	0	0	0	0	0	0	0	0	0	0	0	0	0	0	0	0	0	0	0	0	0	0	0	0	0	0	0	0	0	0	0	0	0	0	0	0	0	0	0	0	0
61	5	2019-01-18		0	2	0	0	0	0	0	0	0	0	0	0	0	0	0	0	0	0	0	0	0	0	0	0	0	0	0	0	0	0	2	0	0	0	0	0	0	0	0	0	0	0	0	0	0	0
61	7	2019-01-27		0	3	0	0	0	0	0	0	0	0	1	0	0	0	0	0	0	0	0	0	0	0	0	0	0	0	0	0	1	0	0	0	0	0	0	0	0	0	0	0	0	0	0	0	0	1
61	10	2019-02-02		0	3	0	0	0	0	0	0	0	0	0	0	0	0	0	0	0	0	0	0	0	0	0	0	0	0	0	0	1	0	1	0	0	0	0	0	0	0	0	0	0	0	0	0	0	0
61	8	2019-02-09		0	1	0	0	0	0	0	0	0	0	1	0	0	0	0	0	0	0	0	0	0	0	0	0	0	0	0	0	0	0	0	0	0	0	0	0	0	0	0	0	0	0	0	0	0	0
61	6	2019-02-14		0	1	0	0	0	0	0	0	0	0	1	0	0	0	0	0	0	0	0	0	0	0	0	0	0	0	0	0	0	0	0	0	0	0	0	0	0	0	0	0	0	0	0	0	0	0
61	6	2019-02-22		0	2	0	0	0	0	0	0	0	0	0	0	0	0	0	0	0	0	0	0	0	0	0	0	0	0	0	0	0	0	0	0	0	0	0	0	0	0	2	0	0	0	0	0	0	0
61	8	2019-02-26		0	3	0	0	0	0	0	0	0	0	1	0	0	0	0	0	0	0	0	0	1	0	0	0	0	0	0	0	0	0	0	0	0	0	0	0	0	0	0	0	0	0	0	0	0	1
62	77	2018-03-17		0	1	0	0	0	0	0	0	0	0	1	0	0	0	0	0	0	0	0	0	0	0	0	0	0	0	0	0	0	0	0	0	0	0	0	0	0	0	0	0	0	0	0	0	0	0
62	7	2018-03-24		0	2	0	0	0	0	0	0	1	0	0	0	0	0	0	0	0	0	0	0	0	0	0	0	0	0	0	0	0	0	0	0	0	0	0	0	0	0	1	0	0	0	0	0	0	0
62	57	2018-04-01		0	3	0	0	0	0	0	0	1	0	2	0	0	0	0	0	0	0	0	0	0	0	0	0	0	0	0	0	0	0	0	0	0	0	0	0	0	0	0	0	0	0	0	0	0	0
62	108	2018-04-05		0	3	0	0	0	0	0	0	1	0	2	0	0	0	0	0	0	0	0	0	0	0	0	0	0	0	0	0	0	0	0	0	0	0	0	0	0	0	0	0	0	0	0	0	0	0
63	10	2015-10-30		0	0	1	0	0	0	0	0	0	0	0	0	0	0	0	0	0	0	0	0	0	0	0	0	0	0	0	0	0	0	0	0	0	0	0	0	0	0	0	0	0	0	0	0	0	0
63	11	2018-10-18		0	3	0	0	0	0	0	0	0	0	2	0	0	0	0	0	0	0	0	0	0	0	0	0	0	0	0	0	0	0	0	0	0	0	0	0	0	0	1	0	0	0	0	0	0	0
63	5.5	2018-11-06		0	0	1	0	0	0	0	0	0	0	0	0	0	0	0	0	0	0	0	0	0	0	0	0	0	0	0	0	0	0	0	0	0	0	0	0	0	0	0	0	0	0	0	0	0	0
63	7.5	2018-11-24	x	0	1	0	0	1	0	0	0	0	0	0	0	0	0	0	0	0	0	0	0	0	0	0	0	0	0	0	0	0	0	0	0	0	0	0	0	0	0	0	0	0	0	0	0	0	0
63	78.5	2018-12-05	x	0	0	1	0	0	0	0	0	0	0	0	0	0	0	0	0	0	0	0	0	0	0	0	0	0	0	0	0	0	0	0	0	0	0	0	0	0	0	0	0	0	0	0	0	0	0
63	10	2018-12-29		1	0	0	0	0	0	0	0	0	0	0	0	0	0	0	0	0	0	0	0	0	0	0	0	0	0	0	0	0	0	0	0	0	0	0	0	0	0	0	0	0	0	0	0	0	0
63	2.5	2019-01-11		0	0	1	0	0	0	0	0	0	0	0	0	0	0	0	0	0	0	0	0	0	0	0	0	0	0	0	0	0	0	0	0	0	0	0	0	0	0	0	0	0	0	0	0	0	0
63	1.5	2019-01-25		0	0	1	0	0	0	0	0	0	0	0	0	0	0	0	0	0	0	0	0	0	0	0	0	0	0	0	0	0	0	0	0	0	0	0	0	0	0	0	0	0	0	0	0	0	0
63	9	2019-02-08		0	1	0	0	0	0	0	0	0	0	0	0	0	0	0	0	0	0	0	0	0	0	0	0	0	0	0	0	0	0	0	0	0	0	0	0	0	0	0	0	0	0	0	0	0	0
64		2018-03-18		0	1	0	0	0	0	0	0	0	0	0	0	0	0	0	0	0	0	0	0	0	0	0	0	0	0	0	0	0	0	0	0	0	0	0	0	0	0	1	0	0	0	0	0	0	0
64		2018-03-30		0	1	0	0	0	0	0	0	0	0	0	0	0	0	0	0	0	0	0	0	0	0	0	0	0	0	0	0	0	0	0	0	0	0	0	0	0	0	0	1	0	0	0	0	0	0
65		2018-10-25		0	2	0	1	0	0	0	0	0	0	0	0	0	0	0	0	0	0	0	0	0	0	0	0	0	0	0	0	1	0	0	0	0	0	0	0	0	0	0	0	0	0	0	0	0	0
65	7	2018-10-26		0	1	0	0	0	0	0	0	0	0	0	0	1	0	0	0	0	0	0	0	0	0	0	0	0	0	0	0	0	0	0	0	0	0	0	0	0	0	0	0	0	0	0	0	0	0
65	8	2018-10-27		0	1	0	0	0	0	1	0	0	0	0	0	0	0	0	0	0	0	0	0	0	0	0	0	0	0	0	0	0	0	0	0	0	0	0	0	0	0	0	0	0	0	0	0	0	0
65		2018-10-28		0	0	1	0	0	0	0	0	0	0	0	0	0	0	0	0	0	0	0	0	0	0	0	0	0	0	0	0	0	0	0	0	0	0	0	0	0	0	0	0	0	0	0	0	0	0
65	6.5	2018-10-30		0	1	0	1	0	0	0	0	0	0	0	0	0	0	0	0	0	0	0	0	0	0	0	0	0	0	0	0	0	0	0	0	0	0	0	0	0	0	0	0	0	0	0	0	0	0
65	7	2018-11-02		0	1	0	0	1	0	0	0	0	0	0	0	0	0	0	0	0	0	0	0	0	0	0	0	0	0	0	0	0	0	0	0	0	0	0	0	0	0	0	0	0	0	0	0	0	0
65	8	2018-11-04		0	1	0	0	1	0	0	0	0	0	0	0	0	0	0	0	0	0	0	0	0	0	0	0	0	0	0	0	0	0	0	0	0	0	0	0	0	0	0	0	0	0	0	0	0	0
65	7.5	2018-11-05		0	1	0	0	0	0	0	0	0	0	1	0	0	0	0	0	0	0	0	0	0	0	0	0	0	0	0	0	0	0	0	0	0	0	0	0	0	0	0	0	0	0	0	0	0	0
65	6.5	2018-11-06		0	2	0	0	1	0	0	0	0	0	0	0	0	0	0	0	0	0	0	0	0	0	0	0	0	0	0	0	0	0	0	0	0	0	0	0	0	0	0	0	0	0	0	0	0	1
65	9	2018-11-08		0	1	0	0	1	0	0	0	0	0	0	0	0	0	0	0	0	0	0	0	0	0	0	0	0	0	0	0	0	0	0	0	0	0	0	0	0	0	0	0	0	0	0	0	0	0
65	7.5	2018-11-10		0	1	0	0	0	0	1	0	0	0	0	0	0	0	0	0	0	0	0	0	0	0	0	0	0	0	0	0	0	0	0	0	0	0	0	0	0	0	0	0	0	0	0	0	0	0
65	8	2018-11-11		0	3	0	1	1	0	0	0	0	0	1	0	0	0	0	0	0	0	0	0	0	0	0	0	0	0	0	0	0	0	0	0	0	0	0	0	0	0	0	0	0	0	0	0	0	0
65	6	2018-11-17		0	1	0	1	0	0	0	0	0	0	0	0	0	0	0	0	0	0	0	0	0	0	0	0	0	0	0	0	0	0	0	0	0	0	0	0	0	0	0	0	0	0	0	0	0	0
65	7.5	2018-11-25		0	3	0	1	2	0	0	0	0	0	0	0	0	0	0	0	0	0	0	0	0	0	0	0	0	0	0	0	0	0	0	0	0	0	0	0	0	0	0	0	0	0	0	0	0	0
65	31	2018-11-29		0	1	0	0	0	0	0	0	0	0	1	0	0	0	0	0	0	0	0	0	0	0	0	0	0	0	0	0	0	0	0	0	0	0	0	0	0	0	0	0	0	0	0	0	0	0
65	6.5	2018-12-01		0	1	0	0	1	0	0	0	0	0	0	0	0	0	0	0	0	0	0	0	0	0	0	0	0	0	0	0	0	0	0	0	0	0	0	0	0	0	0	0	0	0	0	0	0	0
65	33.5	2018-12-06		0	3	0	1	1	0	0	0	0	0	1	0	0	0	0	0	0	0	0	0	0	0	0	0	0	0	0	0	0	0	0	0	0	0	0	0	0	0	0	0	0	0	0	0	0	0
65	9.5	2018-12-11		0	1	0	1	0	0	0	0	0	0	0	0	0	0	0	0	0	0	0	0	0	0	0	0	0	0	0	0	0	0	0	0	0	0	0	0	0	0	0	0	0	0	0	0	0	0
65	9	2018-12-15		0	3	0	1	1	0	0	0	0	0	1	0	0	0	0	0	0	0	0	0	0	0	0	0	0	0	0	0	0	0	0	0	0	0	0	0	0	0	0	0	0	0	0	0	0	0
66	5	2018-03-11		0	1	0	0	0	0	0	0	0	0	0	0	0	0	0	0	0	0	0	0	0	0	0	0	0	0	0	0	0	0	0	0	0	0	0	0	0	0	0	0	0	0	0	0	0	1
68	7	2015-10-25		0	0	1	0	0	0	0	0	0	0	0	0	0	0	0	0	0	0	0	0	0	0	0	0	0	0	0	0	0	0	0	0	0	0	0	0	0	0	0	0	0	0	0	0	0	0
68	8	2015-10-27		0	1	0	0	0	0	0	0	0	0	0	0	0	0	0	0	0	0	0	0	0	0	0	0	0	0	0	0	0	0	0	0	0	0	0	0	0	0	0	0	0	0	0	0	0	0
68	8	2015-10-30		0	1	0	0	0	0	0	0	0	0	1	0	0	0	0	0	0	0	0	0	0	0	0	0	0	0	0	0	0	0	0	0	0	0	0	0	0	0	0	0	0	0	0	0	0	0
68	8	2018-10-17	x	0	4	0	0	0	0	0	0	0	0	1	0	0	0	0	0	0	0	0	0	0	0	0	0	0	0	0	0	0	0	0	0	0	0	0	0	0	0	1	0	0	0	0	0	0	0
68	12	2018-10-18	x	1	0	0	0	0	0	0	0	0	0	0	0	0	0	0	0	0	0	0	0	0	0	0	0	0	0	0	0	0	0	0	0	0	0	0	0	0	0	0	0	0	0	0	0	0	0
68	8.5	2018-10-22		0	3	0	0	1	0	0	0	0	0	0	0	0	0	0	0	0	0	0	0	0	0	0	0	0	0	0	0	0	0	0	0	0	0	0	0	0	2	0	0	0	0	0	0	0	0
68	3	2018-11-02		0	0	1	0	0	0	0	0	0	0	0	0	0	0	0	0	0	0	0	0	0	0	0	0	0	0	0	0	0	0	0	0	0	0	0	0	0	0	0	0	0	0	0	0	0	0
68	9	2018-11-03		0	0	1	0	0	0	0	0	0	0	0	0	0	0	0	0	0	0	0	0	0	0	0	0	0	0	0	0	0	0	0	0	0	0	0	0	0	0	0	0	0	0	0	0	0	0
68		2018-11-04		0	0	1	0	0	0	0	0	0	0	0	0	0	0	0	0	0	0	0	0	0	0	0	0	0	0	0	0	0	0	0	0	0	0	0	0	0	0	0	0	0	0	0	0	0	0
68	7.5	2018-11-08		0	1	0	0	0	0	0	0	0	0	0	0	0	0	0	0	0	0	0	0	0	0	0	0	0	0	0	0	0	0	0	0	0	0	0	0	0	0	0	1	0	0	0	0	0	0
68	7	2018-11-10		0	2	0	0	0	0	0	0	0	0	0	0	0	0	0	0	0	0	0	0	1	0	0	0	0	0	0	0	0	0	0	0	0	0	0	0	0	0	0	1	0	0	0	0	0	0
68	2	2018-11-13		0	1	0	0	0	0	0	0	0	0	0	0	0	0	0	0	0	0	0	0	0	0	0	0	0	1	0	0	0	0	0	0	0	0	0	0	0	0	0	0	0	0	0	0	0	0
68	5.5	2018-11-14		0	0	1	0	0	0	0	0	0	0	0	0	0	0	0	0	0	0	0	0	0	0	0	0	0	0	0	0	0	0	0	0	0	0	0	0	0	0	0	0	0	0	0	0	0	0
68	6.5	2018-11-15		1	0	0	0	0	0	0	0	0	0	0	0	0	0	0	0	0	0	0	0	0	0	0	0	0	0	0	0	0	0	0	0	0	0	0	0	0	0	0	0	0	0	0	0	0	0
68		2018-11-16		0	1	0	0	0	0	0	0	0	0	0	0	0	0	0	0	0	0	0	0	0	0	0	0	0	0	0	0	0	0	0	0	0	0	0	0	0	0	1	0	0	0	0	0	0	0
[truncated: 1,033 more rows]
[truncated: 10 more columns]
