# Supplementary material for: Wild meat hunting and use by sedentarised Baka Pygmies in southeastern Cameroon
Source: PeerJ. 2020 Sep 17;8:e9906. doi: 10.7717/peerj.9906 (PMC7502248; doi:10.7717/peerj.9906)
Supplement: Supplemental Information S3 [file peerj-08-9906-s003.xlsx]

## Sheet: List of hunted species
Supplementary Table 4. List of hunted species, IUCN Red List status and Cameroon law Class, and numbers of carcasses recorded for each village in the ten study villages in southeastern Cameroon.
		Body mass (kg)	IUCN Red List[1]	Cameroon Law Class[2]	Village
Species					Adjap-Mintom	Akom	Akonetyé	Assok	Belle-Ville	Bemba	Doum	Meyos-Mintom	Abing-Nkolemboula	Odoumou	Grand Total
Aves
Bucerotiformes
Bucerotidae
Bycanistes_cilindricus	Brown-checked Hornbill	0.921	VU	C							1				1
Ceratogymna_atrata	Black-casqued Hornbill	1.348	LC	C							2			1	3
Galliformes
Numididae
Agelastes_niger	Black Guineafowl	0.7	LC	C		1					1	3	5	1	11
Guttera_plumifera	Plumed Guineafowl	0.875	LC	C								3	6	2	11
Phasianidae
Peliperdix_lathami_Pternistis_squamatus	Francolins	0.3685	LC	C					1		5		2		8
unspecified_bird		NA									4		6		10
Mammalia		0.269/0.468
Artiodactyla
Bovidae
Cephalophus_callipygus	Peter's Duiker	18.25	LC	B	2	11	54	10	11	19	17	11	10	9	154
Cephalophus_dorsalis	Bay Duiker	20	NT	B	11	47	63	4	10	18	16	20	8	29	226
Cephalophus_leucogaster	White-bellied Duiker	12.7	NT	C				1				1	1		3
Cephalophus_nigrifrons	Black-fronted Duiker	13.9	LC	C	1	6	8					5		3	23
Cephalophus_silvicultor	Yellow-backed Duiker	72.5	NT	B		2			1	2	5	11	2	4	27
Cephalophus_spp	Undetermined Red Duikers	NA		-				11	8	4	23		8		54
Neotragus_batesi	Bates's Pygmy Antelope	3	LC	C		1						1	1		3
Philantomba_monticola	Blue Duiker	6.25	LC	C	21	72	18	16	28	87	67	24	43	28	404
Tragelaphus_spekeii	Sitaunga	78	LC	B		3	2			1	3	4	1	2	16
Suidae
Potamochoerus_porcus	Red River Hog	70	LC	B	1	3	5		5	1	4	5	3	9	36
Tragulidae
Hyemoschus_aquaticus	Water Chevrotain	10.85	LC	C		8					2	9		3	22
Carnivora
Felidae
Caracal_aurata	African Golden Cat	10.65	VU	B							1	1	2		4
Herpestidae
Atilax_paludinosus	Marsh Mongoose	2.8	LC	C		5						1			6
Bdeogale_nigripes	Black-footed Mongoose	2.5	LC	C	2					2		3	4	1	12
Civettictis_civetta	African Civet	12	LC	B						4	1	2	3	1	11
Crossarchus_obscurus	Common Kusimanse	1.25	LC	C							4		1		5
Genetta_servalina	Servaline Genet	1.055	LC	B		4						3	3		10
Xenogale_naso	Long-nosed Mongoose	2.9	LC	C	2	16	3					7			28
unspecified_mongoose		NA						1		11	5		8		25
Mustelidae
Aonyx_congicus	Congo Clawless Otter	21.4	NT	B			1		1		5	1			8
Nandiniidae
Nandinia_binotata	African Palm Civet	2	LC	C	3	16		2	2	11	13	4	10	9	70
Hyracoidea
Procaviidae
Dendrohyrax_dorsalis	Western Tree Hyrax	3.175	LC	C	1					1	1				3
Pholidota
Manidae
Phataginus tricuspis/P. tetradactyla	Tree Pangolin/Black-bellied Pangolin	2.425	VU	C	4	23	1		5	17	18	9	10	4	91
Smutsia_gigantea	Giant Pangolin	33	VU	A							1	2		3	6
Primates
Cercopithecidae
Cercocebus_agilis	Agile Mangabey	8	LC	A		2				1	1	3		1	8
Cercopithecus_cephus	Moustached Guenon	3.485	LC	C	3	16	1		2	12	3	5	2	2	46
Cercopithecus_neglectus	De Brazza's Monkey	5.48	LC	C?							1				1
Cercopithecus_nictitans	Greater Spot-nosed Monkey	5.41	NT	C		23			1	22	8	7	2	5	68
Cercopithecus_pogonias	Crowned Monkey	3.65	VU	C		1						3		2	6
Colobus_guereza	Mantled Guereza	10.2	LC	A		1				1	4	2		1	9
Lophocebus_albigena	Grey-cheeked Mangabey	7.69	LC	C		2				3	5	1	1	4	16
Mandrillus_sphinx	Mandrill	18.25	VU	A	1	6				1	2	7	7	9	33
Hominidae
Pan_troglodytes	Chimpanzee	45	EN	A							1	1		1	3
Lorisidae
Perodicticus_edwardsi	Milne-Edwards's Potto	1.537	LC	C?										2	2
unspecified_monkey		NA			1	1			6	3	14				25
Rodentia
Hystricidae
Atherurus_africanus	African Brush-tailed Porcupine	1.93	LC	C	17	67	24	27	15	89	42	11	28	19	339
Nesomyidae
Cricetomys_emini	Emin's Pouched Rat	0.9191	LC	C	8	33		15	21	3	23	16	49	10	178
Sciuridae
unspecified_squirrel		NA				1			2					1	4
Thryonomyidae
Thryonomys_swinderianus	Greater Cane Rat	4.06	LC	C		3	1			7	12	6	11	2	42
Reptilia
Crocodilia
Crocodylidae
Osteolaemus_tetraspis	Dwarf Crocodile	41	VU	A					2			10	2		14
Squamata
Elapidae
Dendroaspis_jamesoni	Jameson's mamba	0.9	LC	C								1	2		3
Naja_nigricollis	Black-necked Spitting Cobra	1.2	LC	B		1				2	2	2	3	2	12
Varanidae
Varanus_ornatus	Ornate monitor	5	VU	B		6	1	1	2	3	6	5	9		33
Viperidae
Bitis_gabonica	Gaboon Viper	3.5	LC	C	2	8		1		2	5	8	9	2	37
unspecified_snake		NA											2		2
Testudines
Testudinidae
Kinixys_erosa	Forest Hinge-back Tortoise	1.5	DD	B	4	10			1	8	13	11	21	3	71
unspecified		NA							2						2
Grand Total					84	399	182	89	126	335	341	229	285	175	2245
		53
[1] DD = Data Deficient; LC = Least Concern; NT = Near Threatened; VU = Vulnerable; EN = Endangered.
[2] Hunting Classes - A = Big Game; B = Medium game; C = Small game.
